# Supplementary material for: Increased contribution of parasites in microbial eukaryotic communities of different Aegean Sea coastal systems
Source: PeerJ. 2023 Dec 19;11:e16655. doi: 10.7717/peerj.16655 (PMC10740597; doi:10.7717/peerj.16655)
Supplement: Supplemental Information 1 [file peerj-11-16655-s001.xlsx]

## Sheet: Table S1
Table S1, Environmental parameters measured in all different samples. 2Xsecchi samples that corrspond to bottom water are highlighted in red
Gulf	envdata	Depth	temp	salinity	sigma_t	chla	pheophytin	NO3	NO2	PO4	SiO2	NH3
Gera	G1_1	1	24.16	38.87	26.53	0.6675	1.08475	3.48187	0.01	1.49674	88.9682	0.772995
Gera	G1_2	5	24.14	38.9	26.56	1.068	1.7356	2.32124	0.148702	3.89153	98.3006	0.730637
Gera	G1_3	10	24.08	38.88	26.55	0.6675	1.3067	0.01	0.198269	2.39479	202.201	1.44994
Gera	G2_1	1	24.45	38.89	26.45	0.6675	1.52865	4.64249	0.01	1.49674	87.7239	0.532351
Gera	G2_2	5.5	24.38	38.88	26.47	0.9345	1.2967	8.12435	0.297404	1.79609	87.1018	0.756943
Gera	G2_3	9	24.38	38.87	26.46	0.801	2.1895	1.16062	0.247836	1.19739	97.6784	0.439459
Gera	G3_1	1	24.19	38.78	26.45	0.1335	1.3267	2.32124	0.0495673	1.64641	170.471	0.43249
Gera	G3_2a	9	24.09	39.01	26.65	0.534	0.8678	1.16062	0.01	2.09544	174.826	0.700152
Gera	G3_2b	9	24.09	39.01	26.65	0.6675	0.8628	6.96373	0.01	2.39479	55.3718	0.510101
Gera	G3_3	16	23.7	38.84	26.64	1.068	0.4039	4.64249	0.0495673	1.94576	79.0138	0.762698
Gera	G4_1	1	24.42	38.79	26.38	1.602	0.3839	4.64249	0.01	2.39479	116.343	0.192508
Gera	G4_2	7	24.16	39.02	26.64	1.068	0.8478	1.16062	0.01	2.39479	80.8802	0.945349
Gera	G4_3	14	23.98	39.16	26.8	2.136	2.5834	1.16062	0.01	2.54446	219.123	1.13359
Gera	G5_1	1	24.48	38.97	26.51	1.602	0.3839	8.12435	0.01	1.49674	138.119	0.746626
Gera	G5_2	7.5	24.37	39.02	26.57	0.534	0.8678	4.64249	0.01	1.87093	107.011	0.889854
Gera	G5_3	10	24.34	39	26.57	0.01	1.3317	13.9275	0.01	1.49674	174.204	1.22967
Kalloni	K1_1	1	25.41	39.39	26.54	1.2015	0.3989	4.64249	0.01	0.149674	253.217	1.28411
Kalloni	K1_2	3	24.99	39.37	26.66	0.801	0.4139	12.7668	0.01	1.34707	266.905	1.25863
Kalloni	K1_3	6	24.66	39.42	26.79	1.335	0.8378	5.80311	0.01	0.74837	319.788	1.34557
Kalloni	K2_1	1	25.51	39.52	26.61	0.534	1.3117	16.2487	0.0495673	1.34707	301.745	1.36367
Kalloni	K2_2	3	25.37	39.49	26.63	0.267	0.8778	11.6062	0.0495673	0.598696	316.055	1.43852
Kalloni	K2_3	6	24.83	39.63	26.9	0.801	1.3017	9.28497	0.0743509	2.09544	281.214	1.16168
Kalloni	K3_1	1	24.92	39.29	26.62	0.801	0.8578	13.9275	0.01	0.898045	155.539	1.15395
Kalloni	K3_2a	4	24.64	39.3	26.71	0.534	0.8678	3.48187	0.0991346	0.299348	652.019	1.35459
Kalloni	K3_2b	4	24.64	39.3	26.71	1.602	1.7156	2.32124	0.148702	0.598696	154.295	1.47748
Kalloni	K3_2c	4	24.64	39.3	26.71	0.801	0.8578	5.80311	0.148702	0.74837	213.399	1.48738
Kalloni	K3_3	8	24.29	39.34	26.85	0.801	0.8578	5.80311	0.123918	0.898045	278.104	1.31888
Kalloni	K4_1	1	24.86	39.31	26.65	0.534	0.8678	2.32124	0.297404	2.39479	189.135	1.5482
Kalloni	K4_2	4	24.5	39.35	26.79	0.267	1.3217	4.64249	0.247836	1.49674	257.572	1.56902
Kalloni	K4_3	8	24.21	39.36	26.88	1.335	0.8378	5.80311	0.346971	1.19739	181.047	1.65514
Kalloni	K5_1	1	24.89	39.28	26.62	0.6675	0.64085	6.96373	0.346971	1.04772	280.592	1.62231
Kalloni	K5_2	3.5	24.39	39.31	26.79	1.068	0.8478	2.32124	0.396538	1.19739	291.791	1.55857
Kalloni	K5_3	7	24.18	39.29	26.84	0.801	0.8578	3.48187	0.396538	0.74837	200.956	1.87911
Kavala	KV1_1	1	25.9976	34.05	22.3194	0.01	0.01	18.5405	0.454639	0.01	69.7711	0.860094
Kavala	KV1_2	20	18.9469	37.7339	27.1281	0.01	0.01	5.19135	0.353608	0.01	93.8139	0.950735
Kavala	KV1_3	33	16.8776	38.5142	28.2452	0.5	1.5	4.44973	0.328351	0.46598	80.6139	0.804519
Kavala	KV2_1	1	26.0992	34.2898	22.4687	0.01	0.01	5.19135	0.55567	0.46598	74.4854	0.658429
Kavala	KV2_2	15	24.1655	34.8448	23.4765	0.1	0.1	3.70811	0.55567	0.01	38.1855	0.658429
Kavala	KV2_3	30	17.3353	38.1816	27.8778	3.9	0.01	4.82054	0.959794	0.01	87.6853	0.74255
Kavala	KV3_1	1	26	33.6104	21.9873	0.1	0.6	5.19135	1.3134	0.01	37.2427	0.708629
Kavala	KV3_2	13	23.1202	37.1908	25.5629	0.2	0.3	15.9449	0.808248	0.01	60.3426	0.854368
Kavala	KV3_3	26	16.8801	38.444	28.1906	0.01	0.3	3.70811	0.656701	0.01	108.428	0.699225
Kavala	KV4_1	1	26.1992	33.4403	21.7972	0.3	0.2	2.22486	0.303093	0.776633	65.5283	1.12352
Kavala	KV4_2	17	20.413	37.7886	26.7806	0.1	0.3	1.38281	0.55567	0.01	47.1427	1.00292
Kavala	KV4_3	34	16.6153	39.0669	28.7344	0.3	0.4	6.08435	0.909279	0.310653	77.3139	0.969979
Kavala	KV5_1	1	25.8976	34.0586	22.357	0.01	0.01	20.0238	1.01031	0.01	73.0711	0.983024
Kavala	KV5_2A	19	18.1638	37.7361	27.3329	0.01	0.01	22.6195	1.81856	0.01	60.3426	1.59012
Kavala	KV5_2B	19	18.1638	37.7361	27.3329	0.01	0.01	8.15784	1.06083	0.01	44.3141	1.29271
Kavala	KV5_3	28	17.1801	39.7018	29.0847	0.4	1.5	12.2368	1.91959	0.01	84.8568	1.35459
Kodias (Lemnos)	LK1_1	1	25.54	33.28	21.88	0.1335	0.01	10.4961	0.594807	1.64641	151.184	0.607712
Kodias (Lemnos)	LK1_2	5	24.84	33.55	22.3	0.1335	0.21695	11.1322	0.54524	1.19739	116.965	0.671756
Kodias (Lemnos)	LK1_3	13	22.74	37.07	25.58	0.1335	0.4389	1.90838	0.0495673	1.04772	109.499	0.732696
Kodias (Lemnos)	LK2_1	1	26.14	33.02	21.5	0.9345	0.18695	4.77096	0.0495673	0.898045	46.6617	0.611785
Kodias (Lemnos)	LK2_2	10.5	23.34	34.58	23.52	0.1335	0.21695	15.2671	0.346971	1.34707	93.3233	0.671756
Kodias (Lemnos)	LK2_3	17	22.52	37.82	26.21	0.1335	0.21695	8.58773	0.446106	1.19739	59.1048	0.557168
Kodias (Lemnos)	LK3_1	1	25.91	33.07	21.61	0.267	0.4339	6.99741	0.446106	1.19739	73.4144	0.713378
Kodias (Lemnos)	LK3_2a	11	23.03	35.66	24.42	0.1335	0.4389	6.99741	0.0991346	1.04772	103.9	0.435163
Kodias (Lemnos)	LK3_2b	11	23.03	35.66	24.42	0.1335	0.21695	6.99741	0.54524	0.898045	69.6814	0.330913
Kodias (Lemnos)	LK3_2c	11	23.03	35.66	24.42	0.1335	0.01	13.6768	0.693942	0.898045	74.6587	0.333131
Kodias (Lemnos)	LK3_3	16	22.56	37.86	26.23	0.1335	0.21695	12.4045	0.793077	0.898045	192.868	0.307471
Kodias (Lemnos)	LK4_1	1	26.1	33.19	21.64	0.267	0.65585	4.77096	0.396538	1.19739	125.675	0.272639
Kodias (Lemnos)	LK4_2	5	25.16	33.48	22.15	0.267	0.01	5.72515	0.54524	1.64641	97.6784	0.265451
Kodias (Lemnos)	LK4_3	12	23.19	35.32	24.12	0.267	0.01	4.13483	0.247836	1.64641	223.354	0.274466
Kodias (Lemnos)	LK5_1	1	26.15	32.86	21.37	0.1335	0.66085	7.31547	0.148702	1.64641	62.8377	0.737606
Kodias (Lemnos)	LK5_2	13	22.91	35.57	24.39	1.335	0.17195	11.4503	0.396538	1.64641	190.38	0.497359
Kodias (Lemnos)	LK5_3	23	22.22	38.29	26.66	0.1335	0.4389	7.9516	0.54524	1.94576	133.763	0.504048
Moudros (lemnos)	M1_1	1	25.57	32.77	21.49	0.534	0.4	8.26967	0.446106	1.04772	77.7694	0.462126
Moudros (lemnos)	M1_2	5	25.57	32.79	21.5	0.267	0.4	3.18064	0.148702	1.34707	65.9485	0.41252
Moudros (lemnos)	M1_3	10	24.06	36.75	24.95	0.4005	0.9	0.01	0.148702	0.74837	70.9257	0.468341
Moudros (lemnos)	M2_1	1	25.54	32.51	21.3	0.801	0.4139	1.90838	0.54524	1.94576	135.63	0.703912
Moudros (lemnos)	M2_2a	5	25.54	32.93	21.61	0.267	0.4339	0.954192	0.148702	2.39479	197.845	0.84303
Moudros (lemnos)	M2_2b	5	25.54	32.93	21.61	0.267	0.4339	11.4503	0.446106	2.24511	174.826	0.820804
Moudros (lemnos)	M2_2c	5	25.54	32.93	21.61	0.267	0.4339	5.40709	0.01	2.54446	87.1018	0.877503
Moudros (lemnos)	M2_3	10	24.71	34.38	22.96	1.068	0.4039	1.59032	0.01	3.74185	108.255	0.603666
Moudros (lemnos)	M3_1	1	24.64	32.3	21.41	0.534	0.4239	3.18064	0.01	1.04772	76.5251	0.579951
Moudros (lemnos)	M3_2	5	25.56	32.88	21.57	0.267	0.4339	2.22645	0.198269	2.09544	72.17	0.671756
Moudros (lemnos)	M3_3	10	24.02	35.28	23.85	0.267	0.4339	2.86258	0.198269	1.49674	52.8832	0.658429
Moudros (lemnos)	M4_1	1	24.99	32.66	21.58	0.534	0.01	2.54451	0.396538	1.04772	125.675	0.407045
Moudros (lemnos)	M4_2	12	23.46	36.47	24.9	0.267	0.01	1.90838	0.54524	1.64641	239.53	0.404336
Moudros (lemnos)	M4_3	17	22.69	38.02	26.32	0.6675	0.8628	5.40709	0.148702	1.49674	121.942	0.39897
Moudros (lemnos)	M5_1	1	25.54	32.76	21.49	1.068	1.2917	6.36128	0.148702	2.24511	84.6132	0.969979
Moudros (lemnos)	M5_2	5	25.43	32.88	21.61	0.534	1.3117	9.54192	0.54524	1.94576	91.4569	0.84303
Moudros (lemnos)	M5_3	10	23.94	35.48	24.03	0.1335	0.21695	1.90838	0.495673	1.79609	124.431	0.667284
Saronikos	S2_1	1	25.3	39.22	26.4432	0.5	1.8	8.02027	1.56598	0.01	110.314	1.22906
Saronikos	S2_2	6	25.2	39.2414	26.4906	1.2	2	7.74371	0.909279	0.310653	102.3	1.43099
Saronikos	S2_3	13	24.9	39.223	26.5696	2.3	3.1	4.70154	0.909279	0.46598	96.171	1.80536
Saronikos	S3_1	1	24.6992	38.8399	26.341	1.1	2.6	1.38281	1.01031	0.46598	37.7141	1.46508
Saronikos	S3_2A	6	24.4	38.8423	26.4342	1.335	3.5012	2.21249	1.51546	1.39794	116.254	1.60637
Saronikos	S3_2B	6	24.4	38.8423	26.4342	1.7355	4.59595	1.93593	1.16186	0.155327	82.4996	1.4513
Saronikos	S3_3	13	18.29	38.802	28.1148	1.7	3.7	2.48905	1.11134	0.01	126.814	1.65515
Saronikos	S4_1	1	24.7	39.17	26.5909	1.3	2.6	1.10624	1.41443	0.01	81.5568	1.5296
Saronikos	S4_2	8	24.5	39.0212	26.5393	5.6	12.2	1.10624	1.41443	2.3299	82.4996	1.63866
Saronikos	S4_3	16	21.5877	38.8663	27.2775	1.6	3	0.553122	1.41443	0.776633	186.213	1.70608
Saronikos	S5_1	1	24.2016	39.0602	26.6596	0.7	1.3	0.829683	0.606186	0.01	73.5425	1.36019
Saronikos	S5_2	9	24.1	39.0614	26.6913	1.1	2.6	0.829683	0.656701	0.46598	66.9426	1.43099
Saronikos	S5_3	18	22.6	39.0283	27.1109	1.1	2.6	0.829683	0.707217	0.310653	103.242	1.22906
Thermaikos	T1_1	1	27.1	35.1102	22.7708	2.1	5.5	18.9114	1.41443	2.01925	262.585	6.51831
Thermaikos	T1_2	5	26.8923	35.2231	22.9223	1.9	4.4	11.8659	1.56598	1.08729	274.842	2.70779
Thermaikos	T1_3	10	25.2923	35.5854	23.6961	1.9	4.4	34.1146	3.08144	15.5327	376.67	10.8904
Thermaikos	T2_1	1	26.5	34.72	22.6674	4.3	12.7	21.1362	1.91959	1.24261	216.385	4.75531
Thermaikos	T2_2	5	25.877	35.0926	23.1435	1.8	1.1	9.64108	1.21237	1.39794	115.971	3.75688
Thermaikos	T2_3	10	25.6923	35.4115	23.4415	0.8	1.3	20.0238	1.21237	2.64055	154.156	2.62767
Thermaikos	T3_1	1	26.3	35.0799	23.0017	2.1	7	27.0692	0.303093	2.17457	114.557	1.96675
Thermaikos	T3_2	4	26.197	35.0903	23.0419	2	6.4	15.2032	0.01	1.08729	112.671	1.09157
Thermaikos	T3_3	8	26.2	35.2568	23.1665	0.7	1.8	12.6076	0.01	1.08729	207.428	1.92477
Thermaikos	T4_1	1	26.3992	35.4696	23.2644	0.1	0.4	18.5405	1.06083	1.08729	164.528	2.40127
Thermaikos	T4_2	15.5	21.9655	36.7926	25.592	0.01	1.5	40.4184	1.21237	3.57251	200.828	2.38331
Thermaikos	T4_3	25	16.7615	38.2916	28.102	0.7	2.9	29.2941	2.87938	7.76633	307.37	6.9729
Thermaikos	T5_1	1	26.3	35.42	23.2582	0.4	0.4	14.0908	1.66701	5.90241	147.556	3.05343
Thermaikos	T5_2A	12.5	24.1084	36.0602	24.4141	0.906481	1.88414	17.7989	2.37423	8.85362	254.099	9.85104
Thermaikos	T5_2B	12.5	24.1084	36.0602	24.4141	1.4127	1.82603	37.0811	2.37423	5.90241	296.056	4.5801
Thermaikos	T5_3	25	16.0652	38.3689	28.3279	0.6	1.6	23.3611	2.02062	9.78558	240.899	3.00792

## Sheet: Table S2
Table S2. Diversity indices in all different samples
Surface
	G1_1	G2_1	G3_1	G4_1	G5_1	K1_1	K2_1	K3_1	K4_1	K5_1	KV_2_1	KV_1_1	KV_3_1	KV_4_1	KV_5_1	LK_1_1	LK_2_1	LK_3_1	LK_4_1	LK_5_1	M_1_1	M_2_1	M3-1	M4-1	M5-1	S_2_1	S_3_1	S_4_1	S_5_1	T_1_1	T_2_1	T_3_1	T_4_1	T_5_1
Taxa_S	541	461	436	502	477	384	465	470	537	563	89	351	133	248	538	674	681	509	674	578	495	392	484	513	422	229	222	265	423	379	181	221	267	447
Individuals	42576	25627	30065	33540	29820	21998	56983	92081	68577	55840	5315	126247	10419	16283	78549	56042	61966	31110	76780	46300	23393	14986	25247	25148	18018	22640	86631	51017	40962	49297	6726	15980	8856	46337
Dominance_D	0.02535	0.0295	0.03441	0.02934	0.03242	0.02786	0.03453	0.03313	0.02723	0.03805	0.1041	0.1608	0.1553	0.07627	0.04488	0.01765	0.0327	0.03132	0.0303	0.0296	0.02962	0.03072	0.03262	0.02177	0.02698	0.2532	0.2077	0.1629	0.03176	0.1484	0.1596	0.1441	0.02217	0.03504
Shannon_H	4.391	4.392	4.178	4.382	4.3	4.272	4.098	4.216	4.373	4.179	2.73	2.696	2.636	3.368	3.869	4.761	4.408	4.364	4.431	4.356	4.362	4.307	4.273	4.612	4.394	2.447	2.256	2.775	4.064	3.007	2.885	2.725	4.415	4.241
Evenness_e^H/S	0.1492	0.1752	0.1496	0.1593	0.1545	0.1866	0.1295	0.1441	0.1477	0.116	0.1722	0.04224	0.1049	0.117	0.08903	0.1733	0.1206	0.1543	0.1246	0.1349	0.1584	0.1894	0.1482	0.1963	0.1918	0.05043	0.043	0.06053	0.1376	0.05339	0.09889	0.06906	0.3098	0.1554
Equitability_J	0.6977	0.7161	0.6874	0.7046	0.6972	0.7178	0.6672	0.6852	0.6957	0.6599	0.6082	0.4601	0.539	0.6109	0.6153	0.7309	0.6757	0.7002	0.6803	0.685	0.703	0.7213	0.6912	0.7391	0.7268	0.4502	0.4176	0.4974	0.6721	0.5065	0.5549	0.5049	0.7902	0.6949
Fisher_alpha	87.39	79.83	72.27	83.73	80.63	66.08	69.26	64.73	79.41	87.09	15.19	44.1	21.5	41.51	77.76	107.7	107	86.44	101.7	93.05	88.74	73.68	84.94	91.24	77.36	35.44	27.57	36.6	65.72	55.87	34.25	36.29	51.89	68.59
Berger-Parker	0.07201	0.1088	0.0908	0.1044	0.1067	0.06532	0.09548	0.1102	0.08025	0.1266	0.2117	0.3561	0.334	0.1874	0.1228	0.05373	0.1157	0.09084	0.09075	0.08387	0.09375	0.1157	0.08211	0.08088	0.07209	0.4721	0.3995	0.3627	0.07207	0.3308	0.361	0.2416	0.07272	0.1112
Chao-1	556	493.2	459.1	535.6	495.1	391.5	476.9	474.3	544.8	586.9	102.6	359.5	142.2	266.5	562.3	684.2	698.8	548.8	696.9	602.6	519.9	419.4	514.8	527.7	439.2	250.7	223.5	269.9	432.7	393.1	198.5	251.5	279.6	456.4
Secchi
	G2_2	G3_2a	G1_2	G4_2	G3_2b	G5_2	K1_2	K4_2	K2_2	K3_2a	K3_2c	K3_2b	K5_2	KV_1_2	KV_2_2	KV_3_2	KV_4_2	KV_5_2a	KV_5_2b	LK_1_2	LK_2_2	LK_3_2a	LK_3_2b	LK_3_2c	LK_5_2	LK_4_2	M_1_2	M_2_2a	M_2_2b	M_2_2b	M3-2	M4-2	M5-2	S_2_2	S_3_2a	S_3_2b	S_4_2	S_5_2	T_1_2	T_3_2	T_4_2	T_5_2b	T_5_2a	T_2_2
Taxa_S	534	231	86	551	456	562	451	510	317	511	501	464	423	594	89	199	309	458	657	799	763	283	1018	723	717	806	493	495	680	492	424	893	699	308	306	110	226	272	323	186	235	439	324	87
Individuals	30967	5196	744	51573	34135	50881	37926	61544	17096	38816	41652	38726	21514	105311	1365	12539	16071	30876	36487	68991	46309	3526	132772	45326	40798	92338	26929	27573	68913	22628	19710	87849	72186	55057	48372	29423	26319	32944	32409	15948	10760	22102	29073	645
Dominance_D	0.02102	0.03915	0.09155	0.03381	0.03952	0.02521	0.03411	0.02766	0.03401	0.02767	0.02659	0.03565	0.03461	0.06136	0.1285	0.06588	0.07187	0.053	0.02829	0.01894	0.01901	0.02062	0.01734	0.01813	0.02138	0.01986	0.0284	0.02867	0.0283	0.02835	0.05387	0.01965	0.02275	0.2547	0.09909	0.1995	0.127	0.1754	0.1327	0.1109	0.03511	0.05598	0.05687	0.05278
Shannon_H	4.565	4.012	3.267	4.135	4.063	4.454	4.175	4.359	4.048	4.359	4.345	4.18	4.183	3.647	2.925	3.346	3.474	3.718	4.459	4.768	4.805	4.579	4.84	4.797	4.674	4.724	4.341	4.37	4.428	4.439	4.005	4.773	4.55	2.337	3.205	2.365	2.908	2.743	2.987	2.854	4.144	3.931	3.852	3.558
Evenness_e^H/S	0.18	0.2393	0.3049	0.1134	0.1275	0.153	0.1443	0.1533	0.1806	0.1529	0.1539	0.1409	0.155	0.06459	0.2093	0.1426	0.1044	0.08993	0.1315	0.1473	0.16	0.3442	0.1242	0.1675	0.1494	0.1397	0.1557	0.1596	0.1232	0.1722	0.1295	0.1325	0.1354	0.03359	0.08056	0.09672	0.08106	0.05709	0.0614	0.09333	0.2684	0.1161	0.1454	0.4035
Equitability_J	0.7269	0.7372	0.7333	0.6551	0.6636	0.7035	0.6832	0.6992	0.7029	0.6989	0.6989	0.6808	0.6917	0.5711	0.6516	0.632	0.6059	0.6069	0.6873	0.7134	0.7239	0.8111	0.6988	0.7286	0.7109	0.7058	0.7001	0.7042	0.679	0.7162	0.6621	0.7025	0.6947	0.4078	0.5599	0.503	0.5365	0.4893	0.5171	0.5462	0.7591	0.6461	0.6664	0.7968
Fisher_alpha	91.67	49.55	25.14	86.14	74.37	88.41	71.94	76.17	55.25	83.11	80.08	74.11	74.64	83.14	21.32	33.59	54.27	76.26	113.8	126.8	129.8	72.47	150	122.1	123.6	121.5	85.69	85.68	104.8	88.72	76.28	138.3	107.3	43.05	43.64	14.43	33.96	40.6	49.86	29.56	42.42	77.63	51.05	27.09
Berger-Parker	0.06794	0.1043	0.2581	0.09835	0.1013	0.07093	0.09714	0.08916	0.07815	0.0922	0.08427	0.1232	0.1075	0.1381	0.304	0.171	0.1804	0.1037	0.07131	0.0657	0.07476	0.0814	0.06657	0.06144	0.08329	0.07006	0.08619	0.1093	0.1072	0.1153	0.1813	0.06347	0.07284	0.4444	0.2552	0.3971	0.2418	0.3824	0.2885	0.196	0.0947	0.1577	0.1762	0.1488
Chao-1	553.2	259.4	105.5	568.4	480.4	592.7	477.2	519.3	335.7	524.8	516.2	485.3	465	601.6	100.1	208.8	326.3	480.7	678.3	821.4	799.1	317.1	1035	746.2	749.1	815.8	533.5	516	701.5	509.2	444.3	902.3	713.9	321	313.8	113	228.7	278	341.5	208.5	241.3	464	330.7	120.5
2xSecchi
	G2_3	G1_3	G5_3	G3_3	G4_3	K1_3	K4_3	K2_3	K3_3	K5_3	KV_1_3	KV_2_3	KV_3_3	KV_4_3	KV_5_3	LK_1_3	LK_2_3	LK_3_3	LK_4_3	LK_5_3	M2-3	M3-3	M_1_3	M4-3	M5-3	S_2_3	S_3_3	S_4_3	S_5_3	T_1_3	T_2_3	T_3_3	T_4_3	T_5_3
Taxa_S	528	522	196	209	562	491	471	285	453	244	925	451	332	556	497	578	835	188	853	586	497	640	631	578	603	349	386	428	236	473	439	260	530	598
Individuals	32651	32244	2053	3171	35732	39671	28984	11646	28457	4923	71184	20168	11918	27840	30886	24821	59392	1453	80199	20959	25055	50317	150124	30251	33310	72260	82564	45775	32588	24338	34396	24560	23555	89274
Dominance_D	0.07552	0.02223	0.0238	0.02817	0.02018	0.02915	0.02866	0.04008	0.03354	0.03025	0.06932	0.04511	0.04952	0.07462	0.04445	0.0262	0.01895	0.02358	0.0217	0.02426	0.02354	0.02164	0.06516	0.03305	0.02176	0.1641	0.1135	0.04826	0.1379	0.03625	0.05581	0.126	0.08689	0.1901
Shannon_H	3.923	4.514	4.333	4.288	4.606	4.227	4.291	3.938	4.205	4.28	4.255	3.945	3.78	3.968	4.086	4.587	4.831	4.426	4.747	4.688	4.497	4.596	3.602	4.324	4.605	2.748	3.177	3.932	2.709	4.267	4.022	2.91	4.195	3.124
Evenness_e^H/S	0.09574	0.1749	0.3886	0.3483	0.1781	0.1395	0.1551	0.18	0.1479	0.2961	0.07614	0.1146	0.132	0.09507	0.1197	0.1698	0.1501	0.4449	0.135	0.1854	0.1806	0.1548	0.05811	0.1306	0.1658	0.04473	0.06212	0.1192	0.06363	0.1508	0.1272	0.07058	0.1252	0.038
Equitability_J	0.6258	0.7213	0.8209	0.8026	0.7275	0.6821	0.6972	0.6966	0.6875	0.7786	0.6229	0.6455	0.6512	0.6277	0.6581	0.7212	0.7181	0.8453	0.7033	0.7356	0.7244	0.7112	0.5587	0.6799	0.7193	0.4693	0.5334	0.6489	0.4958	0.6928	0.6611	0.5233	0.6688	0.4885
Fisher_alpha	89.45	88.45	53.31	50.23	94.68	78.91	79.87	52.76	76.5	53.92	150.1	81.83	63.32	98.44	84.11	105.8	137.6	57.53	133.2	111.9	87.86	103.4	84.3	101.4	104.6	47.65	52.43	65.31	34.43	83.26	70.97	40.58	96.3	86.11
Berger-Parker	0.2379	0.05868	0.06868	0.1072	0.0586	0.07275	0.08129	0.1058	0.1078	0.1144	0.2431	0.1129	0.1212	0.2393	0.1583	0.09645	0.06907	0.08259	0.09884	0.07796	0.06142	0.06886	0.162	0.09388	0.06151	0.3443	0.2833	0.1403	0.2283	0.1256	0.187	0.2559	0.2796	0.3998
Chao-1	547	551.7	222.2	231.9	583.3	502	509.5	308.1	482	252.7	946.1	473.3	363.6	579.7	533.5	616.9	857.9	201.7	868.4	611.2	515.9	653.3	638	610.8	640	359.3	389.1	430.5	246.9	485.4	443.7	275.1	538	603.2

## Sheet: Table S3
	Table S3a.Tukey's test significant results (p<0.05) for between gulfs variation
		diff	lwr	upr	p_adj
surface (F=11.602, p= 2.063e-06)	KV-G	0.183695	0.0908777	0.276512	1.85e-05
	LK_KV	-0.175838	-0.268656	-0.083021	3.71e-05
	KV-K	0.172776	0.0799584	0.265593	4.88e-05
	M_KV	-0.170728	-0.263545	-0.0779102	5.85e-05
	T-G	0.105705	0.0128872	0.198522	0.0179687
	T-LK	0.0978479	0.00503053	0.190665	0.0338476
	S-G	0.100557	0.00210916	0.199005	0.042922
	T-K	0.0947853	0.00196793	0.187603	0.0429904
secchi (F=2.9437, p= 0.02013)	T-K	0.163529	0.00401123	0.323046	0.0415061
2x secchi (F=1.5729, p=0.1934)
Table. S3b. Significant Clusters from Simprof analysis
2xSecchi			Secchi			surface
$significantclusters[[3]]			[1] "KV4_2" "KV5_2a"			[1] "T1_1" "T3_1"
[1] "S2_3" "S3_3"			[1] "T4_2" "T5_2b"			[1] "T4_1" "T5_1"
[1] "T4_3" "T5_3"			[1] "M1_2" "M2_2a" "M2_2b"			[1] "LK3_1" "LK4_1"
[1] "T1_3" "T2_3"			[1] "LK1_2" "LK4_2"			[1] "M1_1" "M2_1" "M5_1"
[1] "KV2_3" "KV5_3"			[1] "LK2_2" "LK3_2b" "LK3_2c"			[1] "M3_1" "M4_1"
[1] "KV3_3" "KV4_3"			[1] "K3_2b" "K3_2a" "K3_2c"			[1] "G2_1" "G4_1"
[1] "LK2_3" "LK4_3"			[1] "G2_2" "G5_2"			[1] "G1_1" "G3_1" "G5_1"
[1] "LK1_3" "LK5_3"						[1] "K1_1" "K2_1"
[1] "M2_3" "M3_3" "M5_3"						[1] "K4_1" "K5_1"
[1] "K3_3" "K4_3"						[1] "S3_1" "S4_1"
[1] "G1_3" "G4_3"						[1] "KV1_1" "KV4_1" "KV5_1"
[1] "G3_3" "G5_3"

## Sheet: Table S4
Table S4. Correlation analysis results for different trophic groups in all depths
surface
Class	Var1	Var2	TICePVal	PearsonR	SpearmanRho	MICe
None	mixo	grazers	0.00642317	0.439561	0.453018	0.568382
None	mixo	parasites	2.99999e-05	0.757708	0.743927	0.731791
None	grazers	parasites	0.00422998	0.495146	0.515661	0.590135
Secchi
Class	Var1	Var2	TICePVal	PearsonR	SpearmanRho	MICe
None	mixo	paras	2.99999e-05	0.720349	0.725722	0.654537

## Sheet: Table S5
Table S5. Taxonomy of abundant, common and rare OTUs and extreme specialists; specialists, generalists and top generalists
	OTUs #	relative abundnace			OTUs #	relative abundnace
abundant	25	0.004995		top-generalists	426	0.0851149
common	60	0.011988		generalists	227	0.0453546
rare	4918	0.982617		specialists	2038	0.407193
				extreme specialists	2314	0.462338
otu	abund	Levin	GB ID	Taxonomy
Otu00059	0.41405	57.7491	EF165142_1_1771_U	Eukaryota;Stramenopiles;Ochrophyta;Chrysophyceae;Chrysophyceae_X;Chrysophyceae_XX;Chrysophyceae_XXX;Chrysophyceae_XXX_sp_;
Otu00034	0.173706	54.2718	EU793923_1_925_U	Eukaryota;Alveolata;Dinoflagellata;Dinophyceae;Dinophyceae_X;Dinophyceae_XX;Dinophyceae_XXX;Dinophyceae_XXX_sp_;
Otu00370	0.223998	53.0796	AY426840_1_1777_U	Eukaryota;Stramenopiles;Ochrophyta;Chrysophyceae;Chrysophyceae_X;Chrysophyceae_Clade-I;Chrysophyceae_Clade-I_X;Chrysophyceae_Clade-I_X_sp_;
Otu00002	3.46661	51.6399	KJ760235_1_1800_U	Eukaryota;Alveolata;Dinoflagellata;Syndiniales;Dino-Group-II;Dino-Group-II-Clade-7;Dino-Group-II-Clade-7_X;Dino-Group-II-Clade-7_X_sp_;
Otu00021	0.979022	51.3046	EF173018_1_1678_U	Eukaryota;Alveolata;Dinoflagellata;Syndiniales;Dino-Group-II;Dino-Group-II-Clade-10-and-11;Dino-Group-II-Clade-10-and-11_X;Dino-Group-II-Clade-10-and-11_X_sp_;
Otu00136	0.102365	50.3792	AY885029_1_1278_U	Eukaryota;Alveolata;Dinoflagellata;Syndiniales;Dino-Group-II;Dino-Group-II-Clade-39;Dino-Group-II-Clade-39_X;Dino-Group-II-Clade-39_X_sp_;
Otu00003	1.27155	49.7098	EF172967_1_1680_U	Eukaryota;Hacrobia;Haptophyta;Prymnesiophyceae;Prymnesiales;Chrysochromulinaceae;Chrysochromulina;Chrysochromulina_sp_;
Otu00325	0.0581226	48.9453	KF130491_1_1763_U	Eukaryota;Hacrobia;Picozoa;Picozoa_X;Picozoa_XX;Picozoa_XXX;Picozoa_XXXX;Picozoa_XXXX_sp_;
Otu00010	0.55479	48.6463	AY665021_1_1747_U	Eukaryota;Alveolata;Dinoflagellata;Syndiniales;Dino-Group-I;Dino-Group-I-Clade-1;Dino-Group-I-Clade-1_X;Dino-Group-I-Clade-1_X_sp_;
Otu00020	0.301137	48.3354	KF129804_1_1756_U	Eukaryota;Hacrobia;Haptophyta;Prymnesiophyceae;Prymnesiales;Chrysochromulinaceae;Chrysochromulina;Chrysochromulina_sp_;
Otu00460	0.0529176	47.5018	KF129714_1_1748_U	Eukaryota;Hacrobia;Telonemia;Telonemia_X;Telonemia_XX;Telonemia-Group-2;Telonemia-Group-2_X;Telonemia-Group-2_X_sp_;
Otu00006	4.8928	47.314	AY665021_1_1747_U	Eukaryota;Alveolata;Dinoflagellata;Syndiniales;Dino-Group-I;Dino-Group-I-Clade-1;Dino-Group-I-Clade-1_X;Dino-Group-I-Clade-1_X_sp_;
Otu00145	0.0497216	47.0865	EF172976_1_1685_U	Eukaryota;Stramenopiles;Opalozoa;MAST-3;MAST-3C;MAST-3C_X;MAST-3C_XX;MAST-3C_XX_sp_;
Otu00074	0.102845	46.9654	KJ758639_1_1806_U	Eukaryota;Alveolata;Dinoflagellata;Syndiniales;Dino-Group-II;Dino-Group-II-Clade-7;Dino-Group-II-Clade-7_X;Dino-Group-II-Clade-7_X_sp_;
Otu00028	1.24601	46.3678	JQ222911_1_1637_U	Eukaryota;Hacrobia;Picozoa;Picozoa_X;Picozoa_XX;Picozoa_XXX;Picozoa_XXXX;Picozoa_XXXX_sp_;
Otu00075	0.807941	45.7384	KC488427_1_1686_U	Eukaryota;Alveolata;Dinoflagellata;Dinophyceae;Dinophyceae_X;Dinophyceae_XX;Dinophyceae_XXX;Dinophyceae_XXX_sp_;
Otu00461	0.0665237	45.3852	KF130174_1_1767_U	Eukaryota;Hacrobia;Centroheliozoa;Centroheliozoa_X;Pterocystida;Pterocystida_X;Pterocystida_XX;Pterocystida_XX_sp_;
Otu00187	0.156128	45.367	HQ219364_1_1769_U	Eukaryota;Stramenopiles;Opalozoa;MAST-12;MAST-12A;MAST-12A_X;MAST-12A_XX;MAST-12A_XX_sp_;
Otu00161	0.0747878	45.1106	HQ394104_1_804_U	Eukaryota;Alveolata;Ciliophora;Spirotrichea;Strombidiida;Strombidiidae_L;Strombidiidae_L_X;Strombidiidae_L_X_sp_;
Otu00378	0.403069	45.0437	KF130208_1_1761_U	Eukaryota;Alveolata;Dinoflagellata;Dinophyceae;Dinophyceae_X;Dinophyceae_XX;Dinophyceae_XXX;Dinophyceae_XXX_sp_;
Otu00070	0.373642	44.6919	DQ310254_1_1803_U	Eukaryota;Alveolata;Dinoflagellata;Dinophyceae;Suessiales;Suessiaceae;Suessiaceae_X;Suessiaceae_X_sp_;
Otu00125	0.0919552	44.5518	KJ763317_1_1766_U	Eukaryota;Alveolata;Ciliophora;Spirotrichea;Strombidiida;Strombidiidae_L;Strombidiidae_L_X;Strombidiidae_L_X_sp_;
Otu00106	0.0499042	44.5142	AM490987_1_1722_U	Eukaryota;Hacrobia;Haptophyta;Prymnesiophyceae;Syracosphaerales;Syracosphaeraceae;Syracosphaera;Syracosphaera_pulchra;
Otu00426	0.0351795	44.2221	KJ759731_1_1795_U	Eukaryota;Alveolata;Dinoflagellata;Syndiniales;Dino-Group-II;Dino-Group-II-Clade-3;Dino-Group-II-Clade-3_X;Dino-Group-II-Clade-3_X_sp_;
Otu00268	0.0985528	43.7983	AB058360_1_1755_U	Eukaryota;Hacrobia;Haptophyta;Prymnesiophyceae;Isochrysidales;Noelaerhabdaceae;Gephyrocapsa;Gephyrocapsa_oceanica;
Otu00038	0.0460004	43.5138	AY665019_1_1747_U	Eukaryota;Alveolata;Dinoflagellata;Syndiniales;Dino-Group-I;Dino-Group-I-Clade-1;Dino-Group-I-Clade-1_X;Dino-Group-I-Clade-1_X_sp_;
Otu00189	0.266574	43.3032	KC583024_1_1778_U	Eukaryota;Stramenopiles;Ochrophyta;Chrysophyceae;Chrysophyceae_X;Chrysophyceae_Clade-G;Chrysophyceae_Clade-G_X;Chrysophyceae_Clade-G_X_sp_;
Otu00194	0.0522556	42.9402	AY485497_1_1617_U	Eukaryota;Stramenopiles;Ochrophyta;Bacillariophyta;Bacillariophyta_X;Raphid-pennate;Amphiprora;Amphiprora_alata;
Otu00051	0.582961	42.9182	KF130184_1_1758_U	Eukaryota;Alveolata;Dinoflagellata;Syndiniales;Dino-Group-II;Dino-Group-II_X;Dino-Group-II_XX;Dino-Group-II_XX_sp_;
Otu00175	0.100904	42.8518	KC582954_1_1787_U	Eukaryota;Alveolata;Dinoflagellata;Syndiniales;Dino-Group-II;Dino-Group-II-Clade-39;Dino-Group-II-Clade-39_X;Dino-Group-II-Clade-39_X_sp_;
Otu00234	0.143526	42.6985	KF130491_1_1763_U	Eukaryota;Hacrobia;Picozoa;Picozoa_X;Picozoa_XX;Picozoa_XXX;Picozoa_XXXX;Picozoa_XXXX_sp_;
Otu00016	3.31772	42.5465	HQ394099_1_841_U	Eukaryota;Stramenopiles;Ochrophyta;Bacillariophyta;Bacillariophyta_X;Radial-centric-basal-Coscinodiscophyceae;Leptocylindrus;Leptocylindrus_sp_;
Otu00217	0.0258881	41.9288	AM491014_1_1723_U	Eukaryota;Hacrobia;Haptophyta;Prymnesiophyceae;Prymnesiales;Prymnesiaceae;Dicrateria;Dicrateria_rotunda;
Otu00095	0.0107753	41.5952	HQ219364_1_1769_U	Eukaryota;Stramenopiles;Opalozoa;MAST-12;MAST-12A;MAST-12A_X;MAST-12A_XX;MAST-12A_XX_sp_;
Otu00372	0.20505	40.9876	KF130163_1_1755_U	Eukaryota;Stramenopiles;Sagenista;MAST-7;MAST-7D;MAST-7D_X;MAST-7D_XX;MAST-7D_XX_sp_;
Otu00032	1.10981	40.7063	DQ647517_1_1764_U	Eukaryota;Alveolata;Ciliophora;Spirotrichea;Strombidiida;Tontoniidae_B;Tontoniidae_B_X;Tontoniidae_B_X_sp_;
Otu00067	0.227537	40.651	EU143530_1_909_U	Eukaryota;Archaeplastida;Chlorophyta;Pyramimonadophyceae;Pyramimonadales;Pterospermaceae;Pterosperma;Pterosperma_sp_;
Otu00080	0.144256	40.4802	HQ394099_1_841_U	Eukaryota;Stramenopiles;Ochrophyta;Bacillariophyta;Bacillariophyta_X;Radial-centric-basal-Coscinodiscophyceae;Leptocylindrus;Leptocylindrus_sp_;
Otu00005	1.7692	40.3911	AB686255_1_1713_U	Eukaryota;Alveolata;Dinoflagellata;Dinophyceae;Gymnodiniales;Gymnodiniaceae;Lepidodinium;Lepidodinium_sp_;
Otu00043	0.0498129	40.3171	AY665021_1_1747_U	Eukaryota;Alveolata;Dinoflagellata;Syndiniales;Dino-Group-I;Dino-Group-I-Clade-1;Dino-Group-I-Clade-1_X;Dino-Group-I-Clade-1_X_sp_;
Otu00081	0.111017	40.0672	GQ995337_1_1775_U	Eukaryota;Opisthokonta;Fungi;Chytridiomycota;Chytridiomycotina;Chytridiomycetes;Spizellomycetales-and-Rhizophlyctidales;Spizellomycetales-and-Rhizophlyctidales_sp_;
Otu00061	0.196238	39.9048	KF130023_1_1761_U	Eukaryota;Alveolata;Dinoflagellata;Syndiniales;Dino-Group-II;Dino-Group-II-Clade-10-and-11;Dino-Group-II-Clade-10-and-11_X;Dino-Group-II-Clade-10-and-11_X_sp_;
Otu00024	0.221738	39.9039	KJ762877_1_1800_U	Eukaryota;Alveolata;Dinoflagellata;Dinophyceae;Dinophyceae_X;Dinophyceae_XX;Dinophyceae_XXX;Dinophyceae_XXX_sp_;
Otu00197	0.19327	39.6248	KC583000_1_2021_U	Eukaryota;Stramenopiles;Ochrophyta;Chrysophyceae;Chrysophyceae_X;Chrysophyceae_Clade-H;Chrysophyceae_Clade-H_X;Chrysophyceae_Clade-H_X_sp_;
Otu00053	0.0992376	39.6213	HM067005_1_1741_U	Eukaryota;Alveolata;Dinoflagellata;Dinophyceae;Gymnodiniales;Kareniaceae;Karenia;Karenia_papilionacea;
Otu00096	0.757352	39.3765	HQ912651_1_1660_U	Eukaryota;Stramenopiles;Ochrophyta;Bacillariophyta;Bacillariophyta_X;Radial-centric-basal-Coscinodiscophyceae;Guinardia;Guinardia_delicatula;
Otu00050	0.0284906	39.3667	JQ222911_1_1637_U	Eukaryota;Hacrobia;Picozoa;Picozoa_X;Picozoa_XX;Picozoa_XXX;Picozoa_XXXX;Picozoa_XXXX_sp_;
Otu00014	2.61479	39.2884	KF130275_1_1762_U	Eukaryota;Alveolata;Dinoflagellata;Syndiniales;Dino-Group-III;Dino-Group-III_X;Dino-Group-III_XX;Dino-Group-III_XX_sp_;
Otu00073	0.0686925	38.7813	HQ394099_1_841_U	Eukaryota;Stramenopiles;Ochrophyta;Bacillariophyta;Bacillariophyta_X;Radial-centric-basal-Coscinodiscophyceae;Leptocylindrus;Leptocylindrus_sp_;
Otu00036	0.0429642	38.774	HQ394014_1_865_U	Eukaryota;Hacrobia;Picozoa;Picozoa_X;Picozoa_XX;Picozoa_XXX;Picozoa_XXXX;Picozoa_XXXX_sp_;
Otu00089	0.745664	38.664	HQ394157_1_839_U	Eukaryota;Stramenopiles;Ochrophyta;Bacillariophyta;Bacillariophyta_X;Polar-centric-Mediophyceae;Eucampia;Eucampia_sp_;
Otu00178	0.139325	38.4876	EF432540_1_1702_U	Eukaryota;Opisthokonta;Choanoflagellida;Choanoflagellatea;Acanthoecida;Stephanoecidae_Group_E;Stephanoecidae_Group_E_X;Stephanoecidae_Group_E_X_sp_;
Otu00251	0.0247466	38.393	KJ763783_1_1801_U	Eukaryota;Alveolata;Dinoflagellata;Syndiniales;Dino-Group-II;Dino-Group-II-Clade-10-and-11;Dino-Group-II-Clade-10-and-11_X;Dino-Group-II-Clade-10-and-11_X_sp_;
Otu00088	0.0395398	38.3688	KJ759387_1_1799_U	Eukaryota;Alveolata;Dinoflagellata;Syndiniales;Dino-Group-III;Dino-Group-III_X;Dino-Group-III_XX;Dino-Group-III_XX_sp_;
Otu00009	0.592275	38.2105	AM491002_1_1680_U	Eukaryota;Hacrobia;Haptophyta;Prymnesiophyceae;Prymnesiales;Prymnesiaceae;Prymnesium;Prymnesium_sp_;
Otu00162	0.406151	37.6132	EF526783_1_1343_U	Eukaryota;Alveolata;Dinoflagellata;Dinophyceae;Peridiniales;Heterocapsaceae;Heterocapsa;Heterocapsa_nei/rotundata;
Otu00272	0.0602229	37.3764	KC488357_1_1681_U	Eukaryota;Opisthokonta;Choanoflagellida;Choanoflagellatea;Acanthoecida;Stephanoecidae_Group_D;Stephanoecidae_Group_D_X;Stephanoecidae_Group_D_X_sp_;
Otu00077	0.0125331	37.3252	KJ759496_1_1802_U	Eukaryota;Stramenopiles;Ochrophyta;Bolidophyceae;Parmales;Triparmaceae;Triparma;Triparma_mediterranea;
Otu00420	0.0387408	37.1526	AF167153_1_1799_U	Eukaryota;Stramenopiles;Ochrophyta;Bolidophyceae;Parmales;Triparmaceae;Triparma;Triparma_eleuthera;
Otu01049	0.015615	37.0785	AY116221_1_1791_U	Eukaryota;Stramenopiles;Opalozoa;MAST-3;MAST-3J;MAST-3J_X;MAST-3J_XX;MAST-3J_XX_sp_;
Otu00283	0.0370971	36.6759	KF130586_1_1759_U	Eukaryota;Alveolata;Dinoflagellata;Syndiniales;Dino-Group-II;Dino-Group-II-Clade-3;Dino-Group-II-Clade-3_X;Dino-Group-II-Clade-3_X_sp_;
Otu00143	0.346339	36.628	KC582994_1_1780_U	Eukaryota;Stramenopiles;Ochrophyta;Chrysophyceae;Chrysophyceae_X;Chrysophyceae_Clade-H;Chrysophyceae_Clade-H_X;Chrysophyceae_Clade-H_X_sp_;
Otu00141	0.0518903	36.0572	EF172967_1_1680_U	Eukaryota;Hacrobia;Haptophyta;Prymnesiophyceae;Prymnesiales;Chrysochromulinaceae;Chrysochromulina;Chrysochromulina_sp_;
Otu00154	0.0749476	35.9043	AY426848_1_1787_U	Eukaryota;Opisthokonta;Choanoflagellida;Choanoflagellatea;Acanthoecida;Stephanoecidae_Group_D;Stephanoecidae_Group_D_X;Stephanoecidae_Group_D_X_sp_;
Otu00069	0.0429185	35.891	KJ763160_1_1804_U	Eukaryota;Alveolata;Dinoflagellata;Dinophyceae;Dinophyceae_X;Dinophyceae_XX;Dinophyceae_XXX;Dinophyceae_XXX_sp_;
Otu00030	0.208817	35.7368	HQ394082_1_831_U	Eukaryota;Archaeplastida;Chlorophyta;Pyramimonadophyceae;Pyramimonadales;Pterospermaceae;Pterosperma;Pterosperma_sp_;
Otu00510	0.0349284	35.6975	JQ782091_1_1763_U	Eukaryota;Stramenopiles;Sagenista;MAST-8;MAST-8B;MAST-8B_X;MAST-8B_XX;MAST-8B_XX_sp_;
Otu00063	0.0197699	35.6646	KF130519_1_1757_U	Eukaryota;Alveolata;Dinoflagellata;Syndiniales;Dino-Group-II;Dino-Group-II-Clade-10-and-11;Dino-Group-II-Clade-10-and-11_X;Dino-Group-II-Clade-10-and-11_X_sp_;
Otu00055	0.594033	35.6615	AM503930_1_1801_U	Eukaryota;Alveolata;Dinoflagellata;Dinophyceae;Gymnodiniales;Gymnodiniaceae;Gyrodinium;Gyrodinium_dominans;
Otu00171	0.0644691	35.4053	KF130061_1_1763_U	Eukaryota;Hacrobia;Centroheliozoa;Centroheliozoa_X;Pterocystida;Pterocystida_X;Pterocystida_XX;Pterocystida_XX_sp_;
Otu00391	0.0240618	35.3615	EF526910_1_1345_U	Eukaryota;Alveolata;Dinoflagellata;Dinophyceae;Dinophyceae_X;Dinophyceae_XX;Dinophyceae_XXX;Dinophyceae_XXX_sp_;
Otu00203	0.047119	35.1876	KJ758831_1_1790_U	Eukaryota;Opisthokonta;Fungi;Chytridiomycota;Chytridiomycotina;Chytridiomycetes;Spizellomycetales-and-Rhizophlyctidales;Spizellomycetales-and-Rhizophlyctidales_sp_;
Otu00323	0.0358644	34.8638	AJ402351_1_1758_U	Eukaryota;Hacrobia;Haptophyta;Prymnesiophyceae;Prymnesiophyceae_X;Prymnesiophyceae_XX;Prymnesiophyceae_XXX;Prymnesiophyceae_XXX_sp_;
Otu00491	0.0894668	34.6298	HQ394099_1_841_U	Eukaryota;Stramenopiles;Ochrophyta;Bacillariophyta;Bacillariophyta_X;Radial-centric-basal-Coscinodiscophyceae;Leptocylindrus;Leptocylindrus_sp_;
Otu00328	0.10426	34.4488	KJ759496_1_1802_U	Eukaryota;Stramenopiles;Ochrophyta;Bolidophyceae;Parmales;Triparmaceae;Triparma;Triparma_mediterranea;
Otu00573	0.0458406	34.3763	KF129684_1_1759_U	Eukaryota;Alveolata;Dinoflagellata;Syndiniales;Dino-Group-II;Dino-Group-II-Clade-10-and-11;Dino-Group-II-Clade-10-and-11_X;Dino-Group-II-Clade-10-and-11_X_sp_;
Otu00837	0.0149073	34.1209	EU143421_1_891_U	Eukaryota;Archaeplastida;Chlorophyta;Mamiellophyceae;Mamiellales;Mamiellaceae;Mamiella;Mamiella_gilva;
Otu00092	0.288399	33.991	HQ393985_1_819_U	Eukaryota;Alveolata;Dinoflagellata;Dinophyceae;Dinophyceae_X;Dinophyceae_XX;Dinophyceae_XXX;Dinophyceae_XXX_sp_;
Otu00335	0.087846	33.9076	KC582944_1_1792_U	Eukaryota;Alveolata;Dinoflagellata;Syndiniales;Dino-Group-II;Dino-Group-II_X;Dino-Group-II_XX;Dino-Group-II_XX_sp_;
Otu00186	0.156447	33.8687	FJ176219_1_1688_U	Eukaryota;Opisthokonta;Fungi;Chytridiomycota;Chytridiomycotina;Chytridiomycetes;Spizellomycetales-and-Rhizophlyctidales;Spizellomycetales-and-Rhizophlyctidales_sp_;
Otu00244	0.0649713	33.8422	MG972211_1_1717_U	Eukaryota;Stramenopiles;Ochrophyta;Bacillariophyta;Bacillariophyta_X;Polar-centric-Mediophyceae;Chaetoceros;Chaetoceros_atlanticus;
Otu00044	0.340563	33.579	KC814811_1_1731_U	Eukaryota;Stramenopiles;Ochrophyta;Bacillariophyta;Bacillariophyta_X;Radial-centric-basal-Coscinodiscophyceae;Leptocylindrus;Leptocylindrus_convexus;
Otu00085	0.0274176	33.5668	KJ759432_1_1798_U	Eukaryota;Alveolata;Dinoflagellata;Syndiniales;Dino-Group-III;Dino-Group-III_X;Dino-Group-III_XX;Dino-Group-III_XX_sp_;
Otu00090	0.425304	33.3852	AY426842_1_1779_U	Eukaryota;Opisthokonta;Choanoflagellida;Choanoflagellatea;Craspedida;Monosigidae_Group_B;Monosigidae_Group_B_X;Monosigidae_Group_B_X_sp_;
Otu00083	0.199343	32.857	JX413558_1_1637_U	Eukaryota;Stramenopiles;Stramenopiles_X;Stramenopiles_X-Group-7;Stramenopiles_X-Group-7_X;Stramenopiles_X-Group-7_XX;Stramenopiles_X-Group-7_XXX;Stramenopiles_X-Group-7_XXX_sp_;
Otu00236	0.0487856	32.8377	AY129045_1_1794_U	Eukaryota;Alveolata;Dinoflagellata;Syndiniales;Dino-Group-II;Dino-Group-II-Clade-14;Dino-Group-II-Clade-14_X;Dino-Group-II-Clade-14_X_sp_;
Otu00396	0.00570725	32.7225	HQ394099_1_841_U	Eukaryota;Stramenopiles;Ochrophyta;Bacillariophyta;Bacillariophyta_X;Radial-centric-basal-Coscinodiscophyceae;Leptocylindrus;Leptocylindrus_sp_;
Otu00031	2.64227	32.6976	KC814811_1_1731_U	Eukaryota;Stramenopiles;Ochrophyta;Bacillariophyta;Bacillariophyta_X;Radial-centric-basal-Coscinodiscophyceae;Leptocylindrus;Leptocylindrus_convexus;
Otu00208	0.0384212	32.647	AY426842_1_1779_U	Eukaryota;Opisthokonta;Choanoflagellida;Choanoflagellatea;Craspedida;Monosigidae_Group_B;Monosigidae_Group_B_X;Monosigidae_Group_B_X_sp_;
Otu00682	0.0206146	32.6359	AM491000_1_1723_U	Eukaryota;Hacrobia;Haptophyta;Prymnesiophyceae;Prymnesiales;Prymnesiaceae;Prymnesium;Prymnesium_sp_;
Otu00007	1.11947	32.5774	AY664921_1_1754_U	Eukaryota;Alveolata;Dinoflagellata;Dinophyceae;Prorocentrales;Prorocentraceae;Prorocentrum;Prorocentrum_sp_;
Otu00743	0.0117113	32.5664	AM418563_1_1798_U	Eukaryota;Hacrobia;Telonemia;Telonemia_X;Telonemia_XX;Telonemia-Group-2;Telonemia-Group-2_X;Telonemia-Group-2_X_sp_;
Otu00079	0.054333	32.5615	KJ925263_1_1690_U	Eukaryota;Alveolata;Dinoflagellata;Syndiniales;Dino-Group-II;Dino-Group-II-Clade-10-and-11;Dino-Group-II-Clade-10-and-11_X;Dino-Group-II-Clade-10-and-11_X_sp_;
Otu00040	0.153068	32.3918	EF526881_1_1802_U	Eukaryota;Alveolata;Dinoflagellata;Dinophyceae;Dinophyceae_X;Dinophyceae_XX;Dinophyceae_XXX;Dinophyceae_XXX_sp_;
Otu00060	0.0917726	32.346	EU333070_1_800_U	Eukaryota;Stramenopiles;Ochrophyta;MOCH-2;MOCH-2_X;MOCH-2_XX;MOCH-2_XXX;MOCH-2_XXX_sp_;
Otu00037	2.16179	32.2675	AB246746_1_1727_U	Eukaryota;Stramenopiles;Ochrophyta;Bacillariophyta;Bacillariophyta_X;Polar-centric-Mediophyceae;Chaetoceros;Chaetoceros_sp_P__quinquecorne_endosymbiont;
Otu00584	0.0200439	32.2114	KF129680_1_1771_U	Eukaryota;Stramenopiles;Opalozoa;MAST-3;MAST-3A;MAST-3A_X;MAST-3A_XX;MAST-3A_XX_sp_;
Otu00169	0.0349969	31.8531	KC488440_1_1711_U	Eukaryota;Alveolata;Dinoflagellata;Dinophyceae;Dinophyceae_X;Dinophyceae_XX;Dinophyceae_XXX;Dinophyceae_XXX_sp_;
Otu00512	0.00566159	31.6704	AJ564770_1_1795_U	Eukaryota;Hacrobia;Telonemia;Telonemia_X;Telonemia_XX;Telonemia-Group-1;Telonemia-Group-1_X;Telonemia-Group-1_X_sp_;
Otu00417	0.141722	31.6273	KJ758041_1_1796_U	Eukaryota;Alveolata;Dinoflagellata;Dinophyceae;Dinophyceae_X;Dinophyceae_XX;Dinophyceae_XXX;Dinophyceae_XXX_sp_;
Otu00076	0.0066889	31.597	KF130491_1_1763_U	Eukaryota;Hacrobia;Picozoa;Picozoa_X;Picozoa_XX;Picozoa_XXX;Picozoa_XXXX;Picozoa_XXXX_sp_;
Otu00192	0.0540362	31.5383	EU143423_1_890_U	Eukaryota;Archaeplastida;Chlorophyta;Mamiellophyceae;Mamiellales;Mamiellaceae;Mamiella;Mamiella_gilva;
Otu00026	1.40796	31.5092	AM491021_1_1787_U	Eukaryota;Hacrobia;Haptophyta;Prymnesiophyceae;Prymnesiales;Chrysochromulinaceae;Chrysochromulina;Chrysochromulina_simplex;
Otu00093	0.0317551	31.2799	EU780618_1_1706_U	Eukaryota;Alveolata;Dinoflagellata;Dinophyceae;Dinophyceae_X;Dinophyceae_XX;Dinophyceae_XXX;Dinophyceae_XXX_sp_;
Otu00402	0.00655192	31.2359	KJ759335_1_1800_U	Eukaryota;Alveolata;Dinoflagellata;Syndiniales;Dino-Group-II;Dino-Group-II-Clade-7;Dino-Group-II-Clade-7_X;Dino-Group-II-Clade-7_X_sp_;
Otu00183	0.276048	31.2323	AY129057_1_1798_U	Eukaryota;Alveolata;Dinoflagellata;Syndiniales;Dino-Group-II;Dino-Group-II-Clade-10-and-11;Dino-Group-II-Clade-10-and-11_X;Dino-Group-II-Clade-10-and-11_X_sp_;
Otu00892	0.0118939	31.1393	AB178868_1_1755_U	Eukaryota;Stramenopiles;Pseudofungi;Oomycota;Oomycota_X;Haliphthorales;Haliphthoros;Haliphthoros_milfordensis;
Otu00276	0.00707699	30.4499	JQ781950_1_1809_U	Eukaryota;Stramenopiles;Opalozoa;MAST-3;MAST-3E;MAST-3E_X;MAST-3E_XX;MAST-3E_XX_sp_;
Otu00292	0.00862936	30.4267	KJ763013_1_1799_U	Eukaryota;Alveolata;Dinoflagellata;Syndiniales;Dino-Group-II;Dino-Group-II-Clade-12;Dino-Group-II-Clade-12_X;Dino-Group-II-Clade-12_X_sp_;
Otu00639	0.0280568	30.3234	JQ226527_1_1594_U	Eukaryota;Opisthokonta;Choanoflagellida;Choanoflagellida_X;Choanoflagellida_XX;Choanoflagellida_XX_Clade-3;Choanoflagellida_XX_Clade-3_X;Choanoflagellida_XX_Clade-3_X_sp_;
Otu00529	0.0351795	30.3222	AB430611_1_1773_U	Eukaryota;Stramenopiles;Ochrophyta;Bacillariophyta;Bacillariophyta_X;Araphid-pennate;Thalassiothrix;Thalassiothrix_longissima;
Otu00122	0.00600403	30.139	KF130061_1_1763_U	Eukaryota;Hacrobia;Centroheliozoa;Centroheliozoa_X;Pterocystida;Pterocystida_X;Pterocystida_XX;Pterocystida_XX_sp_;
Otu00045	0.716671	30.1228	AY425318_1_1734_U	Eukaryota;Archaeplastida;Chlorophyta;Mamiellophyceae;Mamiellales;Mamiellaceae;Micromonas;Micromonas_clade_B4;
Otu00200	0.0233997	30.0016	EU793934_1_941_U	Eukaryota;Alveolata;Dinoflagellata;Dinophyceae;Dinophyceae_X;Dinophyceae_XX;Dinophyceae_XXX;Dinophyceae_XXX_sp_;
Otu00048	0.261483	29.8393	GQ863817_1_1709_U	Eukaryota;Hacrobia;Haptophyta;Prymnesiophyceae;Phaeocystales;Phaeocystaceae;Phaeocystis;Phaeocystis_sp_;
Otu00298	0.0299973	29.7977	EU333058_1_800_U	Eukaryota;Alveolata;Dinoflagellata;Syndiniales;Dino-Group-II;Dino-Group-II-Clade-5;Dino-Group-II-Clade-5_X;Dino-Group-II-Clade-5_X_sp_;
Otu00110	0.00888048	29.7116	KC911773_1_831_U	Eukaryota;Alveolata;Dinoflagellata;Syndiniales;Dino-Group-I;Dino-Group-I-Clade-1;Dino-Group-I-Clade-1_X;Dino-Group-I-Clade-1_X_sp_;
Otu00237	0.00518218	29.5634	AB183628_1_1747_U	Eukaryota;Archaeplastida;Chlorophyta;Mamiellophyceae;Dolichomastigales;Crustomastigaceae;Crustomastix;Crustomastix_didyma;
Otu00245	0.014291	29.5622	GQ365836_1_1545_U	Eukaryota;Hacrobia;Telonemia;Telonemia_X;Telonemia_XX;Telonemia-Group-2;Telonemia-Group-2_X;Telonemia-Group-2_X_sp_;
Otu00594	0.0384669	29.4419	JX188322_1_1754_U	Eukaryota;Stramenopiles;Sagenista;MAST-9;MAST-9D;MAST-9D_X;MAST-9D_XX;MAST-9D_XX_sp_;
Otu00249	0.0457721	29.4285	KF130040_1_1763_U	Eukaryota;Hacrobia;Picozoa;Picozoa_X;Picozoa_XX;Picozoa_XXX;Picozoa_XXXX;Picozoa_XXXX_sp_;
Otu00458	0.0756781	29.3951	KC583027_1_1771_U	Eukaryota;Stramenopiles;Ochrophyta;Chrysophyceae;Chrysophyceae_X;Chrysophyceae_Clade-I;Chrysophyceae_Clade-I_X;Chrysophyceae_Clade-I_X_sp_;
Otu00868	0.0174642	29.2247	JF714228_1_1777_U	Eukaryota;Hacrobia;Haptophyta;Pavlovophyceae;Pavlovales;Pavlovaceae;Exanthemachrysis;Exanthemachrysis_sp_;
Otu00018	0.826684	29.1122	KJ763295_1_1800_U	Eukaryota;Alveolata;Dinoflagellata;Dinophyceae;Gonyaulacales;Ceratiaceae;Tripos;Tripos_fusus;
Otu00279	0.0287874	29.064	AB042204_1_1811_U	Eukaryota;Stramenopiles;Ochrophyta;Pinguiophyceae;Pinguiochrysidales;Pinguiochrysidaceae;Phaeomonas;Phaeomonas_parva;
Otu00744	0.00461146	28.939	EU333099_1_800_U	Eukaryota;Alveolata;Dinoflagellata;Syndiniales;Dino-Group-II;Dino-Group-II-Clade-10-and-11;Dino-Group-II-Clade-10-and-11_X;Dino-Group-II-Clade-10-and-11_X_sp_;
Otu00649	0.0345631	28.9214	EU446341_1_1537_U	Eukaryota;Opisthokonta;Choanoflagellida;Choanoflagellatea;Acanthoecida;Stephanoecidae_Group_I;Stephanoecidae_Group_I_X;Stephanoecidae_Group_I_X_sp_;
Otu00690	0.0106155	28.8646	KJ763257_1_1812_U	Eukaryota;Stramenopiles;Opalozoa;MAST-3;MAST-3D;MAST-3D_X;MAST-3D_XX;MAST-3D_XX_sp_;
Otu00434	0.15074	28.8367	AB275037_1_1702_U	Eukaryota;Stramenopiles;Pseudofungi;MAST-1;MAST-1C;MAST-1C_X;MAST-1C_XX;MAST-1C_XX_sp_;
Otu00121	0.0820702	28.8108	AY129038_1_1800_U	Eukaryota;Alveolata;Dinoflagellata;Syndiniales;Dino-Group-II;Dino-Group-II-Clade-3;Dino-Group-II-Clade-3_X;Dino-Group-II-Clade-3_X_sp_;
Otu00046	0.409301	28.7882	AJ415519_1_1755_U	Eukaryota;Alveolata;Dinoflagellata;Dinophyceae;Prorocentrales;Prorocentraceae;Prorocentrum;Prorocentrum_micans;
Otu00112	0.338463	28.677	AY251287_1_1745_U	Eukaryota;Alveolata;Dinoflagellata;Dinophyceae;Dinophyceae_X;Dinophyceae_XX;Dinophyceae_XXX;Dinophyceae_XXX_sp_;
Otu00114	0.0740116	28.5768	DQ647511_1_1763_U	Eukaryota;Stramenopiles;Ochrophyta;Chrysophyceae;Chrysophyceae_X;Chrysophyceae_Clade-G;Chrysophyceae_Clade-G_X;Chrysophyceae_Clade-G_X_sp_;
Otu00454	0.071295	28.2435	EU793699_1_905_U	Eukaryota;Alveolata;Dinoflagellata;Syndiniales;Dino-Group-I;Dino-Group-I-Clade-1;Dino-Group-I-Clade-1_X;Dino-Group-I-Clade-1_X_sp_;
Otu00131	0.178683	28.0627	AY426845_1_1789_U	Eukaryota;Opisthokonta;Choanoflagellida;Choanoflagellatea;Acanthoecida;Stephanoecidae_Group_E;Stephanoecidae_Group_E_X;Stephanoecidae_Group_E_X_sp_;
Otu00438	0.0743084	28.0503	AY129040_1_1796_U	Eukaryota;Alveolata;Dinoflagellata;Syndiniales;Dino-Group-II;Dino-Group-II-Clade-2;Dino-Group-II-Clade-2_X;Dino-Group-II-Clade-2_X_sp_;
Otu00261	0.0172587	27.9425	KF130179_1_1757_U	Eukaryota;Alveolata;Dinoflagellata;Syndiniales;Dino-Group-II;Dino-Group-II-Clade-3;Dino-Group-II-Clade-3_X;Dino-Group-II-Clade-3_X_sp_;
Otu01470	0.00223724	27.9186	HQ394099_1_841_U	Eukaryota;Stramenopiles;Ochrophyta;Bacillariophyta;Bacillariophyta_X;Radial-centric-basal-Coscinodiscophyceae;Leptocylindrus;Leptocylindrus_sp_;
Otu00972	0.00967949	27.6238	EU143481_1_898_U	Eukaryota;Archaeplastida;Prasinodermophyta;Prasinodermophyceae;Prasinodermales;Prasinodermaceae;Prasinodermaceae_X;Prasinodermaceae_X_sp_;
Otu01402	0.0572095	27.4972	KJ757712_1_1793_U	Eukaryota;Opisthokonta;Metazoa;Cnidaria;Cnidaria_X;Hydrozoa;Hydrozoa_X;Hydrozoa_X_sp_;
Otu00547	0.0139713	27.391	KJ759520_1_1797_U	Eukaryota;Alveolata;Dinoflagellata;Syndiniales;Dino-Group-II;Dino-Group-II-Clade-1;Dino-Group-II-Clade-1_X;Dino-Group-II-Clade-1_X_sp_;
Otu01085	0.0059812	27.3047	JQ222940_1_1629_U	Eukaryota;Alveolata;Dinoflagellata;Syndiniales;Dino-Group-II;Dino-Group-II-Clade-30;Dino-Group-II-Clade-30_X;Dino-Group-II-Clade-30_X_sp_;
Otu00260	0.148206	27.2723	JN832730_1_1677_U	Eukaryota;Alveolata;Ciliophora;Spirotrichea;Strombidiida;Strombidiidae_Q;Strombidiidae_Q_X;Strombidiidae_Q_X_sp_;
Otu00757	0.0157977	27.2639	KC488440_1_1711_U	Eukaryota;Alveolata;Dinoflagellata;Dinophyceae;Dinophyceae_X;Dinophyceae_XX;Dinophyceae_XXX;Dinophyceae_XXX_sp_;
Otu00163	0.00367547	27.2566	KF130519_1_1757_U	Eukaryota;Alveolata;Dinoflagellata;Syndiniales;Dino-Group-II;Dino-Group-II-Clade-10-and-11;Dino-Group-II-Clade-10-and-11_X;Dino-Group-II-Clade-10-and-11_X_sp_;
Otu00951	0.00483975	27.2388	HQ394137_1_785_U	Eukaryota;Alveolata;Ciliophora;Phyllopharyngea;Cyrtophoria_1;PHYLL_4;PHYLL_4_X;PHYLL_4_X_sp_;
Otu00198	0.00794449	27.129	JX413558_1_1637_U	Eukaryota;Stramenopiles;Stramenopiles_X;Stramenopiles_X-Group-7;Stramenopiles_X-Group-7_X;Stramenopiles_X-Group-7_XX;Stramenopiles_X-Group-7_XXX;Stramenopiles_X-Group-7_XXX_sp_;
Otu00523	0.0189481	27.122	KJ760358_1_1800_U	Eukaryota;Alveolata;Dinoflagellata;Syndiniales;Dino-Group-II;Dino-Group-II-Clade-15;Dino-Group-II-Clade-15_X;Dino-Group-II-Clade-15_X_sp_;
Otu00103	0.418204	27.1016	KJ763099_1_1781_U	Eukaryota;Opisthokonta;Choanoflagellida;Choanoflagellatea;Acanthoecida;Stephanoecidae_Group_H;Stephanoecidae_Group_H_X;Stephanoecidae_Group_H_X_sp_;
Otu00117	0.0226464	27.0704	AB246746_1_1727_U	Eukaryota;Stramenopiles;Ochrophyta;Bacillariophyta;Bacillariophyta_X;Polar-centric-Mediophyceae;Chaetoceros;Chaetoceros_sp_P__quinquecorne_endosymbiont;
Otu00012	2.01073	27.0271	AY664942_1_1755_U	Eukaryota;Alveolata;Dinoflagellata;Dinophyceae;Dinophyceae_X;Dinophyceae_XX;Dinophyceae_XXX;Dinophyceae_XXX_sp_;
Otu00220	0.00241987	27.0096	KF129842_1_1759_U	Eukaryota;Alveolata;Dinoflagellata;Syndiniales;Dino-Group-II;Dino-Group-II-Clade-10-and-11;Dino-Group-II-Clade-10-and-11_X;Dino-Group-II-Clade-10-and-11_X_sp_;
Otu00098	0.116451	26.9852	AB058377_1_1748_U	Eukaryota;Archaeplastida;Chlorophyta;Pyramimonadophyceae;Pseudoscourfieldiales;Pycnococcaceae;Pycnococcaceae-clade1;Pycnococcaceae-clade1-sp_;
Otu00339	0.0394713	26.9564	AY143564_1_1696_U	Eukaryota;Alveolata;Ciliophora;Spirotrichea;Strombidiida;Strombidiidae;Strombidium;Strombidium_sp_;
Otu00270	0.0592184	26.9524	KJ763214_1_1797_U	Eukaryota;Alveolata;Dinoflagellata;Syndiniales;Dino-Group-II;Dino-Group-II-Clade-26;Dino-Group-II-Clade-26_X;Dino-Group-II-Clade-26_X_sp_;
Otu00312	0.0397681	26.8256	JQ782039_1_1804_U	Eukaryota;Stramenopiles;Opalozoa;MAST-3;MAST-3F;MAST-3F_X;MAST-3F_XX;MAST-3F_XX_sp_;
Otu00866	0.00467994	26.5813	KC488615_1_1677_U	Eukaryota;Hacrobia;Telonemia;Telonemia_X;Telonemia_XX;Telonemia-Group-2;Telonemia-Group-2_X;Telonemia-Group-2_X_sp_;
Otu00467	0.0206602	26.546	EF165139_1_1755_U	Eukaryota;Stramenopiles;Ochrophyta;Chrysophyceae;Chrysophyceae_X;Chrysophyceae_XX;Chrysophyceae_XXX;Chrysophyceae_XXX_sp_;
Otu00196	0.0144279	26.4835	AY426842_1_1779_U	Eukaryota;Opisthokonta;Choanoflagellida;Choanoflagellatea;Craspedida;Monosigidae_Group_B;Monosigidae_Group_B_X;Monosigidae_Group_B_X_sp_;
Otu00172	0.0189252	26.4395	KF130006_1_1740_U	Eukaryota;Stramenopiles;Sagenista;MAST-9;MAST-9A;MAST-9A_X;MAST-9A_XX;MAST-9A_XX_sp_;
Otu00297	0.0071683	26.2503	AF265339_1_1126_U	Eukaryota;Stramenopiles;Sagenista;Labyrinthulomycetes;Labyrinthulida;Labyrinthulaceae;Aplanochytrium;Aplanochytrium_minutum;
Otu00284	0.17713	26.1545	KF130231_1_1758_U	Eukaryota;Alveolata;Dinoflagellata;Dinophyceae;Dinophyceae_X;Dinophyceae_XX;Dinophyceae_XXX;Dinophyceae_XXX_sp_;
Otu00072	0.0364579	26.116	EU333070_1_800_U	Eukaryota;Stramenopiles;Ochrophyta;MOCH-2;MOCH-2_X;MOCH-2_XX;MOCH-2_XXX;MOCH-2_XXX_sp_;
Otu00387	0.00452014	26.1012	KJ760349_1_1798_U	Eukaryota;Alveolata;Dinoflagellata;Syndiniales;Dino-Group-II;Dino-Group-II-Clade-1;Dino-Group-II-Clade-1_X;Dino-Group-II-Clade-1_X_sp_;
Otu00405	0.016551	26.0714	AM491005_1_1723_U	Eukaryota;Hacrobia;Haptophyta;Prymnesiophyceae;Prymnesiales;Prymnesiaceae;Prymnesium;Prymnesium_faveolatum;
Otu00799	0.0309561	25.9686	MG972261_1_1718_U	Eukaryota;Stramenopiles;Ochrophyta;Bacillariophyta;Bacillariophyta_X;Polar-centric-Mediophyceae;Chaetoceros;Chaetoceros_diadema_2;
Otu00968	0.0154552	25.9192	KJ757849_1_1798_U	Eukaryota;Stramenopiles;Ochrophyta;Bolidophyceae;Parmales;Parmales_env_3;Parmales_env_3_X;Parmales_env_3_X_sp_;
Otu00347	0.125194	25.8821	JX188346_1_1760_U	Eukaryota;Alveolata;Dinoflagellata;Syndiniales;Dino-Group-II;Dino-Group-II-Clade-13;Dino-Group-II-Clade-13_X;Dino-Group-II-Clade-13_X_sp_;
Otu00148	0.00894897	25.8607	KJ763295_1_1800_U	Eukaryota;Alveolata;Dinoflagellata;Dinophyceae;Gonyaulacales;Ceratiaceae;Tripos;Tripos_fusus;
Otu00307	0.0336043	25.8541	AF363186_1_1797_U	Eukaryota;Stramenopiles;Pseudofungi;MAST-2;MAST-2B;MAST-2B_X;MAST-2B_XX;MAST-2B_XX_sp_;
Otu00452	0.00317323	25.7957	JQ222894_1_1622_U	Eukaryota;Archaeplastida;Prasinodermophyta;Prasinodermophyceae;Prasinodermales;Prasinodermaceae;Prasinoderma;Prasinoderma_sp_;
Otu00102	0.763995	25.5805	AY425318_1_1734_U	Eukaryota;Archaeplastida;Chlorophyta;Mamiellophyceae;Mamiellales;Mamiellaceae;Micromonas;Micromonas_clade_B4;
Otu00602	0.00942838	25.5534	KJ763175_1_1759_U	Eukaryota;Alveolata;Ciliophora;Spirotrichea;Choreotrichida;Strobilidiidae_I;Pelagostrobilidium;Pelagostrobilidium_sp_;
Otu00516	0.0269382	25.5009	EF219011_1_1691_U	Eukaryota;Alveolata;Dinoflagellata;Syndiniales;Dino-Group-I;Dino-Group-I-Clade-3;Dino-Group-I-Clade-3_X;Dino-Group-I-Clade-3_X_sp_;
Otu00232	0.0022829	25.2525	KC582944_1_1792_U	Eukaryota;Alveolata;Dinoflagellata;Syndiniales;Dino-Group-II;Dino-Group-II_X;Dino-Group-II_XX;Dino-Group-II_XX_sp_;
Otu00407	0.0390376	25.1657	KJ762603_1_1796_U	Eukaryota;Alveolata;Dinoflagellata;Syndiniales;Dino-Group-II;Dino-Group-II-Clade-3;Dino-Group-II-Clade-3_X;Dino-Group-II-Clade-3_X_sp_;
Otu00224	0.0461146	25.0506	AB275030_1_1682_U	Eukaryota;Alveolata;Ciliophora;Spirotrichea;Strombidiida;Strombidiida_X;Strombidiida_XX;Strombidiida_XX_sp_;
Otu00181	0.0103415	25.0346	KJ759496_1_1802_U	Eukaryota;Stramenopiles;Ochrophyta;Bolidophyceae;Parmales;Triparmaceae;Triparma;Triparma_mediterranea;
Otu00314	0.0126701	25.0162	JX188303_1_1756_U	Eukaryota;Alveolata;Dinoflagellata;Syndiniales;Dino-Group-II;Dino-Group-II-Clade-3;Dino-Group-II-Clade-3_X;Dino-Group-II-Clade-3_X_sp_;
Otu00027	0.614762	24.9291	AACY020216037_2_1466_U	Eukaryota;Alveolata;Dinoflagellata;Syndiniales;Dino-Group-II;Dino-Group-II-Clade-10-and-11;Dino-Group-II-Clade-10-and-11_X;Dino-Group-II-Clade-10-and-11_X_sp_;
Otu00199	0.00301343	24.8205	KC582954_1_1787_U	Eukaryota;Alveolata;Dinoflagellata;Syndiniales;Dino-Group-II;Dino-Group-II-Clade-39;Dino-Group-II-Clade-39_X;Dino-Group-II-Clade-39_X_sp_;
Otu00291	0.023491	24.8001	EU446389_1_1555_U	Eukaryota;Alveolata;Dinoflagellata;Syndiniales;Dino-Group-II;Dino-Group-II-Clade-4;Dino-Group-II-Clade-4_X;Dino-Group-II-Clade-4_X_sp_;
Otu00188	0.00552462	24.7314	FR874287_1_1790_U	Eukaryota;Alveolata;Dinoflagellata;Syndiniales;Dino-Group-I;Dino-Group-I-Clade-1;Dino-Group-I-Clade-1_X;Dino-Group-I-Clade-1_X_sp_;
Otu00149	0.0277829	24.7042	EU446389_1_1555_U	Eukaryota;Alveolata;Dinoflagellata;Syndiniales;Dino-Group-II;Dino-Group-II-Clade-4;Dino-Group-II-Clade-4_X;Dino-Group-II-Clade-4_X_sp_;
Otu00058	0.220711	24.6623	JX188350_1_1750_U	Eukaryota;Alveolata;Dinoflagellata;Syndiniales;Dino-Group-I;Dino-Group-I-Clade-5;Dino-Group-I-Clade-5_X;Dino-Group-I-Clade-5_X_sp_;
Otu00358	0.00410922	24.6575	KF129738_1_1746_U	Eukaryota;Stramenopiles;Opalozoa;MAST-3;MAST-3J;MAST-3J_X;MAST-3J_XX;MAST-3J_XX_sp_;
Otu00374	0.00303626	24.534	EU446389_1_1555_U	Eukaryota;Alveolata;Dinoflagellata;Syndiniales;Dino-Group-II;Dino-Group-II-Clade-4;Dino-Group-II-Clade-4_X;Dino-Group-II-Clade-4_X_sp_;
Otu00170	0.286572	24.5062	KJ758267_1_1770_U	Eukaryota;Alveolata;Ciliophora;Spirotrichea;Tintinnida;Tintinnidae;Tintinnidae_X;Tintinnidae_X_sp_;
Otu00435	0.00483975	24.4527	JF791074_1_1777_U	Eukaryota;Stramenopiles;Opalozoa;MAST-3;MAST-3E;MAST-3E_X;MAST-3E_XX;MAST-3E_XX_sp_;
Otu00011	0.328464	24.4215	KR362889_1_1795_U	Eukaryota;Alveolata;Dinoflagellata;Dinophyceae;Peridiniales;Amphidomataceae;Azadinium;Azadinium_dexteroporum;
Otu02442	0.00814995	24.4108	AB546639_1_1717_U	Eukaryota;Stramenopiles;Ochrophyta;Bolidophyceae;Parmales;Triparmaceae;Triparma;Triparma_laevis_f__inornata;
Otu00250	0.00584422	24.381	KJ761230_1_1793_U	Eukaryota;Alveolata;Dinoflagellata;Syndiniales;Dino-Group-II;Dino-Group-II-Clade-1;Dino-Group-II-Clade-1_X;Dino-Group-II-Clade-1_X_sp_;
Otu00495	0.0229431	24.3338	JF730859_1_1687_U	Eukaryota;Stramenopiles;Ochrophyta;Chrysophyceae;Chrysophyceae_X;Chrysophyceae_Clade-D;Chrysophyceae_Clade-D_X;Chrysophyceae_Clade-D_X_sp_;
Otu00344	0.0232171	24.2865	AY129047_1_1800_U	Eukaryota;Alveolata;Dinoflagellata;Syndiniales;Dino-Group-II;Dino-Group-II-Clade-10-and-11;Dino-Group-II-Clade-10-and-11_X;Dino-Group-II-Clade-10-and-11_X_sp_;
Otu00394	0.0515479	24.2712	FN690341_1_830_U	Eukaryota;Alveolata;Dinoflagellata;Syndiniales;Dino-Group-II;Dino-Group-II-Clade-28;Dino-Group-II-Clade-28_X;Dino-Group-II-Clade-28_X_sp_;
Otu00278	0.00226007	24.0811	KF129842_1_1759_U	Eukaryota;Alveolata;Dinoflagellata;Syndiniales;Dino-Group-II;Dino-Group-II-Clade-10-and-11;Dino-Group-II-Clade-10-and-11_X;Dino-Group-II-Clade-10-and-11_X_sp_;
Otu00383	0.00538764	23.8834	AB183602_1_1749_U	Eukaryota;Archaeplastida;Prasinodermophyta;Prasinodermophyceae;Prasinodermales;Prasinodermaceae;Prasinoderma;Prasinoderma_coloniale;
Otu00364	0.0222126	23.8561	GQ863817_1_1709_U	Eukaryota;Hacrobia;Haptophyta;Prymnesiophyceae;Phaeocystales;Phaeocystaceae;Phaeocystis;Phaeocystis_sp_;
Otu00120	0.366086	23.8513	KJ760385_1_1796_U	Eukaryota;Alveolata;Dinoflagellata;Syndiniales;Dino-Group-II;Dino-Group-II-Clade-3;Dino-Group-II-Clade-3_X;Dino-Group-II-Clade-3_X_sp_;
Otu00548	0.00890331	23.8327	AB330055_1_1510_U	Eukaryota;Alveolata;Ciliophora;Phyllopharyngea;Cyrtophoria_1;PHYLL_4;PHYLL_4_X;PHYLL_4_X_sp_;
Otu00998	0.00915443	23.8118	EU333099_1_800_U	Eukaryota;Alveolata;Dinoflagellata;Syndiniales;Dino-Group-II;Dino-Group-II-Clade-10-and-11;Dino-Group-II-Clade-10-and-11_X;Dino-Group-II-Clade-10-and-11_X_sp_;
Otu00066	1.37563	23.7809	KF129723_1_1735_U	Eukaryota;Alveolata;Ciliophora;Spirotrichea;Strombidiida_D;Strombidiida_D_X;Strombidiida_D_XX;Strombidiida_D_XX_sp_;
Otu00133	0.0168021	23.7461	AF521100_1_1753_U	Eukaryota;Alveolata;Dinoflagellata;Dinophyceae;Peridiniales;Podolampadaceae;Lessardia;Lessardia_elongata;
Otu00176	0.0219158	23.722	KJ759731_1_1795_U	Eukaryota;Alveolata;Dinoflagellata;Syndiniales;Dino-Group-II;Dino-Group-II-Clade-3;Dino-Group-II-Clade-3_X;Dino-Group-II-Clade-3_X_sp_;
Otu00433	0.0028308	23.6554	KC488433_1_1690_U	Eukaryota;Alveolata;Dinoflagellata;Dinophyceae;Dinophyceae_X;Dinophyceae_XX;Dinophyceae_XXX;Dinophyceae_XXX_sp_;
Otu00574	0.0381701	23.6353	AY789783_1_1210_U	Eukaryota;Stramenopiles;Pseudofungi;Oomycota;Oomycota_X;Olpidophydiales;Olpidophydiales_X;Olpidophydiales_X_sp_;
Otu00390	0.0867045	23.5136	AY665085_1_1731_U	Eukaryota;Alveolata;Ciliophora;Spirotrichea;Strombidiida;Strombidiidae_H;Strombidiidae_H_X;Strombidiidae_H_X_sp_;
Otu00400	0.0051137	23.4248	HQ394099_1_841_U	Eukaryota;Stramenopiles;Ochrophyta;Bacillariophyta;Bacillariophyta_X;Radial-centric-basal-Coscinodiscophyceae;Leptocylindrus;Leptocylindrus_sp_;
Otu00687	0.00862936	23.3776	HQ393981_1_807_U	Eukaryota;Stramenopiles;Sagenista;Labyrinthulomycetes;Thraustochytrida;Thraustochytriaceae;Thraustochytriaceae_LAB17;Thraustochytriaceae_LAB17_sp_;
Otu00668	0.00678021	23.3419	EF172967_1_1680_U	Eukaryota;Hacrobia;Haptophyta;Prymnesiophyceae;Prymnesiales;Chrysochromulinaceae;Chrysochromulina;Chrysochromulina_sp_;
Otu00650	0.0112319	23.3068	KJ762993_1_1797_U	Eukaryota;Alveolata;Dinoflagellata;Dinophyceae;Dinophyceae_X;Dinophyceae_XX;Dinophyceae_XXX;Dinophyceae_XXX_sp_;
Otu00256	0.00536481	23.2722	KF130061_1_1763_U	Eukaryota;Hacrobia;Centroheliozoa;Centroheliozoa_X;Pterocystida;Pterocystida_X;Pterocystida_XX;Pterocystida_XX_sp_;
Otu00082	0.218222	23.1991	KJ577871_1_1764_U	Eukaryota;Stramenopiles;Ochrophyta;Ochrophyta_X;Ochrophyta_XX;Ochrophyta_XXX;Pseudosolenia;Pseudosolenia_calcar-avis;
Otu00558	0.0197243	23.1357	MG972234_1_1704_U	Eukaryota;Stramenopiles;Ochrophyta;Bacillariophyta;Bacillariophyta_X;Polar-centric-Mediophyceae;Chaetoceros;Chaetoceros_curvisetus_2a;
Otu00225	0.0597663	23.071	GQ365796_1_1539_U	Eukaryota;Hacrobia;Telonemia;Telonemia_X;Telonemia_XX;Telonemia-Group-2;Telonemia-Group-2_X;Telonemia-Group-2_X_sp_;
Otu00543	0.00584422	22.979	FR874779_1_1717_U	Eukaryota;Alveolata;Dinoflagellata;Syndiniales;Dino-Group-II;Dino-Group-II-Clade-32;Dino-Group-II-Clade-32_X;Dino-Group-II-Clade-32_X_sp_;
Otu00241	0.00253402	22.9441	KF130519_1_1757_U	Eukaryota;Alveolata;Dinoflagellata;Syndiniales;Dino-Group-II;Dino-Group-II-Clade-10-and-11;Dino-Group-II-Clade-10-and-11_X;Dino-Group-II-Clade-10-and-11_X_sp_;
Otu00550	0.00111862	22.8667	JF791041_1_1777_U	Eukaryota;Hacrobia;Picozoa;Picozoa_X;Picozoa_XX;Picozoa_XXX;Picozoa_XXXX;Picozoa_XXXX_sp_;
Otu00413	0.0212081	22.6728	EU143978_1_800_U	Eukaryota;Archaeplastida;Chlorophyta;Chlorophyceae;Chlamydomonadales;Chlamydomonadales_X;Chlamydomonadales_XX;Chlamydomonadales_XX_sp_;
Otu00352	0.00308191	22.6398	KF130061_1_1763_U	Eukaryota;Hacrobia;Centroheliozoa;Centroheliozoa_X;Pterocystida;Pterocystida_X;Pterocystida_XX;Pterocystida_XX_sp_;
Otu00470	0.0167793	22.5554	KF130593_1_1763_U	Eukaryota;Alveolata;Dinoflagellata;Syndiniales;Dino-Group-II;Dino-Group-II-Clade-10-and-11;Dino-Group-II-Clade-10-and-11_X;Dino-Group-II-Clade-10-and-11_X_sp_;
Otu01322	0.0116656	22.4852	HM581749_1_1797_U	Eukaryota;Alveolata;Dinoflagellata;Syndiniales;Dino-Group-II;Dino-Group-II-Clade-25;Dino-Group-II-Clade-25_X;Dino-Group-II-Clade-25_X_sp_;
Otu00506	0.00433751	22.4782	EU143481_1_898_U	Eukaryota;Archaeplastida;Prasinodermophyta;Prasinodermophyceae;Prasinodermales;Prasinodermaceae;Prasinodermaceae_X;Prasinodermaceae_X_sp_;
Otu00025	0.735185	22.4502	AY866417_1_1775_U	Eukaryota;Stramenopiles;Ochrophyta;Bacillariophyta;Bacillariophyta_X;Raphid-pennate;Cylindrotheca;Cylindrotheca_closterium;
Otu00062	0.386244	22.3269	KJ759570_1_1784_U	Eukaryota;Alveolata;Dinoflagellata;Syndiniales;Dino-Group-I;Dino-Group-I-Clade-5;Dino-Group-I-Clade-5_X;Dino-Group-I-Clade-5_X_sp_;
Otu00773	0.0022829	22.3214	EU143425_1_890_U	Eukaryota;Archaeplastida;Chlorophyta;Mamiellophyceae;Mamiellales;Mamiellaceae;Mamiella;Mamiella_gilva;
Otu00416	0.00452014	22.2245	AB505549_1_1675_U	Eukaryota;Apusozoa;Apusomonadidae;Apusomonadidae_Group-1;Apusomonadidae_Group-1_X;Apusomonadidae_Group-1_XX;Apusomonadidae_Group-1_XXX;Apusomonadidae_Group-1_XXX_sp_;
Otu00119	0.671195	22.2074	JX413558_1_1637_U	Eukaryota;Stramenopiles;Ochrophyta;Bacillariophyta;Bacillariophyta_X;Radial-centric-basal-Coscinodiscophyceae;Leptocylindrus;
Otu00316	0.0244499	22.1766	KJ762885_1_1759_U	Eukaryota;Alveolata;Ciliophora;Spirotrichea;Strombidiida;Strombidiidae_J;Strombidiidae_J_X;Strombidiidae_J_X_sp_;
Otu00629	0.0181491	22.1693	KF129925_1_1760_U	Eukaryota;Alveolata;Dinoflagellata;Syndiniales;Dino-Group-I;Dino-Group-I-Clade-1;Dino-Group-I-Clade-1_X;Dino-Group-I-Clade-1_X_sp_;
Otu00683	0.00335586	22.0725	AB430602_1_1781_U	Eukaryota;Stramenopiles;Ochrophyta;Bacillariophyta;Bacillariophyta_X;Araphid-pennate;Rhaphoneis;Rhaphoneis_sp_;
Otu00976	0.00856087	22.0036	KF130206_1_1737_U	Eukaryota;Stramenopiles;Opalozoa;MAST-3;MAST-3I;MAST-3I_X;MAST-3I_XX;MAST-3I_XX_sp_;
Otu00705	0.148548	21.9949	KC488483_1_1710_U	Eukaryota;Alveolata;Dinoflagellata;Syndiniales;Dino-Group-II;Dino-Group-II-Clade-6;Dino-Group-II-Clade-6_X;Dino-Group-II-Clade-6_X_sp_;
Otu00305	0.0092914	21.9665	AM408889_1_1796_U	Eukaryota;Alveolata;Dinoflagellata;Dinophyceae;Gymnodiniales;Gymnodiniaceae;Paragymnodinium;Paragymnodinium_shiwhaense;
Otu00618	0.0150443	21.9212	EU143482_1_893_U	Eukaryota;Archaeplastida;Prasinodermophyta;Prasinodermophyceae;Prasinodermales;Prasinodermaceae;Prasinoderma;Prasinoderma_singularis;
Otu00205	0.0688751	21.8083	KJ759290_1_1793_U	Eukaryota;Opisthokonta;Metazoa;Arthropoda;Crustacea;Maxillopoda;Maxillopoda_X;Maxillopoda_X_sp_;
Otu00287	0.125171	21.7698	EF527109_1_1755_U	Eukaryota;Alveolata;Dinoflagellata;Dinophyceae;Gonyaulacales;Ceratiaceae;Ceratium;Ceratium_sp_;
Otu00414	0.0055931	21.7561	KC814811_1_1731_U	Eukaryota;Stramenopiles;Ochrophyta;Bacillariophyta;Bacillariophyta_X;Radial-centric-basal-Coscinodiscophyceae;Leptocylindrus;Leptocylindrus_convexus;
Otu00049	0.5815	21.7177	KP790150_1_1330_U	Eukaryota;Alveolata;Dinoflagellata;Dinophyceae;Gymnodiniales;Ceratoperidiniaceae;Ceratoperidinium;Ceratoperidinium_falcatum;
Otu00469	0.0267328	21.6417	KF130299_1_1759_U	Eukaryota;Alveolata;Dinoflagellata;Syndiniales;Dino-Group-II;Dino-Group-II-Clade-8;Dino-Group-II-Clade-8_X;Dino-Group-II-Clade-8_X_sp_;
Otu00360	0.00541047	21.6118	JX188346_1_1760_U	Eukaryota;Alveolata;Dinoflagellata;Syndiniales;Dino-Group-II;Dino-Group-II-Clade-13;Dino-Group-II-Clade-13_X;Dino-Group-II-Clade-13_X_sp_;
Otu00609	0.00899462	21.5905	JQ956275_1_1697_U	Eukaryota;Alveolata;Dinoflagellata;Syndiniales;Dino-Group-II;Dino-Group-II-Clade-1;Dino-Group-II-Clade-1_X;Dino-Group-II-Clade-1_X_sp_;
Otu00479	0.00458863	21.5472	HQ394144_1_825_U	Eukaryota;Hacrobia;Haptophyta;Prymnesiophyceae;Prymnesiales;Prymnesiaceae;Prymnesiaceae_X;Prymnesiaceae_X_sp_;
Otu00943	0.0544015	21.5241	EU793772_1_1655_U	Eukaryota;Alveolata;Dinoflagellata;Syndiniales;Dino-Group-II;Dino-Group-II-Clade-5;Dino-Group-II-Clade-5_X;Dino-Group-II-Clade-5_X_sp_;
Otu00299	0.00351567	21.5209	MG972330_1_911_U	Eukaryota;Stramenopiles;Ochrophyta;Bacillariophyta;Bacillariophyta_X;Polar-centric-Mediophyceae;Chaetoceros;Chaetoceros_affinis;
Otu00409	0.111542	21.3631	AF372790_1_1545_U	Eukaryota;Alveolata;Ciliophora;Spirotrichea;Strombidiida;Strombidiidae_K;Strombidiidae_K_X;Strombidiidae_K_X_sp_;
Otu00564	0.0142681	21.2863	KF129807_1_1750_U	Eukaryota;Opisthokonta;Fungi;Chytridiomycota;Chytridiomycotina;Chytridiomycetes;Spizellomycetales-and-Rhizophlyctidales;Spizellomycetales-and-Rhizophlyctidales_sp_;
Otu00699	0.00933706	21.2744	AY129049_1_1796_U	Eukaryota;Alveolata;Dinoflagellata;Syndiniales;Dino-Group-II;Dino-Group-II-Clade-16;Dino-Group-II-Clade-16_X;Dino-Group-II-Clade-16_X_sp_;
Otu00764	0.00276231	21.1881	KC488505_1_1701_U	Eukaryota;Alveolata;Dinoflagellata;Syndiniales;Dino-Group-II;Dino-Group-II-Clade-1;Dino-Group-II-Clade-1_X;Dino-Group-II-Clade-1_X_sp_;
Otu00211	0.0861795	21.1748	EU333101_1_800_U	Eukaryota;Alveolata;Ciliophora;Spirotrichea;Tintinnida;Eutintinnidae;Eutintinnidae_X;Eutintinnidae_X_sp_;
Otu00150	0.133435	21.1091	KF130056_1_1743_U	Eukaryota;Stramenopiles;Ochrophyta;Chrysophyceae;Chrysophyceae_X;Chrysophyceae_Clade-H;Chrysophyceae_Clade-H_X;Chrysophyceae_Clade-H_X_sp_;
Otu00756	0.0134691	21.0256	KJ760053_1_1794_U	Eukaryota;Alveolata;Dinoflagellata;Dinophyceae;Dinophyceae_X;Dinophyceae_XX;Dinophyceae_XXX;Dinophyceae_XXX_sp_;
Otu00412	0.0102046	20.9773	KJ759041_1_1796_U	Eukaryota;Alveolata;Dinoflagellata;Syndiniales;Dino-Group-II;Dino-Group-II-Clade-1;Dino-Group-II-Clade-1_X;Dino-Group-II-Clade-1_X_sp_;
Otu01246	0.00232856	20.8916	JQ782000_1_1797_U	Eukaryota;Stramenopiles;Opalozoa;MAST-3;MAST-3K;MAST-3K_X;MAST-3K_XX;MAST-3K_XX_sp_;
Otu00097	0.0155694	20.8445	KJ760385_1_1796_U	Eukaryota;Alveolata;Dinoflagellata;Syndiniales;Dino-Group-II;Dino-Group-II-Clade-3;Dino-Group-II-Clade-3_X;Dino-Group-II-Clade-3_X_sp_;
Otu00444	0.0417086	20.8356	KJ925383_1_1505_U	Eukaryota;Alveolata;Dinoflagellata;Dinophyceae;Peridiniales;Thoracosphaeraceae;Thoracosphaeraceae_X;Thoracosphaeraceae_X_sp_;
Otu00489	0.0152954	20.8171	KJ763630_1_1795_U	Eukaryota;Alveolata;Dinoflagellata;Syndiniales;Dino-Group-II;Dino-Group-II-Clade-17;Dino-Group-II-Clade-17_X;Dino-Group-II-Clade-17_X_sp_;
Otu00294	0.00216875	20.7471	AY885029_1_1278_U	Eukaryota;Alveolata;Dinoflagellata;Syndiniales;Dino-Group-II;Dino-Group-II-Clade-39;Dino-Group-II-Clade-39_X;Dino-Group-II-Clade-39_X_sp_;
Otu00507	0.00449731	20.7202	AB246746_1_1727_U	Eukaryota;Stramenopiles;Ochrophyta;Bacillariophyta;Bacillariophyta_X;Polar-centric-Mediophyceae;Chaetoceros;Chaetoceros_sp_P__quinquecorne_endosymbiont;
Otu00377	0.00602686	20.4868	KF130184_1_1758_U	Eukaryota;Alveolata;Dinoflagellata;Syndiniales;Dino-Group-II;Dino-Group-II_X;Dino-Group-II_XX;Dino-Group-II_XX_sp_;
Otu00776	0.00723679	20.4537	AB183670_1_1754_U	Eukaryota;Alveolata;Dinoflagellata;Dinophyceae;Peridiniales;Heterocapsaceae;Heterocapsa;Heterocapsa_triquetra;
Otu00318	0.0137431	20.4355	AJ629844_1_1739_U	Eukaryota;Archaeplastida;Chlorophyta;Mamiellophyceae;Dolichomastigales;Crustomastigaceae;Crustomastix;Crustomastix_stigmata;
Otu01015	0.0120994	20.2904	AF231803_1_1797_U	Eukaryota;Alveolata;Dinoflagellata;Dinophyceae;Peridiniales;Kryptoperidiniaceae;Durinskia;Durinskia_dybowskii;
Otu00300	0.00376678	20.2416	KF129814_1_1748_U	Eukaryota;Alveolata;Dinoflagellata;Syndiniales;Dino-Group-II;Dino-Group-II_X;Dino-Group-II_XX;Dino-Group-II_XX_sp_;
Otu00714	0.00378961	20.2023	EF526860_1_1554_U	Eukaryota;Hacrobia;Telonemia;Telonemia_X;Telonemia_XX;Telonemia-Group-2;Telonemia-Group-2_X;Telonemia-Group-2_X_sp_;
Otu00222	0.00333303	20.1856	KJ762603_1_1796_U	Eukaryota;Alveolata;Dinoflagellata;Syndiniales;Dino-Group-II;Dino-Group-II-Clade-3;Dino-Group-II-Clade-3_X;Dino-Group-II-Clade-3_X_sp_;
Otu00240	0.0224181	20.0876	KJ759426_1_1797_U	Eukaryota;Alveolata;Dinoflagellata;Dinophyceae;Gymnodiniales;Gymnodiniaceae;Gymnodinium;Gymnodinium_sp_;
Otu00331	0.0128756	20.0869	EF173016_1_1674_U	Eukaryota;Alveolata;Dinoflagellata;Syndiniales;Dino-Group-II;Dino-Group-II-Clade-1;Dino-Group-II-Clade-1_X;Dino-Group-II-Clade-1_X_sp_;
Otu00501	0.00488541	20.0684	KF129788_1_1760_U	Eukaryota;Alveolata;Dinoflagellata;Syndiniales;Dino-Group-II;Dino-Group-II-Clade-12;Dino-Group-II-Clade-12_X;Dino-Group-II-Clade-12_X_sp_;
Otu00631	0.00328738	20.0542	HQ658161_1_1742_U	Eukaryota;Alveolata;Dinoflagellata;Syndiniales;Dino-Group-II;Dino-Group-II-Clade-2;Dino-Group-II-Clade-2_X;Dino-Group-II-Clade-2_X_sp_;
Otu00357	0.00246553	20.0412	KJ762754_1_1800_U	Eukaryota;Alveolata;Dinoflagellata;Dinophyceae;Dinophyceae_X;Dinophyceae_XX;Dinophyceae_XXX;Dinophyceae_XXX_sp_;
Otu00770	0.00458863	19.9906	FJ827634_1_1057_U	Eukaryota;Opisthokonta;Fungi;Chytridiomycota;Chytridiomycotina;Chytridiomycetes;Powellomyces;Powellomyces_sp_;
Otu00107	0.0502695	19.9883	EU371387_1_1782_U	Eukaryota;Alveolata;Ciliophora;Spirotrichea;Strombidiida;Strombidiidae;Strombidiidae_X;Strombidiidae_X_sp_;
Otu00182	0.0059812	19.9663	AF509625_1_1681_U	Eukaryota;Archaeplastida;Chlorophyta;Mamiellophyceae;Dolichomastigales;Dolichomastigaceae;Dolichomastix;Dolichomastix_tenuilepis;
Otu00146	0.0680532	19.9593	DQ317536_1_1799_U	Eukaryota;Alveolata;Dinoflagellata;Dinophyceae;Peridiniales;Blastodiniaceae;Blastodinium;Blastodinium_contortum;
Otu00254	0.0268697	19.9532	AY520445_1_1790_U	Eukaryota;Stramenopiles;Opalozoa;Bicoecea;Bicoecales;Bicoecaceae;Bicosoeca;Bicosoeca_vacillans;
Otu00432	0.00269382	19.9484	AB695501_1_1724_U	Eukaryota;Alveolata;Ciliophora;CONThreeP;CONThreeP_X;Urotrichidae;Urotricha;Urotricha_sp_;
Otu00068	0.298033	19.9191	GQ483674_1_817_U	Eukaryota;Alveolata;Dinoflagellata;Dinophyceae;Suessiales;Suessiaceae;Suessiaceae_X;Suessiaceae_X_sp_;
Otu01043	0.0121679	19.8013	KF129839_1_1764_U	Eukaryota;Stramenopiles;Opalozoa;MAST-12;MAST-12D;MAST-12D_X;MAST-12D_XX;MAST-12D_XX_sp_;
Otu00792	0.00219158	19.7768	EF173016_1_1674_U	Eukaryota;Alveolata;Dinoflagellata;Syndiniales;Dino-Group-II;Dino-Group-II-Clade-1;Dino-Group-II-Clade-1_X;Dino-Group-II-Clade-1_X_sp_;
Otu00332	0.0040179	19.6798	AB363063_1_1731_U	Eukaryota;Stramenopiles;Pseudofungi;Oomycota;Oomycota_X;Olpidophydiales;Olpidiopsis;Olpidiopsis_sp_;
Otu00127	0.0864991	19.619	AY268039_1_1732_U	Eukaryota;Apusozoa;Apusomonadidae;Apusomonadidae_Group-1;Apusomonadidae_Group-1_X;Apusomonadidae_Group-1_XX;Amastigomonas;Amastigomonas_sp_;
Otu00057	0.303626	19.5921	JX188283_1_1756_U	Eukaryota;Alveolata;Dinoflagellata;Syndiniales;Dino-Group-II;Dino-Group-II-Clade-16;Dino-Group-II-Clade-16_X;Dino-Group-II-Clade-16_X_sp_;
Otu00738	0.00335586	19.5557	HQ394099_1_841_U	Eukaryota;Stramenopiles;Ochrophyta;Bacillariophyta;Bacillariophyta_X;Radial-centric-basal-Coscinodiscophyceae;Leptocylindrus;Leptocylindrus_sp_;
Otu00185	0.00397225	19.5329	GQ365796_1_1539_U	Eukaryota;Hacrobia;Telonemia;Telonemia_X;Telonemia_XX;Telonemia-Group-2;Telonemia-Group-2_X;Telonemia-Group-2_X_sp_;
Otu00351	0.01041	19.5282	AB847416_1_1747_U	Eukaryota;Stramenopiles;Ochrophyta;Bacillariophyta;Bacillariophyta_X;Polar-centric-Mediophyceae;Chaetoceros;Chaetoceros_sp_;
Otu00168	0.0322345	19.5182	KJ762559_1_1779_U	Eukaryota;Stramenopiles;Opalozoa;MAST-3;MAST-3I;MAST-3I_X;MAST-3I_XX;MAST-3I_XX_sp_;
Otu00621	0.00778469	19.4808	KJ759448_1_1794_U	Eukaryota;Alveolata;Dinoflagellata;Syndiniales;Dino-Group-II;Dino-Group-II-Clade-1;Dino-Group-II-Clade-1_X;Dino-Group-II-Clade-1_X_sp_;
Otu00290	0.01388	19.4621	KF130586_1_1759_U	Eukaryota;Alveolata;Dinoflagellata;Syndiniales;Dino-Group-II;Dino-Group-II-Clade-3;Dino-Group-II-Clade-3_X;Dino-Group-II-Clade-3_X_sp_;
Otu00137	0.00340152	19.3895	FN690660_1_1692_U	Eukaryota;Stramenopiles;Ochrophyta;Chrysophyceae;Chrysophyceae_X;Chrysophyceae_Clade-F;Chrysophyceae_Clade-F_X;Chrysophyceae_Clade-F_X_sp_;
Otu00180	0.0045658	19.3424	AY129040_1_1796_U	Eukaryota;Alveolata;Dinoflagellata;Syndiniales;Dino-Group-II;Dino-Group-II-Clade-2;Dino-Group-II-Clade-2_X;Dino-Group-II-Clade-2_X_sp_;
Otu00282	0.0250662	19.3224	KJ763295_1_1800_U	Eukaryota;Alveolata;Dinoflagellata;Dinophyceae;Gonyaulacales;Ceratiaceae;Tripos;Tripos_fusus;
Otu00195	0.00757923	19.2969	KJ763671_1_1796_U	Eukaryota;Alveolata;Dinoflagellata;Syndiniales;Dino-Group-II;Dino-Group-II-Clade-1;Dino-Group-II-Clade-1_X;Dino-Group-II-Clade-1_X_sp_;
Otu00155	0.00575291	19.2203	AF525879_1_1775_U	Eukaryota;Archaeplastida;Chlorophyta;Mamiellophyceae;Mamiellales;Bathycoccaceae;Bathycoccus;Bathycoccus_prasinos;
Otu00684	0.00611817	19.1838	EF526909_1_1344_U	Eukaryota;Stramenopiles;Opalozoa;MAST-12;MAST-12A;MAST-12A_X;MAST-12A_XX;MAST-12A_XX_sp_;
Otu00694	0.00365264	19.133	EU143397_1_902_U	Eukaryota;Archaeplastida;Chlorophyta;Mamiellophyceae;Dolichomastigales;Crustomastigaceae;Crustomastigaceae-AB;Crustomastigaceae-AB_sp_;
Otu00108	1.01498	19.0519	JF790988_1_1777_U	Eukaryota;Alveolata;Dinoflagellata;Syndiniales;Dino-Group-I;Dino-Group-I-Clade-1;Dino-Group-I-Clade-1_X;Dino-Group-I-Clade-1_X_sp_;
Otu00126	0.00659758	19.0123	HQ026766_1_1127_U	Eukaryota;Opisthokonta;Choanoflagellida;Choanoflagellatea;Acanthoecida;Stephanoecidae_Group_H;Stephanoeca_Group_H;Stephanoeca_cauliculata;
Otu00329	0.00116428	18.9854	HQ394099_1_841_U	Eukaryota;Stramenopiles;Ochrophyta;Bacillariophyta;Bacillariophyta_X;Radial-centric-basal-Coscinodiscophyceae;Leptocylindrus;Leptocylindrus_sp_;
Otu00267	0.00257968	18.9733	AB008406_1_1733_U	Eukaryota;Opisthokonta;Fungi;Ascomycota;Pezizomycotina;Eurotiomycetes;Hemicarpenteles;Hemicarpenteles_ornatus;
Otu00238	0.00413205	18.9699	JQ223050_1_1626_U	Eukaryota;Opisthokonta;Fungi;Chytridiomycota;Chytridiomycotina;Chytridiomycetes;Chytridiomycetes_X;Chytridiomycetes_X_sp_;
Otu00909	0.0047256	18.9346	GQ365767_1_1536_U	Eukaryota;Hacrobia;Telonemia;Telonemia_X;Telonemia_XX;Telonemia-Group-2;Telonemia-Group-2_X;Telonemia-Group-2_X_sp_;
Otu00210	0.195599	18.932	AF363186_1_1797_U	Eukaryota;Stramenopiles;Pseudofungi;MAST-2;MAST-2B;MAST-2B_X;MAST-2B_XX;MAST-2B_XX_sp_;
Otu00397	0.00424619	18.9256	FJ153754_1_1787_U	Eukaryota;Stramenopiles;Sagenista;Labyrinthulomycetes;Labyrinthulida;Labyrinthulaceae;Labyrinthulaceae_ANT10_3;Labyrinthulaceae_ANT10_3_sp_;
Otu00153	0.466488	18.8502	KJ762507_1_1793_U	Eukaryota;Alveolata;Dinoflagellata;Syndiniales;Dino-Group-I;Dino-Group-I-Clade-5;Dino-Group-I-Clade-5_X;Dino-Group-I-Clade-5_X_sp_;
Otu00957	0.00465712	18.8137	KC582886_1_1799_U	Eukaryota;Alveolata;Dinoflagellata;Syndiniales;Dino-Group-II;Dino-Group-II-Clade-10-and-11;Dino-Group-II-Clade-10-and-11_X;Dino-Group-II-Clade-10-and-11_X_sp_;
Otu00111	0.0219843	18.7472	AF363186_1_1797_U	Eukaryota;Stramenopiles;Pseudofungi;MAST-2;MAST-2B;MAST-2B_X;MAST-2B_XX;MAST-2B_XX_sp_;
Otu00966	0.0152269	18.7345	KC488363_1_1629_U	Eukaryota;Alveolata;Ciliophora;Nassophorea;Nassophorea_X;Discotrichidae;NASSO_1;NASSO_1_sp_;
Otu00156	0.138001	18.7296	KJ763302_1_1799_U	Eukaryota;Alveolata;Dinoflagellata;Syndiniales;Dino-Group-II;Dino-Group-II-Clade-12;Dino-Group-II-Clade-12_X;Dino-Group-II-Clade-12_X_sp_;
Otu00330	0.00267099	18.7264	AF509625_1_1681_U	Eukaryota;Archaeplastida;Chlorophyta;Mamiellophyceae;Dolichomastigales;Dolichomastigaceae;Dolichomastix;Dolichomastix_tenuilepis;
Otu00071	0.126769	18.7148	AY789788_1_1185_U	Eukaryota;Opisthokonta;Choanoflagellida;Choanoflagellatea;Acanthoecida;Stephanoecidae_Group_H;Stephanoecidae_Group_H_X;Stephanoecidae_Group_H_X_sp_;
Otu00246	0.0114602	18.703	AB183628_1_1747_U	Eukaryota;Archaeplastida;Chlorophyta;Mamiellophyceae;Dolichomastigales;Crustomastigaceae;Crustomastix;Crustomastix_didyma;
Otu00206	0.00216875	18.6853	KF130586_1_1759_U	Eukaryota;Alveolata;Dinoflagellata;Syndiniales;Dino-Group-II;Dino-Group-II-Clade-3;Dino-Group-II-Clade-3_X;Dino-Group-II-Clade-3_X_sp_;
Otu00551	0.0340837	18.6745	AY919747_1_1717_U	Eukaryota;Stramenopiles;Ochrophyta;Chrysophyceae;Chrysophyceae_X;Chrysophyceae_Clade-H;Chrysophyceae_Clade-H_X;Chrysophyceae_Clade-H_X_sp_;
Otu00486	0.0262533	18.6467	KF129723_1_1735_U	Eukaryota;Alveolata;Ciliophora;Spirotrichea;Strombidiida_D;Strombidiida_D_X;Strombidiida_D_XX;Strombidiida_D_XX_sp_;
Otu00887	0.022692	18.619	KJ763489_1_1801_U	Eukaryota;Alveolata;Dinoflagellata;Syndiniales;Dino-Group-II;Dino-Group-II-Clade-1;Dino-Group-II-Clade-1_X;Dino-Group-II-Clade-1_X_sp_;
Otu00262	0.00207744	18.609	AY426868_1_1778_U	Eukaryota;Opisthokonta;Choanoflagellida;Choanoflagellatea;Acanthoecida;Stephanoecidae_Group_E;Stephanoecidae_Group_E_X;Stephanoecidae_Group_E_X_sp_;
Otu00253	0.0149073	18.5904	KJ763588_1_1798_U	Eukaryota;Alveolata;Dinoflagellata;Dinophyceae;Dinophyceae_X;Dinophyceae_XX;Dinophyceae_XXX;Dinophyceae_XXX_sp_;
Otu00670	0.00214593	18.4854	HM581767_1_1779_U	Eukaryota;Alveolata;Dinoflagellata;Dinophyceae;Gymnodiniales;Gymnodiniaceae;Gyrodinium;Gyrodinium_spirale;
Otu00640	0.00504521	18.4375	KJ763101_1_1798_U	Eukaryota;Alveolata;Dinoflagellata;Syndiniales;Dino-Group-II;Dino-Group-II-Clade-12;Dino-Group-II-Clade-12_X;Dino-Group-II-Clade-12_X_sp_;
Otu00520	0.0031504	18.4178	KF129837_1_1746_U	Eukaryota;Alveolata;Dinoflagellata;Syndiniales;Dino-Group-I;Dino-Group-I-Clade-4;Dino-Group-I-Clade-4_X;Dino-Group-I-Clade-4_X_sp_;
Otu00190	0.00267099	18.3745	KC488357_1_1681_U	Eukaryota;Opisthokonta;Choanoflagellida;Choanoflagellatea;Acanthoecida;Stephanoecidae_Group_D;Stephanoecidae_Group_D_X;Stephanoecidae_Group_D_X_sp_;
Otu00191	0.00198612	18.3269	KJ763323_1_1799_U	Eukaryota;Alveolata;Dinoflagellata;Dinophyceae;Gonyaulacales;Ceratiaceae;Tripos;Tripos_furca;
Otu00218	0.00643778	18.3151	KJ759570_1_1784_U	Eukaryota;Alveolata;Dinoflagellata;Syndiniales;Dino-Group-I;Dino-Group-I-Clade-5;Dino-Group-I-Clade-5_X;Dino-Group-I-Clade-5_X_sp_;
Otu00830	0.00349284	18.3026	AF107087_1_1795_U	Eukaryota;Hacrobia;Haptophyta;Prymnesiophyceae;Prymnesiales;Prymnesiophyceae_Clade_B5;Prymnesiophyceae_Clade_B5_X;Prymnesiophyceae_Clade_B5_X_sp_;
Otu00380	0.00168935	18.2533	AY129064_1_1799_U	Eukaryota;Stramenopiles;Sagenista;MAST-7;MAST-7B;MAST-7B_X;MAST-7B_XX;MAST-7B_XX_sp_;
Otu00104	0.437609	18.2471	EU793933_1_1559_U	Eukaryota;Alveolata;Dinoflagellata;Syndiniales;Dino-Group-II;Dino-Group-II-Clade-44;Dino-Group-II-Clade-44_X;Dino-Group-II-Clade-44_X_sp_;
Otu00992	0.00105013	18.2414	AF525879_1_1775_U	Eukaryota;Archaeplastida;Chlorophyta;Mamiellophyceae;Mamiellales;Bathycoccaceae;Bathycoccus;Bathycoccus_prasinos;
Otu00553	0.0283764	18.1726	KF129967_1_1739_U	Eukaryota;Stramenopiles;Sagenista;MAST-9;MAST-9A;MAST-9A_X;MAST-9A_XX;MAST-9A_XX_sp_;
Otu00361	0.00732811	18.1251	KJ761166_1_1794_U	Eukaryota;Alveolata;Dinoflagellata;Syndiniales;Dino-Group-II;Dino-Group-II-Clade-1;Dino-Group-II-Clade-1_X;Dino-Group-II-Clade-1_X_sp_;
Otu00955	0.0266414	18.0859	KC582886_1_1799_U	Eukaryota;Alveolata;Dinoflagellata;Syndiniales;Dino-Group-II;Dino-Group-II-Clade-10-and-11;Dino-Group-II-Clade-10-and-11_X;Dino-Group-II-Clade-10-and-11_X_sp_;
Otu00202	0.0104785	18.0827	HM749944_1_1542_U	Eukaryota;Stramenopiles;Ochrophyta;Chrysophyceae;Chrysophyceae_X;Chrysophyceae_Clade-C;Chrysophyceae_Clade-C_X;Chrysophyceae_Clade-C_X_sp_;
Otu00247	0.00378961	18.0577	KJ763489_1_1801_U	Eukaryota;Alveolata;Dinoflagellata;Syndiniales;Dino-Group-II;Dino-Group-II-Clade-1;Dino-Group-II-Clade-1_X;Dino-Group-II-Clade-1_X_sp_;
Otu00923	0.00226007	18.0497	AB636316_1_1726_U	Eukaryota;Hacrobia;Haptophyta;Prymnesiophyceae;Calcihaptophycidae;Watznaueriaceae;Tergestiella;Tergestiellaadriatica;
Otu00033	2.52212	18.0447	FJ549370_1_1796_U	Eukaryota;Alveolata;Dinoflagellata;Dinophyceae;Peridiniales;Heterocapsaceae;Heterocapsa;Heterocapsa_sp_;
Otu00239	0.00255685	18.023	KJ757712_1_1793_U	Eukaryota;Opisthokonta;Metazoa;Cnidaria;Cnidaria_X;Hydrozoa;Hydrozoa_X;Hydrozoa_X_sp_;
Otu00798	0.0307735	17.9815	AB293551_1_1721_U	Eukaryota;Hacrobia;Haptophyta;Pavlovophyceae;Pavlovales;Pavlovaceae;Pavlova;Pavlova_pinguis;
Otu00535	0.0481464	17.9639	AJ402350_1_1758_U	Eukaryota;Stramenopiles;Pseudofungi;MAST-1;MAST-1D;MAST-1D_X;MAST-1D_XX;MAST-1D_XX_sp_;
Otu00415	0.00340152	17.9475	EU793087_1_924_U	Eukaryota;Alveolata;Dinoflagellata;Dinophyceae;Dinophyceae_X;Dinophyceae_XX;Dinophyceae_XXX;Dinophyceae_XXX_sp_;
Otu00488	0.00105013	17.9322	AF167153_1_1799_U	Eukaryota;Stramenopiles;Ochrophyta;Bolidophyceae;Parmales;Triparmaceae;Triparma;Triparma_eleuthera;
Otu00213	0.00997627	17.9162	EU446389_1_1555_U	Eukaryota;Alveolata;Dinoflagellata;Syndiniales;Dino-Group-II;Dino-Group-II-Clade-4;Dino-Group-II-Clade-4_X;Dino-Group-II-Clade-4_X_sp_;
Otu00173	0.0234682	17.9037	EU333093_1_800_U	Eukaryota;Alveolata;Dinoflagellata;Dinophyceae;Dinophyceae_X;Dinophyceae_XX;Dinophyceae_XXX;Dinophyceae_XXX_sp_;
Otu00546	0.0055931	17.8274	KF129714_1_1748_U	Eukaryota;Hacrobia;Telonemia;Telonemia_X;Telonemia_XX;Telonemia-Group-2;Telonemia-Group-2_X;Telonemia-Group-2_X_sp_;
Otu00728	0.00148388	17.827	AY381200_1_1796_U	Eukaryota;Stramenopiles;Opalozoa;MAST-3;MAST-3K;MAST-3K_X;MAST-3K_XX;MAST-3K_XX_sp_;
Otu00295	0.00308191	17.7459	HQ026766_1_1127_U	Eukaryota;Opisthokonta;Choanoflagellida;Choanoflagellatea;Acanthoecida;Stephanoecidae_Group_H;Stephanoeca_Group_H;Stephanoeca_cauliculata;
Otu00680	0.00531916	17.701	KC488466_1_1698_U	Eukaryota;Alveolata;Dinoflagellata;Syndiniales;Dino-Group-II;Dino-Group-II-Clade-13;Dino-Group-II-Clade-13_X;Dino-Group-II-Clade-13_X_sp_;
Otu00422	0.00125559	17.6901	AF472555_1_1812_U	Eukaryota;Alveolata;Dinoflagellata;Syndiniales;Dino-Group-II;Dino-Group-II-Clade-2;Dino-Group-II-Clade-2_X;Dino-Group-II-Clade-2_X_sp_;
Otu00587	0.00251119	17.6901	AF525871_1_1775_U	Eukaryota;Archaeplastida;Chlorophyta;Mamiellophyceae;Mamiellales;Mamiellaceae;Micromonas;Micromonas_bravo_B1;
Otu00271	0.00431468	17.6574	EU793933_1_1559_U	Eukaryota;Alveolata;Dinoflagellata;Syndiniales;Dino-Group-II;Dino-Group-II-Clade-44;Dino-Group-II-Clade-44_X;Dino-Group-II-Clade-44_X_sp_;
Otu01315	0.0115515	17.6552	KJ758732_1_1796_U	Eukaryota;Alveolata;Dinoflagellata;Syndiniales;Dino-Group-II;Dino-Group-II-Clade-3;Dino-Group-II-Clade-3_X;Dino-Group-II-Clade-3_X_sp_;
Otu00023	1.23557	17.6251	KJ763017_1_1795_U	Eukaryota;Alveolata;Dinoflagellata;Dinophyceae;Dinophyceae_X;Dinophyceae_XX;Dinophyceae_XXX;Dinophyceae_XXX_sp_;
Otu00537	0.00246553	17.6193	AF509625_1_1681_U	Eukaryota;Archaeplastida;Chlorophyta;Mamiellophyceae;Dolichomastigales;Dolichomastigaceae;Dolichomastix;Dolichomastix_tenuilepis;
Otu00308	0.0531231	17.6123	DQ120009_1_1729_U	Eukaryota;Alveolata;Ciliophora;CONThreeP;CONThreeP_X;CONThreeP_XX;Askenasia;Askenasia_sp_;
Otu01406	0.0286732	17.6029	EU793927_1_1573_U	Eukaryota;Alveolata;Dinoflagellata;Syndiniales;Dino-Group-II;Dino-Group-II-Clade-10-and-11;Dino-Group-II-Clade-10-and-11_X;Dino-Group-II-Clade-10-and-11_X_sp_;
Otu00610	0.0786459	17.5134	KT861015_1_1626_U	Eukaryota;Stramenopiles;Ochrophyta;Bacillariophyta;Bacillariophyta_X;Radial-centric-basal-Coscinodiscophyceae;Guinardia;Guinardia_striata;
Otu00166	0.0110492	17.4922	KJ759352_1_1798_U	Eukaryota;Alveolata;Dinoflagellata;Dinophyceae;Dinophyceae_X;Dinophyceae_XX;Dinophyceae_XXX;Dinophyceae_XXX_sp_;
Otu00450	0.0221213	17.4648	EF173001_1_1670_U	Eukaryota;Opisthokonta;Choanoflagellida;Choanoflagellida_X;Choanoflagellida_XX;Choanoflagellida_XX_Clade-3;Choanoflagellida_XX_Clade-3_X;Choanoflagellida_XX_Clade-3_X_sp_;
Otu00349	0.0100676	17.4595	KJ763689_1_1799_U	Eukaryota;Alveolata;Dinoflagellata;Syndiniales;Dino-Group-II;Dino-Group-II-Clade-5;Dino-Group-II-Clade-5_X;Dino-Group-II-Clade-5_X_sp_;
Otu00373	0.00506804	17.4395	FN562439_1_1784_U	Eukaryota;Archaeplastida;Chlorophyta;Pyramimonadophyceae;Pyramimonadales;Halosphaeraceae;Halosphaera;Halosphaera_sp_;
Otu00620	0.0022829	17.4216	KT860924_1_1252_U	Eukaryota;Archaeplastida;Prasinodermophyta;Palmophyllophyceae;Prasinococcales;Prasinococcaceae;Prasinococcus;Prasinococcus_capsulatus;
Otu00695	0.00175783	17.3871	FJ422993_1_1778_U	Eukaryota;Alveolata;Ciliophora;Spirotrichea;Strombidiida;Tontoniidae_B;Pseudotontonia;Pseudotontonia_simplicidens;
Otu00151	0.0920693	17.3526	HQ394116_1_811_U	Eukaryota;Alveolata;Ciliophora;CONThreeP;CONThreeP_X;CONThreeP_XX;Askenasia;Askenasia_sp_;
Otu00499	0.00340152	17.331	HQ393994_1_831_U	Eukaryota;Alveolata;Dinoflagellata;Dinophyceae;Dinophyceae_X;Dinophyceae_XX;Dinophyceae_XXX;Dinophyceae_XXX_sp_;
Otu00630	0.00347001	17.2676	KJ760688_1_1793_U	Eukaryota;Stramenopiles;Ochrophyta;Bacillariophyta;Bacillariophyta_X;Raphid-pennate;Raphid-pennate_X;Raphid-pennate_X_sp_;
Otu00816	0.00609534	17.2654	JX188346_1_1760_U	Eukaryota;Alveolata;Dinoflagellata;Syndiniales;Dino-Group-II;Dino-Group-II-Clade-13;Dino-Group-II-Clade-13_X;Dino-Group-II-Clade-13_X_sp_;
Otu01275	0.0222126	17.2412	KF130053_1_1754_U	Eukaryota;Alveolata;Dinoflagellata;Syndiniales;Dino-Group-II;Dino-Group-II-Clade-17;Dino-Group-II-Clade-17_X;Dino-Group-II-Clade-17_X_sp_;
Otu00443	0.00463429	17.2063	KF130056_1_1743_U	Eukaryota;Stramenopiles;Ochrophyta;Chrysophyceae;Chrysophyceae_X;Chrysophyceae_Clade-H;Chrysophyceae_Clade-H_X;Chrysophyceae_Clade-H_X_sp_;
Otu00912	0.0101132	17.1531	EF526772_1_1322_U	Eukaryota;Stramenopiles;Ochrophyta;Bacillariophyta;Bacillariophyta_X;Polar-centric-Mediophyceae;Chaetoceros;Chaetoceros_muellerii;
Otu00264	0.00821844	16.999	AJ236027_1_1766_U	Eukaryota;Archaeplastida;Streptophyta;Embryophyceae;Embryophyceae_X;Embryophyceae_XX;Pentas;Pentas_lanceolata;
Otu00440	0.00200895	16.9825	AY426842_1_1779_U	Eukaryota;Opisthokonta;Choanoflagellida;Choanoflagellatea;Craspedida;Monosigidae_Group_B;Monosigidae_Group_B_X;Monosigidae_Group_B_X_sp_;
Otu00905	0.00349284	16.8774	AY216904_1_1796_U	Eukaryota;Stramenopiles;Ochrophyta;Bacillariophyta;Bacillariophyta_X;Araphid-pennate;Asterionellopsis;Asterionellopsis_glacialis;
Otu01902	0.00360698	16.8676	JQ956270_1_1617_U	Eukaryota;Alveolata;Ciliophora;Phyllopharyngea;Cyrtophoria_1;PHYLL_4;PHYLL_4_X;PHYLL_4_X_sp_;
Otu00562	0.00636929	16.8596	KF130083_1_1757_U	Eukaryota;Alveolata;Dinoflagellata;Syndiniales;Dino-Group-II;Dino-Group-II-Clade-17;Dino-Group-II-Clade-17_X;Dino-Group-II-Clade-17_X_sp_;
Otu00423	0.0368003	16.7722	AY919715_1_1712_U	Eukaryota;Alveolata;Ciliophora;Spirotrichea;Hypotrichia;Halteriidae;Halteriidae_X;Halteriidae_X_sp_;
Otu00116	0.0747193	16.7696	AM490984_1_1724_U	Eukaryota;Hacrobia;Haptophyta;Prymnesiophyceae;Zygodiscales;Pontosphaeraceae;Scyphosphaera;Scyphosphaera_apsteinii;
Otu00369	0.00182632	16.7539	EU446341_1_1537_U	Eukaryota;Opisthokonta;Choanoflagellida;Choanoflagellatea;Acanthoecida;Stephanoecidae_Group_I;Stephanoecidae_Group_I_X;Stephanoecidae_Group_I_X_sp_;
Otu01488	0.00246553	16.7106	KF130028_1_1748_U	Eukaryota;Alveolata;Dinoflagellata;Syndiniales;Dino-Group-I;Dino-Group-I-Clade-5;Dino-Group-I-Clade-5_X;Dino-Group-I-Clade-5_X_sp_;
Otu00533	0.000935989	16.6436	JQ782083_1_1749_U	Eukaryota;Stramenopiles;Pseudofungi;MAST-2;MAST-2D;MAST-2D_X;MAST-2D_XX;MAST-2D_XX_sp_;
Otu01210	0.00392659	16.6389	KF129839_1_1764_U	Eukaryota;Stramenopiles;Opalozoa;MAST-12;MAST-12D;MAST-12D_X;MAST-12D_XX;MAST-12D_XX_sp_;
Otu00041	0.291618	16.6108	FJ032668_1_1715_U	Eukaryota;Alveolata;Dinoflagellata;Syndiniales;Dino-Group-I;Dino-Group-I-Clade-1;Dino-Group-I-Clade-1_X;Dino-Group-I-Clade-1_X_sp_;
Otu00532	0.00189481	16.5204	KJ763295_1_1800_U	Eukaryota;Alveolata;Dinoflagellata;Dinophyceae;Gonyaulacales;Ceratiaceae;Tripos;Tripos_fusus;
Otu00418	0.0267099	16.4713	EF173016_1_1674_U	Eukaryota;Alveolata;Dinoflagellata;Syndiniales;Dino-Group-II;Dino-Group-II-Clade-1;Dino-Group-II-Clade-1_X;Dino-Group-II-Clade-1_X_sp_;
Otu00087	0.0273491	16.4452	AY651090_1_1700_U	Eukaryota;Stramenopiles;Ochrophyta;Chrysophyceae;Chrysophyceae_X;Chrysophyceae_Clade-F;Chrysophyceae_Clade-F_X;Chrysophyceae_Clade-F_X_sp_;
Otu00492	0.00182632	16.4103	KF130275_1_1762_U	Eukaryota;Alveolata;Dinoflagellata;Syndiniales;Dino-Group-III;Dino-Group-III_X;Dino-Group-III_XX;Dino-Group-III_XX_sp_;
Otu00678	0.00205461	16.3968	AB275037_1_1702_U	Eukaryota;Stramenopiles;Pseudofungi;MAST-1;MAST-1C;MAST-1C_X;MAST-1C_XX;MAST-1C_XX_sp_;
Otu00759	0.00394942	16.3457	AB973535_1_1677_U	Eukaryota;Stramenopiles;Sagenista;Labyrinthulomycetes;Oblongichytrida;Oblongichytridiaceae;Oblongichytrium;Oblongichytrium_sp_;
Otu00820	0.0121907	16.3301	KF129639_1_1754_U	Eukaryota;Alveolata;Dinoflagellata;Syndiniales;Dino-Group-II;Dino-Group-II_X;Dino-Group-II_XX;Dino-Group-II_XX_sp_;
Otu00228	0.00365264	16.3265	KF130564_1_1762_U	Eukaryota;Hacrobia;Haptophyta;Prymnesiophyceae;Prymnesiales;Prymnesiophyceae_Clade_B4;Prymnesiophyceae_Clade_B4_X;Prymnesiophyceae_Clade_B4_X_sp_;
Otu00100	0.00821844	16.3224	EU333080_1_800_U	Eukaryota;Alveolata;Dinoflagellata;Dinophyceae;Dinophyceae_X;Dinophyceae_XX;Dinophyceae_XXX;Dinophyceae_XXX_sp_;
Otu00274	0.103119	16.3012	EU333101_1_800_U	Eukaryota;Alveolata;Ciliophora;Spirotrichea;Tintinnida;Eutintinnidae;Eutintinnidae_X;Eutintinnidae_X_sp_;
Otu00207	0.00388093	16.2909	AM491021_1_1787_U	Eukaryota;Hacrobia;Haptophyta;Prymnesiophyceae;Prymnesiales;Chrysochromulinaceae;Chrysochromulina;Chrysochromulina_simplex;
Otu00078	0.0577117	16.2435	KJ763489_1_1801_U	Eukaryota;Alveolata;Dinoflagellata;Syndiniales;Dino-Group-II;Dino-Group-II-Clade-1;Dino-Group-II-Clade-1_X;Dino-Group-II-Clade-1_X_sp_;
Otu01009	0.0031504	16.1664	KJ761044_1_1802_U	Eukaryota;Alveolata;Dinoflagellata;Syndiniales;Dino-Group-II;Dino-Group-II-Clade-10-and-11;Dino-Group-II-Clade-10-and-11_X;Dino-Group-II-Clade-10-and-11_X_sp_;
Otu00109	0.0467081	16.1388	JQ226361_1_1614_U	Eukaryota;Alveolata;Dinoflagellata;Dinophyceae;Dinophyceae_X;Dinophyceae_XX;Dinophyceae_XXX;Dinophyceae_XXX_sp_;
Otu00333	0.030043	16.0458	AJ402338_1_1758_U	Eukaryota;Alveolata;Dinoflagellata;Syndiniales;Dino-Group-II;Dino-Group-II-Clade-1;Dino-Group-II-Clade-1_X;Dino-Group-II-Clade-1_X_sp_;
Otu00500	0.00289928	15.9535	KJ759431_1_1796_U	Eukaryota;Alveolata;Dinoflagellata;Syndiniales;Dino-Group-II;Dino-Group-II-Clade-1;Dino-Group-II-Clade-1_X;Dino-Group-II-Clade-1_X_sp_;
Otu00671	0.00335586	15.9241	AB284575_1_1784_U	Eukaryota;Stramenopiles;Pseudofungi;Oomycota;Oomycota_X;Atkinsiellales;Atkinsiella;Atkinsiella_dubia;
Otu00269	0.00506804	15.8776	KF791348_1_1619_U	Eukaryota;Alveolata;Dinoflagellata;Syndiniales;Dino-Group-II;Dino-Group-II-Clade-12;Dino-Group-II-Clade-12_X;Dino-Group-II-Clade-12_X_sp_;
Otu00252	0.00349284	15.849	AB275037_1_1702_U	Eukaryota;Stramenopiles;Pseudofungi;MAST-1;MAST-1C;MAST-1C_X;MAST-1C_XX;MAST-1C_XX_sp_;
Otu00345	0.0110264	15.828	KJ759326_1_1789_U	Eukaryota;Opisthokonta;Choanoflagellida;Choanoflagellida_X;Choanoflagellida_XX;Choanoflagellida_XXX;Choanoflagellida_XXXX;Choanoflagellida_XXXX_sp_;
Otu00277	0.00356132	15.8026	KJ759580_1_1800_U	Eukaryota;Alveolata;Dinoflagellata;Syndiniales;Dino-Group-III;Dino-Group-III_X;Dino-Group-III_XX;Dino-Group-III_XX_sp_;
Otu00231	0.00518218	15.8016	KJ759432_1_1798_U	Eukaryota;Alveolata;Dinoflagellata;Syndiniales;Dino-Group-III;Dino-Group-III_X;Dino-Group-III_XX;Dino-Group-III_XX_sp_;
Otu00804	0.00474843	15.7209	AY664882_1_1754_U	Eukaryota;Alveolata;Dinoflagellata;Dinophyceae;Dinophyceae_X;Dinophyceae_XX;Dinophyceae_XXX;Dinophyceae_XXX_sp_;
Otu00648	0.00883482	15.6843	EU793789_1_1508_U	Eukaryota;Alveolata;Dinoflagellata;Syndiniales;Dino-Group-II;Dino-Group-II-Clade-16;Dino-Group-II-Clade-16_X;Dino-Group-II-Clade-16_X_sp_;
Otu00596	0.00378961	15.6568	EF423419_1_1784_U	Eukaryota;Stramenopiles;Ochrophyta;Bacillariophyta;Bacillariophyta_X;Araphid-pennate;Thalassionema;Thalassionema_frauenfeldii;
Otu01025	0.00808146	15.6176	KJ760035_1_1801_U	Eukaryota;Alveolata;Dinoflagellata;Syndiniales;Dino-Group-II;Dino-Group-II-Clade-7;Dino-Group-II-Clade-7_X;Dino-Group-II-Clade-7_X_sp_;
Otu00226	0.00340152	15.6015	KC309535_1_1640_U	Eukaryota;Stramenopiles;Ochrophyta;Bacillariophyta;Bacillariophyta_X;Radial-centric-basal-Coscinodiscophyceae;Guinardia;Guinardia_flaccida;
Otu00628	0.00148388	15.5904	KJ762753_1_1798_U	Eukaryota;Alveolata;Dinoflagellata;Syndiniales;Dino-Group-II;Dino-Group-II-Clade-1;Dino-Group-II-Clade-1_X;Dino-Group-II-Clade-1_X_sp_;
Otu00534	0.00367547	15.5682	AB698451_1_1802_U	Eukaryota;Alveolata;Dinoflagellata;Dinophyceae;Gymnodiniales;Gymnodiniaceae;Gymnoxanthella;Gymnoxanthella_radiolariae;
Otu00135	0.0859283	15.5603	KF130069_1_1746_U	Eukaryota;Alveolata;Dinoflagellata;Syndiniales;Dino-Group-I;Dino-Group-I-Clade-4;Dino-Group-I-Clade-4_X;Dino-Group-I-Clade-4_X_sp_;
Otu00839	0.00374396	15.4931	DQ186527_1_1738_U	Eukaryota;Alveolata;Dinoflagellata;Syndiniales;Dino-Group-II;Dino-Group-II-Clade-4;Dino-Group-II-Clade-4_X;Dino-Group-II-Clade-4_X_sp_;
Otu00569	0.00166652	15.4464	KC488421_1_1698_U	Eukaryota;Alveolata;Dinoflagellata;Dinophyceae;Dinophyceae_X;Dinophyceae_XX;Dinophyceae_XXX;Dinophyceae_XXX_sp_;
Otu00622	0.00184915	15.4376	KC488440_1_1711_U	Eukaryota;Alveolata;Dinoflagellata;Dinophyceae;Dinophyceae_X;Dinophyceae_XX;Dinophyceae_XXX;Dinophyceae_XXX_sp_;
Otu00786	0.0244727	15.3889	AF022201_1_1803_U	Eukaryota;Alveolata;Dinoflagellata;Dinophyceae;Peridiniales;Thoracosphaeraceae;Pentapharsodinium;Pentapharsodinium_tyrrhenicum;
Otu00942	0.00728245	15.3602	KJ762914_1_1763_U	Eukaryota;Alveolata;Ciliophora;Spirotrichea;Strombidiida;Strombidiidae_L;Strombidiidae_L_X;Strombidiidae_L_X_sp_;
Otu00886	0.00125559	15.3553	AB781324_1_1745_U	Eukaryota;Alveolata;Dinoflagellata;Dinophyceae;Prorocentrales;Prorocentraceae;Prorocentrum;Prorocentrum_shikokuense;
Otu00296	0.0336956	15.3048	FR874699_1_1791_U	Eukaryota;Alveolata;Dinoflagellata;Syndiniales;Dino-Group-II;Dino-Group-II-Clade-32;Dino-Group-II-Clade-32_X;Dino-Group-II-Clade-32_X_sp_;
Otu00715	0.00226007	15.2902	FR865625_2_1771_U	Eukaryota;Alveolata;Dinoflagellata;Dinophyceae;Gonyaulacales;Gonyaulacaceae;Gonyaulax;Gonyaulax_spinifera;
Otu00503	0.00515935	15.2284	KJ762507_1_1793_U	Eukaryota;Alveolata;Dinoflagellata;Syndiniales;Dino-Group-I;Dino-Group-I-Clade-5;Dino-Group-I-Clade-5_X;Dino-Group-I-Clade-5_X_sp_;
Otu00580	0.0170989	15.2012	AB017126_1_1758_U	Eukaryota;Archaeplastida;Chlorophyta;Pyramimonadophyceae;Pyramimonadales;Pyramimonadales_X;Cymbomonas;Cymbomonas_tetramitiformis;
Otu00919	0.0464342	15.161	AB058391_1_1753_U	Eukaryota;Archaeplastida;Chlorophyta;Nephroselmidophyceae;Nephroselmidales;Nephroselmidales_X;Nephroselmis;Nephroselmis_pyriformis;
Otu01054	0.00091316	15.0943	KF129832_1_1755_U	Eukaryota;Alveolata;Dinoflagellata;Syndiniales;Dino-Group-II;Dino-Group-II-Clade-1;Dino-Group-II-Clade-1_X;Dino-Group-II-Clade-1_X_sp_;
Otu01918	0.0232856	15.0256	AB214976_1_2580_R	Eukaryota;Archaeplastida;Chlorophyta;Nephroselmidophyceae;Nephroselmidales;Nephroselmidales_X;Nephroselmis;Nephroselmis_viridis;
Otu00615	0.00132408	15.0179	EF526908_1_1342_U	Eukaryota;Alveolata;Dinoflagellata;Syndiniales;Dino-Group-II;Dino-Group-II-Clade-5;Dino-Group-II-Clade-5_X;Dino-Group-II-Clade-5_X_sp_;
Otu00164	0.25137	15.0136	KC583020_1_1788_U	Eukaryota;Stramenopiles;Ochrophyta;MOCH-5;MOCH-5_X;MOCH-5_XX;MOCH-5_XXX;MOCH-5_XXX_sp_;
Otu00552	0.00068487	15	JF791041_1_1777_U	Eukaryota;Hacrobia;Picozoa;Picozoa_X;Picozoa_XX;Picozoa_XXX;Picozoa_XXXX;Picozoa_XXXX_sp_;
Otu00802	0.00246553	14.802	AY642703_1_1745_U	Eukaryota;Alveolata;Ciliophora;CONThreeP;CONThreeP_X;CONThreeP_XX;Askenasia;Askenasia_sp_;
Otu00832	0.00162086	14.783	EU143396_1_902_U	Eukaryota;Archaeplastida;Chlorophyta;Mamiellophyceae;Dolichomastigales;Crustomastigaceae;Crustomastigaceae-AB;Crustomastigaceae-AB_sp_;
Otu00310	0.0010273	14.781	KJ759731_1_1795_U	Eukaryota;Alveolata;Dinoflagellata;Syndiniales;Dino-Group-II;Dino-Group-II-Clade-3;Dino-Group-II-Clade-3_X;Dino-Group-II-Clade-3_X_sp_;
Otu00882	0.00159803	14.759	KJ760014_1_1800_U	Eukaryota;Alveolata;Dinoflagellata;Syndiniales;Dino-Group-II;Dino-Group-II-Clade-7;Dino-Group-II-Clade-7_X;Dino-Group-II-Clade-7_X_sp_;
Otu00439	0.00125559	14.7561	EU446389_1_1555_U	Eukaryota;Alveolata;Dinoflagellata;Syndiniales;Dino-Group-II;Dino-Group-II-Clade-4;Dino-Group-II-Clade-4_X;Dino-Group-II-Clade-4_X_sp_;
Otu00301	0.110972	14.7532	EU446360_1_1531_U	Eukaryota;Opisthokonta;Fungi;Basidiomycota;Ustilaginomycotina;Exobasidiomycetes;Exobasidiomycetes_X;Exobasidiomycetes_X_sp_;
Otu00288	0.098256	14.694	AB058358_1_1749_U	Eukaryota;Hacrobia;Haptophyta;Prymnesiophyceae;Prymnesiales;Haptolina
Otu01150	0.00305909	14.6699	KF129737_1_1746_U	Eukaryota;Alveolata;Dinoflagellata;Syndiniales;Dino-Group-I;Dino-Group-I-Clade-4;Dino-Group-I-Clade-4_X;Dino-Group-I-Clade-4_X_sp_;
Otu00130	0.0929597	14.6229	KJ763420_1_1803_U	Eukaryota;Alveolata;Dinoflagellata;Syndiniales;Dino-Group-II;Dino-Group-II-Clade-22;Dino-Group-II-Clade-22_X;Dino-Group-II-Clade-22_X_sp_;
Otu00812	0.0510228	14.6192	EU793924_1_918_U	Eukaryota;Alveolata;Dinoflagellata;Syndiniales;Dino-Group-II;Dino-Group-II-Clade-4;Dino-Group-II-Clade-4_X;Dino-Group-II-Clade-4_X_sp_;
Otu00293	0.00226007	14.6066	EU446389_1_1555_U	Eukaryota;Alveolata;Dinoflagellata;Syndiniales;Dino-Group-II;Dino-Group-II-Clade-4;Dino-Group-II-Clade-4_X;Dino-Group-II-Clade-4_X_sp_;
Otu00101	0.0142681	14.5522	EU780609_1_1711_U	Eukaryota;Alveolata;Dinoflagellata;Dinophyceae;Prorocentrales;Prorocentraceae;Prorocentrum;Prorocentrum_sp_;
Otu00739	0.0138115	14.5358	KJ763310_1_1809_U	Eukaryota;Stramenopiles;Ochrophyta;MOCH-2;MOCH-2_X;MOCH-2_XX;MOCH-2_XXX;MOCH-2_XXX_sp_;
Otu00664	0.00068487	14.5161	AB183589_1_1734_U	Eukaryota;Archaeplastida;Chlorophyta;Mamiellophyceae;Mamiellales;Mamiellaceae;Micromonas;Micromonas_commoda_A1;
Otu00214	0.0210712	14.4957	AY665059_1_1720_U	Eukaryota;Alveolata;Ciliophora;Oligohymenophorea;OLIGO5;OLIGO5_X;OLIGO5_XX;OLIGO5_XX_sp_;
Otu00338	0.0188339	14.4823	AY524847_1_1712_U	Eukaryota;Opisthokonta;Fungi;Ascomycota;Pezizomycotina;Leotiomycetes;Rhizoscyphus;Rhizoscyphus_ericae;
Otu00365	0.0015752	14.4711	KF130043_1_1759_U	Eukaryota;Alveolata;Dinoflagellata;Syndiniales;Dino-Group-II;Dino-Group-II-Clade-4;Dino-Group-II-Clade-4_X;Dino-Group-II-Clade-4_X_sp_;
Otu01289	0.0120765	14.384	KM032344_1_1136_U	Eukaryota;Opisthokonta;Fungi;Ascomycota;Pezizomycotina;Sordariomycetes;Sordariomycetes_X;Sordariomycetes_X_sp_;
Otu00281	0.114145	14.3686	KJ762603_1_1796_U	Eukaryota;Alveolata;Dinoflagellata;Syndiniales;Dino-Group-II;Dino-Group-II-Clade-3;Dino-Group-II-Clade-3_X;Dino-Group-II-Clade-3_X_sp_;
Otu01440	0.00824127	14.3446	EU793706_1_1621_U	Eukaryota;Alveolata;Dinoflagellata;Syndiniales;Dino-Group-II;Dino-Group-II-Clade-1;Dino-Group-II-Clade-1_X;Dino-Group-II-Clade-1_X_sp_;
Otu00713	0.0386723	14.2916	MG972330_1_911_U	Eukaryota;Stramenopiles;Ochrophyta;Bacillariophyta;Bacillariophyta_X;Polar-centric-Mediophyceae;Chaetoceros;Chaetoceros_affinis;
Otu00317	0.0147247	14.2871	KJ763470_1_1798_U	Eukaryota;Alveolata;Dinoflagellata;Dinophyceae;Dinophyceae_X;Dinophyceae_XX;Dinophyceae_XXX;Dinophyceae_XXX_sp_;
Otu01480	0.0091316	14.2832	KF791348_1_1619_U	Eukaryota;Alveolata;Dinoflagellata;Syndiniales;Dino-Group-II;Dino-Group-II-Clade-12;Dino-Group-II-Clade-12_X;Dino-Group-II-Clade-12_X_sp_;
Otu01092	0.00155237	14.2716	KF130586_1_1759_U	Eukaryota;Alveolata;Dinoflagellata;Syndiniales;Dino-Group-II;Dino-Group-II-Clade-3;Dino-Group-II-Clade-3_X;Dino-Group-II-Clade-3_X_sp_;
Otu00411	0.0257055	14.2631	KJ760688_1_1793_U	Eukaryota;Stramenopiles;Ochrophyta;Bacillariophyta;Bacillariophyta_X;Raphid-pennate;Raphid-pennate_X;Raphid-pennate_X_sp_;
Otu00216	0.0580541	14.2591	EU793011_1_922_U	Eukaryota;Alveolata;Dinoflagellata;Syndiniales;Dino-Group-V;Dino-Group-V_X;Dino-Group-V_XX;Dino-Group-V_XX_sp_;
Otu00448	0.00255685	14.2545	KF130405_1_1756_U	Eukaryota;Alveolata;Dinoflagellata;Syndiniales;Dino-Group-II;Dino-Group-II-Clade-2;Dino-Group-II-Clade-2_X;Dino-Group-II-Clade-2_X_sp_;
Otu00229	0.0539906	14.2503	KU525757_1_1738_U	Eukaryota;Alveolata;Ciliophora;Spirotrichea;Choreotrichida;Lynnellidae;Lynnella;Lynnella_semiglobulosa;
Otu00496	0.00269382	14.2372	AY180031_1_1748_U	Eukaryota;Stramenopiles;Pseudofungi;Oomycota;Oomycota_X;Haliphthorales;Haliphthorales_X;Haliphthorales_X_sp_;
Otu00227	0.00312757	14.2297	AY485470_1_1660_U	Eukaryota;Stramenopiles;Ochrophyta;Bacillariophyta;Bacillariophyta_X;Radial-centric-basal-Coscinodiscophyceae;Proboscia;Proboscia_indica;
Otu00899	0.000981647	14.1145	EU793933_1_1559_U	Eukaryota;Alveolata;Dinoflagellata;Syndiniales;Dino-Group-II;Dino-Group-II-Clade-44;Dino-Group-II-Clade-44_X;Dino-Group-II-Clade-44_X_sp_;
Otu00588	0.000981647	14.1145	KJ759496_1_1802_U	Eukaryota;Stramenopiles;Ochrophyta;Bolidophyceae;Parmales;Triparmaceae;Triparma;Triparma_mediterranea;
Otu00915	0.00445165	14.1095	KJ762616_1_1797_U	Eukaryota;Alveolata;Dinoflagellata;Syndiniales;Dino-Group-II;Dino-Group-II-Clade-7;Dino-Group-II-Clade-7_X;Dino-Group-II-Clade-7_X_sp_;
Otu00563	0.00150671	14.0516	EU793927_1_1573_U	Eukaryota;Alveolata;Dinoflagellata;Syndiniales;Dino-Group-II;Dino-Group-II-Clade-10-and-11;Dino-Group-II-Clade-10-and-11_X;Dino-Group-II-Clade-10-and-11_X_sp_;
Otu00004	2.25439	14.0335	KJ758222_1_1798_U	Eukaryota;Alveolata;Dinoflagellata;Dinophyceae;Dinophyceae_X;Dinophyceae_XX;Dinophyceae_XXX;Dinophyceae_XXX_sp_;
Otu00922	0.0317323	14.0255	KJ759272_1_1797_U	Eukaryota;Alveolata;Dinoflagellata;Dinophyceae;Dinophyceae_X;Dinophyceae_XX;Dinophyceae_XXX;Dinophyceae_XXX_sp_;
Otu00593	0.00856087	14.0246	AB058391_1_1753_U	Eukaryota;Archaeplastida;Chlorophyta;Nephroselmidophyceae;Nephroselmidales;Nephroselmidales_X;Nephroselmis;Nephroselmis_pyriformis;
Otu00243	0.0420054	14.0224	KJ758109_1_1796_U	Eukaryota;Alveolata;Dinoflagellata;Dinophyceae;Gymnodiniales;Gymnodiniaceae;Gyrodinium;Gyrodinium_sp_;
Otu00850	0.00253402	14.0171	AB297470_1_1136_U	Eukaryota;Alveolata;Dinoflagellata;Noctilucophyceae;Noctilucales;Noctilucaceae;Noctiluca;Noctiluca_scintillans;
Otu00482	0.0102502	13.9584	KC488395_1_1666_U	Eukaryota;Alveolata;Ciliophora;Spirotrichea;Strombidiida;Strombidiidae_L;Strombidiidae_L_X;Strombidiidae_L_X_sp_;
Otu01306	0.00130125	13.9442	GQ995285_1_1777_U	Eukaryota;Opisthokonta;Fungi;Chytridiomycota;Chytridiomycotina;Chytridiomycetes;Spizellomycetales-and-Rhizophlyctidales;Spizellomycetales-and-Rhizophlyctidales_sp_;
Otu00421	0.00650626	13.9394	FJ537660_1_805_U	Eukaryota;Alveolata;Dinoflagellata;Syndiniales;Dino-Group-II;Dino-Group-II-Clade-10-and-11;Dino-Group-II-Clade-10-and-11_X;Dino-Group-II-Clade-10-and-11_X_sp_;
Otu00873	0.000753357	13.7848	KJ763229_1_1798_U	Eukaryota;Alveolata;Dinoflagellata;Dinophyceae;Dinophyceae_X;Dinophyceae_XX;Dinophyceae_XXX;Dinophyceae_XXX_sp_;
Otu01439	0.00908594	13.7815	KC582901_1_1792_U	Eukaryota;Alveolata;Dinoflagellata;Syndiniales;Dino-Group-II;Dino-Group-II-Clade-44;Dino-Group-II-Clade-44_X;Dino-Group-II-Clade-44_X_sp_;
Otu00667	0.00148388	13.7622	AB363063_1_1731_U	Eukaryota;Stramenopiles;Pseudofungi;Oomycota;Oomycota_X;Olpidophydiales;Olpidiopsis;Olpidiopsis_sp_;
Otu00375	0.00753357	13.7396	KJ757436_1_1799_U	Eukaryota;Alveolata;Dinoflagellata;Syndiniales;Dino-Group-III;Dino-Group-III_X;Dino-Group-III_XX;Dino-Group-III_XX_sp_;
Otu01079	0.00221441	13.7358	EU143506_1_906_U	Eukaryota;Archaeplastida;Chlorophyta;Prasino-Clade-VIII;Prasino-Clade-VIII_X;Prasino-Clade-VIII_XX;Prasino-Clade-VIII_XXX;Prasino-Clade-VIII_XXX_sp_;
Otu01200	0.00783035	13.7232	JF791099_1_1777_U	Eukaryota;Alveolata;Dinoflagellata;Syndiniales;Dino-Group-I;Dino-Group-I-Clade-1;Dino-Group-I-Clade-1_X;Dino-Group-I-Clade-1_X_sp_;
Otu00597	0.00210027	13.6958	EU793924_1_918_U	Eukaryota;Alveolata;Dinoflagellata;Syndiniales;Dino-Group-II;Dino-Group-II-Clade-4;Dino-Group-II-Clade-4_X;Dino-Group-II-Clade-4_X_sp_;
Otu00022	5.00236	13.6916	KC582999_1_2114_U	Eukaryota;Stramenopiles;Ochrophyta;Chrysophyceae;Chrysophyceae_X;Chrysophyceae_Clade-H;Chrysophyceae_Clade-H_X;Chrysophyceae_Clade-H_X_sp_;
Otu00980	0.00125559	13.6878	JF791081_1_1777_U	Eukaryota;Apusozoa;Hilomonadea;Planomonadida;Planomonadidae;Planomonadidae_Group-1;Ancyromonas;Ancyromonas_micra;
Otu00817	0.00353849	13.6739	EF526728_1_1553_U	Eukaryota;Opisthokonta;Choanoflagellida;Choanoflagellatea;Acanthoecida;Stephanoecidae_Group_H;Stephanoecidae_Group_H_X;Stephanoecidae_Group_H_X_sp_;
Otu00603	0.00675738	13.6474	KF129820_1_1756_U	Eukaryota;Alveolata;Dinoflagellata;Syndiniales;Dino-Group-II;Dino-Group-II-Clade-14;Dino-Group-II-Clade-14_X;Dino-Group-II-Clade-14_X_sp_;
Otu00540	0.00248836	13.6406	KJ760404_1_1796_U	Eukaryota;Alveolata;Dinoflagellata;Syndiniales;Dino-Group-II;Dino-Group-II-Clade-17;Dino-Group-II-Clade-17_X;Dino-Group-II-Clade-17_X_sp_;
Otu00657	0.0170076	13.6333	KF130222_1_1745_U	Eukaryota;Alveolata;Dinoflagellata;Syndiniales;Dino-Group-I;Dino-Group-I-Clade-5;Dino-Group-I-Clade-5_X;Dino-Group-I-Clade-5_X_sp_;
Otu00498	0.00415488	13.6201	EU144007_1_800_U	Eukaryota;Opisthokonta;Fungi;Fungi_X;Fungi_XX;Fungi_XXX;Fungi_XXXX;Fungi_XXXX_sp_;
Otu01313	0.00436034	13.6072	EU780591_1_1638_U	Eukaryota;Alveolata;Dinoflagellata;Syndiniales;Dino-Group-II;Dino-Group-II-Clade-7;Dino-Group-II-Clade-7_X;Dino-Group-II-Clade-7_X_sp_;
Otu00456	0.00534199	13.5736	AF167153_1_1799_U	Eukaryota;Stramenopiles;Ochrophyta;Bolidophyceae;Parmales;Triparmaceae;Triparma;Triparma_eleuthera;
Otu01258	0.0112319	13.5156	KF129639_1_1754_U	Eukaryota;Alveolata;Dinoflagellata;Syndiniales;Dino-Group-II;Dino-Group-II_X;Dino-Group-II_XX;Dino-Group-II_XX_sp_;
Otu00869	0.000981647	13.4964	AF509625_1_1681_U	Eukaryota;Archaeplastida;Chlorophyta;Mamiellophyceae;Dolichomastigales;Dolichomastigaceae;Dolichomastix;Dolichomastix_tenuilepis;
Otu00612	0.026961	13.4917	KC582890_1_1797_U	Eukaryota;Alveolata;Dinoflagellata;Syndiniales;Dino-Group-II;Dino-Group-II-Clade-10-and-11;Dino-Group-II-Clade-10-and-11_X;Dino-Group-II-Clade-10-and-11_X_sp_;
Otu00215	0.0133778	13.4612	KC488447_1_1677_U	Eukaryota;Alveolata;Dinoflagellata;Dinophyceae;Dinophyceae_X;Dinophyceae_XX;Dinophyceae_XXX;Dinophyceae_XXX_sp_;
Otu00280	0.0330564	13.438	KM886380_1_1717_U	Eukaryota;Alveolata;Dinoflagellata;Dinophyceae;Gonyaulacales;Goniodomataceae;Goniodoma;Goniodoma_polyedricum;
Otu00309	0.00239704	13.4287	KJ759323_1_1791_U	Eukaryota;Alveolata;Dinoflagellata;Dinophyceae;Dinophyceae_X;Dinophyceae_XX;Dinophyceae_XXX;Dinophyceae_XXX_sp_;
Otu00266	0.00257968	13.4269	AB275037_1_1702_U	Eukaryota;Stramenopiles;Pseudofungi;MAST-1;MAST-1C;MAST-1C_X;MAST-1C_XX;MAST-1C_XX_sp_;
Otu00235	0.0665009	13.4255	EU793467_1_1035_U	Eukaryota;Alveolata;Dinoflagellata;Syndiniales;Dino-Group-II;Dino-Group-II-Clade-8;Dino-Group-II-Clade-8_X;Dino-Group-II-Clade-8_X_sp_;
Otu00392	0.00127842	13.4017	KF130359_1_1759_U	Eukaryota;Alveolata;Dinoflagellata;Dinophyceae;Dinophyceae_X;Dinophyceae_XX;Dinophyceae_XXX;Dinophyceae_XXX_sp_;
Otu00931	0.00687153	13.3926	KF534571_1_528_U	Eukaryota;Alveolata;Ciliophora;Phyllopharyngea;Cyrtophoria_1;PHYLL_4;PHYLL_4_X;PHYLL_4_X_sp_;
Otu00326	0.00248836	13.3046	EF527109_1_1755_U	Eukaryota;Alveolata;Dinoflagellata;Dinophyceae;Gonyaulacales;Ceratiaceae;Ceratium;Ceratium_sp_;
Otu00428	0.00356132	13.2984	KF129896_1_1760_U	Eukaryota;Alveolata;Dinoflagellata;Syndiniales;Dino-Group-II;Dino-Group-II-Clade-5;Dino-Group-II-Clade-5_X;Dino-Group-II-Clade-5_X_sp_;
Otu00778	0.0280112	13.2919	KJ759652_1_1797_U	Eukaryota;Alveolata;Dinoflagellata;Dinophyceae;Dinophyceae_X;Dinophyceae_XX;Dinophyceae_XXX;Dinophyceae_XXX_sp_;
Otu00139	0.356064	13.2787	EU792993_1_918_U	Eukaryota;Alveolata;Dinoflagellata;Syndiniales;Dino-Group-II;Dino-Group-II-Clade-19;Dino-Group-II-Clade-19_X;Dino-Group-II-Clade-19_X_sp_;
Otu00626	0.00125559	13.2096	AACY020216037_2_1466_U	Eukaryota;Alveolata;Dinoflagellata;Syndiniales;Dino-Group-II;Dino-Group-II-Clade-10-and-11;Dino-Group-II-Clade-10-and-11_X;Dino-Group-II-Clade-10-and-11_X_sp_;
Otu00490	0.00120994	13.1878	KJ759570_1_1784_U	Eukaryota;Alveolata;Dinoflagellata;Syndiniales;Dino-Group-I;Dino-Group-I-Clade-5;Dino-Group-I-Clade-5_X;Dino-Group-I-Clade-5_X_sp_;
Otu00541	0.0014154	13.1644	EU333034_1_800_U	Eukaryota;Alveolata;Dinoflagellata;Syndiniales;Dino-Group-II;Dino-Group-II-Clade-3;Dino-Group-II-Clade-3_X;Dino-Group-II-Clade-3_X_sp_;
Otu00064	0.103393	13.1466	AF109324_1_1676_U	Eukaryota;Stramenopiles;Ochrophyta;Chrysophyceae;Chrysophyceae_X;Chrysophyceae_Clade-F;Paraphysomonas;Paraphysomonas_imperforata;
Otu00223	0.0151585	13.1274	FJ537342_1_1758_U	Eukaryota;Hacrobia;Haptophyta;Haptophyta_Clade_HAP2;Haptophyta_Clade_HAP2_X;Haptophyta_Clade_HAP2_XX;Haptophyta_Clade_HAP2_XXX;Haptophyta_Clade_HAP2_XXX_sp_;
Otu00353	0.0045658	13.1234	AY425318_1_1734_U	Eukaryota;Archaeplastida;Chlorophyta;Mamiellophyceae;Mamiellales;Mamiellaceae;Micromonas;Micromonas_clade_B4;
Otu00248	0.00374396	13.12	JX188283_1_1756_U	Eukaryota;Alveolata;Dinoflagellata;Syndiniales;Dino-Group-II;Dino-Group-II-Clade-16;Dino-Group-II-Clade-16_X;Dino-Group-II-Clade-16_X_sp_;
Otu00140	0.0779154	13.12	AJ506975_1_1801_U	Eukaryota;Alveolata;Dinoflagellata;Dinophyceae;Dinophysiales;Oxyphysiaceae;Phalachroma;Phalacroma_rotundatum;
Otu01134	0.00417771	13.1072	KF129999_1_1757_U	Eukaryota;Alveolata;Dinoflagellata;Syndiniales;Dino-Group-II;Dino-Group-II-Clade-16;Dino-Group-II-Clade-16_X;Dino-Group-II-Clade-16_X_sp_;
Otu00410	0.0296092	13.1049	AY664990_1_1754_U	Eukaryota;Alveolata;Dinoflagellata;Syndiniales;Dino-Group-II;Dino-Group-II-Clade-10-and-11;Dino-Group-II-Clade-10-and-11_X;Dino-Group-II-Clade-10-and-11_X_sp_;
Otu01900	0.0240161	13.0903	MG972215_1_1745_U	Eukaryota;Stramenopiles;Ochrophyta;Bacillariophyta;Bacillariophyta_X;Polar-centric-Mediophyceae;Chaetoceros;Chaetoceros_brevis_2;
Otu00824	0.0663182	13.0886	KT792925_1_1293_U	Eukaryota;Alveolata;Ciliophora;Spirotrichea;Tintinnida;Eutintinnidae;Eutintinnus;Eutintinnus_medius;
Otu00157	0.0254543	13.0324	DQ103777_1_1786_U	Eukaryota;Stramenopiles;Sagenista;Labyrinthulomycetes;Labyrinthulida;Labyrinthulaceae;Aplanochytrium;Aplanochytrium_sp_;
Otu00627	0.000935989	13.031	JQ781950_1_1809_U	Eukaryota;Stramenopiles;Opalozoa;MAST-3;MAST-3E;MAST-3E_X;MAST-3E_XX;MAST-3E_XX_sp_;
Otu01161	0.0248608	12.9988	KC670135_1_1742_U	Eukaryota;Opisthokonta;Fungi;Basidiomycota;Ustilaginomycotina;Exobasidiomycetes;Exobasidiomycetes_X;Exobasidiomycetes_X_sp_;
Otu00789	0.00285362	12.9668	EU293236_1_1755_U	Eukaryota;Alveolata;Dinoflagellata;Dinophyceae;Gymnodiniales;Gymnodiniaceae;Apicoporus;Apicoporus_parvidiaboli;
Otu00462	0.00130125	12.9442	AB275037_1_1702_U	Eukaryota;Stramenopiles;Pseudofungi;MAST-1;MAST-1C;MAST-1C_X;MAST-1C_XX;MAST-1C_XX_sp_;
Otu00384	0.00278514	12.9426	EU330214_1_848_U	Eukaryota;Archaeplastida;Chlorophyta;Mamiellophyceae;Dolichomastigales;Dolichomastigaceae;Dolichomastix;Dolichomastix_tenuilepis;
Otu00731	0.0139713	12.8541	AY664989_1_1756_U	Eukaryota;Alveolata;Dinoflagellata;Syndiniales;Dino-Group-II;Dino-Group-II-Clade-10-and-11;Dino-Group-II-Clade-10-and-11_X;Dino-Group-II-Clade-10-and-11_X_sp_;
Otu02139	0.0176696	12.8496	AY541683_1_1683_U	Eukaryota;Alveolata;Ciliophora;Spirotrichea;Choreotrichida;Strobilidiidae_I;Pelagostrobilidium;Pelagostrobilidium_neptuni;
Otu00545	0.000776186	12.8444	AY885029_1_1278_U	Eukaryota;Alveolata;Dinoflagellata;Syndiniales;Dino-Group-II;Dino-Group-II-Clade-39;Dino-Group-II-Clade-39_X;Dino-Group-II-Clade-39_X_sp_;
Otu01058	0.00406356	12.8172	KJ759318_1_1800_U	Eukaryota;Alveolata;Dinoflagellata;Syndiniales;Dino-Group-II;Dino-Group-II-Clade-8;Dino-Group-II-Clade-8_X;Dino-Group-II-Clade-8_X_sp_;
Otu01155	0.0047256	12.8099	KJ759700_1_1787_U	Eukaryota;Alveolata;Dinoflagellata;Syndiniales;Dino-Group-II;Dino-Group-II-Clade-13;Dino-Group-II-Clade-13_X;Dino-Group-II-Clade-13_X_sp_;
Otu02146	0.00221441	12.8014	KC582992_1_1792_U	Eukaryota;Stramenopiles;Opalozoa;MAST-3;MAST-3L;MAST-3L_X;MAST-3L_XX;MAST-3L_XX_sp_;
Otu00889	0.00200895	12.7789	EU143405_1_895_U	Eukaryota;Archaeplastida;Chlorophyta;Mamiellophyceae;Dolichomastigales;Dolichomastigaceae;Dolichomastix;Dolichomastix_tenuilepis;
Otu01456	0.00506804	12.7679	KJ763175_1_1759_U	Eukaryota;Alveolata;Ciliophora;Spirotrichea;Choreotrichida;Strobilidiidae_I;Pelagostrobilidium;Pelagostrobilidium_sp_;
Otu01042	0.0024427	12.707	KF129849_1_1758_U	Eukaryota;Alveolata;Dinoflagellata;Syndiniales;Dino-Group-II;Dino-Group-II-Clade-6;Dino-Group-II-Clade-6_X;Dino-Group-II-Clade-6_X_sp_;
Otu00936	0.010547	12.6643	AB158370_1_1763_U	Eukaryota;Hacrobia;Haptophyta;Prymnesiophyceae;Calcihaptophycidae;Chrysoculteraceae;Chrysoculter;Chrysoculter_rhomboideus;
Otu00717	0.00515935	12.6551	AY664882_1_1754_U	Eukaryota;Alveolata;Dinoflagellata;Dinophyceae;Dinophyceae_X;Dinophyceae_XX;Dinophyceae_XXX;Dinophyceae_XXX_sp_;
Otu00672	0.00175783	12.6418	KJ757778_1_1800_U	Eukaryota;Alveolata;Dinoflagellata;Dinophyceae;Dinophyceae_X;Dinophyceae_XX;Dinophyceae_XXX;Dinophyceae_XXX_sp_;
Otu00099	0.759315	12.615	DQ388466_1_1701_U	Eukaryota;Alveolata;Dinoflagellata;Dinophyceae;Suessiales;Suessiaceae;Protodinium;Protodinium_simplex;
Otu00464	0.0176925	12.5962	KF130495_1_1710_U	Eukaryota;Alveolata;Ciliophora;Nassophorea;Nassophorea_X;Discotrichidae;NASSO_1;NASSO_1_sp_;
Otu00733	0.00422336	12.5781	KJ763420_1_1803_U	Eukaryota;Alveolata;Dinoflagellata;Syndiniales;Dino-Group-II;Dino-Group-II-Clade-22;Dino-Group-II-Clade-22_X;Dino-Group-II-Clade-22_X_sp_;
Otu01781	0.0235595	12.5527	JQ924053_1_1757_U	Eukaryota;Alveolata;Ciliophora;Spirotrichea;Tintinnida;Dictyocystidae;Codonellopsis;Codonellopsis_gaussi;
Otu01111	0.00125559	12.5519	KJ760035_1_1801_U	Eukaryota;Alveolata;Dinoflagellata;Syndiniales;Dino-Group-II;Dino-Group-II-Clade-7;Dino-Group-II-Clade-7_X;Dino-Group-II-Clade-7_X_sp_;
Otu00419	0.0199069	12.5501	KF129830_1_1759_U	Eukaryota;Alveolata;Dinoflagellata;Syndiniales;Dino-Group-II;Dino-Group-II_X;Dino-Group-II_XX;Dino-Group-II_XX_sp_;
Otu00029	1.5494	12.5393	AB120001_1_1725_U	Eukaryota;Alveolata;Dinoflagellata;Dinophyceae;Gymnodiniales;Gymnodiniaceae;Gyrodinium;Gyrodinium_spirale;
Otu00974	0.000547896	12.5217	KJ763295_1_1800_U	Eukaryota;Alveolata;Dinoflagellata;Dinophyceae;Gonyaulacales;Ceratiaceae;Tripos;Tripos_fusus;
Otu00346	0.00595837	12.5016	KF130527_1_1757_U	Eukaryota;Alveolata;Dinoflagellata;Syndiniales;Dino-Group-II;Dino-Group-II-Clade-1;Dino-Group-II-Clade-1_X;Dino-Group-II-Clade-1_X_sp_;
Otu00795	0.00091316	12.5	AF509625_1_1681_U	Eukaryota;Archaeplastida;Chlorophyta;Mamiellophyceae;Dolichomastigales;Dolichomastigaceae;Dolichomastix;Dolichomastix_tenuilepis;
Otu00219	0.0054333	12.4932	AB178865_1_1782_U	Eukaryota;Stramenopiles;Pseudofungi;Oomycota;Oomycota_X;Haliphthorales;Haliphthoros;Haliphthoros_sp_;
Otu00113	0.810749	12.4705	AB058392_1_1752_U	Eukaryota;Archaeplastida;Chlorophyta;Chlorodendrophyceae;Chlorodendrales;Chlorodendraceae;Tetraselmis;Tetraselmis_sp_;
Otu00285	0.004406	12.462	AF509625_1_1681_U	Eukaryota;Archaeplastida;Chlorophyta;Mamiellophyceae;Dolichomastigales;Dolichomastigaceae;Dolichomastix;Dolichomastix_tenuilepis;
Otu00315	0.020158	12.4609	AB032622_1_1782_U	Eukaryota;Opisthokonta;Fungi;Basidiomycota;Agaricomycotina;Tremellomycetes;Cryptococcus;Cryptococcus_ater;
Otu00590	0.00116428	12.445	MF527268_1_1717_U	Eukaryota;Alveolata;Ciliophora;Spirotrichea;Strombidiida;Strombidiidae_K;Strombidium_K;Strombidium_K_sp_;
Otu00233	0.0565246	12.3126	JN871721_1_1747_U	Eukaryota;Alveolata;Ciliophora;Spirotrichea;Tintinnida;Eutintinnidae;Eutintinnus;Eutintinnus_tenuis;
Otu00273	0.00105013	12.3023	KF130359_1_1759_U	Eukaryota;Alveolata;Dinoflagellata;Dinophyceae;Dinophyceae_X;Dinophyceae_XX;Dinophyceae_XXX;Dinophyceae_XXX_sp_;
Otu01903	0.000776186	12.2979	MG972282_1_1712_U	Eukaryota;Stramenopiles;Ochrophyta;Bacillariophyta;Bacillariophyta_X;Polar-centric-Mediophyceae;Chaetoceros;Chaetoceros_lauderi;
Otu00336	0.00289928	12.2841	KJ762603_1_1796_U	Eukaryota;Alveolata;Dinoflagellata;Syndiniales;Dino-Group-II;Dino-Group-II-Clade-3;Dino-Group-II-Clade-3_X;Dino-Group-II-Clade-3_X_sp_;
Otu00424	0.0170076	12.19	KJ759363_1_1798_U	Eukaryota;Alveolata;Dinoflagellata;Dinophyceae;Dinophyceae_X;Dinophyceae_XX;Dinophyceae_XXX;Dinophyceae_XXX_sp_;
Otu00179	0.0711352	12.1892	AB505557_1_1729_U	Eukaryota;Stramenopiles;Stramenopiles_X;Stramenopiles_XX;Stramenopiles_XXX;Stramenopiles_XXXX;Stramenopiles_XXXXX;Stramenopiles_XXXXX_sp_;
Otu00091	0.252238	12.1849	DQ388462_1_1709_U	Eukaryota;Alveolata;Dinoflagellata;Dinophyceae;Gonyaulacales;Ceratiaceae;Tripos;Tripos_longipes;
Otu00393	0.103758	12.148	JX178772_1_1762_U	Eukaryota;Alveolata;Ciliophora;Spirotrichea;Strombidiida;Strombidiidae_K;Strombidium_K;Strombidium_K_sp_;
Otu00437	0.0071683	12.1274	KJ763909_1_1801_U	Eukaryota;Alveolata;Dinoflagellata;Dinophyceae;Prorocentrales;Prorocentraceae;Prorocentrum;Prorocentrum_sp_;
Otu00455	0.00479409	12.1154	JN832730_1_1677_U	Eukaryota;Alveolata;Ciliophora;Spirotrichea;Strombidiida;Strombidiidae_Q;Strombidiidae_Q_X;Strombidiidae_Q_X_sp_;
Otu00675	0.00671173	12.0957	JQ226527_1_1594_U	Eukaryota;Opisthokonta;Choanoflagellida;Choanoflagellida_X;Choanoflagellida_XX;Choanoflagellida_XX_Clade-3;Choanoflagellida_XX_Clade-3_X;Choanoflagellida_XX_Clade-3_X_sp_;
Otu00201	0.00495389	11.9789	KF130043_1_1759_U	Eukaryota;Alveolata;Dinoflagellata;Syndiniales;Dino-Group-II;Dino-Group-II-Clade-4;Dino-Group-II-Clade-4_X;Dino-Group-II-Clade-4_X_sp_;
Otu00209	0.0120081	11.9721	EU792993_1_918_U	Eukaryota;Alveolata;Dinoflagellata;Syndiniales;Dino-Group-II;Dino-Group-II-Clade-19;Dino-Group-II-Clade-19_X;Dino-Group-II-Clade-19_X_sp_;
Otu00560	0.0105927	11.9609	KF422628_1_1643_U	Eukaryota;Archaeplastida;Chlorophyta;Chloropicophyceae;Chloropicales;Chloropicaceae;Chloroparvula;Chloroparvula_japonica;
Otu00457	0.01162	11.9233	EU793789_1_1508_U	Eukaryota;Alveolata;Dinoflagellata;Syndiniales;Dino-Group-II;Dino-Group-II-Clade-16;Dino-Group-II-Clade-16_X;Dino-Group-II-Clade-16_X_sp_;
Otu00527	0.0158205	11.8659	EF058253_1_1725_U	Eukaryota;Alveolata;Dinoflagellata;Dinophyceae;Suessiales;Borghiellaceae;Borghiella;Borghiella_tenuissima;
Otu00429	0.0070085	11.824	KC488403_1_1691_U	Eukaryota;Alveolata;Dinoflagellata;Dinophyceae;Prorocentrales;Prorocentraceae;Prorocentrum;Prorocentrum_sp_;
Otu00821	0.00248836	11.8219	AF525865_1_1775_U	Eukaryota;Archaeplastida;Chlorophyta;Mamiellophyceae;Mamiellales;Bathycoccaceae;Bathycoccus;Bathycoccus_prasinos;
Otu01759	0.0129897	11.8217	MG972215_1_1745_U	Eukaryota;Stramenopiles;Ochrophyta;Bacillariophyta;Bacillariophyta_X;Polar-centric-Mediophyceae;Chaetoceros;Chaetoceros_brevis_2;
Otu00258	0.0015752	11.8139	KF130275_1_1762_U	Eukaryota;Alveolata;Dinoflagellata;Syndiniales;Dino-Group-III;Dino-Group-III_X;Dino-Group-III_XX;Dino-Group-III_XX_sp_;
Otu00772	0.000890331	11.7907	JX188303_1_1756_U	Eukaryota;Alveolata;Dinoflagellata;Syndiniales;Dino-Group-II;Dino-Group-II-Clade-3;Dino-Group-II-Clade-3_X;Dino-Group-II-Clade-3_X_sp_;
Otu00398	0.04285	11.788	AJ877014_1_1775_U	Eukaryota;Alveolata;Ciliophora;Spirotrichea;Choreotrichida;Strombidinopsidae;Strombidinopsis;Strombidinopsis_acuminata;
Otu00065	0.0170076	11.7017	ADID01001107_1_1709_U	Eukaryota;Amoebozoa;Conosa;Mycetozoa-Dictyostelea;Dictyosteliida;Dictyosteliida_X;Dictyostelium;Dictyostelium_purpureum;
Otu00324	0.00171217	11.6944	KF130299_1_1759_U	Eukaryota;Alveolata;Dinoflagellata;Syndiniales;Dino-Group-II;Dino-Group-II-Clade-8;Dino-Group-II-Clade-8_X;Dino-Group-II-Clade-8_X_sp_;
Otu01124	0.00175783	11.6943	AB854036_1_1729_U	Eukaryota;Archaeplastida;Chlorophyta;Pyramimonadophyceae;Pyramimonadales;Pyramimonadaceae;Pyramimonas;Pyramimonas_sp_;
Otu00084	0.315885	11.6519	EU333053_1_800_U	Eukaryota;Alveolata;Dinoflagellata;Syndiniales;Dino-Group-II;Dino-Group-II-Clade-10-and-11;Dino-Group-II-Clade-10-and-11_X;Dino-Group-II-Clade-10-and-11_X_sp_;
Otu01003	0.00328738	11.5973	EU793924_1_918_U	Eukaryota;Alveolata;Dinoflagellata;Syndiniales;Dino-Group-II;Dino-Group-II-Clade-4;Dino-Group-II-Clade-4_X;Dino-Group-II-Clade-4_X_sp_;
Otu01316	0.0885537	11.531	KF130611_1_1755_U	Eukaryota;Alveolata;Dinoflagellata;Syndiniales;Dino-Group-II;Dino-Group-II-Clade-14;Dino-Group-II-Clade-14_X;Dino-Group-II-Clade-14_X_sp_;
Otu00497	0.0138572	11.5187	AF274051_1_1720_U	Eukaryota;Opisthokonta;Mesomycetozoa;Ichthyosporea;Ichthyosphonida;Ichthyophonidae_Amoebidianae;Amoebidium;Amoebidium_parasiticum;
Otu00322	0.0221213	11.4879	JF791064_1_1777_U	Eukaryota;Hacrobia;Cryptophyta;Cryptophyceae;Goniomonadales;Goniomonadales_X;Goniomonas;Goniomonas_sp_;
Otu00711	0.00123277	11.4803	KJ463441_1_1500_U	Eukaryota;Stramenopiles;Ochrophyta;Bacillariophyta;Bacillariophyta_X;Raphid-pennate;Amphora;Amphora_semperpalorum;
Otu00147	0.029906	11.4436	EU446389_1_1555_U	Eukaryota;Alveolata;Dinoflagellata;Syndiniales;Dino-Group-II;Dino-Group-II-Clade-4;Dino-Group-II-Clade-4_X;Dino-Group-II-Clade-4_X_sp_;
Otu02663	0.0107296	11.4397	EU143480_1_898_U	Eukaryota;Archaeplastida;Prasinodermophyta;Prasinodermophyceae;Prasinodermales;Prasinodermaceae;Prasinodermaceae_X;Prasinodermaceae_X_sp_;
Otu00781	0.0052735	11.3752	EU333034_1_800_U	Eukaryota;Alveolata;Dinoflagellata;Syndiniales;Dino-Group-II;Dino-Group-II-Clade-3;Dino-Group-II-Clade-3_X;Dino-Group-II-Clade-3_X_sp_;
Otu00758	0.0152726	11.3736	KJ763454_1_1804_U	Eukaryota;Alveolata;Dinoflagellata;Syndiniales;Dino-Group-II;Dino-Group-II-Clade-10-and-11;Dino-Group-II-Clade-10-and-11_X;Dino-Group-II-Clade-10-and-11_X_sp_;
Otu00327	0.00152954	11.3646	KJ577871_1_1764_U	Eukaryota;Stramenopiles;Ochrophyta;Ochrophyta_X;Ochrophyta_XX;Ochrophyta_XXX;Pseudosolenia;Pseudosolenia_calcar-avis;
Otu00720	0.00337869	11.3375	KJ763864_1_1799_U	Eukaryota;Alveolata;Dinoflagellata;Syndiniales;Dino-Group-II;Dino-Group-II_X;Dino-Group-II_XX;Dino-Group-II_XX_sp_;
Otu01225	0.0363894	11.3367	KJ763489_1_1801_U	Eukaryota;Alveolata;Dinoflagellata;Syndiniales;Dino-Group-II;Dino-Group-II-Clade-1;Dino-Group-II-Clade-1_X;Dino-Group-II-Clade-1_X_sp_;
Otu00751	0.00178066	11.3086	AB430589_1_1773_U	Eukaryota;Stramenopiles;Ochrophyta;Bacillariophyta;Bacillariophyta_X;Radial-centric-basal-Coscinodiscophyceae;Rhizosolenia;Rhizosolenia_setigera;
Otu01046	0.00296777	11.1625	KJ763439_1_1796_U	Eukaryota;Alveolata;Dinoflagellata;Syndiniales;Dino-Group-II;Dino-Group-II-Clade-1;Dino-Group-II-Clade-1_X;Dino-Group-II-Clade-1_X_sp_;
Otu01026	0.0015752	11.1499	AY425303_1_1754_U	Eukaryota;Archaeplastida;Chlorophyta;Chloropicophyceae;Chloropicales;Chloropicaceae;Chloropicon;Chloropicon_roscoffensis;
Otu01017	0.0105698	11.1366	JN831801_1_1673_U	Eukaryota;Alveolata;Ciliophora;Spirotrichea;Tintinnida;Tintinnidiidae;Tintinnidium;Tintinnidium_sp_;
Otu00681	0.00922291	11.1137	KJ760518_1_1794_U	Eukaryota;Alveolata;Dinoflagellata;Syndiniales;Dino-Group-II;Dino-Group-II-Clade-44;Dino-Group-II-Clade-44_X;Dino-Group-II-Clade-44_X_sp_;
Otu00633	0.0199069	11.0798	KJ761297_1_1788_U	Eukaryota;Alveolata;Dinoflagellata;Syndiniales;Dino-Group-I;Dino-Group-I-Clade-3;Dino-Group-I-Clade-3_X;Dino-Group-I-Clade-3_X_sp_;
Otu01626	0.0124418	11.0793	EU333101_1_800_U	Eukaryota;Alveolata;Ciliophora;Spirotrichea;Tintinnida;Eutintinnidae;Eutintinnidae_X;Eutintinnidae_X_sp_;
Otu00508	0.0147932	11.0553	KF130143_1_1760_U	Eukaryota;Alveolata;Dinoflagellata;Syndiniales;Dino-Group-II;Dino-Group-II-Clade-10-and-11;Dino-Group-II-Clade-10-and-11_X;Dino-Group-II-Clade-10-and-11_X_sp_;
Otu00230	0.0134006	11.0549	AY208893_1_1819_U	Eukaryota;Alveolata;Dinoflagellata;Syndiniales;Dino-Group-II;Dino-Group-II-Clade-4;Amoebophrya;Amoebophrya_ceratii;
Otu01562	0.000799015	11.036	JQ781941_1_1807_U	Eukaryota;Stramenopiles;Opalozoa;MAST-3;MAST-3E;MAST-3E_X;MAST-3E_XX;MAST-3E_XX_sp_;
Otu02585	0.0288787	11.0331	KY290314_1_1642_U	Eukaryota;Alveolata;Ciliophora;Spirotrichea;Choreotrichida;Strobilidiidae_I;Pelagostrobilidium;Pelagostrobilidium_sp_;
Otu01141	0.00287645	11.025	KJ763427_1_1799_U	Eukaryota;Alveolata;Dinoflagellata;Syndiniales;Dino-Group-II;Dino-Group-II-Clade-10-and-11;Dino-Group-II-Clade-10-and-11_X;Dino-Group-II-Clade-10-and-11_X_sp_;
Otu00661	0.0171674	11.0213	AY208893_1_1819_U	Eukaryota;Alveolata;Dinoflagellata;Syndiniales;Dino-Group-II;Dino-Group-II-Clade-4;Amoebophrya;Amoebophrya_ceratii;
Otu01131	0.00182632	10.9966	JQ956275_1_1697_U	Eukaryota;Alveolata;Dinoflagellata;Syndiniales;Dino-Group-II;Dino-Group-II-Clade-1;Dino-Group-II-Clade-1_X;Dino-Group-II-Clade-1_X_sp_;
Otu01370	0.0330107	10.9922	JN831815_1_1666_U	Eukaryota;Alveolata;Ciliophora;Spirotrichea;Tintinnida;TIN_01;Tintinnopsis_01;Tintinnopsis_major;
Otu01727	0.000570725	10.9649	KJ763379_1_1799_U	Eukaryota;Alveolata;Dinoflagellata;Syndiniales;Dino-Group-II;Dino-Group-II-Clade-22;Dino-Group-II-Clade-22_X;Dino-Group-II-Clade-22_X_sp_;
Otu00484	0.00851522	10.9421	AY664937_1_1755_U	Eukaryota;Alveolata;Dinoflagellata;Dinophyceae;Dinophyceae_X;Dinophyceae_XX;Dinophyceae_XXX;Dinophyceae_XXX_sp_;
Otu01057	0.00146106	10.8936	KJ763471_1_1796_U	Eukaryota;Alveolata;Dinoflagellata;Syndiniales;Dino-Group-II;Dino-Group-II-Clade-1;Dino-Group-II-Clade-1_X;Dino-Group-II-Clade-1_X_sp_;
Otu00589	0.00470277	10.881	KJ758831_1_1790_U	Eukaryota;Opisthokonta;Fungi;Chytridiomycota;Chytridiomycotina;Chytridiomycetes;Spizellomycetales-and-Rhizophlyctidales;Spizellomycetales-and-Rhizophlyctidales_sp_;
Otu01074	0.00114145	10.8696	EU793924_1_918_U	Eukaryota;Alveolata;Dinoflagellata;Syndiniales;Dino-Group-II;Dino-Group-II-Clade-4;Dino-Group-II-Clade-4_X;Dino-Group-II-Clade-4_X_sp_;
Otu00935	0.00303626	10.8588	KJ761195_1_1797_U	Eukaryota;Alveolata;Dinoflagellata;Syndiniales;Dino-Group-II;Dino-Group-II_X;Dino-Group-II_XX;Dino-Group-II_XX_sp_;
Otu00835	0.00579857	10.8248	KC488336_1_1682_U	Eukaryota;Hacrobia;Picozoa;Picozoa_X;Picozoa_XX;Picozoa_XXX;Picozoa_XXXX;Picozoa_XXXX_sp_;
Otu00608	0.000981647	10.8129	HQ912656_1_1656_U	Eukaryota;Stramenopiles;Ochrophyta;Bacillariophyta;Bacillariophyta_X;Araphid-pennate;Plagiogramma;Plagiogramma_staurophorum;
Otu00827	0.00719113	10.81	KJ762832_1_1801_U	Eukaryota;Alveolata;Dinoflagellata;Dinophyceae;Dinophyceae_X;Dinophyceae_XX;Dinophyceae_XXX;Dinophyceae_XXX_sp_;
Otu00829	0.00294494	10.7848	AY129040_1_1796_U	Eukaryota;Alveolata;Dinoflagellata;Syndiniales;Dino-Group-II;Dino-Group-II-Clade-2;Dino-Group-II-Clade-2_X;Dino-Group-II-Clade-2_X_sp_;
Otu00544	0.00353849	10.7784	HQ393981_1_807_U	Eukaryota;Stramenopiles;Sagenista;Labyrinthulomycetes;Thraustochytrida;Thraustochytriaceae;Thraustochytriaceae_LAB17;Thraustochytriaceae_LAB17_sp_;
Otu00174	0.0319606	10.7699	KJ762603_1_1796_U	Eukaryota;Alveolata;Dinoflagellata;Syndiniales;Dino-Group-II;Dino-Group-II-Clade-3;Dino-Group-II-Clade-3_X;Dino-Group-II-Clade-3_X_sp_;
Otu00706	0.00344718	10.7603	JN832757_1_943_U	Eukaryota;Alveolata;Dinoflagellata;Dinophyceae;Dinophyceae_X;Dinophyceae_XX;Dinophyceae_XXX;Dinophyceae_XXX_sp_;
Otu00094	0.323144	10.7405	AY143571_1_1681_U	Eukaryota;Alveolata;Ciliophora;Spirotrichea;Tintinnida;Dictyocystidae;Codonellopsis;Codonellopsis_americana;
Otu00585	0.00337869	10.7373	KF130179_1_1757_U	Eukaryota;Alveolata;Dinoflagellata;Syndiniales;Dino-Group-II;Dino-Group-II-Clade-3;Dino-Group-II-Clade-3_X;Dino-Group-II-Clade-3_X_sp_;
Otu00525	0.00470277	10.7053	EU143417_1_904_U	Eukaryota;Archaeplastida;Chlorophyta;Pyramimonadophyceae;Pyramimonadales;Halosphaeraceae;Halosphaera;Halosphaera_sp_;
Otu00765	0.000844673	10.6124	AY129050_1_1798_U	Eukaryota;Alveolata;Dinoflagellata;Syndiniales;Dino-Group-II;Dino-Group-II-Clade-57;Dino-Group-II-Clade-57_X;Dino-Group-II-Clade-57_X_sp_;
Otu01038	0.00120994	10.6	KJ763927_1_1794_U	Eukaryota;Alveolata;Dinoflagellata;Syndiniales;Dino-Group-II;Dino-Group-II-Clade-1;Dino-Group-II-Clade-1_X;Dino-Group-II-Clade-1_X_sp_;
Otu00855	0.000570725	10.5932	AJ564770_1_1795_U	Eukaryota;Hacrobia;Telonemia;Telonemia_X;Telonemia_XX;Telonemia-Group-1;Telonemia-Group-1_X;Telonemia-Group-1_X_sp_;
Otu00582	0.00499955	10.5804	FN690341_1_830_U	Eukaryota;Alveolata;Dinoflagellata;Syndiniales;Dino-Group-II;Dino-Group-II-Clade-28;Dino-Group-II-Clade-28_X;Dino-Group-II-Clade-28_X_sp_;
Otu00956	0.00785317	10.5789	DQ779992_248_2051_U	Eukaryota;Alveolata;Dinoflagellata;Dinophyceae;Gymnodiniales;Gymnodiniaceae;Gymnodinium;Gymnodinium_impudicum;
Otu01395	0.000753357	10.5728	KJ763571_1_1802_U	Eukaryota;Alveolata;Dinoflagellata;Syndiniales;Dino-Group-II;Dino-Group-II-Clade-5;Dino-Group-II-Clade-5_X;Dino-Group-II-Clade-5_X_sp_;
Otu00921	0.00194046	10.5474	AJ415514_1_1749_U	Eukaryota;Alveolata;Dinoflagellata;Dinophyceae;Peridiniales;Heterocapsaceae;Heterocapsa;Heterocapsa_triquetra;
Otu00056	2.19017	10.5306	AB252762_1_1701_U	Eukaryota;Alveolata;Dinoflagellata;Syndiniales;Dino-Group-I;Dino-Group-I-Clade-1;Dino-Group-I-Clade-1_X;Dino-Group-I-Clade-1_X_sp_;
Otu00473	0.0306365	10.5273	AAAA02038172_160_1957_U	Eukaryota;Opisthokonta;Fungi;Basidiomycota;Ustilaginomycotina;Ustilaginomycetes;Ustilaginomycetes_X;Ustilaginomycetes_X_sp_;
Otu01055	0.00397225	10.5271	KJ762974_1_1795_U	Eukaryota;Hacrobia;Telonemia;Telonemia_X;Telonemia_XX;Telonemia-Group-2;Telonemia-Group-2_X;Telonemia-Group-2_X_sp_;
Otu00337	0.0239248	10.5119	KJ759695_1_1780_U	Eukaryota;Alveolata;Dinoflagellata;Syndiniales;Dino-Group-I;Dino-Group-I-Clade-5;Dino-Group-I-Clade-5_X;Dino-Group-I-Clade-5_X_sp_;
Otu02595	0.00353849	10.4958	KJ763464_1_1800_U	Eukaryota;Alveolata;Dinoflagellata;Syndiniales;Dino-Group-II;Dino-Group-II_X;Dino-Group-II_XX;Dino-Group-II_XX_sp_;
Otu01537	0.00577574	10.4847	KC771186_1_1774_U	Eukaryota;Alveolata;Ciliophora;Spirotrichea;Strombidiida;Strombidiidae;Parallelostrombidium;Parallelostrombidium_conicum;
Otu00142	0.0257055	10.4671	KJ763017_1_1795_U	Eukaryota;Alveolata;Dinoflagellata;Dinophyceae;Dinophyceae_X;Dinophyceae_XX;Dinophyceae_XXX;Dinophyceae_XXX_sp_;
Otu00513	0.00239704	10.4502	KF129849_1_1758_U	Eukaryota;Alveolata;Dinoflagellata;Syndiniales;Dino-Group-II;Dino-Group-II-Clade-6;Dino-Group-II-Clade-6_X;Dino-Group-II-Clade-6_X_sp_;
Otu00954	0.00255685	10.4186	AY129052_1_1800_U	Eukaryota;Alveolata;Dinoflagellata;Syndiniales;Dino-Group-II;Dino-Group-II_X;Dino-Group-II-Clade-52_X;Dino-Group-II-Clade-52_X_sp_;
Otu00341	0.0671173	10.3971	MF527277_1_1618_U	Eukaryota;Alveolata;Ciliophora;Spirotrichea;Choreotrichida;Leegaardiellidae_B;Leegaardiella;Leegaardiella_sp_;
Otu00944	0.00091316	10.3896	AM490986_1_1722_U	Eukaryota;Hacrobia;Haptophyta;Prymnesiophyceae;Syracosphaerales;Syracosphaeraceae;Coronosphaera;Coronosphaera_mediterranea;
Otu00576	0.0010273	10.3846	FN562449_1_1771_U	Eukaryota;Archaeplastida;Chlorophyta;Mamiellophyceae;Dolichomastigales;Dolichomastigaceae;Dolichomastix;Dolichomastix_tenuilepis;
Otu00654	0.000662041	10.3827	KC488357_1_1681_U	Eukaryota;Opisthokonta;Choanoflagellida;Choanoflagellatea;Acanthoecida;Stephanoecidae_Group_D;Stephanoecidae_Group_D_X;Stephanoecidae_Group_D_X_sp_;
Otu00152	0.00342435	10.3782	EU333056_1_800_U	Eukaryota;Alveolata;Dinoflagellata;Dinophyceae;Dinophyceae_X;Dinophyceae_XX;Dinophyceae_XXX;Dinophyceae_XXX_sp_;
Otu00607	0.00187198	10.3765	KC309522_1_1641_U	Eukaryota;Stramenopiles;Ochrophyta;Bacillariophyta;Bacillariophyta_X;Radial-centric-basal-Coscinodiscophyceae;Actinocyclus;Actinocyclus_sp_;
Otu00389	0.00353849	10.3511	AB183602_1_1749_U	Eukaryota;Archaeplastida;Prasinodermophyta;Prasinodermophyceae;Prasinodermales;Prasinodermaceae;Prasinoderma;Prasinoderma_coloniale;
Otu01220	0.0142225	10.3366	AB058371_1_1748_U	Eukaryota;Archaeplastida;Chlorophyta;Chlorophyceae;Chlamydomonadales;Chlamydomonadales_X;Chlamydomonas;Chlamydomonas_sp_;
Otu00019	3.77708	10.3292	U37365_1_1796_U	Eukaryota;Alveolata;Dinoflagellata;Dinophyceae;Suessiales;Suessiaceae;Pelagodinium;Pelagodinium_beii;
Otu01166	0.0128756	10.3231	KC911786_1_817_U	Eukaryota;Alveolata;Ciliophora;Spirotrichea;Choreotrichida;Strobilidiidae_G;Strobilidiidae_G_X;Strobilidiidae_G_X_sp_;
Otu00514	0.000776186	10.3214	KF130061_1_1763_U	Eukaryota;Hacrobia;Centroheliozoa;Centroheliozoa_X;Pterocystida;Pterocystida_X;Pterocystida_XX;Pterocystida_XX_sp_;
Otu00755	0.0131495	10.3196	X68484_4_1753_U	Eukaryota;Archaeplastida;Chlorophyta;Chlorodendrophyceae;Chlorodendrales;Chlorodendraceae;Scherffelia;Scherffelia_dubia;
Otu00843	0.000821844	10.2857	AY426848_1_1787_U	Eukaryota;Opisthokonta;Choanoflagellida;Choanoflagellatea;Acanthoecida;Stephanoecidae_Group_D;Stephanoecidae_Group_D_X;Stephanoecidae_Group_D_X_sp_;
Otu00404	0.00226007	10.2628	EU792993_1_918_U	Eukaryota;Alveolata;Dinoflagellata;Syndiniales;Dino-Group-II;Dino-Group-II-Clade-19;Dino-Group-II-Clade-19_X;Dino-Group-II-Clade-19_X_sp_;
Otu01006	0.00146106	10.24	MG202010_1497_3290_U	Eukaryota;Eukaryota_X;Ancoracystida;Ancoracystida_X;Ancoracystida_XX;Ancoracystida_XXX;Ancoracysta;Ancoracysta_twista;
Otu00883	0.00100448	10.1895	EU446389_1_1555_U	Eukaryota;Alveolata;Dinoflagellata;Syndiniales;Dino-Group-II;Dino-Group-II-Clade-4;Dino-Group-II-Clade-4_X;Dino-Group-II-Clade-4_X_sp_;
Otu01443	0.00130125	10.185	EU162619_1_1753_U	Eukaryota;Alveolata;Dinoflagellata;Dinophyceae;Dinophyceae_X;Dinophyceae_XX;Dinophyceae_XXX;Dinophyceae_XXX_sp_;
Otu00880	0.00105013	10.1731	EF173006_1_1680_U	Eukaryota;Alveolata;Dinoflagellata;Syndiniales;Dino-Group-II;Dino-Group-II-Clade-5;Dino-Group-II-Clade-5_X;Dino-Group-II-Clade-5_X_sp_;
Otu01349	0.00136974	10.1695	KF129738_1_1746_U	Eukaryota;Stramenopiles;Opalozoa;MAST-3;MAST-3J;MAST-3J_X;MAST-3J_XX;MAST-3J_XX_sp_;
Otu01314	0.000707699	10.1158	AY664964_1_1755_U	Eukaryota;Alveolata;Dinoflagellata;Dinophyceae;Dinophyceae_X;Dinophyceae_XX;Dinophyceae_XXX;Dinophyceae_XXX_sp_;
Otu01247	0.0133321	10.0839	KC488367_1_1653_U	Eukaryota;Alveolata;Ciliophora;Spirotrichea;Choreotrichida;Strobilidiidae_I;Strobilidiidae_I_X;Strobilidiidae_I_X_sp_;
Otu01045	0.000639212	10.0513	EU793785_1_1664_U	Eukaryota;Alveolata;Dinoflagellata;Syndiniales;Dino-Group-II;Dino-Group-II-Clade-5;Dino-Group-II-Clade-5_X;Dino-Group-II-Clade-5_X_sp_;
Otu01125	0.000730528	10.0392	EU143420_1_904_U	Eukaryota;Archaeplastida;Chlorophyta;Pyramimonadophyceae;Pyramimonadales;Halosphaeraceae;Halosphaera;Halosphaera_sp_;
Otu00441	0.00509087	10.028	JN832792_1_958_U	Eukaryota;Alveolata;Dinoflagellata;Syndiniales;Dino-Group-II;Dino-Group-II-Clade-8;Dino-Group-II-Clade-8_X;Dino-Group-II-Clade-8_X_sp_;
Otu01145	0.0262533	10.0232	HQ219364_1_1769_U	Eukaryota;Stramenopiles;Opalozoa;MAST-12;MAST-12A;MAST-12A_X;MAST-12A_XX;MAST-12A_XX_sp_;
Otu01156	0.000753357	9.99083	AF370028_1_1767_U	Eukaryota;Alveolata;Ciliophora;Spirotrichea;Hypotrichia;Oxytrichidae;Oxytricha;Oxytricha_saltans;
Otu00960	0.000616383	9.9863	JQ781999_1_1777_U	Eukaryota;Stramenopiles;Opalozoa;MAST-3;MAST-3I;MAST-3I_X;MAST-3I_XX;MAST-3I_XX_sp_;
Otu01115	0.000593554	9.94118	FN690161_1_1685_U	Eukaryota;Alveolata;Dinoflagellata;Dinophyceae;Suessiales;Suessiaceae;Suessiaceae_X;Suessiaceae_X_sp_;
Otu00554	0.000593554	9.94118	KJ759731_1_1795_U	Eukaryota;Alveolata;Dinoflagellata;Syndiniales;Dino-Group-II;Dino-Group-II-Clade-3;Dino-Group-II-Clade-3_X;Dino-Group-II-Clade-3_X_sp_;
Otu02362	0.000296777	9.94118	AY665082_1_1749_U	Eukaryota;Hacrobia;Katablepharidophyta;Katablepharidaceae;Katablepharidales;Katablepharidales_X;Katablepharidales_XX;Katablepharidales_XX_sp_;
Otu00669	0.00513652	9.93231	KJ757134_1_1800_U	Eukaryota;Alveolata;Dinoflagellata;Syndiniales;Dino-Group-II;Dino-Group-II-Clade-9;Dino-Group-II-Clade-9_X;Dino-Group-II-Clade-9_X_sp_;
Otu00653	0.00120994	9.9258	DQ388461_1_1689_U	Eukaryota;Alveolata;Dinoflagellata;Noctilucophyceae;Noctilucales;Noctilucaceae;Noctiluca;Noctiluca_scintillans;
Otu01148	0.00196329	9.91421	EU793924_1_918_U	Eukaryota;Alveolata;Dinoflagellata;Syndiniales;Dino-Group-II;Dino-Group-II-Clade-4;Dino-Group-II-Clade-4_X;Dino-Group-II-Clade-4_X_sp_;
Otu00754	0.000662041	9.89412	EU780614_1_1487_U	Eukaryota;Alveolata;Dinoflagellata;Syndiniales;Dino-Group-II;Dino-Group-II-Clade-16;Dino-Group-II-Clade-16_X;Dino-Group-II-Clade-16_X_sp_;
Otu01094	0.000662041	9.89412	EU793933_1_1559_U	Eukaryota;Alveolata;Dinoflagellata;Syndiniales;Dino-Group-II;Dino-Group-II-Clade-44;Dino-Group-II-Clade-44_X;Dino-Group-II-Clade-44_X_sp_;
Otu00838	0.00155237	9.88034	KJ762960_1_1788_U	Eukaryota;Stramenopiles;Sagenista;MAST-4;MAST-4A;MAST-4A_X;MAST-4A_XX;MAST-4A_XX_sp_;
Otu00674	0.00531916	9.80831	KF130110_1_1758_U	Eukaryota;Alveolata;Dinoflagellata;Syndiniales;Dino-Group-II;Dino-Group-II-Clade-12;Dino-Group-II-Clade-12_X;Dino-Group-II-Clade-12_X_sp_;
Otu01783	0.0120537	9.79909	MG972209_1_1724_U	Eukaryota;Stramenopiles;Ochrophyta;Bacillariophyta;Bacillariophyta_X;Polar-centric-Mediophyceae;Bacteriastrum;Bacteriastrum_parallelum;
Otu00995	0.0066889	9.79676	KC488433_1_1690_U	Eukaryota;Alveolata;Dinoflagellata;Dinophyceae;Dinophyceae_X;Dinophyceae_XX;Dinophyceae_XXX;Dinophyceae_XXX_sp_;
Otu00800	0.00210027	9.75115	EU333034_1_800_U	Eukaryota;Alveolata;Dinoflagellata;Syndiniales;Dino-Group-II;Dino-Group-II-Clade-3;Dino-Group-II-Clade-3_X;Dino-Group-II-Clade-3_X_sp_;
Otu00806	0.0117798	9.72518	KJ757673_1_1791_U	Eukaryota;Alveolata;Dinoflagellata;Syndiniales;Dino-Group-I;Dino-Group-I-Clade-3;Dino-Group-I-Clade-3_X;Dino-Group-I-Clade-3_X_sp_;
Otu00860	0.00111862	9.72065	JF826394_1_1605_U	Eukaryota;Alveolata;Dinoflagellata;Dinophyceae;Dinophyceae_X;Dinophyceae_XX;Dinophyceae_XXX;Dinophyceae_XXX_sp_;
Otu00382	0.0227833	9.72015	KJ759341_1_1721_U	Eukaryota;Alveolata;Ciliophora;Phyllopharyngea;Cyrtophoria_1;PHYLL_4;PHYLL_4_X;PHYLL_4_X_sp_;
Otu00734	0.00995344	9.69779	KJ760651_1_1788_U	Eukaryota;Alveolata;Dinoflagellata;Syndiniales;Dino-Group-I;Dino-Group-I-Clade-1;Dino-Group-I-Clade-1_X;Dino-Group-I-Clade-1_X_sp_;
Otu00810	0.000981647	9.68063	KJ759570_1_1784_U	Eukaryota;Alveolata;Dinoflagellata;Syndiniales;Dino-Group-I;Dino-Group-I-Clade-5;Dino-Group-I-Clade-5_X;Dino-Group-I-Clade-5_X_sp_;
Otu00313	0.00136974	9.67742	EF527109_1_1755_U	Eukaryota;Alveolata;Dinoflagellata;Dinophyceae;Gonyaulacales;Ceratiaceae;Ceratium;Ceratium_sp_;
Otu00480	0.0240161	9.64969	JX841429_1_590_U	Eukaryota;Alveolata;Ciliophora;CONThreeP;CONThreeP_X;CONThreeP_XX;Askenasia;Askenasia_sp_;
Otu00538	0.0245868	9.64237	AB073118_1_1749_U	Eukaryota;Alveolata;Dinoflagellata;Dinophyceae;Dinophysiales;Dinophysiaceae;Dinophysis;Dinophysis_fortii;
Otu01146	0.00342435	9.62361	KJ762528_1_1800_U	Eukaryota;Alveolata;Dinoflagellata;Dinophyceae;Dinophyceae_X;Dinophyceae_XX;Dinophyceae_XXX;Dinophyceae_XXX_sp_;
Otu00493	0.0190166	9.58662	AB058309_1_1749_U	Eukaryota;Archaeplastida;Chlorophyta;Trebouxiophyceae;Chlorellales;Chlorellales_X;Picochlorum;Picochlorum_sp_;
Otu00662	0.000410922	9.52941	KF129714_1_1748_U	Eukaryota;Hacrobia;Telonemia;Telonemia_X;Telonemia_XX;Telonemia-Group-2;Telonemia-Group-2_X;Telonemia-Group-2_X_sp_;
Otu00645	0.000753357	9.46957	KJ757849_1_1798_U	Eukaryota;Stramenopiles;Ochrophyta;Bolidophyceae;Parmales;Parmales_env_3;Parmales_env_3_X;Parmales_env_3_X_sp_;
Otu00522	0.000662041	9.44944	AY129047_1_1800_U	Eukaryota;Alveolata;Dinoflagellata;Syndiniales;Dino-Group-II;Dino-Group-II-Clade-10-and-11;Dino-Group-II-Clade-10-and-11_X;Dino-Group-II-Clade-10-and-11_X_sp_;
Otu01792	0.00251119	9.43838	KF130522_1_1757_U	Eukaryota;Alveolata;Dinoflagellata;Syndiniales;Dino-Group-II;Dino-Group-II-Clade-2;Dino-Group-II-Clade-2_X;Dino-Group-II-Clade-2_X_sp_;
Otu01217	0.00376678	9.43674	KJ762264_1_1801_U	Eukaryota;Alveolata;Dinoflagellata;Syndiniales;Dino-Group-II;Dino-Group-II-Clade-7;Dino-Group-II-Clade-7_X;Dino-Group-II-Clade-7_X_sp_;
Otu00453	0.0189024	9.43187	AB058347_1_1756_U	Eukaryota;Hacrobia;Haptophyta;Prymnesiophyceae;Coccolithales;Hymenomonadaceae;Ochrosphaera;Ochrosphaera_sp_;
Otu00996	0.00118711	9.38889	EU143425_1_890_U	Eukaryota;Archaeplastida;Chlorophyta;Mamiellophyceae;Mamiellales;Mamiellaceae;Mamiella;Mamiella_gilva;
Otu01926	0.000479409	9.38298	JX413558_1_1637_U	Eukaryota;Stramenopiles;Stramenopiles_X;Stramenopiles_X-Group-7;Stramenopiles_X-Group-7_X;Stramenopiles_X-Group-7_XX;Stramenopiles_X-Group-7_XXX;Stramenopiles_X-Group-7_XXX_sp_;
Otu00362	0.00262533	9.37279	EU793924_1_918_U	Eukaryota;Alveolata;Dinoflagellata;Syndiniales;Dino-Group-II;Dino-Group-II-Clade-4;Dino-Group-II-Clade-4_X;Dino-Group-II-Clade-4_X_sp_;
Otu00595	0.00388093	9.35275	AB126653_1_1781_U	Eukaryota;Opisthokonta;Fungi;Basidiomycota;Pucciniomycotina;Cystobasidiomycetes;Rhodotorula;Rhodotorula_slooffiae;
Otu00184	0.00493106	9.3499	EU333053_1_800_U	Eukaryota;Alveolata;Dinoflagellata;Syndiniales;Dino-Group-II;Dino-Group-II-Clade-10-and-11;Dino-Group-II-Clade-10-and-11_X;Dino-Group-II-Clade-10-and-11_X_sp_;
Otu00730	0.0213223	9.3396	EU446389_1_1555_U	Eukaryota;Alveolata;Dinoflagellata;Syndiniales;Dino-Group-II;Dino-Group-II-Clade-4;Dino-Group-II-Clade-4_X;Dino-Group-II-Clade-4_X_sp_;
Otu02162	0.000707699	9.3301	KF130203_1_1759_U	Eukaryota;Alveolata;Dinoflagellata;Syndiniales;Dino-Group-II;Dino-Group-II-Clade-5;Dino-Group-II-Clade-5_X;Dino-Group-II-Clade-5_X_sp_;
Otu01005	0.000570725	9.32836	KF130231_1_1758_U	Eukaryota;Alveolata;Dinoflagellata;Dinophyceae;Dinophyceae_X;Dinophyceae_XX;Dinophyceae_XXX;Dinophyceae_XXX_sp_;
Otu01073	0.000730528	9.30909	EU143405_1_895_U	Eukaryota;Archaeplastida;Chlorophyta;Mamiellophyceae;Dolichomastigales;Dolichomastigaceae;Dolichomastix;Dolichomastix_tenuilepis;
Otu01024	0.00100448	9.30769	EF172809_1_1601_U	Eukaryota;Alveolata;Dinoflagellata;Dinophyceae;Dinophyceae_X;Dinophyceae_XX;Dinophyceae_XXX;Dinophyceae_XXX_sp_;
Otu01375	0.000753357	9.30769	JQ223245_1_1625_U	Eukaryota;Opisthokonta;Choanoflagellida;Choanoflagellida_X;Choanoflagellida_XX;Choanoflagellida_XX_Clade-3;Choanoflagellida_XX_Clade-3_X;Choanoflagellida_XX_Clade-3_X_sp_;
Otu01187	0.00180349	9.30104	KJ762603_1_1796_U	Eukaryota;Alveolata;Dinoflagellata;Syndiniales;Dino-Group-II;Dino-Group-II-Clade-3;Dino-Group-II-Clade-3_X;Dino-Group-II-Clade-3_X_sp_;
Otu00624	0.00109579	9.29032	EU446388_1_1541_U	Eukaryota;Opisthokonta;Choanoflagellida;Choanoflagellatea;Acanthoecida;Acanthoecidae_Group_G;Acanthoecidae_Group_G_X;Acanthoecidae_Group_G_X_sp_;
Otu00691	0.00162086	9.28361	HQ219364_1_1769_U	Eukaryota;Stramenopiles;Opalozoa;MAST-12;MAST-12A;MAST-12A_X;MAST-12A_XX;MAST-12A_XX_sp_;
Otu00647	0.00214593	9.28151	FJ870070_1_1726_U	Eukaryota;Alveolata;Ciliophora;Phyllopharyngea;Cyrtophoria_1;Pithitidae;Pithites;Pithites_vorax;
Otu00805	0.000433751	9.25641	HQ393985_1_819_U	Eukaryota;Alveolata;Dinoflagellata;Dinophyceae;Dinophyceae_X;Dinophyceae_XX;Dinophyceae_XXX;Dinophyceae_XXX_sp_;
Otu00724	0.00634646	9.23345	FJ858217_1_1763_U	Eukaryota;Alveolata;Ciliophora;Prostomatea_1;Prostomatea_1_X;Colepidae;Tiarina;Tiarina_fusa;
Otu00485	0.00123277	9.22785	KJ763157_1_1797_U	Eukaryota;Alveolata;Dinoflagellata;Dinophyceae;Dinophyceae_X;Dinophyceae_XX;Dinophyceae_XXX;Dinophyceae_XXX_sp_;
Otu01277	0.000616383	9.22785	KF130206_1_1737_U	Eukaryota;Stramenopiles;Opalozoa;MAST-3;MAST-3I;MAST-3I_X;MAST-3I_XX;MAST-3I_XX_sp_;
Otu00688	0.000799015	9.21053	DQ388462_1_1709_U	Eukaryota;Alveolata;Dinoflagellata;Dinophyceae;Gonyaulacales;Ceratiaceae;Tripos;Tripos_longipes;
Otu01090	0.00105013	9.2	EU446389_1_1555_U	Eukaryota;Alveolata;Dinoflagellata;Syndiniales;Dino-Group-II;Dino-Group-II-Clade-4;Dino-Group-II-Clade-4_X;Dino-Group-II-Clade-4_X_sp_;
Otu01421	0.00118711	9.19728	KF129871_1_1747_U	Eukaryota;Opisthokonta;Choanoflagellida;Choanoflagellatea;Acanthoecida;Stephanoecidae_Group_H;Stephanoecidae_Group_H_X;Stephanoecidae_Group_H_X_sp_;
Otu00655	0.00230573	9.14888	KF130233_1_1761_U	Eukaryota;Alveolata;Dinoflagellata;Syndiniales;Dino-Group-II;Dino-Group-II-Clade-4;Dino-Group-II-Clade-4_X;Dino-Group-II-Clade-4_X_sp_;
Otu01367	0.00139257	9.14251	EF526791_1_1342_U	Eukaryota;Alveolata;Dinoflagellata;Dinophyceae;Dinophyceae_X;Dinophyceae_XX;Dinophyceae_XXX;Dinophyceae_XXX_sp_;
Otu00530	0.0465712	9.11141	EF172830_1_1667_U	Eukaryota;Alveolata;Dinoflagellata;Syndiniales;Dino-Group-I;Dino-Group-I-Clade-3;Ichthyodinium;Ichthyodinium_sp_;
Otu00735	0.00045658	9.09091	JN832769_1_927_U	Eukaryota;Alveolata;Dinoflagellata;Syndiniales;Dino-Group-II;Dino-Group-II-Clade-14;Dino-Group-II-Clade-14_X;Dino-Group-II-Clade-14_X_sp_;
Otu00692	0.00851522	9.02205	KF129878_1_1745_U	Eukaryota;Alveolata;Dinoflagellata;Syndiniales;Dino-Group-I;Dino-Group-I-Clade-5;Dino-Group-I-Clade-5_X;Dino-Group-I-Clade-5_X_sp_;
Otu01265	0.000890331	9	EU780605_1_1695_U	Eukaryota;Alveolata;Dinoflagellata;Syndiniales;Dino-Group-II;Dino-Group-II-Clade-1;Dino-Group-II-Clade-1_X;Dino-Group-II-Clade-1_X_sp_;
Otu01728	0.000753357	9	MG972202_1_1652_U	Eukaryota;Stramenopiles;Ochrophyta;Bacillariophyta;Bacillariophyta_X;Polar-centric-Mediophyceae;Bacteriastrum;Bacteriastrum_elegans;
Otu00911	0.000547896	9	AY078092_1_1779_U	Eukaryota;Alveolata;Chrompodellids;Colpodellidea;Colpodellida;Colpodellaceae;Voromonas;Voromonas_pontica;
Otu01610	0.0211168	8.98266	KJ762603_1_1796_U	Eukaryota;Alveolata;Dinoflagellata;Syndiniales;Dino-Group-II;Dino-Group-II-Clade-3;Dino-Group-II-Clade-3_X;Dino-Group-II-Clade-3_X_sp_;
Otu01239	0.00168935	8.97705	KJ763630_1_1795_U	Eukaryota;Alveolata;Dinoflagellata;Syndiniales;Dino-Group-II;Dino-Group-II-Clade-17;Dino-Group-II-Clade-17_X;Dino-Group-II-Clade-17_X_sp_;
Otu01139	0.00285362	8.96443	KJ763339_1_1775_U	Eukaryota;Alveolata;Ciliophora;Spirotrichea;Strombidiida;Tontoniidae_B;Pseudotontonia;Pseudotontonia_sp_;
Otu01731	0.0323487	8.92986	KC894152_1_1721_U	Eukaryota;Stramenopiles;Ochrophyta;Bacillariophyta;Bacillariophyta_X;Raphid-pennate;Tenuicylindrus;Tenuicylindrus_belgicus;
Otu00723	0.0021231	8.9257	EU330214_1_848_U	Eukaryota;Archaeplastida;Chlorophyta;Mamiellophyceae;Dolichomastigales;Dolichomastigaceae;Dolichomastix;Dolichomastix_tenuilepis;
Otu00845	0.000639212	8.90909	HQ393985_1_819_U	Eukaryota;Alveolata;Dinoflagellata;Dinophyceae;Dinophyceae_X;Dinophyceae_XX;Dinophyceae_XXX;Dinophyceae_XXX_sp_;
Otu01001	0.00130125	8.90137	KJ763042_1_1789_U	Eukaryota;Archaeplastida;Chlorophyta;Mamiellophyceae;Dolichomastigales;Dolichomastigaceae;Dolichomastigaceae-A;Dolichomastigaceae-A_sp_;
Otu02507	0.00301343	8.8898	HQ394065_1_818_U	Eukaryota;Alveolata;Ciliophora;Spirotrichea;Tintinnida;Tintinnida_X;Tintinnida_XX;Tintinnida_XX_sp_;
Otu00371	0.0389919	8.88105	AB701508_1_1679_U	Eukaryota;Archaeplastida;Chlorophyta;Chlorophyceae;Chlamydomonadales;Chlamydomonadales_X;Chlamydomonas;Chlamydomonas_sp_;
Otu02733	0.023628	8.86974	KF130461_1_1721_U	Eukaryota;Alveolata;Ciliophora;Spirotrichea;Tintinnida;TIN_02;Climacocylis;Climacocylis_sp_;
Otu00983	0.0022829	8.84956	EU333080_1_800_U	Eukaryota;Alveolata;Dinoflagellata;Dinophyceae;Dinophyceae_X;Dinophyceae_XX;Dinophyceae_XXX;Dinophyceae_XXX_sp_;
Otu00354	0.00433751	8.80059	EU333053_1_800_U	Eukaryota;Alveolata;Dinoflagellata;Syndiniales;Dino-Group-II;Dino-Group-II-Clade-10-and-11;Dino-Group-II-Clade-10-and-11_X;Dino-Group-II-Clade-10-and-11_X_sp_;
Otu00408	0.00100448	8.8	EF527109_1_1755_U	Eukaryota;Alveolata;Dinoflagellata;Dinophyceae;Gonyaulacales;Ceratiaceae;Ceratium;Ceratium_sp_;
Otu00160	0.0140398	8.73358	EU446389_1_1555_U	Eukaryota;Alveolata;Dinoflagellata;Syndiniales;Dino-Group-II;Dino-Group-II-Clade-4;Dino-Group-II-Clade-4_X;Dino-Group-II-Clade-4_X_sp_;
Otu00356	0.0346316	8.72107	EU793417_1_1444_U	Eukaryota;Alveolata;Dinoflagellata;Syndiniales;Dino-Group-II;Dino-Group-II-Clade-6;Dino-Group-II-Clade-6_X;Dino-Group-II-Clade-6_X_sp_;
Otu01034	0.00189481	8.70923	EU793274_1_1572_U	Eukaryota;Alveolata;Dinoflagellata;Syndiniales;Dino-Group-II;Dino-Group-II-Clade-1;Dino-Group-II-Clade-1_X;Dino-Group-II-Clade-1_X_sp_;
Otu01205	0.00429185	8.6883	KJ759854_1_1798_U	Eukaryota;Alveolata;Dinoflagellata;Syndiniales;Dino-Group-III;Dino-Group-III_X;Dino-Group-III_XX;Dino-Group-III_XX_sp_;
Otu00813	0.000662041	8.6701	JX188356_1_1758_U	Eukaryota;Alveolata;Dinoflagellata;Dinophyceae;Prorocentrales;Prorocentraceae;Prorocentrum;Prorocentrum_sp_;
Otu01099	0.000593554	8.66667	JQ222940_1_1629_U	Eukaryota;Alveolata;Dinoflagellata;Syndiniales;Dino-Group-II;Dino-Group-II-Clade-30;Dino-Group-II-Clade-30_X;Dino-Group-II-Clade-30_X_sp_;
Otu00468	0.00166652	8.66504	KJ763753_1_1803_U	Eukaryota;Alveolata;Dinoflagellata;Syndiniales;Dino-Group-II;Dino-Group-II_X;Dino-Group-II_XX;Dino-Group-II_XX_sp_;
Otu01567	0.000479409	8.64706	MG972362_1_1813_G	Eukaryota;Stramenopiles;Ochrophyta;Bacillariophyta;Bacillariophyta_X;Polar-centric-Mediophyceae;Chaetoceros;Chaetoceros_circinalis;
Otu00559	0.00132408	8.62564	KF130611_1_1755_U	Eukaryota;Alveolata;Dinoflagellata;Syndiniales;Dino-Group-II;Dino-Group-II-Clade-14;Dino-Group-II-Clade-14_X;Dino-Group-II-Clade-14_X_sp_;
Otu00311	0.00203178	8.5818	KJ763454_1_1804_U	Eukaryota;Alveolata;Dinoflagellata;Syndiniales;Dino-Group-II;Dino-Group-II-Clade-10-and-11;Dino-Group-II-Clade-10-and-11_X;Dino-Group-II-Clade-10-and-11_X_sp_;
Otu00567	0.00166652	8.58132	KJ763489_1_1801_U	Eukaryota;Alveolata;Dinoflagellata;Syndiniales;Dino-Group-II;Dino-Group-II-Clade-1;Dino-Group-II-Clade-1_X;Dino-Group-II-Clade-1_X_sp_;
Otu01283	0.000616383	8.57647	KJ762980_1_1794_U	Eukaryota;Alveolata;Dinoflagellata;Syndiniales;Dino-Group-II;Dino-Group-II-Clade-1;Dino-Group-II-Clade-1_X;Dino-Group-II-Clade-1_X_sp_;
Otu02284	0.0185371	8.57315	KJ762870_1_1760_U	Eukaryota;Alveolata;Ciliophora;Spirotrichea;Strombidiida;Strombidiidae_J;Strombidiidae_J_X;Strombidiidae_J_X_sp_;
Otu01235	0.00171217	8.56164	HM749927_1_1482_U	Eukaryota;Alveolata;Dinoflagellata;Syndiniales;Dino-Group-II;Dino-Group-II-Clade-17;Dino-Group-II-Clade-17_X;Dino-Group-II-Clade-17_X_sp_;
Otu00134	0.242033	8.55396	EF526743_1_1556_U	Eukaryota;Alveolata;Dinoflagellata;Dinophyceae;Suessiales;Suessiaceae;Yihiella;Yihiella_yeosuensis;
Otu00321	0.0091316	8.55158	AY970653_1_1717_U	Eukaryota;Alveolata;Dinoflagellata;Dinophyceae;Peridiniales;Thoracosphaeraceae;Apocalathium;Apocalathium_aciculiferum;
Otu00363	0.00150671	8.54118	EU333080_1_800_U	Eukaryota;Alveolata;Dinoflagellata;Dinophyceae;Dinophyceae_X;Dinophyceae_XX;Dinophyceae_XXX;Dinophyceae_XXX_sp_;
Otu01547	0.0167565	8.53488	KC488484_1_1671_U	Eukaryota;Alveolata;Dinoflagellata;Syndiniales;Dino-Group-I;Dino-Group-I-Clade-1;Dino-Group-I-Clade-1_X;Dino-Group-I-Clade-1_X_sp_;
Otu00725	0.0183089	8.5335	KY290313_1_1621_U	Eukaryota;Alveolata;Ciliophora;Spirotrichea;Choreotrichida;Leegaardiellidae_B;Leegaardiella;Leegaardiella_sp_;
Otu01878	0.000707699	8.50442	JN832779_1_974_U	Eukaryota;Alveolata;Dinoflagellata;Syndiniales;Dino-Group-II;Dino-Group-II_X;Dino-Group-II_XX;Dino-Group-II_XX_sp_;
Otu00616	0.000867502	8.49412	KJ763753_1_1803_U	Eukaryota;Alveolata;Dinoflagellata;Syndiniales;Dino-Group-II;Dino-Group-II_X;Dino-Group-II_XX;Dino-Group-II_XX_sp_;
Otu02767	0.00111862	8.4841	KC583010_1_1802_U	Eukaryota;Stramenopiles;Opalozoa;MAST-3;MAST-3C;MAST-3C_X;MAST-3C_XX;MAST-3C_XX_sp_;
Otu01293	0.00162086	8.47227	KJ760591_1_1800_U	Eukaryota;Alveolata;Dinoflagellata;Syndiniales;Dino-Group-II;Dino-Group-II-Clade-10-and-11;Dino-Group-II-Clade-10-and-11_X;Dino-Group-II-Clade-10-and-11_X_sp_;
Otu00447	0.00351567	8.47	KF031735_1_1743_U	Eukaryota;Alveolata;Dinoflagellata;Syndiniales;Dino-Group-I;Dino-Group-I-Clade-4;Dino-Group-I-Clade-4_X;Dino-Group-I-Clade-4_X_sp_;
Otu00129	0.0239704	8.4693	KJ759305_1_1799_U	Eukaryota;Alveolata;Dinoflagellata;Dinophyceae;Dinophyceae_X;Dinophyceae_XX;Dinophyceae_XXX;Dinophyceae_XXX_sp_;
Otu00985	0.00246553	8.46444	KJ760688_1_1793_U	Eukaryota;Stramenopiles;Ochrophyta;Bacillariophyta;Bacillariophyta_X;Raphid-pennate;Raphid-pennate_X;Raphid-pennate_X_sp_;
Otu01071	0.000593554	8.45	EU792993_1_918_U	Eukaryota;Alveolata;Dinoflagellata;Syndiniales;Dino-Group-II;Dino-Group-II-Clade-19;Dino-Group-II-Clade-19_X;Dino-Group-II-Clade-19_X_sp_;
Otu00809	0.000799015	8.44828	AY421779_1_1789_U	Eukaryota;Alveolata;Dinoflagellata;Dinophyceae;Gymnodiniales;Gymnodiniaceae;Margalefidinium;Margalefidinium_polykrikoides;
Otu01691	0.00235139	8.43994	JF790979_1_1777_U	Eukaryota;Stramenopiles;Ochrophyta;Bacillariophyta;Bacillariophyta_X;Polar-centric-Mediophyceae;Cyclotella;Cyclotella_choctawhatcheeana;
Otu00449	0.00563876	8.42549	KJ763357_1_1803_U	Eukaryota;Alveolata;Dinoflagellata;Syndiniales;Dino-Group-II;Dino-Group-II-Clade-3;Dino-Group-II-Clade-3_X;Dino-Group-II-Clade-3_X_sp_;
Otu01663	0.0165967	8.40736	FN690248_1_1699_U	Eukaryota;Alveolata;Dinoflagellata;Dinophyceae;Dinophyceae_X;Dinophyceae_XX;Dinophyceae_XXX;Dinophyceae_XXX_sp_;
Otu01980	0.00155237	8.40727	JF790988_1_1777_U	Eukaryota;Alveolata;Dinoflagellata;Syndiniales;Dino-Group-I;Dino-Group-I-Clade-1;Dino-Group-I-Clade-1_X;Dino-Group-I-Clade-1_X_sp_;
Otu01372	0.00148388	8.3996	KC582906_1_1788_U	Eukaryota;Alveolata;Dinoflagellata;Syndiniales;Dino-Group-II;Dino-Group-II-Clade-14;Dino-Group-II-Clade-14_X;Dino-Group-II-Clade-14_X_sp_;
Otu00870	0.00253402	8.39877	KJ925267_1_1508_U	Eukaryota;Alveolata;Dinoflagellata;Dinophyceae;Dinophyceae_X;Dinophyceae_XX;Dinophyceae_XXX;Dinophyceae_XXX_sp_;
Otu00698	0.00168935	8.39877	EF526801_1_1331_U	Eukaryota;Alveolata;Dinoflagellata;Dinophyceae;Dinophyceae_X;Dinophyceae_XX;Dinophyceae_XXX;Dinophyceae_XXX_sp_;
Otu01802	0.000616383	8.37931	KJ763755_1_1799_U	Eukaryota;Alveolata;Dinoflagellata;Syndiniales;Dino-Group-II;Dino-Group-II-Clade-22;Dino-Group-II-Clade-22_X;Dino-Group-II-Clade-22_X_sp_;
Otu00679	0.00963384	8.36311	DQ915169_1_1585_U	Eukaryota;Alveolata;Dinoflagellata;Dinophyceae;Gymnodiniales;Gymnodiniaceae;Margalefidinium;Margalefidinium_polykrikoides;
Otu01105	0.000639212	8.34043	AY664879_1_1754_U	Eukaryota;Alveolata;Dinoflagellata;Dinophyceae;Dinophyceae_X;Dinophyceae_XX;Dinophyceae_XXX;Dinophyceae_XXX_sp_;
Otu00927	0.000662041	8.32673	EU793772_1_1655_U	Eukaryota;Alveolata;Dinoflagellata;Syndiniales;Dino-Group-II;Dino-Group-II-Clade-5;Dino-Group-II-Clade-5_X;Dino-Group-II-Clade-5_X_sp_;
Otu00689	0.000479409	8.32075	EU333058_1_800_U	Eukaryota;Alveolata;Dinoflagellata;Syndiniales;Dino-Group-II;Dino-Group-II-Clade-5;Dino-Group-II-Clade-5_X;Dino-Group-II-Clade-5_X_sp_;
Otu01665	0.00573008	8.30381	JQ340335_1_1776_U	Eukaryota;Apusozoa;Hilomonadea;Planomonadida;Planomonadidae;Planomonadidae_Group-1;Fabomonas;Fabomonas_tropica;
Otu00635	0.00127842	8.2963	KJ763810_1_1798_U	Eukaryota;Alveolata;Dinoflagellata;Syndiniales;Dino-Group-II;Dino-Group-II-Clade-1;Dino-Group-II-Clade-1_X;Dino-Group-II-Clade-1_X_sp_;
Otu00515	0.0222811	8.28399	KJ759290_1_1793_U	Eukaryota;Opisthokonta;Metazoa;Arthropoda;Crustacea;Maxillopoda;Maxillopoda_X;Maxillopoda_X_sp_;
Otu01324	0.0116656	8.26672	AY129037_1_1791_U	Eukaryota;Alveolata;Dinoflagellata;Syndiniales;Dino-Group-II;Dino-Group-II-Clade-32;Dino-Group-II-Clade-32_X;Dino-Group-II-Clade-32_X_sp_;
Otu00788	0.000388093	8.25714	KF130040_1_1763_U	Eukaryota;Hacrobia;Picozoa;Picozoa_X;Picozoa_XX;Picozoa_XXX;Picozoa_XXXX;Picozoa_XXXX_sp_;
Otu00737	0.0702905	8.2485	KC488367_1_1653_U	Eukaryota;Alveolata;Ciliophora;Spirotrichea;Choreotrichida;Strobilidiidae_I;Strobilidiidae_I_X;Strobilidiidae_I_X_sp_;
Otu00948	0.000890331	8.22162	EU143514_1_903_U	Eukaryota;Archaeplastida;Chlorophyta;Pyramimonadophyceae;Pyramimonadales;Pterospermaceae;Pterosperma;Pterosperma_sp_;
Otu00306	0.00406356	8.22107	EU446389_1_1555_U	Eukaryota;Alveolata;Dinoflagellata;Syndiniales;Dino-Group-II;Dino-Group-II-Clade-4;Dino-Group-II-Clade-4_X;Dino-Group-II-Clade-4_X_sp_;
Otu00708	0.000981647	8.21778	EF172980_1_1681_U	Eukaryota;Hacrobia;Haptophyta;Prymnesiophyceae;Calcihaptophycidae;Calcihaptophycidae_X;Calcihaptophycidae_XX;Calcihaptophycidae_XX_sp_;
Otu00990	0.000616383	8.19101	HQ026766_1_1127_U	Eukaryota;Opisthokonta;Choanoflagellida;Choanoflagellatea;Acanthoecida;Stephanoecidae_Group_H;Stephanoeca_Group_H;Stephanoeca_cauliculata;
Otu00779	0.000958818	8.16667	KJ759428_1_1798_U	Eukaryota;Alveolata;Dinoflagellata;Dinophyceae;Dinophyceae_X;Dinophyceae_XX;Dinophyceae_XXX;Dinophyceae_XXX_sp_;
Otu00451	0.016414	8.15074	DQ103795_1_1696_U	Eukaryota;Stramenopiles;Opalozoa;Bicoecea;Bicoecales;Bicoecaceae;Bicoecaceae_X;Bicoecaceae_X_sp_;
Otu00803	0.000525067	8.13846	KJ762603_1_1796_U	Eukaryota;Alveolata;Dinoflagellata;Syndiniales;Dino-Group-II;Dino-Group-II-Clade-3;Dino-Group-II-Clade-3_X;Dino-Group-II-Clade-3_X_sp_;
Otu01308	0.00166652	8.13588	EU780592_1_1704_U	Eukaryota;Alveolata;Dinoflagellata;Syndiniales;Dino-Group-II;Dino-Group-II-Clade-1;Dino-Group-II-Clade-1_X;Dino-Group-II-Clade-1_X_sp_;
Otu00673	0.0022829	8.13008	FN598264_1_1141_U	Eukaryota;Alveolata;Dinoflagellata;Dinophyceae;Dinophyceae_X;Dinophyceae_XX;Dinophyceae_XXX;Dinophyceae_XXX_sp_;
Otu00945	0.00390376	8.12927	JF730844_1_1710_U	Eukaryota;Alveolata;Dinoflagellata;Dinophyceae;Gymnodiniales;Chytriodiniaceae;Chytriodinium;Chytriodinium_roseum;
Otu00642	0.000799015	8.11258	MG972282_1_1712_U	Eukaryota;Stramenopiles;Ochrophyta;Bacillariophyta;Bacillariophyta_X;Polar-centric-Mediophyceae;Chaetoceros;Chaetoceros_lauderi;
Otu01242	0.000867502	8.11236	KJ759731_1_1795_U	Eukaryota;Alveolata;Dinoflagellata;Syndiniales;Dino-Group-II;Dino-Group-II-Clade-3;Dino-Group-II-Clade-3_X;Dino-Group-II-Clade-3_X_sp_;
Otu01029	0.000867502	8.11236	AF070445_1_1802_U	Eukaryota;Opisthokonta;Mesomycetozoa;Ichthyosporea;Ichthyosphonida;Pseudoperkinsidae;Anurofeca;Anurofeca_richardsi;
Otu01135	0.00780752	8.10337	EU399534_1_1685_U	Eukaryota;Alveolata;Ciliophora;Spirotrichea;Tintinnida;Eutintinnidae;Eutintinnus;Eutintinnus_fraknoi;
Otu00494	0.0209342	8.09988	AY789780_1_1176_U	Eukaryota;Stramenopiles;Opalozoa;Bicoecea;Bicoecea_X;Bicoecea_XX;Bicoecea_XXX;Bicoecea_XXX_sp_;
Otu00934	0.00091316	8.08081	EF172965_1_1680_U	Eukaryota;Alveolata;Dinoflagellata;Syndiniales;Dino-Group-II;Dino-Group-II-Clade-1;Dino-Group-II-Clade-1_X;Dino-Group-II-Clade-1_X_sp_;
Otu00742	0.000707699	8.07563	KC814811_1_1731_U	Eukaryota;Stramenopiles;Ochrophyta;Bacillariophyta;Bacillariophyta_X;Radial-centric-basal-Coscinodiscophyceae;Leptocylindrus;Leptocylindrus_convexus;
Otu01538	0.00125559	8.06667	KC488375_1_1634_U	Eukaryota;Alveolata;Ciliophora;Nassophorea;Nassophorea_X;Discotrichidae;NASSO_1;NASSO_1_sp_;
Otu00783	0.000433751	8.02222	KF130258_1_1759_U	Eukaryota;Alveolata;Dinoflagellata;Dinophyceae;Prorocentrales;Prorocentraceae;Prorocentrum;Prorocentrum_sp_;
Otu00601	0.000433751	8.02222	AY129049_1_1796_U	Eukaryota;Alveolata;Dinoflagellata;Syndiniales;Dino-Group-II;Dino-Group-II-Clade-16;Dino-Group-II-Clade-16_X;Dino-Group-II-Clade-16_X_sp_;
Otu00815	0.000662041	8.00952	EU446389_1_1555_U	Eukaryota;Alveolata;Dinoflagellata;Syndiniales;Dino-Group-II;Dino-Group-II-Clade-4;Dino-Group-II-Clade-4_X;Dino-Group-II-Clade-4_X_sp_;
Otu00039	1.10579	8.00244	DQ868351_1_1731_U	Eukaryota;Alveolata;Ciliophora;Oligohymenophorea;Peritrichia_2;Zoothamniidae;Zoothamnium_2;Zoothamnium_pelagicum;
Otu01264	0.000821844	8	JX188315_1_1762_U	Eukaryota;Archaeplastida;Chlorophyta;Chloropicophyceae;Chloropicales;Chloropicaceae;Chloropicon;Chloropicon_maureeniae;
Otu01144	0.00045658	8	KC306524_1_1192_U	Eukaryota;Stramenopiles;Opalozoa;MAST-12;MAST-12C;MAST-12C_X;MAST-12C_XX;MAST-12C_XX_sp_;
Otu01103	0.000639212	8	EF173006_1_1680_U	Eukaryota;Alveolata;Dinoflagellata;Syndiniales;Dino-Group-II;Dino-Group-II-Clade-5;Dino-Group-II-Clade-5_X;Dino-Group-II-Clade-5_X_sp_;
Otu00933	0.00045658	8	JX188350_1_1750_U	Eukaryota;Alveolata;Dinoflagellata;Syndiniales;Dino-Group-I;Dino-Group-I-Clade-5;Dino-Group-I-Clade-5_X;Dino-Group-I-Clade-5_X_sp_;
Otu00702	0.000365264	8	JQ226527_1_1594_U	Eukaryota;Opisthokonta;Choanoflagellida;Choanoflagellida_X;Choanoflagellida_XX;Choanoflagellida_XX_Clade-3;Choanoflagellida_XX_Clade-3_X;Choanoflagellida_XX_Clade-3_X_sp_;
Otu00583	0.00292211	7.9534	KC671630_1_1763_U	Eukaryota;Opisthokonta;Fungi;Basidiomycota;Pucciniomycotina;Pucciniomycetes;Pucciniomycetes_X;Pucciniomycetes_X_sp_;
Otu01259	0.0010273	7.94118	JN832779_1_974_U	Eukaryota;Alveolata;Dinoflagellata;Syndiniales;Dino-Group-II;Dino-Group-II_X;Dino-Group-II_XX;Dino-Group-II_XX_sp_;
Otu00659	0.00136974	7.92952	EF023464_1_1804_U	Eukaryota;Stramenopiles;Pseudofungi;Oomycota;Oomycota_X;Leptomitales;Leptomitales_X;Leptomitales_X_sp_;
Otu00663	0.0224181	7.91545	MF527268_1_1717_U	Eukaryota;Alveolata;Ciliophora;Spirotrichea;Strombidiida;Strombidiidae_K;Strombidium_K;Strombidium_K_sp_;
Otu01371	0.00253402	7.90314	FN690015_1_1660_U	Eukaryota;Alveolata;Ciliophora;Oligohymenophorea;Scuticociliatia_1;Thigmophryidae;Myxophyllum;Myxophyllum_sp_;
Otu01344	0.00100448	7.86992	KJ763787_1_1802_U	Eukaryota;Alveolata;Dinoflagellata;Dinophyceae;Dinophyceae_X;Dinophyceae_XX;Dinophyceae_XXX;Dinophyceae_XXX_sp_;
Otu01185	0.000593554	7.86047	KJ760688_1_1793_U	Eukaryota;Stramenopiles;Ochrophyta;Bacillariophyta;Bacillariophyta_X;Raphid-pennate;Raphid-pennate_X;Raphid-pennate_X_sp_;
Otu01231	0.00353849	7.85387	GU355681_1_1600_U	Eukaryota;Alveolata;Dinoflagellata;Noctilucophyceae;Noctilucales;Kofoidiniaceae;Kofoidinium;Kofoidinium_sp_;
Otu00177	0.19964	7.84913	EU793925_1_1594_U	Eukaryota;Alveolata;Dinoflagellata;Syndiniales;Dino-Group-II;Dino-Group-II-Clade-10-and-11;Dino-Group-II-Clade-10-and-11_X;Dino-Group-II-Clade-10-and-11_X_sp_;
Otu00953	0.00123277	7.83871	HM581709_1_1797_U	Eukaryota;Alveolata;Dinoflagellata;Syndiniales;Dino-Group-II;Dino-Group-II_X;Dino-Group-II_XX;Dino-Group-II_XX_sp_;
Otu00611	0.000844673	7.82286	AY208893_1_1819_U	Eukaryota;Alveolata;Dinoflagellata;Syndiniales;Dino-Group-II;Dino-Group-II-Clade-4;Amoebophrya;Amoebophrya_ceratii;
Otu00958	0.000502238	7.80645	JX188346_1_1760_U	Eukaryota;Alveolata;Dinoflagellata;Syndiniales;Dino-Group-II;Dino-Group-II-Clade-13;Dino-Group-II-Clade-13_X;Dino-Group-II-Clade-13_X_sp_;
Otu01064	0.00125559	7.77635	KJ759651_1_1791_U	Eukaryota;Alveolata;Dinoflagellata;Syndiniales;Dino-Group-II;Dino-Group-II_X;Dino-Group-II_XX;Dino-Group-II_XX_sp_;
Otu01047	0.00732811	7.77609	AY208893_1_1819_U	Eukaryota;Alveolata;Dinoflagellata;Syndiniales;Dino-Group-II;Dino-Group-II-Clade-4;Amoebophrya;Amoebophrya_ceratii;
Otu00519	0.00114145	7.76398	AY664973_1_1755_U	Eukaryota;Alveolata;Dinoflagellata;Dinophyceae;Dinophyceae_X;Dinophyceae_XX;Dinophyceae_XXX;Dinophyceae_XXX_sp_;
Otu01179	0.00107296	7.75088	KC488466_1_1698_U	Eukaryota;Alveolata;Dinoflagellata;Syndiniales;Dino-Group-II;Dino-Group-II-Clade-13;Dino-Group-II-Clade-13_X;Dino-Group-II-Clade-13_X_sp_;
Otu00376	0.00184915	7.74616	KJ760688_1_1793_U	Eukaryota;Stramenopiles;Ochrophyta;Bacillariophyta;Bacillariophyta_X;Raphid-pennate;Raphid-pennate_X;Raphid-pennate_X_sp_;
Otu00263	0.133527	7.74031	KJ763316_1_1790_U	Eukaryota;Opisthokonta;Choanoflagellida;Choanoflagellatea;Acanthoecida;Stephanoecidae_Group_D;Stephanoecidae_Group_D_X;Stephanoecidae_Group_D_X_sp_;
Otu01508	0.000479409	7.73684	EF526923_1_1327_U	Eukaryota;Alveolata;Ciliophora;Spirotrichea;Strombidiida;Strombidiidae_A;Strombidiidae_A_X;Strombidiidae_A_X_sp_;
Otu00808	0.000981647	7.7364	AF180940_1_1800_U	Eukaryota;Hacrobia;Haptophyta;Prymnesiophyceae;Phaeocystales;Phaeocystaceae;Phaeocystis;Phaeocystis_sp_;
Otu00718	0.0029906	7.73366	AF164245_1_1743_U	Eukaryota;Opisthokonta;Fungi;Chytridiomycota;Chytridiomycotina;Chytridiomycetes;Powellomyces;Powellomyces_sp_;
Otu00894	0.0842618	7.72284	KC582957_1_1757_U	Eukaryota;Alveolata;Ciliophora;Spirotrichea;Choreotrichida;Strobilidiidae_I;Strobilidiidae_I_X;Strobilidiidae_I_X_sp_;
Otu01583	0.000890331	7.72081	KJ764339_1_1797_U	Eukaryota;Alveolata;Dinoflagellata;Dinophyceae;Dinophyceae_X;Dinophyceae_XX;Dinophyceae_XXX;Dinophyceae_XXX_sp_;
Otu00771	0.000410922	7.71429	AY129038_1_1800_U	Eukaryota;Alveolata;Dinoflagellata;Syndiniales;Dino-Group-II;Dino-Group-II-Clade-3;Dino-Group-II-Clade-3_X;Dino-Group-II-Clade-3_X_sp_;
Otu01053	0.000593554	7.68182	KC488458_1_1677_U	Eukaryota;Alveolata;Dinoflagellata;Syndiniales;Dino-Group-I;Dino-Group-I-Clade-4;Dino-Group-I-Clade-4_X;Dino-Group-I-Clade-4_X_sp_;
Otu01471	0.0114145	7.67672	KJ759731_1_1795_U	Eukaryota;Alveolata;Dinoflagellata;Syndiniales;Dino-Group-II;Dino-Group-II-Clade-3;Dino-Group-II-Clade-3_X;Dino-Group-II-Clade-3_X_sp_;
Otu00476	0.0022829	7.66871	KF129848_1_1753_U	Eukaryota;Alveolata;Dinoflagellata;Syndiniales;Dino-Group-I;Dino-Group-I-Clade-5;Dino-Group-I-Clade-5_X;Dino-Group-I-Clade-5_X_sp_;
Otu00167	0.042188	7.66764	AY664926_1_1754_U	Eukaryota;Alveolata;Dinoflagellata;Dinophyceae;Dinophyceae_X;Dinophyceae_XX;Dinophyceae_XXX;Dinophyceae_XXX_sp_;
Otu00901	0.00105013	7.66667	AF509625_1_1681_U	Eukaryota;Archaeplastida;Chlorophyta;Mamiellophyceae;Dolichomastigales;Dolichomastigaceae;Dolichomastix;Dolichomastix_tenuilepis;
Otu00939	0.000525067	7.66667	AY885029_1_1278_U	Eukaryota;Alveolata;Dinoflagellata;Syndiniales;Dino-Group-II;Dino-Group-II-Clade-39;Dino-Group-II-Clade-39_X;Dino-Group-II-Clade-39_X_sp_;
Otu02173	0.00171217	7.65306	EU793923_1_925_U	Eukaryota;Alveolata;Dinoflagellata;Dinophyceae;Dinophyceae_X;Dinophyceae_XX;Dinophyceae_XXX;Dinophyceae_XXX_sp_;
Otu00475	0.0115515	7.63739	EF032799_1_1739_U	Eukaryota;Stramenopiles;Ochrophyta;Chrysophyceae;Chrysophyceae_X;Chrysophyceae_Clade-C;Chrysophyceae_Clade-C_X;Chrysophyceae_Clade-C_X_sp_;
Otu01048	0.00901745	7.61358	EU446389_1_1555_U	Eukaryota;Alveolata;Dinoflagellata;Syndiniales;Dino-Group-II;Dino-Group-II-Clade-4;Dino-Group-II-Clade-4_X;Dino-Group-II-Clade-4_X_sp_;
Otu00430	0.00248836	7.61115	KJ763310_1_1809_U	Eukaryota;Stramenopiles;Ochrophyta;MOCH-2;MOCH-2_X;MOCH-2_XX;MOCH-2_XXX;MOCH-2_XXX_sp_;
Otu00542	0.000867502	7.6	KC582917_1_1798_U	Eukaryota;Alveolata;Dinoflagellata;Syndiniales;Dino-Group-II;Dino-Group-II-Clade-22;Dino-Group-II-Clade-22_X;Dino-Group-II-Clade-22_X_sp_;
Otu00289	0.0262305	7.59561	AB771864_1_1673_U	Eukaryota;Stramenopiles;Ochrophyta;Chrysophyceae;Chrysophyceae_X;Chrysophyceae_Clade-C;Chrysophyceae_Clade-C_X;Chrysophyceae_Clade-C_X_sp_;
Otu00975	0.00591271	7.58749	FJ410734_1_800_U	Eukaryota;Alveolata;Ciliophora;Oligohymenophorea;Scuticociliatia_1;Philasterida;Philasterida_X;Philasterida_X_sp_;
Otu00052	0.590152	7.54027	DQ317538_1_1799_U	Eukaryota;Alveolata;Dinoflagellata;Dinophyceae;Peridiniales;Blastodiniaceae;Blastodinium;Blastodinium_navicula;
Otu00937	0.000319606	7.53846	EF527097_1_1338_U	Eukaryota;Stramenopiles;Ochrophyta;Bolidophyceae;Parmales;Parmales_X;Parmales_XX;Parmales_XX_sp_;
Otu01442	0.000365264	7.52941	AB158373_1_1755_U	Eukaryota;Archaeplastida;Chlorophyta;Nephroselmidophyceae;Nephroselmidales;Nephroselmidales_X;Nephroselmis;Nephroselmis_anterostigmatica;
Otu01543	0.00120994	7.45093	FJ410514_1_800_U	Eukaryota;Alveolata;Ciliophora;Spirotrichea;Choreotrichida;Strobilidiidae_I;Pelagostrobilidium;Pelagostrobilidium_sp_;
Otu00847	0.00182632	7.44186	EU446389_1_1555_U	Eukaryota;Alveolata;Dinoflagellata;Syndiniales;Dino-Group-II;Dino-Group-II-Clade-4;Dino-Group-II-Clade-4_X;Dino-Group-II-Clade-4_X_sp_;
Otu01130	0.000388093	7.41026	HQ394099_1_841_U	Eukaryota;Stramenopiles;Ochrophyta;Bacillariophyta;Bacillariophyta_X;Radial-centric-basal-Coscinodiscophyceae;Leptocylindrus;Leptocylindrus_sp_;
Otu01954	0.000753357	7.40816	AACY023494476_62_1613_U	Eukaryota;Stramenopiles;Sagenista;MAST-7;MAST-7D;MAST-7D_X;MAST-7D_XX;MAST-7D_XX_sp_;
Otu00399	0.00111862	7.38769	KJ759323_1_1791_U	Eukaryota;Alveolata;Dinoflagellata;Dinophyceae;Dinophyceae_X;Dinophyceae_XX;Dinophyceae_XXX;Dinophyceae_XXX_sp_;
Otu01059	0.00111862	7.38769	KJ759286_1_1796_U	Eukaryota;Alveolata;Dinoflagellata;Dinophyceae;Dinophyceae_X;Dinophyceae_XX;Dinophyceae_XXX;Dinophyceae_XXX_sp_;
Otu01351	0.00168935	7.38005	KJ759388_1_1798_U	Eukaryota;Alveolata;Dinoflagellata;Syndiniales;Dino-Group-II;Dino-Group-II-Clade-39;Dino-Group-II-Clade-39_X;Dino-Group-II-Clade-39_X_sp_;
Otu00986	0.0101361	7.35912	FJ422992_1_1775_U	Eukaryota;Alveolata;Ciliophora;Spirotrichea;Strombidiida;Strombidiidae;Strombidium;Strombidium_conicum;
Otu00753	0.00301343	7.35811	JQ031283_1_4556_U	Eukaryota;Stramenopiles;Pseudofungi;Oomycota;Oomycota_X;Oomycota_XX;Chlamydomyzium;Chlamydomyzium_sp_;
Otu01327	0.000570725	7.35294	EU333058_1_800_U	Eukaryota;Alveolata;Dinoflagellata;Syndiniales;Dino-Group-II;Dino-Group-II-Clade-5;Dino-Group-II-Clade-5_X;Dino-Group-II-Clade-5_X_sp_;
Otu01514	0.00799015	7.35118	AF022201_1_1803_U	Eukaryota;Alveolata;Dinoflagellata;Dinophyceae;Peridiniales;Thoracosphaeraceae;Pentapharsodinium;Pentapharsodinium_tyrrhenicum;
Otu01910	0.0144508	7.34522	AY665090_1_1708_U	Eukaryota;Alveolata;Ciliophora;Nassophorea;Nassophorea_X;Discotrichidae;NASSO_1;NASSO_1_sp_;
Otu00952	0.00182632	7.32265	EU793924_1_918_U	Eukaryota;Alveolata;Dinoflagellata;Syndiniales;Dino-Group-II;Dino-Group-II-Clade-4;Dino-Group-II-Clade-4_X;Dino-Group-II-Clade-4_X_sp_;
Otu01820	0.000730528	7.31429	KC488537_1_1689_U	Eukaryota;Stramenopiles;Opalozoa;MAST-3;MAST-3B;MAST-3B_X;MAST-3B_XX;MAST-3B_XX_sp_;
Otu00811	0.000662041	7.31304	AJ402350_1_1758_U	Eukaryota;Stramenopiles;Pseudofungi;MAST-1;MAST-1D;MAST-1D_X;MAST-1D_XX;MAST-1D_XX_sp_;
Otu00481	0.0199525	7.30115	MG972304_1_1692_U	Eukaryota;Stramenopiles;Ochrophyta;Bacillariophyta;Bacillariophyta_X;Polar-centric-Mediophyceae;Chaetoceros;Chaetoceros_pseudocurvisetus;
Otu01695	0.00778469	7.26802	KJ757211_1_1741_U	Eukaryota;Alveolata;Ciliophora;Spirotrichea;Choreotrichida;Leegaardiellidae_B;Leegaardiella;Leegaardiella_sp_;
Otu00395	0.00178066	7.26014	KF130203_1_1759_U	Eukaryota;Alveolata;Dinoflagellata;Syndiniales;Dino-Group-II;Dino-Group-II-Clade-5;Dino-Group-II-Clade-5_X;Dino-Group-II-Clade-5_X_sp_;
Otu00750	0.00068487	7.25806	KJ759290_1_1793_U	Eukaryota;Opisthokonta;Metazoa;Arthropoda;Crustacea;Maxillopoda;Maxillopoda_X;Maxillopoda_X_sp_;
Otu01566	0.000342435	7.25806	AF363186_1_1797_U	Eukaryota;Stramenopiles;Pseudofungi;MAST-2;MAST-2B;MAST-2B_X;MAST-2B_XX;MAST-2B_XX_sp_;
Otu01335	0.000799015	7.24852	AF372762_1_1583_U	Eukaryota;Stramenopiles;Pseudofungi;Oomycota;Oomycota_X;Haliphthorales;Haliphthorales_X;Haliphthorales_X_sp_;
Otu01936	0.00194046	7.23223	AY208893_1_1819_U	Eukaryota;Alveolata;Dinoflagellata;Syndiniales;Dino-Group-II;Dino-Group-II-Clade-4;Amoebophrya;Amoebophrya_ceratii;
Otu01535	0.000935989	7.21459	KJ759499_1_1794_U	Eukaryota;Alveolata;Dinoflagellata;Syndiniales;Dino-Group-II;Dino-Group-II-Clade-9;Dino-Group-II-Clade-9_X;Dino-Group-II-Clade-9_X_sp_;
Otu01233	0.00237422	7.21067	DQ093795_1_1761_U	Eukaryota;Alveolata;Apicomplexa;Gregarinomorphea;Eugregarinorida;Lecudinidae;Lithocystis;Lithocystis_sp_;
Otu00577	0.00814995	7.20092	JX841772_1_562_U	Eukaryota;Alveolata;Apicomplexa;Gregarinomorphea;Gregarinomorphea_X_GRE2;Gregarinomorphea_X_GRE2_X;Gregarinomorphea_X_GRE2_XX;Gregarinomorphea_X_GRE2_XX_sp_;
Otu01249	0.000273948	7.2	FN690525_1_1680_U	Eukaryota;Stramenopiles;Ochrophyta;Bacillariophyta;Bacillariophyta_X;Raphid-pennate;Raphid-pennate_X;Raphid-pennate_X_sp_;
Otu01519	0.0014154	7.1985	AY421778_1_1789_U	Eukaryota;Alveolata;Dinoflagellata;Dinophyceae;Gonyaulacales;Goniodomataceae;Alexandrium;Alexandrium_affine;
Otu00427	0.00139257	7.19729	AJ535376_1_1779_U	Eukaryota;Alveolata;Dinoflagellata;Dinophyceae;Gonyaulacales;Goniodomataceae;Alexandrium;Alexandrium_tamutum;
Otu00814	0.000570725	7.18391	KJ762603_1_1796_U	Eukaryota;Alveolata;Dinoflagellata;Syndiniales;Dino-Group-II;Dino-Group-II-Clade-3;Dino-Group-II-Clade-3_X;Dino-Group-II-Clade-3_X_sp_;
Otu00994	0.012145	7.14996	AM490989_1_1728_U	Eukaryota;Hacrobia;Haptophyta;Prymnesiophyceae;Coccolithales;Coccolithales_X;Coccolithales_XX;Coccolithales_XX_sp_;
Otu02055	0.00091316	7.14286	HQ446967_1_1794_U	Eukaryota;Alveolata;Dinoflagellata;Syndiniales;Dino-Group-II;Dino-Group-II_X;Dino-Group-II_XX;Dino-Group-II_XX_sp_;
Otu01762	0.00751074	7.12534	KF130246_1_1746_U	Eukaryota;Alveolata;Dinoflagellata;Syndiniales;Dino-Group-I;Dino-Group-I-Clade-3;Dino-Group-I-Clade-3_X;Dino-Group-I-Clade-3_X_sp_;
Otu00867	0.000707699	7.11852	KJ763439_1_1796_U	Eukaryota;Alveolata;Dinoflagellata;Syndiniales;Dino-Group-II;Dino-Group-II-Clade-1;Dino-Group-II-Clade-1_X;Dino-Group-II-Clade-1_X_sp_;
Otu01323	0.000251119	7.11765	JQ226527_1_1594_U	Eukaryota;Opisthokonta;Choanoflagellida;Choanoflagellida_X;Choanoflagellida_XX;Choanoflagellida_XX_Clade-3;Choanoflagellida_XX_Clade-3_X;Choanoflagellida_XX_Clade-3_X_sp_;
Otu01194	0.000365264	7.11111	JN975247_1_1624_U	Eukaryota;Stramenopiles;Ochrophyta;Bacillariophyta;Bacillariophyta_X;Araphid-pennate;Hyalosira;Hyalosira_interrupta;
Otu00884	0.00956535	7.07536	AY103189_1_1759_U	Eukaryota;Alveolata;Ciliophora;Oligohymenophorea;Scuticociliatia_1;Philasterida;Mesanophrys;Mesanophrys_carcini;
Otu00242	0.0488541	7.07366	AB534471_1_1608_U	Eukaryota;Opisthokonta;Fungi;Ascomycota;Pezizomycotina;Dothideomycetes;Dothideomycetes_X;Dothideomycetes_X_sp_;
Otu00950	0.0014154	7.06618	KJ762196_1_1799_U	Eukaryota;Alveolata;Dinoflagellata;Dinophyceae;Dinophyceae_X;Dinophyceae_XX;Dinophyceae_XXX;Dinophyceae_XXX_sp_;
Otu00841	0.000525067	7.05333	KF130564_1_1762_U	Eukaryota;Hacrobia;Haptophyta;Prymnesiophyceae;Prymnesiales;Prymnesiophyceae_Clade_B4;Prymnesiophyceae_Clade_B4_X;Prymnesiophyceae_Clade_B4_X_sp_;
Otu01811	0.00351567	7.03739	GQ330583_1_1466_U	Eukaryota;Stramenopiles;Pseudofungi;Oomycota;Oomycota_X;Oomycota_XX;Oomycota_XXX;Oomycota_XXX_sp_;
Otu00848	0.00554745	7.02881	KF130307_1_1753_U	Eukaryota;Alveolata;Dinoflagellata;Syndiniales;Dino-Group-II;Dino-Group-II-Clade-1;Dino-Group-II-Clade-1_X;Dino-Group-II-Clade-1_X_sp_;
Otu00505	0.000753357	7.02581	EU333060_1_800_U	Eukaryota;Alveolata;Dinoflagellata;Dinophyceae;Dinophyceae_X;Dinophyceae_XX;Dinophyceae_XXX;Dinophyceae_XXX_sp_;
Otu00638	0.000570725	7.02247	AY665065_1_1754_U	Eukaryota;Alveolata;Dinoflagellata;Dinophyceae;Dinophyceae_X;Dinophyceae_XX;Dinophyceae_XXX;Dinophyceae_XXX_sp_;
Otu01271	0.00091316	7.01754	GU433170_1_556_U	Eukaryota;Alveolata;Ciliophora;CONThreeP;CONThreeP_X;CONThreeP_XX;Askenasia;Askenasia_sp_;
Otu01154	0.000890331	7.00922	KC582999_1_2114_U	Eukaryota;Stramenopiles;Ochrophyta;Chrysophyceae;Chrysophyceae_X;Chrysophyceae_Clade-H;Chrysophyceae_Clade-H_X;Chrysophyceae_Clade-H_X_sp_;
Otu11657	0.000319606	7	KF130203_1_1759_U	Eukaryota;Alveolata;Dinoflagellata;Syndiniales;Dino-Group-II;Dino-Group-II-Clade-5;Dino-Group-II-Clade-5_X;Dino-Group-II-Clade-5_X_sp_;
Otu38749	0.000159803	7	HQ394099_1_841_U	Eukaryota;Stramenopiles;Ochrophyta;Bacillariophyta;Bacillariophyta_X;Radial-centric-basal-Coscinodiscophyceae;Leptocylindrus;Leptocylindrus_sp_;
Otu02623	0.0024427	6.97684	EF526733_1_1577_U	Eukaryota;Stramenopiles;Stramenopiles_X;Stramenopiles_XX;Stramenopiles_XXX;Stramenopiles_XXXX;Stramenopiles_XXXXX;Stramenopiles_XXXXX_sp_;
Otu00350	0.00134691	6.97595	JF791009_1_1777_U	Eukaryota;Alveolata;Dinoflagellata;Syndiniales;Dino-Group-V;Dino-Group-V_X;Dino-Group-V_XX;Dino-Group-V_XX_sp_;
Otu00599	0.0202493	6.93439	AACY023494476_62_1613_U	Eukaryota;Stramenopiles;Sagenista;MAST-7;MAST-7D;MAST-7D_X;MAST-7D_XX;MAST-7D_XX_sp_;
Otu00893	0.00196329	6.92509	KC582897_1_1794_U	Eukaryota;Alveolata;Dinoflagellata;Syndiniales;Dino-Group-II;Dino-Group-II-Clade-17;Dino-Group-II-Clade-17_X;Dino-Group-II-Clade-17_X_sp_;
Otu00766	0.000502238	6.91429	JF791074_1_1777_U	Eukaryota;Stramenopiles;Opalozoa;MAST-3;MAST-3E;MAST-3E_X;MAST-3E_XX;MAST-3E_XX_sp_;
Otu00863	0.0075564	6.90757	FN690341_1_830_U	Eukaryota;Alveolata;Dinoflagellata;Syndiniales;Dino-Group-II;Dino-Group-II-Clade-28;Dino-Group-II-Clade-28_X;Dino-Group-II-Clade-28_X_sp_;
Otu00549	0.00260251	6.90542	KC511789_1_1790_U	Eukaryota;Alveolata;Dinoflagellata;Dinophyceae;Peridiniales;Thoracosphaeraceae;Posoniella;Posoniella_tricarinelloides;
Otu01676	0.000593554	6.89796	EU780634_1_1716_U	Eukaryota;Alveolata;Dinoflagellata;Dinophyceae;Peridiniales;Amphidomataceae;Azadinium;Azadinium_sp_;
Otu00965	0.00107296	6.88162	AY775285_1_1789_U	Eukaryota;Alveolata;Dinoflagellata;Syndiniales;Dino-Group-II;Dino-Group-II-Clade-33;Dino-Group-II-Clade-33_X;Dino-Group-II-Clade-33_X_sp_;
Otu00852	0.0130125	6.88056	KJ759359_1_1776_U	Eukaryota;Alveolata;Dinoflagellata;Dinophyceae;Dinophyceae_X;Dinophyceae_XX;Dinophyceae_XXX;Dinophyceae_XXX_sp_;
Otu01555	0.00118711	6.86294	KF130233_1_1761_U	Eukaryota;Alveolata;Dinoflagellata;Syndiniales;Dino-Group-II;Dino-Group-II-Clade-4;Dino-Group-II-Clade-4_X;Dino-Group-II-Clade-4_X_sp_;
Otu03175	0.000547896	6.85714	AY485480_1_1703_U	Eukaryota;Stramenopiles;Ochrophyta;Bacillariophyta;Bacillariophyta_X;Radial-centric-basal-Coscinodiscophyceae;Rhizosolenia;Rhizosolenia_fallax;
Otu00477	0.000799015	6.84358	AY664925_1_1753_U	Eukaryota;Alveolata;Dinoflagellata;Dinophyceae;Dinophyceae_X;Dinophyceae_XX;Dinophyceae_XXX;Dinophyceae_XXX_sp_;
Otu01004	0.000342435	6.81818	DQ060524_1_1778_U	Eukaryota;Hacrobia;Picozoa;Picozoa_X;Picozoa_XX;Picozoa_XXX;Picozoa_XXXX;Picozoa_XXXX_sp_;
Otu01983	0.000342435	6.81818	AB191431_1_1719_U	Eukaryota;Opisthokonta;Fungi;Cryptomycota;Cryptomycotina;Cryptomycotina_X;Cryptomycotina_XX;Cryptomycotina_XX_sp_;
Otu01030	0.000342435	6.81818	AF167153_1_1799_U	Eukaryota;Stramenopiles;Ochrophyta;Bolidophyceae;Parmales;Triparmaceae;Triparma;Triparma_eleuthera;
Otu00193	0.00255685	6.81739	KJ758222_1_1798_U	Eukaryota;Alveolata;Dinoflagellata;Dinophyceae;Dinophyceae_X;Dinophyceae_XX;Dinophyceae_XXX;Dinophyceae_XXX_sp_;
Otu02444	0.000844673	6.81095	EU792932_1_914_U	Eukaryota;Alveolata;Dinoflagellata;Syndiniales;Dino-Group-II;Dino-Group-II-Clade-19;Dino-Group-II-Clade-19_X;Dino-Group-II-Clade-19_X_sp_;
Otu01415	0.000776186	6.8	EU143394_1_902_U	Eukaryota;Archaeplastida;Chlorophyta;Mamiellophyceae;Dolichomastigales;Crustomastigaceae;Crustomastigaceae-AB;Crustomastigaceae-AB_sp_;
Otu00665	0.000479409	6.78462	JQ956280_1_1704_U	Eukaryota;Alveolata;Dinoflagellata;Dinophyceae;Dinophyceae_X;Dinophyceae_XX;Dinophyceae_XXX;Dinophyceae_XXX_sp_;
Otu00903	0.000479409	6.78462	KF129788_1_1760_U	Eukaryota;Alveolata;Dinoflagellata;Syndiniales;Dino-Group-II;Dino-Group-II-Clade-12;Dino-Group-II-Clade-12_X;Dino-Group-II-Clade-12_X_sp_;
Otu00221	0.00687153	6.77695	DQ388461_1_1689_U	Eukaryota;Alveolata;Dinoflagellata;Noctilucophyceae;Noctilucales;Noctilucaceae;Noctiluca;Noctiluca_scintillans;
Otu01320	0.00223724	6.77292	KJ758045_1_1797_U	Eukaryota;Alveolata;Dinoflagellata;Dinophyceae;Dinophyceae_X;Dinophyceae_XX;Dinophyceae_XXX;Dinophyceae_XXX_sp_;
Otu00693	0.00120994	6.76867	KJ762960_1_1788_U	Eukaryota;Stramenopiles;Sagenista;MAST-4;MAST-4A;MAST-4A_X;MAST-4A_XX;MAST-4A_XX_sp_;
Otu01132	0.0356817	6.76267	JX188332_1_1721_U	Eukaryota;Alveolata;Ciliophora;Spirotrichea;Choreotrichida;Strobilidiidae_I;Pelagostrobilidium;Pelagostrobilidium_sp_;
Otu23530	0.00180349	6.76165	EF526904_1_1327_U	Eukaryota;Opisthokonta;Choanoflagellida;Choanoflagellatea;Acanthoecida;Stephanoecidae_Group_I;Stephanoecidae_Group_I_X;Stephanoecidae_Group_I_X_sp_;
Otu01209	0.000296777	6.76	KJ569265_1_1677_U	Eukaryota;Stramenopiles;Ochrophyta;Bacillariophyta;Bacillariophyta_X;Raphid-pennate;Amphora;Amphora_sp_;
Otu01525	0.000639212	6.75862	D31651_1_1775_U	Eukaryota;Opisthokonta;Fungi;Basidiomycota;Agaricomycotina;Tremellomycetes;Bullera;Bullera_miyagiana;
Otu00907	0.000410922	6.75	DQ832245_1_1188_U	Eukaryota;Opisthokonta;Fungi;Basidiomycota;Ustilaginomycotina;Exobasidiomycetes;Tilletia;Tilletia_controversa;
Otu01391	0.00196329	6.72364	KJ609050_1_1739_U	Eukaryota;Alveolata;Ciliophora;Spirotrichea;Strombidiida;Strombidiidae_B;Strombidium_B;Strombidium_tropicum;
Otu00446	0.0187198	6.72333	U41086_1_1797_U	Eukaryota;Alveolata;Dinoflagellata;Dinophyceae;Suessiales;Suessiaceae;Protodinium;Protodinium_simplex;
Otu00478	0.00155237	6.70145	AJ402353_1_1758_U	Eukaryota;Alveolata;Dinoflagellata;Syndiniales;Dino-Group-I;Dino-Group-I-Clade-6;Dino-Group-I-Clade-6_X;Dino-Group-I-Clade-6_X_sp_;
Otu01317	0.00367547	6.67895	LK934662_1_1754_U	Eukaryota;Alveolata;Dinoflagellata;Dinophyceae;Peridiniales;Thoracosphaeraceae;Aduncodinium;Aduncodinium_glandula;
Otu00459	0.0014154	6.67361	MG972234_1_1704_U	Eukaryota;Stramenopiles;Ochrophyta;Bacillariophyta;Bacillariophyta_X;Polar-centric-Mediophyceae;Chaetoceros;Chaetoceros_curvisetus_2a;
Otu01523	0.00125559	6.64835	KF129865_1_1761_U	Eukaryota;Alveolata;Dinoflagellata;Dinophyceae;Dinophyceae_X;Dinophyceae_XX;Dinophyceae_XXX;Dinophyceae_XXX_sp_;
Otu01019	0.00118711	6.62745	AF346419_1_1751_U	Eukaryota;Opisthokonta;Fungi;Ascomycota;Pezizomycotina;Eurotiomycetes;Glyphium;Glyphium_elatum;
Otu01450	0.000867502	6.62385	KJ763619_1_1795_U	Eukaryota;Alveolata;Dinoflagellata;Syndiniales;Dino-Group-II;Dino-Group-II-Clade-3;Dino-Group-II-Clade-3_X;Dino-Group-II-Clade-3_X_sp_;
Otu01401	0.00132408	6.62205	KC488414_1_1683_U	Eukaryota;Alveolata;Dinoflagellata;Dinophyceae;Dinophyceae_X;Dinophyceae_XX;Dinophyceae_XXX;Dinophyceae_XXX_sp_;
Otu01502	0.000844673	6.61353	DQ367048_1_1757_U	Eukaryota;Stramenopiles;Sagenista;Labyrinthulomycetes;Oblongichytrida;Oblongichytridiaceae;Oblongichytrium;Oblongichytrium_sp_;
Otu00701	0.00180349	6.60423	KC894152_1_1721_U	Eukaryota;Stramenopiles;Ochrophyta;Bacillariophyta;Bacillariophyta_X;Raphid-pennate;Tenuicylindrus;Tenuicylindrus_belgicus;
Otu00782	0.000753357	6.6	AF274051_1_1720_U	Eukaryota;Opisthokonta;Mesomycetozoa;Ichthyosporea;Ichthyosphonida;Ichthyophonidae_Amoebidianae;Amoebidium;Amoebidium_parasiticum;
Otu00158	0.0668433	6.59327	EF527109_1_1755_U	Eukaryota;Alveolata;Dinoflagellata;Dinophyceae;Gonyaulacales;Ceratiaceae;Ceratium;Ceratium_sp_;
Otu01067	0.00312757	6.59255	AY749515_1_1581_U	Eukaryota;Hacrobia;Centroheliozoa;Centroheliozoa_X;Pterocystida;Pterocystida_X;Pterocystida_XX;Pterocystida_XX_sp_;
Otu00623	0.0085837	6.58236	FJ541188_1_1769_U	Eukaryota;Alveolata;Dinoflagellata;Dinophyceae;Peridiniales;Blastodiniaceae;Blastodinium;Blastodinium_galatheanum;
Otu00898	0.00111862	6.54223	KP129435_1_506_U	Eukaryota;Alveolata;Ciliophora;CONThreeP;CONThreeP_X;CONThreeP_XX;Askenasia;Askenasia_sp_;
Otu00359	0.00906311	6.52112	KJ763195_1_1798_U	Eukaryota;Alveolata;Dinoflagellata;Syndiniales;Dino-Group-II;Dino-Group-II_X;Dino-Group-II_XX;Dino-Group-II_XX_sp_;
Otu01548	0.00168935	6.51905	KJ763122_1_1804_U	Eukaryota;Hacrobia;Centroheliozoa;Centroheliozoa_X;Pterocystida;Pterocystida_X;Pterocystida_XX;Pterocystida_XX_sp_;
Otu00932	0.000410922	6.48	AY919716_1_1731_U	Eukaryota;Alveolata;Dinoflagellata;Dinophyceae;Peridiniales;Thoracosphaeraceae;Thoracosphaeraceae_X;Thoracosphaeraceae_X_sp_;
Otu02006	0.000410922	6.48	KF129738_1_1746_U	Eukaryota;Stramenopiles;Opalozoa;MAST-3;MAST-3J;MAST-3J_X;MAST-3J_XX;MAST-3J_XX_sp_;
Otu00969	0.00107296	6.47801	AB016594_1_1792_U	Eukaryota;Alveolata;Dinoflagellata;Dinophyceae;Suessiales;Symbiodiniaceae;Fugacium;Fugacium_sp_;
Otu02137	0.000890331	6.47234	DQ409120_1_933_U	Eukaryota;Alveolata;Ciliophora;Spirotrichea;Choreotrichida;Strobilidiidae_C;Strobilidiidae_C_X;Strobilidiidae_C_X_sp_;
Otu00581	0.00741942	6.46459	JN832708_1_1770_U	Eukaryota;Alveolata;Dinoflagellata;Dinophyceae;Dinophyceae_X;Dinophyceae_XX;Dinophyceae_XXX;Dinophyceae_XXX_sp_;
Otu00913	0.00105013	6.45122	KJ760518_1_1794_U	Eukaryota;Alveolata;Dinoflagellata;Syndiniales;Dino-Group-II;Dino-Group-II-Clade-44;Dino-Group-II-Clade-44_X;Dino-Group-II-Clade-44_X_sp_;
Otu00746	0.000342435	6.42857	EU793216_1_1730_U	Eukaryota;Alveolata;Dinoflagellata;Syndiniales;Dino-Group-II;Dino-Group-II-Clade-10-and-11;Dino-Group-II-Clade-10-and-11_X;Dino-Group-II-Clade-10-and-11_X_sp_;
Otu00634	0.000639212	6.42623	AB237663_1_1750_U	Eukaryota;Opisthokonta;Fungi;Ascomycota;Pezizomycotina;Sordariomycetes;Nectria;Nectria_cinnabarina;
Otu00785	0.00134691	6.41068	KJ925435_1_1495_U	Eukaryota;Alveolata;Dinoflagellata;Dinophyceae;Dinophyceae_X;Dinophyceae_XX;Dinophyceae_XXX;Dinophyceae_XXX_sp_;
Otu00578	0.00114145	6.41026	KJ763489_1_1801_U	Eukaryota;Alveolata;Dinoflagellata;Syndiniales;Dino-Group-II;Dino-Group-II-Clade-1;Dino-Group-II-Clade-1_X;Dino-Group-II-Clade-1_X_sp_;
Otu00386	0.0675967	6.38031	KJ759457_1_1792_U	Eukaryota;Opisthokonta;Choanoflagellida;Choanoflagellida_X;Choanoflagellida_XX;Choanoflagellida_XXX;Choanoflagellida_XXXX;Choanoflagellida_XXXX_sp_;
Otu01142	0.000593554	6.37736	FN598264_1_1141_U	Eukaryota;Alveolata;Dinoflagellata;Dinophyceae;Dinophyceae_X;Dinophyceae_XX;Dinophyceae_XXX;Dinophyceae_XXX_sp_;
Otu00964	0.000593554	6.37736	EU793678_1_1564_U	Eukaryota;Alveolata;Dinoflagellata;Syndiniales;Dino-Group-II;Dino-Group-II-Clade-26;Dino-Group-II-Clade-26_X;Dino-Group-II-Clade-26_X_sp_;
Otu00619	0.00509087	6.35514	EU333067_1_800_U	Eukaryota;Alveolata;Dinoflagellata;Syndiniales;Dino-Group-I;Dino-Group-I-Clade-1;Dino-Group-I-Clade-1_X;Dino-Group-I-Clade-1_X_sp_;
Otu34419	0.00303626	6.35153	KJ759616_1_1766_U	Eukaryota;Alveolata;Ciliophora;Oligohymenophorea;OLIGO5;OLIGO5_X;OLIGO5_XX;OLIGO5_XX_sp_;
Otu01206	0.000730528	6.32099	KF130611_1_1755_U	Eukaryota;Alveolata;Dinoflagellata;Syndiniales;Dino-Group-II;Dino-Group-II-Clade-14;Dino-Group-II-Clade-14_X;Dino-Group-II-Clade-14_X_sp_;
Otu00406	0.00155237	6.31694	EU446389_1_1555_U	Eukaryota;Alveolata;Dinoflagellata;Syndiniales;Dino-Group-II;Dino-Group-II-Clade-4;Dino-Group-II-Clade-4_X;Dino-Group-II-Clade-4_X_sp_;
Otu02070	0.000981647	6.31058	KJ759692_1_1799_U	Eukaryota;Alveolata;Dinoflagellata;Syndiniales;Dino-Group-II;Dino-Group-II-Clade-10-and-11;Dino-Group-II-Clade-10-and-11_X;Dino-Group-II-Clade-10-and-11_X_sp_;
Otu00940	0.000753357	6.2948	KJ760035_1_1801_U	Eukaryota;Alveolata;Dinoflagellata;Syndiniales;Dino-Group-II;Dino-Group-II-Clade-7;Dino-Group-II-Clade-7_X;Dino-Group-II-Clade-7_X_sp_;
Otu00997	0.000547896	6.26087	EU143429_1_886_U	Eukaryota;Archaeplastida;Chlorophyta;Mamiellophyceae;Mamiellales;Mamiellaceae;RCC391;RCC391_sp_;
Otu01730	0.000296777	6.25926	EU143417_1_904_U	Eukaryota;Archaeplastida;Chlorophyta;Pyramimonadophyceae;Pyramimonadales;Halosphaeraceae;Halosphaera;Halosphaera_sp_;
Otu01334	0.00022829	6.25	KC582886_1_1799_U	Eukaryota;Alveolata;Dinoflagellata;Syndiniales;Dino-Group-II;Dino-Group-II-Clade-10-and-11;Dino-Group-II-Clade-10-and-11_X;Dino-Group-II-Clade-10-and-11_X_sp_;
Otu02678	0.00022829	6.25	EU143432_1_890_U	Eukaryota;Archaeplastida;Chlorophyta;Mamiellophyceae;Mamiellales;Mamiellaceae;Mantoniella;Mantoniella_clade_B;
Otu00768	0.000410922	6.23077	AJ402338_1_1758_U	Eukaryota;Alveolata;Dinoflagellata;Syndiniales;Dino-Group-II;Dino-Group-II-Clade-1;Dino-Group-II-Clade-1_X;Dino-Group-II-Clade-1_X_sp_;
Otu01152	0.000410922	6.23077	FR874662_1_1788_U	Eukaryota;Stramenopiles;Ochrophyta;Chrysophyceae;Chrysophyceae_X;Chrysophyceae_Clade-F;Chrysophyceae_Clade-F_X;Chrysophyceae_Clade-F_X_sp_;
Otu01829	0.000205461	6.23077	AB546639_1_1717_U	Eukaryota;Stramenopiles;Ochrophyta;Bolidophyceae;Parmales;Triparmaceae;Triparma;Triparma_laevis_f__inornata;
Otu02365	0.000205461	6.23077	AB275037_1_1702_U	Eukaryota;Stramenopiles;Pseudofungi;MAST-1;MAST-1C;MAST-1C_X;MAST-1C_XX;MAST-1C_XX_sp_;
Otu00840	0.0045658	6.23053	AY172592_1_1092_U	Eukaryota;Opisthokonta;Fungi;Ascomycota;Pezizomycotina;Sordariomycetes;Escovopsis;Escovopsis_sp_;
Otu00368	0.00221441	6.227	FN690467_1_805_U	Eukaryota;Opisthokonta;Mesomycetozoa;Ichthyosporea;Ichthyosphonida;Abeoformidae_Group_MAIP_1;Abeoformidae_Group_MAIP_1_X;Abeoformidae_Group_MAIP_1_X_sp_;
Otu00726	0.036047	6.21748	KJ763525_1_1749_U	Eukaryota;Alveolata;Ciliophora;Nassophorea;Nassophorea_X;Discotrichidae;NASSO_1;NASSO_1_sp_;
Otu00740	0.000479409	6.21127	KJ762978_1_1792_U	Eukaryota;Alveolata;Dinoflagellata;Syndiniales;Dino-Group-II;Dino-Group-II_X;Dino-Group-II_XX;Dino-Group-II_XX_sp_;
Otu00511	0.000730528	6.16867	KJ759352_1_1798_U	Eukaryota;Alveolata;Dinoflagellata;Dinophyceae;Dinophyceae_X;Dinophyceae_XX;Dinophyceae_XXX;Dinophyceae_XXX_sp_;
Otu19256	0.00296777	6.15441	JX841772_1_562_U	Eukaryota;Alveolata;Apicomplexa;Gregarinomorphea;Gregarinomorphea_X_GRE2;Gregarinomorphea_X_GRE2_X;Gregarinomorphea_X_GRE2_XX;Gregarinomorphea_X_GRE2_XX_sp_;
Otu00762	0.000593554	6.14545	KJ763489_1_1801_U	Eukaryota;Alveolata;Dinoflagellata;Syndiniales;Dino-Group-II;Dino-Group-II-Clade-1;Dino-Group-II-Clade-1_X;Dino-Group-II-Clade-1_X_sp_;
Otu01041	0.00545613	6.13215	EU780591_1_1638_U	Eukaryota;Alveolata;Dinoflagellata;Syndiniales;Dino-Group-II;Dino-Group-II-Clade-7;Dino-Group-II-Clade-7_X;Dino-Group-II-Clade-7_X_sp_;
Otu00632	0.0171446	6.12945	AF022192_1_1803_U	Eukaryota;Alveolata;Dinoflagellata;Dinophyceae;Gonyaulacales;Ceratiaceae;Tripos;Tripos_tenuis;
Otu01222	0.000319606	6.125	KJ763101_1_1798_U	Eukaryota;Alveolata;Dinoflagellata;Syndiniales;Dino-Group-II;Dino-Group-II-Clade-12;Dino-Group-II-Clade-12_X;Dino-Group-II-Clade-12_X_sp_;
Otu01469	0.000319606	6.125	MG972261_1_1718_U	Eukaryota;Stramenopiles;Ochrophyta;Bacillariophyta;Bacillariophyta_X;Polar-centric-Mediophyceae;Chaetoceros;Chaetoceros_diadema_2;
Otu01338	0.000319606	6.125	AB546639_1_1717_U	Eukaryota;Stramenopiles;Ochrophyta;Bolidophyceae;Parmales;Triparmaceae;Triparma;Triparma_laevis_f__inornata;
Otu00686	0.0290385	6.12121	AY789788_1_1185_U	Eukaryota;Opisthokonta;Choanoflagellida;Choanoflagellatea;Acanthoecida;Stephanoecidae_Group_H;Stephanoecidae_Group_H_X;Stephanoecidae_Group_H_X_sp_;
Otu01584	0.000707699	6.12102	AB807623_1_1624_U	Eukaryota;Archaeplastida;Chlorophyta;Ulvophyceae;Cladophorales;Cladophorales_X;Chaetomorpha;Chaetomorpha_sp_;
Otu00844	0.00981647	6.11765	AY775285_1_1789_U	Eukaryota;Alveolata;Dinoflagellata;Syndiniales;Dino-Group-II;Dino-Group-II-Clade-33;Dino-Group-II-Clade-33_X;Dino-Group-II-Clade-33_X_sp_;
Otu00466	0.00917726	6.10841	KF129922_1_1756_U	Eukaryota;Alveolata;Dinoflagellata;Syndiniales;Dino-Group-II;Dino-Group-II-Clade-7;Dino-Group-II-Clade-7_X;Dino-Group-II-Clade-7_X_sp_;
Otu01734	0.000342435	6.08108	JQ223103_1_1641_U	Eukaryota;Alveolata;Dinoflagellata;Syndiniales;Dino-Group-II;Dino-Group-II-Clade-7;Dino-Group-II-Clade-7_X;Dino-Group-II-Clade-7_X_sp_;
Otu01221	0.00068487	6.08108	KJ609050_1_1739_U	Eukaryota;Alveolata;Ciliophora;Spirotrichea;Strombidiida;Strombidiidae_B;Strombidium_B;Strombidium_tropicum;
Otu01907	0.000525067	6.08046	KF130522_1_1757_U	Eukaryota;Alveolata;Dinoflagellata;Syndiniales;Dino-Group-II;Dino-Group-II-Clade-2;Dino-Group-II-Clade-2_X;Dino-Group-II-Clade-2_X_sp_;
Otu02206	0.00116428	6.06294	FJ440623_1_1788_U	Eukaryota;Alveolata;Dinoflagellata;Syndiniales;Dino-Group-I;Dino-Group-I-Clade-3;Ichthyodinium;Ichthyodinium_chabelardi;
Otu01065	0.000981647	6.0623	AY789788_1_1185_U	Eukaryota;Opisthokonta;Choanoflagellida;Choanoflagellatea;Acanthoecida;Stephanoecidae_Group_H;Stephanoecidae_Group_H_X;Stephanoecidae_Group_H_X_sp_;
Otu00888	0.000479409	6.0411	KJ758222_1_1798_U	Eukaryota;Alveolata;Dinoflagellata;Dinophyceae;Dinophyceae_X;Dinophyceae_XX;Dinophyceae_XXX;Dinophyceae_XXX_sp_;
Otu01399	0.000479409	6.0411	AB295041_1_1728_U	Eukaryota;Alveolata;Dinoflagellata;Syndiniales;Dino-Group-I;Dino-Group-I-Clade-4;Euduboscquella;Euduboscquella_sp_;
Otu01331	0.00116428	6.0348	DQ851572_1_1726_U	Eukaryota;Opisthokonta;Fungi;Basidiomycota;Agaricomycotina;Agaricomycetes;Armillaria;Armillaria_tabescens;
Otu00826	0.0051137	6.00191	KJ759732_1_1797_U	Eukaryota;Alveolata;Dinoflagellata;Syndiniales;Dino-Group-II;Dino-Group-II-Clade-23;Dino-Group-II-Clade-23_X;Dino-Group-II-Clade-23_X_sp_;
Otu01426	0.000547896	6	KJ759290_1_1793_U	Eukaryota;Opisthokonta;Metazoa;Arthropoda;Crustacea;Maxillopoda;Maxillopoda_X;Maxillopoda_X_sp_;
Otu00930	0.000410922	6	KJ763909_1_1801_U	Eukaryota;Alveolata;Dinoflagellata;Dinophyceae;Prorocentrales;Prorocentraceae;Prorocentrum;Prorocentrum_sp_;
Otu01068	0.000273948	6	JQ223262_1_1636_U	Eukaryota;Stramenopiles;Pseudofungi;MAST-1;MAST-1C;MAST-1C_X;MAST-1C_XX;MAST-1C_XX_sp_;
Otu01255	0.00821844	5.95533	KJ925235_1_1651_U	Eukaryota;Alveolata;Ciliophora;CONTH_7;CONTH_7_X;CONTH_7_XX;CONTH_7_XXX;CONTH_7_XXX_sp_;
Otu01241	0.00114145	5.95238	KJ763459_1_1799_U	Eukaryota;Alveolata;Dinoflagellata;Syndiniales;Dino-Group-II;Dino-Group-II-Clade-26;Dino-Group-II-Clade-26_X;Dino-Group-II-Clade-26_X_sp_;
Otu00929	0.0021231	5.91992	KF129777_1_1754_U	Eukaryota;Alveolata;Dinoflagellata;Syndiniales;Dino-Group-II;Dino-Group-II-Clade-6;Dino-Group-II-Clade-6_X;Dino-Group-II-Clade-6_X_sp_;
Otu01834	0.000502238	5.90244	FJ537660_1_805_U	Eukaryota;Alveolata;Dinoflagellata;Syndiniales;Dino-Group-II;Dino-Group-II-Clade-10-and-11;Dino-Group-II-Clade-10-and-11_X;Dino-Group-II-Clade-10-and-11_X_sp_;
Otu00961	0.00308191	5.89997	KJ762918_1_1803_U	Eukaryota;Stramenopiles;Pseudofungi;MAST-1;MAST-1A;MAST-1A_X;MAST-1A_XX;MAST-1A_XX_sp_;
Otu01617	0.00111862	5.89926	KC306524_1_1192_U	Eukaryota;Stramenopiles;Opalozoa;MAST-12;MAST-12C;MAST-12C_X;MAST-12C_XX;MAST-12C_XX_sp_;
Otu02059	0.00436034	5.89259	KC488488_1_1684_U	Eukaryota;Alveolata;Dinoflagellata;Syndiniales;Dino-Group-II;Dino-Group-II-Clade-3;Dino-Group-II-Clade-3_X;Dino-Group-II-Clade-3_X_sp_;
Otu00784	0.000890331	5.87259	AB000953_1_1754_U	Eukaryota;Opisthokonta;Fungi;Ascomycota;Taphrinomycotina;Taphrinomycetes;Taphrina;Taphrina_maculans;
Otu00729	0.0220072	5.8678	KU715761_1_1762_U	Eukaryota;Alveolata;Ciliophora;Spirotrichea;Tintinnida;TIN_02;Tintinnopsis_02;Leprotintinnus_nordqvisti;
Otu01082	0.00424619	5.86572	AF123595_1_1804_U	Eukaryota;Stramenopiles;Ochrophyta;Bolidophyceae;Parmales;Triparmaceae;Triparma;Triparma_pacifica;
Otu02112	0.000639212	5.85075	KJ759427_1_1795_U	Eukaryota;Alveolata;Dinoflagellata;Syndiniales;Dino-Group-II;Dino-Group-II-Clade-10-and-11;Dino-Group-II-Clade-10-and-11_X;Dino-Group-II-Clade-10-and-11_X_sp_;
Otu01027	0.00509087	5.83742	DQ186535_1_1757_U	Eukaryota;Alveolata;Dinoflagellata;Syndiniales;Dino-Group-II;Dino-Group-II-Clade-13;Dino-Group-II-Clade-13_X;Dino-Group-II-Clade-13_X_sp_;
Otu01140	0.000296777	5.82759	KC488363_1_1629_U	Eukaryota;Alveolata;Ciliophora;Nassophorea;Nassophorea_X;Discotrichidae;NASSO_1;NASSO_1_sp_;
Otu02011	0.000296777	5.82759	EU333075_1_800_U	Eukaryota;Hacrobia;Telonemia;Telonemia_X;Telonemia_XX;Telonemia-Group-2;Telonemia-Group-2_X;Telonemia-Group-2_X_sp_;
Otu01084	0.000296777	5.82759	AF315604_1_1807_U	Eukaryota;Stramenopiles;Opalozoa;Bicoecea;Anoecales;Cafeteriaceae;Pseudobodo;Pseudobodo_tremulans;
Otu00851	0.00187198	5.80656	AY789777_1_1691_U	Eukaryota;Opisthokonta;Metazoa;Cnidaria;Cnidaria_X;Hydrozoa;Opercularella;Opercularella_pumila;
Otu00916	0.00123277	5.78571	AY165780_1_1774_U	Eukaryota;Archaeplastida;Chlorophyta;Ulvophyceae;Dasycladales;Dasycladales_X;Acetabularia;Acetabularia_calyculus;
Otu00465	0.0311388	5.78333	EF526887_1_1806_U	Eukaryota;Alveolata;Dinoflagellata;Dinophyceae;Dinophyceae_X;Dinophyceae_XX;Dinophyceae_XXX;Dinophyceae_XXX_sp_;
Otu00896	0.0261392	5.77297	KJ759720_1_1802_U	Eukaryota;Alveolata;Dinoflagellata;Dinophyceae;Dinophyceae_X;Dinophyceae_XX;Dinophyceae_XXX;Dinophyceae_XXX_sp_;
Otu01013	0.000342435	5.76923	KF129845_1_1752_U	Eukaryota;Alveolata;Dinoflagellata;Syndiniales;Dino-Group-II;Dino-Group-II-Clade-14;Dino-Group-II-Clade-14_X;Dino-Group-II-Clade-14_X_sp_;
Otu01805	0.000342435	5.76923	EU333083_1_800_U	Eukaryota;Alveolata;Dinoflagellata;Syndiniales;Dino-Group-II;Dino-Group-II-Clade-14;Dino-Group-II-Clade-14_X;Dino-Group-II-Clade-14_X_sp_;
Otu01949	0.000342435	5.76923	EU144000_1_800_U	Eukaryota;Apusozoa;Hilomonadea;Planomonadida;Planomonadidae;Planomonadidae_Group-1;Planomonadidae_Group-1_X;Planomonadidae_Group-1_X_sp_;
Otu01129	0.000319606	5.76471	EU780634_1_1716_U	Eukaryota;Alveolata;Dinoflagellata;Dinophyceae;Peridiniales;Amphidomataceae;Azadinium;Azadinium_sp_;
Otu01386	0.000753357	5.7619	AB810951_1_1789_U	Eukaryota;Stramenopiles;Sagenista;Labyrinthulomycetes;Thraustochytrida;Thraustochytriaceae;Labyrinthuloides;Labyrinthuloides_sp_;
Otu02384	0.000502238	5.7619	AY208894_1_1813_U	Eukaryota;Alveolata;Dinoflagellata;Syndiniales;Dino-Group-II;Dino-Group-II-Clade-1;Dino-Group-II-Clade-1_X;Dino-Group-II-Clade-1_X_sp_;
Otu01842	0.000251119	5.7619	KF129811_1_1755_U	Eukaryota;Alveolata;Dinoflagellata;Syndiniales;Dino-Group-II;Dino-Group-II-Clade-28;Dino-Group-II-Clade-28_X;Dino-Group-II-Clade-28_X_sp_;
Otu01410	0.000251119	5.7619	AY620349_1_1266_U	Eukaryota;Rhizaria;Cercozoa;Filosa-Thecofilosea;Ventricleftida;CCW10-lineage;CCW10-lineage_X;CCW10-lineage_X_sp_;
Otu01810	0.000730528	5.75281	FR877582_1_1752_U	Eukaryota;Alveolata;Dinoflagellata;Dinophyceae;Peridiniales;Peridiniales_X;Bysmatrum;Bysmatrum_gregarium;
Otu00971	0.00541047	5.74619	KJ759528_1_1804_U	Eukaryota;Alveolata;Dinoflagellata;Syndiniales;Dino-Group-III;Dino-Group-III_X;Dino-Group-III_XX;Dino-Group-III_XX_sp_;
Otu01106	0.000433751	5.73016	EU143427_1_886_U	Eukaryota;Archaeplastida;Chlorophyta;Mamiellophyceae;Mamiellales;Mamiellaceae;RCC391;RCC391_sp_;
Otu00644	0.0253174	5.72434	KJ763671_1_1796_U	Eukaryota;Alveolata;Dinoflagellata;Syndiniales;Dino-Group-II;Dino-Group-II-Clade-1;Dino-Group-II-Clade-1_X;Dino-Group-II-Clade-1_X_sp_;
Otu00517	0.0040179	5.71513	EU780646_1_1747_U	Eukaryota;Alveolata;Dinoflagellata;Dinophyceae;Dinophysiales;Dinophysiaceae;Histioneis;Histioneis_sp_;
Otu01192	0.00068487	5.6962	AF372763_1_1585_U	Eukaryota;Stramenopiles;Pseudofungi;Oomycota;Oomycota_X;Haliphthorales;Haliphthorales_X;Haliphthorales_X_sp_;
Otu00696	0.000981647	5.68923	EU333058_1_800_U	Eukaryota;Alveolata;Dinoflagellata;Syndiniales;Dino-Group-II;Dino-Group-II-Clade-5;Dino-Group-II-Clade-5_X;Dino-Group-II-Clade-5_X_sp_;
Otu01451	0.000730528	5.68889	KJ759562_1_1795_U	Eukaryota;Alveolata;Dinoflagellata;Dinophyceae;Dinophyceae_X;Dinophyceae_XX;Dinophyceae_XXX;Dinophyceae_XXX_sp_;
Otu00721	0.00504521	5.68514	JQ956268_1_1641_U	Eukaryota;Alveolata;Ciliophora;Spirotrichea;Choreotrichida;Leegaardiellidae_B;Leegaardiella;Leegaardiella_sp_;
Otu00592	0.00360698	5.67364	U52352_1_1802_U	Eukaryota;Alveolata;Dinoflagellata;Dinophyceae;Dinophyceae_X;Dinophyceae_XX;Dinophyceae_XXX;Dinophyceae_XXX_sp_;
Otu01096	0.000388093	5.66667	EU333053_1_800_U	Eukaryota;Alveolata;Dinoflagellata;Syndiniales;Dino-Group-II;Dino-Group-II-Clade-10-and-11;Dino-Group-II-Clade-10-and-11_X;Dino-Group-II-Clade-10-and-11_X_sp_;
Otu00881	0.000388093	5.66667	EU333058_1_800_U	Eukaryota;Alveolata;Dinoflagellata;Syndiniales;Dino-Group-II;Dino-Group-II-Clade-5;Dino-Group-II-Clade-5_X;Dino-Group-II-Clade-5_X_sp_;
Otu00761	0.000388093	5.66667	EF526772_1_1322_U	Eukaryota;Stramenopiles;Ochrophyta;Bacillariophyta;Bacillariophyta_X;Polar-centric-Mediophyceae;Chaetoceros;Chaetoceros_muellerii;
Otu01021	0.00159803	5.6582	FJ648512_1_1762_U	Eukaryota;Archaeplastida;Chlorophyta;Trebouxiophyceae;Trebouxiophyceae_X;Trebouxiophyceae_XX;Choricystis;Choricystis_chodatii;
Otu01874	0.000753357	5.64249	AB284575_1_1784_U	Eukaryota;Stramenopiles;Pseudofungi;Oomycota;Oomycota_X;Atkinsiellales;Atkinsiella;Atkinsiella_dubia;
Otu00304	0.0626428	5.63069	DQ388461_1_1689_U	Eukaryota;Alveolata;Dinoflagellata;Noctilucophyceae;Noctilucales;Noctilucaceae;Noctiluca;Noctiluca_scintillans;
Otu00561	0.001735	5.61868	KJ758732_1_1796_U	Eukaryota;Alveolata;Dinoflagellata;Syndiniales;Dino-Group-II;Dino-Group-II-Clade-3;Dino-Group-II-Clade-3_X;Dino-Group-II-Clade-3_X_sp_;
Otu01020	0.00214593	5.61372	KF130095_1_1759_U	Eukaryota;Alveolata;Dinoflagellata;Syndiniales;Dino-Group-II;Dino-Group-II-Clade-18;Dino-Group-II-Clade-18_X;Dino-Group-II-Clade-18_X_sp_;
Otu01383	0.0010273	5.60942	DQ504359_1_1566_U	Eukaryota;Opisthokonta;Fungi;Basidiomycota;Ustilaginomycotina;Exobasidiomycetes;Exobasidiomycetes_X;Exobasidiomycetes_X_sp_;
Otu00342	0.00276231	5.60314	AB058376_1_1718_U	Eukaryota;Archaeplastida;Chlorophyta;Mamiellophyceae;Mamiellales;Bathycoccaceae;Ostreococcus;Ostreococcus_lucimarinus;
Otu01234	0.000821844	5.58621	KJ763359_1_1795_U	Eukaryota;Alveolata;Dinoflagellata;Dinophyceae;Dinophyceae_X;Dinophyceae_XX;Dinophyceae_XXX;Dinophyceae_XXX_sp_;
Otu01336	0.000410922	5.58621	FJ405355_1_1702_U	Eukaryota;Alveolata;Dinoflagellata;Dinophyceae;Gonyaulacales;Pyrophacaceae;Fragilidium;Fragilidium_mexicanum;
Otu01080	0.000890331	5.57143	AB058358_1_1749_U	Eukaryota;Hacrobia;Haptophyta;Prymnesiophyceae;Prymnesiophyceae_X;Braarudosphaeraceae;Braarudosphaeraceae_X;Braarudosphaeraceae_X_sp_;
Otu00906	0.00155237	5.57108	KJ760349_1_1798_U	Eukaryota;Alveolata;Dinoflagellata;Syndiniales;Dino-Group-II;Dino-Group-II-Clade-1;Dino-Group-II-Clade-1_X;Dino-Group-II-Clade-1_X_sp_;
Otu01119	0.00045658	5.55556	DQ781335_1_1116_U	Eukaryota;Stramenopiles;Opalozoa;MAST-3;MAST-3J;MAST-3J_X;MAST-3J_XX;MAST-3J_XX_sp_;
Otu01864	0.00022829	5.55556	KJ759370_1_1786_U	Eukaryota;Alveolata;Dinoflagellata;Dinophyta_X;Dinophyta_XX;Dinophyta_XXX;Dinophyta_XXXX;Dinophyta_XXXX_sp_;
Otu00864	0.000433751	5.55385	KJ759426_1_1797_U	Eukaryota;Alveolata;Dinoflagellata;Dinophyceae;Gymnodiniales;Gymnodiniaceae;Gymnodinium;Gymnodinium_sp_;
Otu00926	0.000433751	5.55385	HQ026766_1_1127_U	Eukaryota;Opisthokonta;Choanoflagellida;Choanoflagellatea;Acanthoecida;Stephanoecidae_Group_H;Stephanoeca_Group_H;Stephanoeca_cauliculata;
Otu01062	0.000547896	5.53846	EF432540_1_1702_U	Eukaryota;Opisthokonta;Choanoflagellida;Choanoflagellatea;Acanthoecida;Stephanoecidae_Group_E;Stephanoecidae_Group_E_X;Stephanoecidae_Group_E_X_sp_;
Otu01290	0.000273948	5.53846	EU333069_1_800_U	Eukaryota;Stramenopiles;Ochrophyta;Chrysophyceae;Chrysophyceae_X;Chrysophyceae_Clade-G;Chrysophyceae_Clade-G_X;Chrysophyceae_Clade-G_X_sp_;
Otu01254	0.000273948	5.53846	JN832829_1_1714_U	Eukaryota;Stramenopiles;Opalozoa;MAST-3;MAST-3F;MAST-3F_X;MAST-3F_XX;MAST-3F_XX_sp_;
Otu00343	0.00180349	5.53771	JN832708_1_1770_U	Eukaryota;Alveolata;Dinoflagellata;Dinophyceae;Dinophyceae_X;Dinophyceae_XX;Dinophyceae_XXX;Dinophyceae_XXX_sp_;
Otu00748	0.00194046	5.52793	KJ763671_1_1796_U	Eukaryota;Alveolata;Dinoflagellata;Syndiniales;Dino-Group-II;Dino-Group-II-Clade-1;Dino-Group-II-Clade-1_X;Dino-Group-II-Clade-1_X_sp_;
Otu00320	0.0059812	5.52778	EU793925_1_1594_U	Eukaryota;Alveolata;Dinoflagellata;Syndiniales;Dino-Group-II;Dino-Group-II-Clade-10-and-11;Dino-Group-II-Clade-10-and-11_X;Dino-Group-II-Clade-10-and-11_X_sp_;
Otu00928	0.0100219	5.52605	KC488480_1_1694_U	Eukaryota;Alveolata;Dinoflagellata;Syndiniales;Dino-Group-II;Dino-Group-II-Clade-1;Dino-Group-II-Clade-1_X;Dino-Group-II-Clade-1_X_sp_;
Otu01540	0.0108209	5.52301	AB284572_1_1791_U	Eukaryota;Stramenopiles;Pseudofungi;Oomycota;Oomycota_X;Peronosporales;Lagenidium;Lagenidium_thermophilum;
Otu01420	0.00091316	5.51724	KJ763671_1_1796_U	Eukaryota;Alveolata;Dinoflagellata;Syndiniales;Dino-Group-II;Dino-Group-II-Clade-1;Dino-Group-II-Clade-1_X;Dino-Group-II-Clade-1_X_sp_;
Otu00646	0.00515935	5.51577	KJ925307_1_1499_U	Eukaryota;Opisthokonta;Choanoflagellida;Choanoflagellida_X;Choanoflagellida_XX;Choanoflagellida_XX_Clade-3;Choanoflagellida_XX_Clade-3_X;Choanoflagellida_XX_Clade-3_X_sp_;
Otu01263	0.00264816	5.49673	AB252770_1_1671_U	Eukaryota;Stramenopiles;Opalozoa;MAST-12;MAST-12E;MAST-12E_X;MAST-12E_XX;MAST-12E_XX_sp_;
Otu01252	0.000707699	5.49143	AY129037_1_1791_U	Eukaryota;Alveolata;Dinoflagellata;Syndiniales;Dino-Group-II;Dino-Group-II-Clade-32;Dino-Group-II-Clade-32_X;Dino-Group-II-Clade-32_X_sp_;
Otu02520	0.000342435	5.4878	JQ227301_1_1639_U	Eukaryota;Alveolata;Dinoflagellata;Dinophyceae;Dinophyceae_X;Dinophyceae_XX;Dinophyceae_XXX;Dinophyceae_XXX_sp_;
Otu01230	0.000342435	5.4878	KC582994_1_1780_U	Eukaryota;Stramenopiles;Ochrophyta;Chrysophyceae;Chrysophyceae_X;Chrysophyceae_Clade-H;Chrysophyceae_Clade-H_X;Chrysophyceae_Clade-H_X_sp_;
Otu02702	0.00100448	5.46893	HQ438143_1_1644_U	Eukaryota;Alveolata;Dinoflagellata;Syndiniales;Dino-Group-II;Dino-Group-II-Clade-23;Dino-Group-II-Clade-23_X;Dino-Group-II-Clade-23_X_sp_;
Otu02561	0.00164369	5.45684	EF219382_1_1726_U	Eukaryota;Stramenopiles;Opalozoa;MAST-12;MAST-12C;MAST-12C_X;MAST-12C_XX;MAST-12C_XX_sp_;
Otu01093	0.000388093	5.45283	HQ394116_1_811_U	Eukaryota;Alveolata;Ciliophora;CONThreeP;CONThreeP_X;CONThreeP_XX;Askenasia;Askenasia_sp_;
Otu00828	0.000388093	5.45283	HQ394137_1_785_U	Eukaryota;Alveolata;Ciliophora;Phyllopharyngea;Cyrtophoria_1;PHYLL_4;PHYLL_4_X;PHYLL_4_X_sp_;
Otu01346	0.000593554	5.45161	EU162644_1_1799_U	Eukaryota;Stramenopiles;Opalozoa;MAST-12;MAST-12C;MAST-12C_X;MAST-12C_XX;MAST-12C_XX_sp_;
Otu01091	0.000296777	5.45161	KJ762603_1_1796_U	Eukaryota;Alveolata;Dinoflagellata;Syndiniales;Dino-Group-II;Dino-Group-II-Clade-3;Dino-Group-II-Clade-3_X;Dino-Group-II-Clade-3_X_sp_;
Otu01565	0.000296777	5.45161	JQ420087_1_1780_U	Eukaryota;Alveolata;Dinoflagellata;Syndiniales;Dino-Group-II;Dino-Group-II-Clade-3;Dino-Group-II-Clade-3_X;Dino-Group-II-Clade-3_X_sp_;
Otu01061	0.000319606	5.44444	JX188350_1_1750_U	Eukaryota;Alveolata;Dinoflagellata;Syndiniales;Dino-Group-I;Dino-Group-I-Clade-5;Dino-Group-I-Clade-5_X;Dino-Group-I-Clade-5_X_sp_;
Otu02269	0.000159803	5.44444	KJ761166_1_1794_U	Eukaryota;Alveolata;Dinoflagellata;Syndiniales;Dino-Group-II;Dino-Group-II-Clade-1;Dino-Group-II-Clade-1_X;Dino-Group-II-Clade-1_X_sp_;
Otu01666	0.000159803	5.44444	JQ340337_1_1720_U	Eukaryota;Apusozoa;Hilomonadea;Planomonadida;Planomonadidae;Planomonadidae_Group-1;Ancyromonas;Ancyromonas_indica;
Otu32117	0.000159803	5.44444	MG972234_1_1704_U	Eukaryota;Stramenopiles;Ochrophyta;Bacillariophyta;Bacillariophyta_X;Polar-centric-Mediophyceae;Chaetoceros;Chaetoceros_curvisetus_2a;
Otu00871	0.000570725	5.43478	AY520445_1_1790_U	Eukaryota;Stramenopiles;Opalozoa;Bicoecea;Bicoecales;Bicoecaceae;Bicosoeca;Bicosoeca_vacillans;
Otu02549	0.00276231	5.40458	HM749950_1_1540_U	Eukaryota;Stramenopiles;Ochrophyta;Bolidophyceae;Parmales;Parmales_env_3;Parmales_env_3A;Parmales_env_3A_sp_;
Otu00536	0.0269839	5.40043	AF315604_1_1807_U	Eukaryota;Stramenopiles;Opalozoa;Bicoecea;Anoecales;Cafeteriaceae;Pseudobodo;Pseudobodo_tremulans;
Otu01528	0.000205461	5.4	KJ577847_1_1609_U	Eukaryota;Stramenopiles;Ochrophyta;Bacillariophyta;Bacillariophyta_X;Raphid-pennate;Berkeleya;Berkeleya_hyalina;
Otu23897	0.000205461	5.4	JN832789_1_994_U	Eukaryota;Stramenopiles;Pseudofungi;MAST-1;MAST-1A;MAST-1A_X;MAST-1A_XX;MAST-1A_XX_sp_;
Otu01893	0.000205461	5.4	KU843599_1_1640_U	Eukaryota;Archaeplastida;Chlorophyta;Chloropicophyceae;Chloropicales;Chloropicaceae;Chloropicon;Chlroropicon_A6_sp_;
Otu01733	0.000205461	5.4	JX413558_1_1637_U	Eukaryota;Stramenopiles;Stramenopiles_X;Stramenopiles_X-Group-7;Stramenopiles_X-Group-7_X;Stramenopiles_X-Group-7_XX;Stramenopiles_X-Group-7_XXX;Stramenopiles_X-Group-7_XXX_sp_;
Otu00431	0.0269839	5.37355	KT792924_1_1604_U	Eukaryota;Alveolata;Ciliophora;Spirotrichea;Tintinnida;Tintinnidae;Steenstrupiella;Steenstrupiella_steenstrupii;
Otu02599	0.000593554	5.36508	KJ763485_1_1798_U	Eukaryota;Alveolata;Dinoflagellata;Syndiniales;Dino-Group-II;Dino-Group-II-Clade-10-and-11;Dino-Group-II-Clade-10-and-11_X;Dino-Group-II-Clade-10-and-11_X_sp_;
Otu01775	0.00365264	5.36463	FJ537300_1_1799_U	Eukaryota;Stramenopiles;Ochrophyta;Bacillariophyta;Bacillariophyta_X;Radial-centric-basal-Coscinodiscophyceae;Radial-centric-basal-Coscinodiscophyceae_X;Radial-centric-basal-Coscinodiscophyceae_X_sp_;
Otu01104	0.00127842	5.35154	AY664958_1_1754_U	Eukaryota;Alveolata;Dinoflagellata;Dinophyceae;Dinophyceae_X;Dinophyceae_XX;Dinophyceae_XXX;Dinophyceae_XXX_sp_;
Otu01611	0.00118711	5.34387	KC488361_1_1669_U	Eukaryota;Opisthokonta;Choanoflagellida;Choanoflagellatea;Craspedida;Monosigidae_Group_B;Monosigidae_Group_B_X;Monosigidae_Group_B_X_sp_;
Otu01171	0.000525067	5.34343	KJ762603_1_1796_U	Eukaryota;Alveolata;Dinoflagellata;Syndiniales;Dino-Group-II;Dino-Group-II-Clade-3;Dino-Group-II-Clade-3_X;Dino-Group-II-Clade-3_X_sp_;
Otu01173	0.00182632	5.34224	AB191414_1_1708_U	Eukaryota;Alveolata;Dinoflagellata;Dinophyceae;Dinophyceae_X;Dinophyceae_XX;Dinophyceae_XXX;Dinophyceae_XXX_sp_;
Otu29876	0.000182632	5.33333	JQ244217_1_576_U	Eukaryota;Stramenopiles;Sagenista;Labyrinthulomycetes;Amphitremida;Amphitraemidae;Amphitrema;Amphitrema_sp_;
Otu00872	0.000365264	5.33333	EF058253_1_1725_U	Eukaryota;Alveolata;Dinoflagellata;Dinophyceae;Suessiales;Borghiellaceae;Borghiella;Borghiella_tenuissima;
Otu01871	0.000182632	5.33333	AY129049_1_1796_U	Eukaryota;Alveolata;Dinoflagellata;Syndiniales;Dino-Group-II;Dino-Group-II-Clade-16;Dino-Group-II-Clade-16_X;Dino-Group-II-Clade-16_X_sp_;
Otu01769	0.000182632	5.33333	MG972215_1_1745_U	Eukaryota;Stramenopiles;Ochrophyta;Bacillariophyta;Bacillariophyta_X;Polar-centric-Mediophyceae;Chaetoceros;Chaetoceros_brevis_2;
Otu36601	0.000182632	5.33333	KC582992_1_1792_U	Eukaryota;Stramenopiles;Opalozoa;MAST-3;MAST-3L;MAST-3L_X;MAST-3L_XX;MAST-3L_XX_sp_;
Otu01753	0.000182632	5.33333	AF363186_1_1797_U	Eukaryota;Stramenopiles;Pseudofungi;MAST-2;MAST-2B;MAST-2B_X;MAST-2B_XX;MAST-2B_XX_sp_;
Otu02007	0.0124646	5.31685	KF130347_1_1751_U	Eukaryota;Alveolata;Dinoflagellata;Syndiniales;Dino-Group-I;Dino-Group-I-Clade-5;Dino-Group-I-Clade-5_X;Dino-Group-I-Clade-5_X_sp_;
Otu00949	0.000479409	5.31325	KJ762603_1_1796_U	Eukaryota;Alveolata;Dinoflagellata;Syndiniales;Dino-Group-II;Dino-Group-II-Clade-3;Dino-Group-II-Clade-3_X;Dino-Group-II-Clade-3_X_sp_;
Otu00741	0.00180349	5.2845	AB013555_1_1782_U	Eukaryota;Opisthokonta;Fungi;Ascomycota;Saccharomycotina;Saccharomycetales;Candida;Candida_zeylanoides;
Otu01345	0.000730528	5.27835	KJ758310_1_1802_U	Eukaryota;Alveolata;Dinoflagellata;Syndiniales;Dino-Group-II;Dino-Group-II-Clade-5;Dino-Group-II-Clade-5_X;Dino-Group-II-Clade-5_X_sp_;
Otu00823	0.000867502	5.27007	AY665082_1_1749_U	Eukaryota;Hacrobia;Katablepharidophyta;Katablepharidaceae;Katablepharidales;Katablepharidales_X;Katablepharidales_XX;Katablepharidales_XX_sp_;
Otu00381	0.0127842	5.26758	FN552048_872_1_U	Eukaryota;Alveolata;Dinoflagellata;Dinophyceae;Suessiales;Symbiodiniaceae;Symbiodinium;Symbiodinium_sp_;
Otu01542	0.00100448	5.26087	LM653283_1_1635_U	Eukaryota;Stramenopiles;Sagenista;Labyrinthulomycetes;Labyrinthulida;Labyrinthulaceae;Labyrinthulaceae_ANT10_3;Labyrinthulaceae_ANT10_3_sp_;
Otu01278	0.000251119	5.26087	EU333101_1_800_U	Eukaryota;Alveolata;Ciliophora;Spirotrichea;Tintinnida;Eutintinnidae;Eutintinnidae_X;Eutintinnidae_X_sp_;
Otu00575	0.000251119	5.26087	KC582887_1_1798_U	Eukaryota;Alveolata;Dinoflagellata;Syndiniales;Dino-Group-II;Dino-Group-II-Clade-22;Dino-Group-II-Clade-22_X;Dino-Group-II-Clade-22_X_sp_;
Otu01157	0.000251119	5.26087	KF130163_1_1755_U	Eukaryota;Stramenopiles;Sagenista;MAST-7;MAST-7D;MAST-7D_X;MAST-7D_XX;MAST-7D_XX_sp_;
Otu26768	0.00146106	5.22449	AB275040_1_1676_U	Eukaryota;Stramenopiles;Opalozoa;MAST-12;MAST-12B;MAST-12B_X;MAST-12B_XX;MAST-12B_XX_sp_;
Otu00722	0.00132408	5.20743	DQ393786_1_1728_U	Eukaryota;Alveolata;Ciliophora;Spirotrichea;Choreotrichida;Strombidinopsidae;Parastrombidinopsis;Parastrombidinopsis_minima;
Otu00987	0.00091316	5.19481	AM981206_1_1797_U	Eukaryota;Archaeplastida;Chlorophyta;Chlorophyceae;Chlamydomonadales;Coccomyxaceae;Coccomyxa;Coccomyxa_sp_;
Otu02451	0.000616383	5.17021	FJ405355_1_1702_U	Eukaryota;Alveolata;Dinoflagellata;Dinophyceae;Gonyaulacales;Pyrophacaceae;Fragilidium;Fragilidium_mexicanum;
Otu01123	0.000616383	5.17021	KJ763489_1_1801_U	Eukaryota;Alveolata;Dinoflagellata;Syndiniales;Dino-Group-II;Dino-Group-II-Clade-1;Dino-Group-II-Clade-1_X;Dino-Group-II-Clade-1_X_sp_;
Otu01393	0.00210027	5.16728	EU793223_1_1642_U	Eukaryota;Alveolata;Dinoflagellata;Syndiniales;Dino-Group-I;Dino-Group-I-Clade-5;Dino-Group-I-Clade-5_X;Dino-Group-I-Clade-5_X_sp_;
Otu00947	0.000844673	5.16604	AB807623_1_1624_U	Eukaryota;Archaeplastida;Chlorophyta;Ulvophyceae;Cladophorales;Cladophorales_X;Chaetomorpha;Chaetomorpha_sp_;
Otu00212	0.0657932	5.16177	KJ757092_1_1782_U	Eukaryota;Opisthokonta;Choanoflagellida;Choanoflagellatea;Acanthoecida;Stephanoecidae_Group_I;Stephanoecidae_Group_I_X;Stephanoecidae_Group_I_X_sp_;
Otu02021	0.000753357	5.16114	EU143506_1_906_U	Eukaryota;Archaeplastida;Chlorophyta;Prasino-Clade-VIII;Prasino-Clade-VIII_X;Prasino-Clade-VIII_XX;Prasino-Clade-VIII_XXX;Prasino-Clade-VIII_XXX_sp_;
Otu01023	0.000319606	5.15789	EU333099_1_800_U	Eukaryota;Alveolata;Dinoflagellata;Syndiniales;Dino-Group-II;Dino-Group-II-Clade-10-and-11;Dino-Group-II-Clade-10-and-11_X;Dino-Group-II-Clade-10-and-11_X_sp_;
Otu01266	0.000319606	5.15789	KC582992_1_1792_U	Eukaryota;Stramenopiles;Opalozoa;MAST-3;MAST-3L;MAST-3L_X;MAST-3L_XX;MAST-3L_XX_sp_;
Otu02707	0.000867502	5.15714	KJ763295_1_1800_U	Eukaryota;Alveolata;Dinoflagellata;Dinophyceae;Gonyaulacales;Ceratiaceae;Tripos;Tripos_fusus;
Otu01292	0.00168935	5.14662	JX391010_1_1651_U	Eukaryota;Archaeplastida;Chlorophyta;Trebouxiophyceae;Microthamniales;Microthamniales_X;Microthamniales_XX;Microthamniales_XX_sp_;
Otu02504	0.000273948	5.14286	EU780591_1_1638_U	Eukaryota;Alveolata;Dinoflagellata;Syndiniales;Dino-Group-II;Dino-Group-II-Clade-7;Dino-Group-II-Clade-7_X;Dino-Group-II-Clade-7_X_sp_;
Otu00487	0.00474843	5.13458	KJ762979_1_1783_U	Eukaryota;Opisthokonta;Choanoflagellida;Choanoflagellatea;Acanthoecida;Acanthoecida_X;Acanthoecida_XX;Acanthoecida_XX_sp_;
Otu01388	0.00203178	5.12686	DQ103859_1_1780_U	Eukaryota;Alveolata;Dinoflagellata;Dinophyceae;Dinophyceae_X;Dinophyceae_XX;Dinophyceae_XXX;Dinophyceae_XXX_sp_;
Otu02618	0.00125559	5.11844	JF730808_1_1668_U	Eukaryota;Stramenopiles;Ochrophyta;Chrysophyceae;Chrysophyceae_X;Chrysophyceae_XX;Chrysophyceae_XXX;Chrysophyceae_XXX_sp_;
Otu00340	0.0038581	5.11571	KJ757929_1_1800_U	Eukaryota;Alveolata;Dinoflagellata;Syndiniales;Dino-Group-II;Dino-Group-II-Clade-10-and-11;Dino-Group-II-Clade-10-and-11_X;Dino-Group-II-Clade-10-and-11_X_sp_;
Otu01268	0.000753357	5.11268	KC911784_1_811_U	Eukaryota;Alveolata;Ciliophora;Spirotrichea;Choreotrichida;Strobilidiidae_A;Rimostrombidium_A;Rimostrombidium_A_sp_;
Otu00727	0.0249749	5.11136	AB023070_1_1784_U	Eukaryota;Stramenopiles;Ochrophyta;Chrysophyceae;Chrysophyceae_X;Chrysophyceae_Clade-C;Poterioochromonas;Poterioochromonas_sp_;
Otu00791	0.00305909	5.09535	EU793692_1_1683_U	Eukaryota;Alveolata;Dinoflagellata;Syndiniales;Dino-Group-II;Dino-Group-II-Clade-38;Dino-Group-II-Clade-38_X;Dino-Group-II-Clade-38_X_sp_;
Otu01602	0.000433751	5.08451	AY485478_1_1690_U	Eukaryota;Stramenopiles;Ochrophyta;Bacillariophyta;Bacillariophyta_X;Polar-centric-Mediophyceae;Minutocellus;Minutocellus_polymorphus;
Otu00902	0.00152954	5.08381	JF714228_1_1777_U	Eukaryota;Hacrobia;Haptophyta;Pavlovophyceae;Pavlovales;Pavlovaceae;Exanthemachrysis;Exanthemachrysis_sp_;
Otu36345	0.000388093	5.07018	AY823716_1_1717_U	Eukaryota;Archaeplastida;Glaucophyta;Glaucocystophyceae;Glaucocystophytes;Cyanophoraceae;Cyanophora;Cyanophora_paradoxa;
Otu01683	0.000388093	5.07018	AF363186_1_1797_U	Eukaryota;Stramenopiles;Pseudofungi;MAST-2;MAST-2B;MAST-2B_X;MAST-2B_XX;MAST-2B_XX_sp_;
Otu00571	0.0516848	5.06953	KF130608_1_1727_U	Eukaryota;Alveolata;Ciliophora;CONTH_6;CONTH_6_X;CONTH_6_XX;CONTH_6_XXX;CONTH_6_XXX_sp_;
Otu01243	0.00109579	5.05263	KJ763357_1_1803_U	Eukaryota;Alveolata;Dinoflagellata;Syndiniales;Dino-Group-II;Dino-Group-II-Clade-3;Dino-Group-II-Clade-3_X;Dino-Group-II-Clade-3_X_sp_;
Otu01977	0.000981647	5.03815	EU011928_1_1772_U	Eukaryota;Opisthokonta;Choanoflagellida;Choanoflagellatea;Acanthoecida;Acanthoecidae_Group_G;Savillea;Savillea_micropora;
Otu00801	0.000525067	5.0381	KC488497_1_1676_U	Eukaryota;Alveolata;Dinoflagellata;Syndiniales;Dino-Group-I;Dino-Group-I-Clade-1;Dino-Group-I-Clade-1_X;Dino-Group-I-Clade-1_X_sp_;
Otu00861	0.00164369	5.03301	KJ577857_1_1649_U	Eukaryota;Stramenopiles;Ochrophyta;Bacillariophyta;Bacillariophyta_X;Radial-centric-basal-Coscinodiscophyceae;Guinardia;Guinardia_striata;
Otu01270	0.0014154	5.03141	KJ762978_1_1792_U	Eukaryota;Alveolata;Dinoflagellata;Syndiniales;Dino-Group-II;Dino-Group-II_X;Dino-Group-II_XX;Dino-Group-II_XX_sp_;
Otu01170	0.000707699	5.03141	KJ361986_1_1669_U	Eukaryota;Alveolata;Dinoflagellata;Dinophyceae;Gonyaulacales;Goniodomataceae;Alexandrium;Alexandrium_ostenfeldii;
Otu01028	0.0014154	5.03141	KF130179_1_1757_U	Eukaryota;Alveolata;Dinoflagellata;Syndiniales;Dino-Group-II;Dino-Group-II-Clade-3;Dino-Group-II-Clade-3_X;Dino-Group-II-Clade-3_X_sp_;
Otu00749	0.0199297	5.02853	AB727654_1_1766_U	Eukaryota;Alveolata;Dinoflagellata;Dinophyceae;Gonyaulacales;Protoceratiaceae;Protoceratium;Protoceratium_reticulatum;
Otu03516	0.000639212	5.02564	AY180046_1_1684_U	Eukaryota;Alveolata;Ciliophora;Spirotrichea;Tintinnida;Eutintinnidae;Eutintinnus;Eutintinnus_sp_;
Otu01544	0.000844673	5.01465	HE610120_1_1772_U	Eukaryota;Archaeplastida;Chlorophyta;Ulvophyceae;Oltmansiellopsidales;Oltmansiellopsidales_X;Oltmannsiellopsis;Oltmannsiellopsis_sp_;
Otu00999	0.000867502	5.01389	EU143419_1_903_U	Eukaryota;Archaeplastida;Chlorophyta;Pyramimonadophyceae;Pyramimonadales;Halosphaeraceae;Halosphaera;Halosphaera_sp_;
Otu01337	0.00022829	5	KJ758772_1_1803_U	Eukaryota;Alveolata;Dinoflagellata;Dinophyceae;Dinophyceae_X;Dinophyceae_XX;Dinophyceae_XXX;Dinophyceae_XXX_sp_;
Otu01723	0.00022829	5	JQ420087_1_1780_U	Eukaryota;Alveolata;Dinoflagellata;Syndiniales;Dino-Group-II;Dino-Group-II-Clade-3;Dino-Group-II-Clade-3_X;Dino-Group-II-Clade-3_X_sp_;
Otu01319	0.00022829	5	GQ365840_1_1539_U	Eukaryota;Hacrobia;Telonemia;Telonemia_X;Telonemia_XX;Telonemia-Group-2;Telonemia-Group-2_X;Telonemia-Group-2_X_sp_;
Otu02478	0.00022829	5	KF129839_1_1764_U	Eukaryota;Stramenopiles;Opalozoa;MAST-12;MAST-12D;MAST-12D_X;MAST-12D_XX;MAST-12D_XX_sp_;
Otu02465	0.00022829	5	AB284574_1_1789_U	Eukaryota;Stramenopiles;Pseudofungi;Oomycota;Oomycota_X;Haliphthorales;Halodaphnea;Halodaphnea_panulirata;
Otu01032	0.00127842	4.99363	KJ763379_1_1799_U	Eukaryota;Alveolata;Dinoflagellata;Syndiniales;Dino-Group-II;Dino-Group-II-Clade-22;Dino-Group-II-Clade-22_X;Dino-Group-II-Clade-22_X_sp_;
Otu00286	0.063282	4.96575	KC582953_1_1788_U	Eukaryota;Alveolata;Dinoflagellata;Syndiniales;Dino-Group-II;Dino-Group-II-Clade-22;Dino-Group-II-Clade-22_X;Dino-Group-II-Clade-22_X_sp_;
Otu00982	0.000547896	4.96552	FN690341_1_830_U	Eukaryota;Alveolata;Dinoflagellata;Syndiniales;Dino-Group-II;Dino-Group-II-Clade-28;Dino-Group-II-Clade-28_X;Dino-Group-II-Clade-28_X_sp_;
Otu00436	0.0440143	4.95251	EU446372_1_1566_U	Eukaryota;Alveolata;Dinoflagellata;Dinophyceae;Dinophyceae_X;Dinophyceae_XX;Dinophyceae_XXX;Dinophyceae_XXX_sp_;
Otu01707	0.000433751	4.94521	GU479651_1_1549_U	Eukaryota;Alveolata;Apicomplexa;Coccidiomorphea;Eimeriida;Eimeriidae;Goussia5;Goussia5_pannonica;
Otu01517	0.00198612	4.94383	KT792926_1_1641_U	Eukaryota;Alveolata;Ciliophora;Spirotrichea;Tintinnida;Eutintinnidae;Eutintinnus;Eutintinnus_perminutus;
Otu01729	0.00814995	4.94008	KJ757849_1_1798_U	Eukaryota;Stramenopiles;Ochrophyta;Bolidophyceae;Parmales;Parmales_env_3;Parmales_env_3_X;Parmales_env_3_X_sp_;
Otu00165	0.112205	4.93158	AB191431_1_1719_U	Eukaryota;Opisthokonta;Fungi;Cryptomycota;Cryptomycotina;Cryptomycotina_X;Cryptomycotina_XX;Cryptomycotina_XX_sp_;
Otu01522	0.00155237	4.92964	AB038129_1_1776_U	Eukaryota;Opisthokonta;Fungi;Basidiomycota;Pucciniomycotina;Cystobasidiomycetes;Rhodotorula;Rhodotorula_bacarum;
Otu01428	0.000365264	4.92308	AF509625_1_1681_U	Eukaryota;Archaeplastida;Chlorophyta;Mamiellophyceae;Dolichomastigales;Dolichomastigaceae;Dolichomastix;Dolichomastix_tenuilepis;
Otu01498	0.00109579	4.92308	KJ760035_1_1801_U	Eukaryota;Alveolata;Dinoflagellata;Syndiniales;Dino-Group-II;Dino-Group-II-Clade-7;Dino-Group-II-Clade-7_X;Dino-Group-II-Clade-7_X_sp_;
Otu01479	0.000593554	4.89855	EU793417_1_1444_U	Eukaryota;Alveolata;Dinoflagellata;Syndiniales;Dino-Group-II;Dino-Group-II-Clade-6;Dino-Group-II-Clade-6_X;Dino-Group-II-Clade-6_X_sp_;
Otu01466	0.00497672	4.89837	JX188328_1_1756_U	Eukaryota;Alveolata;Dinoflagellata;Syndiniales;Dino-Group-II;Dino-Group-II-Clade-23;Dino-Group-II-Clade-23_X;Dino-Group-II-Clade-23_X_sp_;
Otu01938	0.000388093	4.89831	FN598238_1_1138_U	Eukaryota;Alveolata;Dinoflagellata;Dinophyceae;Dinophyceae_X;Dinophyceae_XX;Dinophyceae_XXX;Dinophyceae_XXX_sp_;
Otu01261	0.000547896	4.88136	KJ763214_1_1797_U	Eukaryota;Alveolata;Dinoflagellata;Syndiniales;Dino-Group-II;Dino-Group-II-Clade-26;Dino-Group-II-Clade-26_X;Dino-Group-II-Clade-26_X_sp_;
Otu01167	0.00397225	4.86752	KJ763423_1_1799_U	Eukaryota;Alveolata;Dinoflagellata;Dinophyceae;Dinophyceae_X;Dinophyceae_XX;Dinophyceae_XXX;Dinophyceae_XXX_sp_;
Otu00531	0.00271665	4.85798	HQ343199_1_993_U	Eukaryota;Stramenopiles;Pseudofungi;Oomycota;Oomycota_X;Peronosporales;Lagenidium;Lagenidium_sp_;
Otu00556	0.235207	4.84311	KJ759720_1_1802_U	Eukaryota;Alveolata;Dinoflagellata;Dinophyceae;Dinophyceae_X;Dinophyceae_XX;Dinophyceae_XXX;Dinophyceae_XXX_sp_;
Otu01197	0.000251119	4.84	KJ763473_1_1800_U	Eukaryota;Alveolata;Dinoflagellata;Syndiniales;Dino-Group-II;Dino-Group-II-Clade-1;Dino-Group-II-Clade-1_X;Dino-Group-II-Clade-1_X_sp_;
Otu01039	0.000251119	4.84	KJ758310_1_1802_U	Eukaryota;Alveolata;Dinoflagellata;Syndiniales;Dino-Group-II;Dino-Group-II-Clade-5;Dino-Group-II-Clade-5_X;Dino-Group-II-Clade-5_X_sp_;
Otu01008	0.000251119	4.84	KJ760688_1_1793_U	Eukaryota;Stramenopiles;Ochrophyta;Bacillariophyta;Bacillariophyta_X;Raphid-pennate;Raphid-pennate_X;Raphid-pennate_X_sp_;
Otu01224	0.000639212	4.83951	AY425309_1_1728_U	Eukaryota;Archaeplastida;Chlorophyta;Mamiellophyceae;Mamiellales;Bathycoccaceae;Ostreococcus;Ostreococcus_lucimarinus;
Otu02305	0.000890331	4.82857	AF372762_1_1583_U	Eukaryota;Stramenopiles;Pseudofungi;Oomycota;Oomycota_X;Haliphthorales;Haliphthorales_X;Haliphthorales_X_sp_;
Otu01339	0.000296777	4.82857	EU793767_1_1483_U	Eukaryota;Alveolata;Dinoflagellata;Syndiniales;Dino-Group-II;Dino-Group-II-Clade-7;Dino-Group-II-Clade-7_X;Dino-Group-II-Clade-7_X_sp_;
Otu01636	0.000616383	4.82781	KF031641_1_1747_U	Eukaryota;Archaeplastida;Chlorophyta;Prasino-Clade-9;Prasino-Clade-9_X;Prasino-Clade-9_XX;Prasino-Clade-9_XXX;Prasino-Clade-9_XXX_sp_;
Otu18044	0.0214364	4.82466	FR874327_1_1747_U	Eukaryota;Alveolata;Ciliophora;Cyclotrichium_like_organism;Cyclotrichium_like_organism_X;Cyclotrichium_like_organism_XX;Cyclotrichium;Cyclotrichium_sp_;
Otu01628	0.000433751	4.81333	FJ410691_1_800_U	Eukaryota;Stramenopiles;Pseudofungi;Oomycota;Oomycota_X;Oomycota_XX;Oomycota_XXX;Oomycota_XXX_sp_;
Otu01143	0.0021231	4.81302	AB686255_1_1713_U	Eukaryota;Alveolata;Dinoflagellata;Dinophyceae;Gymnodiniales;Gymnodiniaceae;Lepidodinium;Lepidodinium_sp_;
Otu02030	0.00118711	4.81139	DQ057347_1_1728_U	Eukaryota;Alveolata;Ciliophora;Phyllopharyngea;Cyrtophoria_8;Dysteriidae;Dysteria_1;Dysteria_1_sp_;
Otu01905	0.000273948	4.8	KJ760404_1_1796_U	Eukaryota;Alveolata;Dinoflagellata;Syndiniales;Dino-Group-II;Dino-Group-II-Clade-17;Dino-Group-II-Clade-17_X;Dino-Group-II-Clade-17_X_sp_;
Otu01960	0.000273948	4.8	EF172830_1_1667_U	Eukaryota;Alveolata;Dinoflagellata;Syndiniales;Dino-Group-I;Dino-Group-I-Clade-3;Ichthyodinium;Ichthyodinium_sp_;
Otu01066	0.000273948	4.8	EU143436_1_890_U	Eukaryota;Archaeplastida;Chlorophyta;Mamiellophyceae;Mamiellales;Mamiellaceae;Mantoniella;Mantoniella_squamata;
Otu01098	0.000273948	4.8	KC814811_1_1731_U	Eukaryota;Stramenopiles;Ochrophyta;Bacillariophyta;Bacillariophyta_X;Radial-centric-basal-Coscinodiscophyceae;Leptocylindrus;Leptocylindrus_convexus;
Otu00962	0.00321889	4.7987	KJ761278_1_1800_U	Eukaryota;Alveolata;Dinoflagellata;Syndiniales;Dino-Group-II;Dino-Group-II_X;Dino-Group-II_XX;Dino-Group-II_XX_sp_;
Otu02662	0.0010273	4.78723	EF526803_1_1334_U	Eukaryota;Opisthokonta;Choanoflagellida;Choanoflagellatea;Acanthoecida;Stephanoecidae_Group_D;Stephanoecidae_Group_D_X;Stephanoecidae_Group_D_X_sp_;
Otu01251	0.000342435	4.78723	AY485514_1_1745_U	Eukaryota;Stramenopiles;Ochrophyta;Bacillariophyta;Bacillariophyta_X;Raphid-pennate;Pleurosigma;Pleurosigma_planktonicum;
Otu01474	0.0219158	4.78629	KF130405_1_1756_U	Eukaryota;Alveolata;Dinoflagellata;Syndiniales;Dino-Group-II;Dino-Group-II-Clade-2;Dino-Group-II-Clade-2_X;Dino-Group-II-Clade-2_X_sp_;
Otu01561	0.000730528	4.78505	EF100227_1_1509_U	Eukaryota;Alveolata;Apicomplexa;Gregarinomorphea;Eugregarinorida;Urosporidae;Difficilina;Difficilina_sp_;
Otu00472	0.0990322	4.77267	KJ762979_1_1783_U	Eukaryota;Opisthokonta;Choanoflagellida;Choanoflagellatea;Acanthoecida;Acanthoecida_X;Acanthoecida_XX;Acanthoecida_XX_sp_;
Otu00518	0.107479	4.76894	JN832892_1_1013_U	Eukaryota;Opisthokonta;Mesomycetozoa;Ichthyosporea;Ichthyosphonida;Abeoformidae_Group_MAIP_2;Abeoformidae_Group_MAIP_2_X;Abeoformidae_Group_MAIP_2_X_sp_;
Otu01928	0.000205461	4.76471	HQ446967_1_1794_U	Eukaryota;Alveolata;Dinoflagellata;Syndiniales;Dino-Group-II;Dino-Group-II_X;Dino-Group-II_XX;Dino-Group-II_XX_sp_;
Otu01982	0.000616383	4.76471	AB847414_1_1764_U	Eukaryota;Stramenopiles;Ochrophyta;Bacillariophyta;Bacillariophyta_X;Polar-centric-Mediophyceae;Chaetoceros;Chaetoceros_lorenzianus;
Otu01424	0.000410922	4.76471	FR865481_2_1682_U	Eukaryota;Stramenopiles;Ochrophyta;Bacillariophyta;Bacillariophyta_X;Raphid-pennate;Amphora;Amphora_coffeaeformis;
Otu01489	0.000205461	4.76471	AM491021_1_1787_U	Eukaryota;Hacrobia;Haptophyta;Prymnesiophyceae;Prymnesiales;Chrysochromulinaceae;Chrysochromulina;Chrysochromulina_simplex;
Otu01412	0.00045658	4.7619	KC488458_1_1677_U	Eukaryota;Alveolata;Dinoflagellata;Syndiniales;Dino-Group-I;Dino-Group-I-Clade-4;Dino-Group-I-Clade-4_X;Dino-Group-I-Clade-4_X_sp_;
Otu01100	0.00045658	4.7619	EU780626_1_1690_U	Eukaryota;Alveolata;Dinoflagellata;Syndiniales;Dino-Group-II;Dino-Group-II-Clade-26;Dino-Group-II-Clade-26_X;Dino-Group-II-Clade-26_X_sp_;
Otu00471	0.0150443	4.74619	FN690736_1_1668_U	Eukaryota;Alveolata;Ciliophora;Spirotrichea;Strombidiida;Strombidiidae_M;Strombidium_M;Strombidium_M_sp_;
Otu02338	0.000479409	4.74194	JN832902_1_1035_U	Eukaryota;Opisthokonta;Choanoflagellida;Choanoflagellatea;Choanoflagellatea_X;Choanoflagellatea_XX;Choanoflagellatea_XXX;Choanoflagellatea_XXX_sp_;
Otu01118	0.000479409	4.74194	HQ912666_1_1667_U	Eukaryota;Stramenopiles;Ochrophyta;Bacillariophyta;Bacillariophyta_X;Polar-centric-Mediophyceae;Cerataulus;Cerataulus_smithii;
Otu00775	0.0335358	4.74136	JQ781892_1_1799_U	Eukaryota;Stramenopiles;Pseudofungi;Oomycota;Oomycota_X;Oomycota_XX;Oomycota_XXX;Oomycota_XXX_sp_;
Otu00834	0.000730528	4.74074	AY664925_1_1753_U	Eukaryota;Alveolata;Dinoflagellata;Dinophyceae;Dinophyceae_X;Dinophyceae_XX;Dinophyceae_XXX;Dinophyceae_XXX_sp_;
Otu00891	0.000365264	4.74074	KJ758639_1_1806_U	Eukaryota;Alveolata;Dinoflagellata;Syndiniales;Dino-Group-II;Dino-Group-II-Clade-7;Dino-Group-II-Clade-7_X;Dino-Group-II-Clade-7_X_sp_;
Otu01711	0.00068487	4.73684	JN832757_1_943_U	Eukaryota;Alveolata;Dinoflagellata;Dinophyceae;Dinophyceae_X;Dinophyceae_XX;Dinophyceae_XXX;Dinophyceae_XXX_sp_;
Otu01240	0.000707699	4.73399	AY664921_1_1754_U	Eukaryota;Alveolata;Dinoflagellata;Dinophyceae;Prorocentrales;Prorocentraceae;Prorocentrum;Prorocentrum_sp_;
Otu00388	0.00618666	4.72867	KC911750_1_833_U	Eukaryota;Hacrobia;Haptophyta;Prymnesiophyceae;Prymnesiales;Chrysochromulinaceae;Chrysochromulina;Chrysochromulina_sp_;
Otu00910	0.000616383	4.70323	AB058347_1_1756_U	Eukaryota;Hacrobia;Haptophyta;Prymnesiophyceae;Coccolithales;Hymenomonadaceae;Ochrosphaera;Ochrosphaera_sp_;
Otu01457	0.000799015	4.69349	AB693196_1_1730_U	Eukaryota;Alveolata;Dinoflagellata;Dinophyceae;Gonyaulacales;Gonyaulacaceae;Lingulodinium;Lingulodinium_polyedra;
Otu01281	0.00155237	4.68016	EU333101_1_800_U	Eukaryota;Alveolata;Ciliophora;Spirotrichea;Tintinnida;Eutintinnidae;Eutintinnidae_X;Eutintinnidae_X_sp_;
Otu00818	0.0031504	4.67912	DQ103863_1_1790_U	Eukaryota;Alveolata;Dinoflagellata;Dinophyceae;Dinophyceae_X;Dinophyceae_XX;Dinophyceae_XXX;Dinophyceae_XXX_sp_;
Otu01087	0.00107296	4.65053	KR263893_1_1748_U	Eukaryota;Alveolata;Ciliophora;Spirotrichea;Choreotrichida;Strombidinopsidae;Strombidinopsis;Strombidinopsis_sinicum;
Otu01121	0.000662041	4.64641	KC488430_1_1661_U	Eukaryota;Alveolata;Dinoflagellata;Syndiniales;Dino-Group-I;Dino-Group-I-Clade-5;Dino-Group-I-Clade-5_X;Dino-Group-I-Clade-5_X_sp_;
Otu01808	0.000547896	4.64516	FN598437_1_1817_U	Eukaryota;Alveolata;Dinoflagellata;Syndiniales;Dino-Group-II;Dino-Group-II-Clade-9;Dino-Group-II-Clade-9_X;Dino-Group-II-Clade-9_X_sp_;
Otu00978	0.0130125	4.64368	DQ103799_1_1448_U	Eukaryota;Stramenopiles;Opalozoa;Bicoecea;Bicoecales;Bicoecaceae;Bicoecaceae_X;Bicoecaceae_X_sp_;
Otu01496	0.000479409	4.64211	KF129651_1_1759_U	Eukaryota;Alveolata;Dinoflagellata;Syndiniales;Dino-Group-II;Dino-Group-II-Clade-16;Dino-Group-II-Clade-16_X;Dino-Group-II-Clade-16_X_sp_;
Otu00685	0.000479409	4.64211	EU793273_1_1569_U	Eukaryota;Alveolata;Dinoflagellata;Syndiniales;Dino-Group-II;Dino-Group-II-Clade-10-and-11;Dino-Group-II-Clade-10-and-11_X;Dino-Group-II-Clade-10-and-11_X_sp_;
Otu01464	0.00118711	4.63014	AJ968729_1_1806_U	Eukaryota;Alveolata;Dinoflagellata;Dinophyceae;Peridiniales;Thoracosphaeraceae;Paulsenella;Paulsenella_vonstoschii;
Otu01160	0.00107296	4.61169	EU793274_1_1572_U	Eukaryota;Alveolata;Dinoflagellata;Syndiniales;Dino-Group-II;Dino-Group-II-Clade-1;Dino-Group-II-Clade-1_X;Dino-Group-II-Clade-1_X_sp_;
Otu01108	0.000935989	4.60548	DQ060524_1_1778_U	Eukaryota;Hacrobia;Picozoa;Picozoa_X;Picozoa_XX;Picozoa_XXX;Picozoa_XXXX;Picozoa_XXXX_sp_;
Otu00570	0.010547	4.60108	KJ762979_1_1783_U	Eukaryota;Opisthokonta;Choanoflagellida;Choanoflagellatea;Acanthoecida;Acanthoecida_X;Acanthoecida_XX;Acanthoecida_XX_sp_;
Otu02350	0.0142681	4.59889	JN832892_1_1013_U	Eukaryota;Opisthokonta;Mesomycetozoa;Ichthyosporea;Ichthyosphonida;Abeoformidae_Group_MAIP_2;Abeoformidae_Group_MAIP_2_X;Abeoformidae_Group_MAIP_2_X_sp_;
Otu01328	0.00130125	4.59547	FR874662_1_1788_U	Eukaryota;Stramenopiles;Ochrophyta;Chrysophyceae;Chrysophyceae_X;Chrysophyceae_Clade-F;Chrysophyceae_Clade-F_X;Chrysophyceae_Clade-F_X_sp_;
Otu01250	0.000388093	4.5873	KF129680_1_1771_U	Eukaryota;Stramenopiles;Opalozoa;MAST-3;MAST-3A;MAST-3A_X;MAST-3A_XX;MAST-3A_XX_sp_;
Otu02341	0.000616383	4.58491	EF173017_1_1674_U	Eukaryota;Alveolata;Dinoflagellata;Syndiniales;Dino-Group-II;Dino-Group-II-Clade-6;Dino-Group-II-Clade-6_X;Dino-Group-II-Clade-6_X_sp_;
Otu01937	0.00232856	4.58326	DQ103795_1_1696_U	Eukaryota;Stramenopiles;Opalozoa;Bicoecea;Bicoecales;Bicoecaceae;Bicoecaceae_X;Bicoecaceae_X_sp_;
Otu00539	0.00607251	4.58324	KC582893_1_1795_U	Eukaryota;Alveolata;Dinoflagellata;Syndiniales;Dino-Group-II;Dino-Group-II-Clade-22;Dino-Group-II-Clade-22_X;Dino-Group-II-Clade-22_X_sp_;
Otu01549	0.000182632	4.57143	KJ763986_1_1822_U	Eukaryota;Alveolata;Dinoflagellata;Dinophyceae;Dinophyceae_X;Dinophyceae_XX;Dinophyceae_XXX;Dinophyceae_XXX_sp_;
Otu01499	0.000182632	4.57143	KJ763439_1_1796_U	Eukaryota;Alveolata;Dinoflagellata;Syndiniales;Dino-Group-II;Dino-Group-II-Clade-1;Dino-Group-II-Clade-1_X;Dino-Group-II-Clade-1_X_sp_;
Otu02728	0.000182632	4.57143	EU333058_1_800_U	Eukaryota;Alveolata;Dinoflagellata;Syndiniales;Dino-Group-II;Dino-Group-II-Clade-5;Dino-Group-II-Clade-5_X;Dino-Group-II-Clade-5_X_sp_;
Otu01532	0.000182632	4.57143	KJ759387_1_1799_U	Eukaryota;Alveolata;Dinoflagellata;Syndiniales;Dino-Group-III;Dino-Group-III_X;Dino-Group-III_XX;Dino-Group-III_XX_sp_;
Otu01702	0.000182632	4.57143	AB430610_1_1722_U	Eukaryota;Stramenopiles;Ochrophyta;Bacillariophyta;Bacillariophyta_X;Araphid-pennate;Tabularia;Tabularia_laevis;
Otu01948	0.000182632	4.57143	HQ394099_1_841_U	Eukaryota;Stramenopiles;Ochrophyta;Bacillariophyta;Bacillariophyta_X;Radial-centric-basal-Coscinodiscophyceae;Leptocylindrus;Leptocylindrus_sp_;
Otu01563	0.000182632	4.57143	FN690660_1_1692_U	Eukaryota;Stramenopiles;Ochrophyta;Chrysophyceae;Chrysophyceae_X;Chrysophyceae_Clade-F;Chrysophyceae_Clade-F_X;Chrysophyceae_Clade-F_X_sp_;
Otu01597	0.000182632	4.57143	AF363187_1_1785_U	Eukaryota;Stramenopiles;Opalozoa;MAST-3;MAST-3J;MAST-3J_X;MAST-3J_XX;MAST-3J_XX_sp_;
Otu01202	0.000182632	4.57143	AF372760_1_1674_U	Eukaryota;Stramenopiles;Pseudofungi;MAST-1;MAST-1C;MAST-1C_X;MAST-1C_XX;MAST-1C_XX_sp_;
Otu01035	0.000433751	4.56962	KJ481803_1_1793_U	Eukaryota;Alveolata;Dinoflagellata;Dinophyceae;Peridiniales;Amphidomataceae;Azadinium;Azadinium_trinitatum;
Otu01520	0.00207744	4.56757	AY485449_1_1770_U	Eukaryota;Stramenopiles;Ochrophyta;Bacillariophyta;Bacillariophyta_X;Polar-centric-Mediophyceae;Chaetoceros;Chaetoceros_pumilum;
Otu01149	0.000296777	4.56757	EF527109_1_1755_U	Eukaryota;Alveolata;Dinoflagellata;Dinophyceae;Gonyaulacales;Ceratiaceae;Ceratium;Ceratium_sp_;
Otu02198	0.000296777	4.56757	KJ763927_1_1794_U	Eukaryota;Alveolata;Dinoflagellata;Syndiniales;Dino-Group-II;Dino-Group-II-Clade-1;Dino-Group-II-Clade-1_X;Dino-Group-II-Clade-1_X_sp_;
Otu01298	0.000296777	4.56757	KJ758732_1_1796_U	Eukaryota;Alveolata;Dinoflagellata;Syndiniales;Dino-Group-II;Dino-Group-II-Clade-3;Dino-Group-II-Clade-3_X;Dino-Group-II-Clade-3_X_sp_;
Otu01181	0.000296777	4.56757	AY425318_1_1734_U	Eukaryota;Archaeplastida;Chlorophyta;Mamiellophyceae;Mamiellales;Mamiellaceae;Micromonas;Micromonas_clade_B4;
Otu00128	0.0698567	4.56333	KM217384_1_1728_U	Eukaryota;Alveolata;Dinoflagellata;Dinophyceae;Peridiniales;Kryptoperidiniaceae;Unruhdinium;Unruhdinium_jiulongensis;
Otu01763	0.000570725	4.56204	AY345013_1_1742_U	Eukaryota;Stramenopiles;Ochrophyta;Bacillariophyta;Bacillariophyta_X;Araphid-pennate;Araphid-pennate_X;Araphid-pennate_X_sp_;
Otu01740	0.0040179	4.55395	FN690356_1_1658_U	Eukaryota;Alveolata;Ciliophora;CONThreeP;CONThreeP_X;CONThreeP_XX;CONThreeP_XXX;CONThreeP_XXX_sp_;
Otu01175	0.00045658	4.54545	AM418563_1_1798_U	Eukaryota;Hacrobia;Telonemia;Telonemia_X;Telonemia_XX;Telonemia-Group-2;Telonemia-Group-2_X;Telonemia-Group-2_X_sp_;
Otu01984	0.00022829	4.54545	KJ760593_1_1797_U	Eukaryota;Alveolata;Dinoflagellata;Dinophyceae;Dinophyceae_X;Dinophyceae_XX;Dinophyceae_XXX;Dinophyceae_XXX_sp_;
Otu01075	0.00022829	4.54545	JQ223262_1_1636_U	Eukaryota;Stramenopiles;Pseudofungi;MAST-1;MAST-1C;MAST-1C_X;MAST-1C_XX;MAST-1C_XX_sp_;
Otu01941	0.00230573	4.54388	JQ179859_1_1656_U	Eukaryota;Alveolata;Dinoflagellata;Dinophyceae;Gymnodiniales;Gymnodiniaceae;Ankistrodinium;Ankistrodinium_semilunatum;
Otu00732	0.0338326	4.53069	KJ761297_1_1788_U	Eukaryota;Alveolata;Dinoflagellata;Syndiniales;Dino-Group-I;Dino-Group-I-Clade-3;Dino-Group-I-Clade-3_X;Dino-Group-I-Clade-3_X_sp_;
Otu00914	0.00114145	4.52899	EU793925_1_1594_U	Eukaryota;Alveolata;Dinoflagellata;Syndiniales;Dino-Group-II;Dino-Group-II-Clade-10-and-11;Dino-Group-II-Clade-10-and-11_X;Dino-Group-II-Clade-10-and-11_X_sp_;
Otu00991	0.000525067	4.52137	HQ896315_1_1736_U	Eukaryota;Alveolata;Dinoflagellata;Dinophyceae;Gymnodiniales;Gymnodiniaceae;Margalefidinium;Margalefidinium_fulvescens;
Otu01086	0.00625515	4.50907	FJ422985_1_1761_U	Eukaryota;Alveolata;Ciliophora;Spirotrichea;Tintinnida;TIN_07;Tintinnopsis_07;Tintinnopsis_07_sp_;
Otu00831	0.000410922	4.5	KF129788_1_1760_U	Eukaryota;Alveolata;Dinoflagellata;Syndiniales;Dino-Group-II;Dino-Group-II-Clade-12;Dino-Group-II-Clade-12_X;Dino-Group-II-Clade-12_X_sp_;
Otu01188	0.000273948	4.5	FJ422993_1_1778_U	Eukaryota;Alveolata;Ciliophora;Spirotrichea;Strombidiida;Tontoniidae_B;Pseudotontonia;Pseudotontonia_simplicidens;
Otu01213	0.000273948	4.5	AF274267_1_1752_U	Eukaryota;Alveolata;Dinoflagellata;Dinophyceae;Peridiniales;Heterocapsaceae;Heterocapsa;Heterocapsa_rotundata;
Otu01305	0.000273948	4.5	AY251288_1_1746_U	Eukaryota;Alveolata;Dinoflagellata;Dinophyceae;Peridiniales;Thoracosphaeraceae;Thoracosphaeraceae_X;Thoracosphaeraceae_X_sp_;
Otu01432	0.000273948	4.5	AF107088_1_1797_U	Eukaryota;Hacrobia;Haptophyta;Prymnesiophyceae;Prymnesiophyceae_Clade_E;Prymnesiophyceae_Clade_E_X;Prymnesiophyceae_Clade_E_XX;Prymnesiophyceae_Clade_E_XX_sp_;
Otu00790	0.000273948	4.5	KC488336_1_1682_U	Eukaryota;Hacrobia;Picozoa;Picozoa_X;Picozoa_XX;Picozoa_XXX;Picozoa_XXXX;Picozoa_XXXX_sp_;
Otu01218	0.000273948	4.5	KC814811_1_1731_U	Eukaryota;Stramenopiles;Ochrophyta;Bacillariophyta;Bacillariophyta_X;Radial-centric-basal-Coscinodiscophyceae;Leptocylindrus;Leptocylindrus_convexus;
Otu02385	0.000136974	4.5	KJ759731_1_1795_U	Eukaryota;Alveolata;Dinoflagellata;Syndiniales;Dino-Group-II;Dino-Group-II-Clade-3;Dino-Group-II-Clade-3_X;Dino-Group-II-Clade-3_X_sp_;
Otu01815	0.000136974	4.5	EU793924_1_918_U	Eukaryota;Alveolata;Dinoflagellata;Syndiniales;Dino-Group-II;Dino-Group-II-Clade-4;Dino-Group-II-Clade-4_X;Dino-Group-II-Clade-4_X_sp_;
Otu33397	0.00200895	4.48667	AY143569_1_1684_U	Eukaryota;Alveolata;Ciliophora;Spirotrichea;Tintinnida;Eutintinnidae;Eutintinnus;Eutintinnus_sp_;
Otu02213	0.000251119	4.48148	KJ761067_1_1800_U	Eukaryota;Alveolata;Dinoflagellata;Dinophyceae;Dinophyceae_X;Dinophyceae_XX;Dinophyceae_XXX;Dinophyceae_XXX_sp_;
Otu01256	0.000251119	4.48148	KF130258_1_1759_U	Eukaryota;Alveolata;Dinoflagellata;Dinophyceae;Prorocentrales;Prorocentraceae;Prorocentrum;Prorocentrum_sp_;
Otu00920	0.000251119	4.48148	JN832735_1_1695_U	Eukaryota;Alveolata;Dinoflagellata;Syndiniales;Dino-Group-II;Dino-Group-II-Clade-26;Dino-Group-II-Clade-26_X;Dino-Group-II-Clade-26_X_sp_;
Otu01309	0.000251119	4.48148	GQ365815_1_1537_U	Eukaryota;Hacrobia;Telonemia;Telonemia_X;Telonemia_XX;Telonemia-Group-1;Telonemia-Group-1_X;Telonemia-Group-1_X_sp_;
Otu01812	0.000251119	4.48148	GQ995327_1_1774_U	Eukaryota;Opisthokonta;Fungi;Chytridiomycota;Chytridiomycotina;Chytridiomycetes;Spizellomycetales-and-Rhizophlyctidales;Spizellomycetales-and-Rhizophlyctidales_sp_;
Otu01044	0.00107296	4.48073	DQ103795_1_1696_U	Eukaryota;Stramenopiles;Opalozoa;Bicoecea;Bicoecales;Bicoecaceae;Bicoecaceae_X;Bicoecaceae_X_sp_;
Otu00524	0.00429185	4.457	AY789790_1_1185_U	Eukaryota;Stramenopiles;Opalozoa;Bicoecea;Bicoecales;Bicoecaceae;Bicoecaceae_X;Bicoecaceae_X_sp_;
Otu01036	0.00196329	4.45542	AF274256_1_1754_U	Eukaryota;Alveolata;Dinoflagellata;Dinophyceae;Gymnodiniales;Gymnodiniaceae;Ankistrodinium;Ankistrodinium_semilunatum;
Otu02015	0.000159803	4.45455	JQ179859_1_1656_U	Eukaryota;Alveolata;Dinoflagellata;Dinophyceae;Gymnodiniales;Gymnodiniaceae;Ankistrodinium;Ankistrodinium_semilunatum;
Otu20640	0.000159803	4.45455	KC762294_1_1070_U	Eukaryota;Opisthokonta;Fungi;Chytridiomycota;Chytridiomycotina;Chytridiomycetes;Batrachochytrium;Batrachochytrium_salamandrivorans;
Otu24994	0.000319606	4.45455	AB505512_1_1637_U	Eukaryota;Alveolata;Ciliophora;CONTH_3;CONTH_3_X;CONTH_3_XX;CONTH_3_XXX;CONTH_3_XXX_sp_;
Otu24142	0.000159803	4.45455	KJ873049_1_1696_U	Eukaryota;Alveolata;Ciliophora;Colpodea;Colpodea_X;Jaroschiidae;Jaroschia;Jaroschia_sumptuosa;
Otu02679	0.000159803	4.45455	KC582954_1_1787_U	Eukaryota;Alveolata;Dinoflagellata;Syndiniales;Dino-Group-II;Dino-Group-II-Clade-39;Dino-Group-II-Clade-39_X;Dino-Group-II-Clade-39_X_sp_;
Otu02177	0.000159803	4.45455	JQ340332_1_1769_U	Eukaryota;Apusozoa;Hilomonadea;Planomonadida;Planomonadidae;Planomonadidae_Group-1;Planomonas;Planomonas_elongata;
Otu01800	0.000159803	4.45455	AJ243061_1_1729_U	Eukaryota;Stramenopiles;Ochrophyta;Bacillariophyta;Bacillariophyta_X;Raphid-pennate;Amphora;Amphora_montana;
Otu01867	0.000159803	4.45455	EF173010_1_1664_U	Eukaryota;Stramenopiles;Pseudofungi;MAST-1;MAST-1D;MAST-1D_X;MAST-1D_XX;MAST-1D_XX_sp_;
Otu01724	0.000159803	4.45455	JX413558_1_1637_U	Eukaryota;Stramenopiles;Stramenopiles_X;Stramenopiles_X-Group-7;Stramenopiles_X-Group-7_X;Stramenopiles_X-Group-7_XX;Stramenopiles_X-Group-7_XXX;Stramenopiles_X-Group-7_XXX_sp_;
Otu01618	0.000593554	4.44737	EU792932_1_914_U	Eukaryota;Alveolata;Dinoflagellata;Syndiniales;Dino-Group-II;Dino-Group-II-Clade-19;Dino-Group-II-Clade-19_X;Dino-Group-II-Clade-19_X_sp_;
Otu00946	0.000388093	4.44615	EF527109_1_1755_U	Eukaryota;Alveolata;Dinoflagellata;Dinophyceae;Gonyaulacales;Ceratiaceae;Ceratium;Ceratium_sp_;
Otu00652	0.0157063	4.43663	KJ763175_1_1759_U	Eukaryota;Alveolata;Ciliophora;Spirotrichea;Choreotrichida;Strobilidiidae_I;Pelagostrobilidium;Pelagostrobilidium_sp_;
Otu01329	0.000616383	4.41818	AB072228_1_1781_U	Eukaryota;Opisthokonta;Fungi;Basidiomycota;Agaricomycotina;Agaricomycetes;Itersonilia;Itersonilia_perplexans;
Otu01473	0.000342435	4.41176	AJ968729_1_1806_U	Eukaryota;Alveolata;Dinoflagellata;Dinophyceae;Peridiniales;Thoracosphaeraceae;Paulsenella;Paulsenella_vonstoschii;
Otu00793	0.000935989	4.38903	JQ340335_1_1776_U	Eukaryota;Apusozoa;Hilomonadea;Planomonadida;Planomonadidae;Planomonadidae_Group-1;Fabomonas;Fabomonas_tropica;
Otu01063	0.000753357	4.37349	JN615412_1_1457_U	Eukaryota;Alveolata;Dinoflagellata;Dinophyceae;Peridiniales;Amphidomataceae;Amphidoma;Amphidoma_languida;
Otu00774	0.00134691	4.3567	EF172882_1_1681_U	Eukaryota;Alveolata;Dinoflagellata;Syndiniales;Dino-Group-II;Dino-Group-II-Clade-6;Dino-Group-II-Clade-6_X;Dino-Group-II-Clade-6_X_sp_;
Otu02196	0.000296777	4.33333	KJ763525_1_1749_U	Eukaryota;Alveolata;Ciliophora;Nassophorea;Nassophorea_X;Discotrichidae;NASSO_1;NASSO_1_sp_;
Otu02043	0.000296777	4.33333	AY664952_1_1755_U	Eukaryota;Alveolata;Dinoflagellata;Dinophyceae;Dinophyceae_X;Dinophyceae_XX;Dinophyceae_XXX;Dinophyceae_XXX_sp_;
Otu01789	0.000296777	4.33333	HM581709_1_1797_U	Eukaryota;Alveolata;Dinoflagellata;Syndiniales;Dino-Group-II;Dino-Group-II_X;Dino-Group-II_XX;Dino-Group-II_XX_sp_;
Otu21156	0.000296777	4.33333	KJ762561_1_1798_U	Eukaryota;Alveolata;Dinoflagellata;Syndiniales;Dino-Group-II;Dino-Group-II-Clade-1;Dino-Group-II-Clade-1_X;Dino-Group-II-Clade-1_X_sp_;
Otu01652	0.00171217	4.3236	KF129788_1_1760_U	Eukaryota;Alveolata;Dinoflagellata;Syndiniales;Dino-Group-II;Dino-Group-II-Clade-12;Dino-Group-II-Clade-12_X;Dino-Group-II-Clade-12_X_sp_;
Otu00796	0.000867502	4.29762	KJ757823_1_1799_U	Eukaryota;Alveolata;Dinoflagellata;Dinophyceae;Dinophyceae_X;Dinophyceae_XX;Dinophyceae_XXX;Dinophyceae_XXX_sp_;
Otu01300	0.00308191	4.29329	HQ393985_1_819_U	Eukaryota;Alveolata;Dinoflagellata;Dinophyceae;Dinophyceae_X;Dinophyceae_XX;Dinophyceae_XXX;Dinophyceae_XXX_sp_;
Otu01460	0.000365264	4.26667	AB120002_1_1725_U	Eukaryota;Alveolata;Dinoflagellata;Dinophyceae;Gymnodiniales;Gymnodiniaceae;Gyrodinium;Gyrodinium_spirale;
Otu01413	0.000205461	4.26316	FN690162_1_1686_U	Eukaryota;Alveolata;Dinoflagellata;Dinophyceae;Suessiales;Suessiaceae;Suessiaceae_X;Suessiaceae_X_sp_;
Otu02752	0.000205461	4.26316	JX401228_1_1775_U	Eukaryota;Stramenopiles;Ochrophyta;Bacillariophyta;Bacillariophyta_X;Polar-centric-Mediophyceae;Biddulphia;Biddulphia_tridens;
Otu02712	0.000205461	4.26316	EU333083_1_800_U	Eukaryota;Alveolata;Dinoflagellata;Syndiniales;Dino-Group-II;Dino-Group-II-Clade-14;Dino-Group-II-Clade-14_X;Dino-Group-II-Clade-14_X_sp_;
Otu01436	0.000205461	4.26316	AY129040_1_1796_U	Eukaryota;Alveolata;Dinoflagellata;Syndiniales;Dino-Group-II;Dino-Group-II-Clade-2;Dino-Group-II-Clade-2_X;Dino-Group-II-Clade-2_X_sp_;
Otu02480	0.000205461	4.26316	KJ757160_1_1796_U	Eukaryota;Alveolata;Dinoflagellata;Syndiniales;Dino-Group-II;Dino-Group-II-Clade-21;Dino-Group-II-Clade-21_X;Dino-Group-II-Clade-21_X_sp_;
Otu02349	0.000205461	4.26316	KT861017_1_1637_U	Eukaryota;Stramenopiles;Ochrophyta;Bacillariophyta;Bacillariophyta_X;Raphid-pennate;Pleurosigma;Pleurosigma_sp_;
Otu13874	0.000205461	4.26316	AF109324_1_1676_U	Eukaryota;Stramenopiles;Ochrophyta;Chrysophyceae;Chrysophyceae_X;Chrysophyceae_Clade-F;Paraphysomonas;Paraphysomonas_imperforata;
Otu01357	0.000205461	4.26316	EU333069_1_800_U	Eukaryota;Stramenopiles;Ochrophyta;Chrysophyceae;Chrysophyceae_X;Chrysophyceae_Clade-G;Chrysophyceae_Clade-G_X;Chrysophyceae_Clade-G_X_sp_;
Otu01191	0.000205461	4.26316	JQ782001_1_1776_U	Eukaryota;Stramenopiles;Pseudofungi;MAST-1;MAST-1B;MAST-1B_X;MAST-1B_XX;MAST-1B_XX_sp_;
Otu01352	0.000319606	4.26087	AY216905_1_1804_U	Eukaryota;Stramenopiles;Ochrophyta;Bacillariophyta;Bacillariophyta_X;Araphid-pennate;Talaroneis;Talaroneis_posidoniae;
Otu01376	0.00269382	4.2581	EU091856_1_1346_U	Eukaryota;Archaeplastida;Chlorophyta;Trebouxiophyceae;Microthamniales;Microthamniales_X;Microthamniales_XX;Microthamniales_XX_sp_;
Otu00988	0.00045658	4.25532	AY129036_1_1794_U	Eukaryota;Alveolata;Dinoflagellata;Syndiniales;Dino-Group-II;Dino-Group-II-Clade-32;Dino-Group-II-Clade-32_X;Dino-Group-II-Clade-32_X_sp_;
Otu01935	0.00159803	4.25347	AY460574_1_1751_U	Eukaryota;Alveolata;Dinoflagellata;Dinophyceae;Gonyaulacales;Ceratiaceae;Ceratium;Ceratium_sp_;
Otu02239	0.000433751	4.24706	KJ763471_1_1796_U	Eukaryota;Alveolata;Dinoflagellata;Syndiniales;Dino-Group-II;Dino-Group-II-Clade-1;Dino-Group-II-Clade-1_X;Dino-Group-II-Clade-1_X_sp_;
Otu01503	0.000342435	4.24528	FJ217814_1_1521_U	Eukaryota;Alveolata;Dinoflagellata;Dinophyceae;Peridiniales;Amphidomataceae;Azadinium;Azadinium_spinosum;
Otu01347	0.000342435	4.24528	AJ402338_1_1758_U	Eukaryota;Alveolata;Dinoflagellata;Syndiniales;Dino-Group-II;Dino-Group-II-Clade-1;Dino-Group-II-Clade-1_X;Dino-Group-II-Clade-1_X_sp_;
Otu02012	0.00143823	4.23586	KJ759739_1_1799_U	Eukaryota;Alveolata;Dinoflagellata;Syndiniales;Dino-Group-II;Dino-Group-II-Clade-5;Dino-Group-II-Clade-5_X;Dino-Group-II-Clade-5_X_sp_;
Otu00719	0.000273948	4.23529	EU793789_1_1508_U	Eukaryota;Alveolata;Dinoflagellata;Syndiniales;Dino-Group-II;Dino-Group-II-Clade-16;Dino-Group-II-Clade-16_X;Dino-Group-II-Clade-16_X_sp_;
Otu01445	0.000273948	4.23529	JF714225_1_1791_U	Eukaryota;Hacrobia;Haptophyta;Pavlovophyceae;Pavlovales;Pavlovaceae;Exanthemachrysis;Exanthemachrysis_sp_;
Otu01495	0.000273948	4.23529	KJ757092_1_1782_U	Eukaryota;Opisthokonta;Choanoflagellida;Choanoflagellatea;Acanthoecida;Stephanoecidae_Group_I;Stephanoecidae_Group_I_X;Stephanoecidae_Group_I_X_sp_;
Otu01311	0.000273948	4.23529	AB183642_1_1722_U	Eukaryota;Stramenopiles;Ochrophyta;Bacillariophyta;Bacillariophyta_X;Raphid-pennate;Raphid-pennate_X;Raphid-pennate_X_sp_;
Otu00367	0.0070085	4.2304	AY664964_1_1755_U	Eukaryota;Alveolata;Dinoflagellata;Dinophyceae;Dinophyceae_X;Dinophyceae_XX;Dinophyceae_XXX;Dinophyceae_XXX_sp_;
Otu01056	0.00216875	4.20746	GU355681_1_1600_U	Eukaryota;Alveolata;Dinoflagellata;Noctilucophyceae;Noctilucales;Kofoidiniaceae;Kofoidinium;Kofoidinium_sp_;
Otu01089	0.00068487	4.20561	AY665001_1_1752_U	Eukaryota;Alveolata;Dinoflagellata;Syndiniales;Dino-Group-II;Dino-Group-II-Clade-1;Dino-Group-II-Clade-1_X;Dino-Group-II-Clade-1_X_sp_;
Otu01591	0.000479409	4.2	JF747220_1_1722_U	Eukaryota;Alveolata;Ciliophora;Colpodea;Colpodea_X;Platyophryida;Woodruffides;Woodruffides_metabolicus;
Otu01369	0.000570725	4.19463	EU793684_1_1573_U	Eukaryota;Alveolata;Dinoflagellata;Syndiniales;Dino-Group-II;Dino-Group-II-Clade-1;Dino-Group-II-Clade-1_X;Dino-Group-II-Clade-1_X_sp_;
Otu01896	0.000388093	4.18841	KJ763580_1_1800_U	Eukaryota;Alveolata;Dinoflagellata;Syndiniales;Dino-Group-II;Dino-Group-II-Clade-10-and-11;Dino-Group-II-Clade-10-and-11_X;Dino-Group-II-Clade-10-and-11_X_sp_;
Otu01112	0.000388093	4.18841	JQ956276_1_1687_U	Eukaryota;Hacrobia;Haptophyta;Prymnesiophyceae;Prymnesiales;Prymnesiophyceae_Clade_B3;Prymnesiophyceae_Clade_B3_X;Prymnesiophyceae_Clade_B3_X_sp_;
Otu01774	0.000251119	4.17241	FN689844_1_829_U	Eukaryota;Hacrobia;Cryptophyta;Cryptophyceae;Cryptomonadales;Cryptomonadales_X;Cryptomonadales_XX;Cryptomonadales_XX_sp_;
Otu01857	0.00045658	4.16667	KC582938_1_1795_U	Eukaryota;Alveolata;Dinoflagellata;Syndiniales;Dino-Group-II;Dino-Group-II-Clade-22;Dino-Group-II-Clade-22_X;Dino-Group-II-Clade-22_X_sp_;
Otu01952	0.00022829	4.16667	AY520445_1_1790_U	Eukaryota;Stramenopiles;Opalozoa;Bicoecea;Bicoecales;Bicoecaceae;Bicosoeca;Bicosoeca_vacillans;
Otu00857	0.00257968	4.15793	KJ762885_1_1759_U	Eukaryota;Alveolata;Ciliophora;Spirotrichea;Strombidiida;Strombidiidae_J;Strombidiidae_J_X;Strombidiidae_J_X_sp_;
Otu00822	0.000844673	4.13595	FR874781_1_1790_U	Eukaryota;Alveolata;Dinoflagellata;Syndiniales;Dino-Group-I;Dino-Group-I-Clade-1;Dino-Group-I-Clade-1_X;Dino-Group-I-Clade-1_X_sp_;
Otu01756	0.000365264	4.12903	AY642736_1_1348_U	Eukaryota;Alveolata;Dinoflagellata;Dinophyceae;Dinophyceae_X;Dinophyceae_XX;Dinophyceae_XXX;Dinophyceae_XXX_sp_;
Otu01384	0.000365264	4.12903	KF129839_1_1764_U	Eukaryota;Stramenopiles;Opalozoa;MAST-12;MAST-12D;MAST-12D_X;MAST-12D_XX;MAST-12D_XX_sp_;
Otu00836	0.00205461	4.12844	FN690037_1_1680_U	Eukaryota;Alveolata;Ciliophora;Spirotrichea;Strombidiida;Strombidiidae;Strombidiidae_X;Strombidiidae_X_sp_;
Otu00859	0.000296777	4.12195	AF274262_1_1755_U	Eukaryota;Alveolata;Dinoflagellata;Dinophyceae;Gymnodiniales;Kareniaceae;Karlodinium;Karlodinium_veneficum;
Otu01614	0.000776186	4.09929	GQ253350_1_1342_U	Eukaryota;Opisthokonta;Fungi;Ascomycota;Pezizomycotina;Dothideomycetes;Paraphaeosphaeria;Paraphaeosphaeria_sp_;
Otu01880	0.000730528	4.096	KJ763671_1_1796_U	Eukaryota;Alveolata;Dinoflagellata;Syndiniales;Dino-Group-II;Dino-Group-II-Clade-1;Dino-Group-II-Clade-1_X;Dino-Group-II-Clade-1_X_sp_;
Otu01016	0.00276231	4.09309	AY129550_1_1480_U	Eukaryota;Stramenopiles;Pseudofungi;Oomycota;Oomycota_X;Oomycota_XX;Oomycota_XXX;Oomycota_XXX_sp_;
Otu00042	1.69871	4.09164	AY664896_1_1755_U	Eukaryota;Alveolata;Dinoflagellata;Dinophyceae;Dinophyceae_X;Dinophyceae_XX;Dinophyceae_XXX;Dinophyceae_XXX_sp_;
Otu02009	0.000342435	4.09091	AB871544_1_1671_U	Eukaryota;Alveolata;Dinoflagellata;Dinophyceae;Peridiniales;Crypthecodiniaceae;Crypthecodinium;Crypthecodinium_sp_;
Otu02085	0.00538764	4.09048	EF527098_1_1326_U	Eukaryota;Alveolata;Ciliophora;Spirotrichea;Strombidiida_B;Strombidiida_B_X;Strombidiida_B_XX;Strombidiida_B_XX_sp_;
Otu02105	0.000319606	4.08333	AY664948_1_1754_U	Eukaryota;Alveolata;Dinoflagellata;Dinophyceae;Dinophyceae_X;Dinophyceae_XX;Dinophyceae_XXX;Dinophyceae_XXX_sp_;
Otu19896	0.000319606	4.08333	AJ535382_1_1778_U	Eukaryota;Alveolata;Dinoflagellata;Dinophyceae;Gonyaulacales;Goniodomataceae;Alexandrium;Alexandrium_ostenfeldii;
Otu01944	0.00045658	4.08163	EU446370_1_1564_U	Eukaryota;Alveolata;Dinoflagellata;Dinophyceae;Dinophyceae_X;Dinophyceae_XX;Dinophyceae_XXX;Dinophyceae_XXX_sp_;
Otu00777	0.000753357	4.07865	KJ762979_1_1783_U	Eukaryota;Opisthokonta;Choanoflagellida;Choanoflagellatea;Acanthoecida;Acanthoecida_X;Acanthoecida_XX;Acanthoecida_XX_sp_;
Otu01186	0.00477126	4.0713	KJ762571_1_1799_U	Eukaryota;Alveolata;Dinoflagellata;Dinophyceae;Dinophyceae_X;Dinophyceae_XX;Dinophyceae_XXX;Dinophyceae_XXX_sp_;
Otu01244	0.000388093	4.07042	KF130517_1_1752_U	Eukaryota;Alveolata;Dinoflagellata;Syndiniales;Dino-Group-II;Dino-Group-II-Clade-32;Dino-Group-II-Clade-32_X;Dino-Group-II-Clade-32_X_sp_;
Otu02095	0.000958818	4.06452	FN598275_1_1136_U	Eukaryota;Alveolata;Dinoflagellata;Syndiniales;Dino-Group-II;Dino-Group-II-Clade-1;Dino-Group-II-Clade-1_X;Dino-Group-II-Clade-1_X_sp_;
Otu00716	0.000547896	4.05634	KJ758222_1_1798_U	Eukaryota;Alveolata;Dinoflagellata;Dinophyceae;Dinophyceae_X;Dinophyceae_XX;Dinophyceae_XXX;Dinophyceae_XXX_sp_;
Otu01040	0.0051137	4.03863	AY665026_1_1755_U	Eukaryota;Alveolata;Dinoflagellata;Dinophyceae;Dinophyceae_X;Dinophyceae_XX;Dinophyceae_XXX;Dinophyceae_XXX_sp_;
Otu00366	0.0109351	4.02112	AY642698_1_1745_U	Eukaryota;Alveolata;Ciliophora;CONThreeP;CONThreeP_X;CONThreeP_XX;Askenasia;Askenasia_sp_;
Otu01196	0.000799015	4.01639	KJ763579_1_1795_U	Eukaryota;Alveolata;Dinoflagellata;Syndiniales;Dino-Group-II;Dino-Group-II-Clade-3;Dino-Group-II-Clade-3_X;Dino-Group-II-Clade-3_X_sp_;
Otu02650	0.00198612	4.00264	KJ759734_1_1800_U	Eukaryota;Alveolata;Dinoflagellata;Dinophyceae;Dinophyceae_X;Dinophyceae_XX;Dinophyceae_XXX;Dinophyceae_XXX_sp_;
Otu00676	0.0367547	4.00157	KJ763198_1_1800_U	Eukaryota;Alveolata;Dinoflagellata;Dinophyceae;Dinophyceae_X;Dinophyceae_XX;Dinophyceae_XXX;Dinophyceae_XXX_sp_;
Otu12766	9.1316e-05	4	KJ757712_1_1793_U	Eukaryota;Opisthokonta;Metazoa;Cnidaria;Cnidaria_X;Hydrozoa;Hydrozoa_X;Hydrozoa_X_sp_;
Otu01858	0.000365264	4	KJ759854_1_1798_U	Eukaryota;Alveolata;Dinoflagellata;Syndiniales;Dino-Group-III;Dino-Group-III_X;Dino-Group-III_XX;Dino-Group-III_XX_sp_;
Otu01302	0.000182632	4	KJ925494_1_1502_U	Eukaryota;Alveolata;Dinoflagellata;Dinophyceae;Dinophyceae_X;Dinophyceae_XX;Dinophyceae_XXX;Dinophyceae_XXX_sp_;
Otu02634	0.000182632	4	JQ956275_1_1697_U	Eukaryota;Alveolata;Dinoflagellata;Syndiniales;Dino-Group-II;Dino-Group-II-Clade-1;Dino-Group-II-Clade-1_X;Dino-Group-II-Clade-1_X_sp_;
Otu01301	0.000182632	4	KJ763938_1_1797_U	Eukaryota;Alveolata;Dinoflagellata;Syndiniales;Dino-Group-II;Dino-Group-II-Clade-8;Dino-Group-II-Clade-8_X;Dino-Group-II-Clade-8_X_sp_;
Otu01138	0.000182632	4	AF388373_1_1771_U	Eukaryota;Archaeplastida;Chlorophyta;Chlorophyceae;Sphaeropleales;Sphaeropleales_X;Coelastrum;Coelastrum_microporum;
Otu01368	0.000182632	4	AM491021_1_1787_U	Eukaryota;Hacrobia;Haptophyta;Prymnesiophyceae;Prymnesiales;Chrysochromulinaceae;Chrysochromulina;Chrysochromulina_simplex;
Otu01515	0.000182632	4	KC488457_1_1664_U	Eukaryota;Hacrobia;Haptophyta;Prymnesiophyceae;Prymnesiales;Chrysochromulinaceae;Chrysochromulina;Chrysochromulina_sp_;
Otu01551	0.000182632	4	AY426845_1_1789_U	Eukaryota;Opisthokonta;Choanoflagellida;Choanoflagellatea;Acanthoecida;Stephanoecidae_Group_E;Stephanoecidae_Group_E_X;Stephanoecidae_Group_E_X_sp_;
Otu01957	0.000182632	4	AY116221_1_1791_U	Eukaryota;Stramenopiles;Opalozoa;MAST-3;MAST-3J;MAST-3J_X;MAST-3J_XX;MAST-3J_XX_sp_;
Otu02226	9.1316e-05	4	AJ402338_1_1758_U	Eukaryota;Alveolata;Dinoflagellata;Syndiniales;Dino-Group-II;Dino-Group-II-Clade-1;Dino-Group-II-Clade-1_X;Dino-Group-II-Clade-1_X_sp_;
Otu02562	9.1316e-05	4	EU793930_1_1664_U	Eukaryota;Alveolata;Dinoflagellata;Syndiniales;Dino-Group-II;Dino-Group-II-Clade-10-and-11;Dino-Group-II-Clade-10-and-11_X;Dino-Group-II-Clade-10-and-11_X_sp_;
Otu02100	9.1316e-05	4	AF525879_1_1775_U	Eukaryota;Archaeplastida;Chlorophyta;Mamiellophyceae;Mamiellales;Bathycoccaceae;Bathycoccus;Bathycoccus_prasinos;
Otu31250	9.1316e-05	4	AY426845_1_1789_U	Eukaryota;Opisthokonta;Choanoflagellida;Choanoflagellatea;Acanthoecida;Stephanoecidae_Group_E;Stephanoecidae_Group_E_X;Stephanoecidae_Group_E_X_sp_;
Otu00604	0.0795134	3.99286	EF023549_1_1768_U	Eukaryota;Alveolata;Ciliophora;Colpodea;Colpodea_X;Colpodida;Colpodida_X;Colpodida_X_sp_;
Otu27044	0.004406	3.99282	KF534571_1_528_U	Eukaryota;Alveolata;Ciliophora;Phyllopharyngea;Cyrtophoria_1;PHYLL_4;PHYLL_4_X;PHYLL_4_X_sp_;
Otu01286	0.000433751	3.96703	JN832892_1_1013_U	Eukaryota;Opisthokonta;Mesomycetozoa;Ichthyosporea;Ichthyosphonida;Abeoformidae_Group_MAIP_2;Abeoformidae_Group_MAIP_2_X;Abeoformidae_Group_MAIP_2_X_sp_;
Otu00967	0.000342435	3.94737	EF526772_1_1322_U	Eukaryota;Stramenopiles;Ochrophyta;Bacillariophyta;Bacillariophyta_X;Polar-centric-Mediophyceae;Chaetoceros;Chaetoceros_muellerii;
Otu01257	0.00235139	3.93072	KJ759932_1_1799_U	Eukaryota;Alveolata;Dinoflagellata;Dinophyceae;Dinophyceae_X;Dinophyceae_XX;Dinophyceae_XXX;Dinophyceae_XXX_sp_;
Otu01579	0.000296777	3.93023	AB275037_1_1702_U	Eukaryota;Stramenopiles;Pseudofungi;MAST-1;MAST-1C;MAST-1C_X;MAST-1C_XX;MAST-1C_XX_sp_;
Otu01407	0.00196329	3.92986	FN690043_1_1654_U	Eukaryota;Alveolata;Ciliophora;CONThreeP;CONThreeP_X;CONThreeP_XX;Askenasia;Askenasia_sp_;
Otu02378	0.00045658	3.92157	LK934662_1_1754_U	Eukaryota;Alveolata;Dinoflagellata;Dinophyceae;Peridiniales;Thoracosphaeraceae;Aduncodinium;Aduncodinium_glandula;
Otu01340	0.00045658	3.92157	AY251288_1_1746_U	Eukaryota;Alveolata;Dinoflagellata;Dinophyceae;Peridiniales;Thoracosphaeraceae;Thoracosphaeraceae_X;Thoracosphaeraceae_X_sp_;
Otu38948	0.000799015	3.91374	JF791047_1_1777_U	Eukaryota;Stramenopiles;Ochrophyta;Bacillariophyta;Bacillariophyta_X;Araphid-pennate;Talaroneis;Talaroneis_posidoniae;
Otu01860	0.00130125	3.90975	EU793710_1_1576_U	Eukaryota;Alveolata;Dinoflagellata;Syndiniales;Dino-Group-II;Dino-Group-II-Clade-1;Dino-Group-II-Clade-1_X;Dino-Group-II-Clade-1_X_sp_;
Otu00572	0.00148388	3.90842	AB275082_1_1713_U	Eukaryota;Archaeplastida;Chlorophyta;Mamiellophyceae;Dolichomastigales;Dolichomastigaceae;Dolichomastigaceae-B;Dolichomastigaceae-B_sp_;
Otu01680	0.0051137	3.90596	KJ757689_1_1787_U	Eukaryota;Alveolata;Dinoflagellata;Syndiniales;Dino-Group-I;Dino-Group-I-Clade-8;Dino-Group-I-Clade-8_X;Dino-Group-I-Clade-8_X_sp_;
Otu01462	0.000251119	3.90323	EU090013_1_1750_U	Eukaryota;Stramenopiles;Ochrophyta;Bacillariophyta;Bacillariophyta_X;Polar-centric-Mediophyceae;Chaetoceros;Chaetoceros_neogracilis;
Otu02014	0.000251119	3.90323	AM503929_1_1802_U	Eukaryota;Alveolata;Dinoflagellata;Dinophyceae;Dinophyceae_X;Dinophyceae_XX;Dinophyceae_XXX;Dinophyceae_XXX_sp_;
Otu01568	0.000251119	3.90323	EU333034_1_800_U	Eukaryota;Alveolata;Dinoflagellata;Syndiniales;Dino-Group-II;Dino-Group-II-Clade-3;Dino-Group-II-Clade-3_X;Dino-Group-II-Clade-3_X_sp_;
Otu00566	0.00967949	3.8921	EF172980_1_1681_U	Eukaryota;Hacrobia;Haptophyta;Prymnesiophyceae;Calcihaptophycidae;Calcihaptophycidae_X;Calcihaptophycidae_XX;Calcihaptophycidae_XX_sp_;
Otu01701	0.000433751	3.88172	KJ759290_1_1793_U	Eukaryota;Opisthokonta;Metazoa;Arthropoda;Crustacea;Maxillopoda;Maxillopoda_X;Maxillopoda_X_sp_;
Otu02535	0.000365264	3.87879	KJ759486_1_1802_U	Eukaryota;Alveolata;Dinoflagellata;Dinophyceae;Dinophyceae_X;Dinophyceae_XX;Dinophyceae_XXX;Dinophyceae_XXX_sp_;
Otu01837	0.000365264	3.87879	KJ760349_1_1798_U	Eukaryota;Alveolata;Dinoflagellata;Syndiniales;Dino-Group-II;Dino-Group-II-Clade-1;Dino-Group-II-Clade-1_X;Dino-Group-II-Clade-1_X_sp_;
Otu00963	0.000205461	3.85714	KC488415_1_1696_U	Eukaryota;Alveolata;Dinoflagellata;Dinophyceae;Dinophyceae_X;Dinophyceae_XX;Dinophyceae_XXX;Dinophyceae_XXX_sp_;
Otu01321	0.000205461	3.85714	EU446389_1_1555_U	Eukaryota;Alveolata;Dinoflagellata;Syndiniales;Dino-Group-II;Dino-Group-II-Clade-4;Dino-Group-II-Clade-4_X;Dino-Group-II-Clade-4_X_sp_;
Otu01557	0.000205461	3.85714	KJ760035_1_1801_U	Eukaryota;Alveolata;Dinoflagellata;Syndiniales;Dino-Group-II;Dino-Group-II-Clade-7;Dino-Group-II-Clade-7_X;Dino-Group-II-Clade-7_X_sp_;
Otu01396	0.000205461	3.85714	KF130564_1_1762_U	Eukaryota;Hacrobia;Haptophyta;Prymnesiophyceae;Prymnesiales;Prymnesiophyceae_Clade_B4;Prymnesiophyceae_Clade_B4_X;Prymnesiophyceae_Clade_B4_X_sp_;
Otu01434	0.000205461	3.85714	HQ394099_1_841_U	Eukaryota;Stramenopiles;Ochrophyta;Bacillariophyta;Bacillariophyta_X;Radial-centric-basal-Coscinodiscophyceae;Leptocylindrus;Leptocylindrus_sp_;
Otu01459	0.000205461	3.85714	EF165125_1_1776_U	Eukaryota;Stramenopiles;Ochrophyta;Chrysophyceae;Chrysophyceae_X;Chrysophyceae_XX;Chrysophyceae_XXX;Chrysophyceae_XXX_sp_;
Otu01360	0.000205461	3.85714	AY789780_1_1176_U	Eukaryota;Stramenopiles;Opalozoa;Bicoecea;Bicoecea_X;Bicoecea_XX;Bicoecea_XXX;Bicoecea_XXX_sp_;
Otu01069	0.000388093	3.85333	KJ761374_1_1798_U	Eukaryota;Alveolata;Dinoflagellata;Dinophyceae;Dinophyceae_X;Dinophyceae_XX;Dinophyceae_XXX;Dinophyceae_XXX_sp_;
Otu02748	0.000388093	3.85333	KC488458_1_1677_U	Eukaryota;Alveolata;Dinoflagellata;Syndiniales;Dino-Group-I;Dino-Group-I-Clade-4;Dino-Group-I-Clade-4_X;Dino-Group-I-Clade-4_X_sp_;
Otu01002	0.0033102	3.85144	FN690467_1_805_U	Eukaryota;Opisthokonta;Mesomycetozoa;Ichthyosporea;Ichthyosphonida;Abeoformidae_Group_MAIP_1;Abeoformidae_Group_MAIP_1_X;Abeoformidae_Group_MAIP_1_X_sp_;
Otu04649	0.00235139	3.85082	EU503539_1_1662_U	Eukaryota;Alveolata;Ciliophora;Oligohymenophorea;Apostomatia;Foettingeriidae;Vampyrophrya;Vampyrophrya_pelagica;
Otu01595	0.00022829	3.84615	EF526760_1_1578_U	Eukaryota;Alveolata;Perkinsea;Perkinsida;Perkinsida_X;Perkinsida_XX;Perkinsida_XXX;Perkinsida_XXX_sp_;
Otu00918	0.00045658	3.84615	KC582953_1_1788_U	Eukaryota;Alveolata;Dinoflagellata;Syndiniales;Dino-Group-II;Dino-Group-II-Clade-22;Dino-Group-II-Clade-22_X;Dino-Group-II-Clade-22_X_sp_;
Otu01342	0.00022829	3.84615	KJ759399_1_1798_U	Eukaryota;Alveolata;Dinoflagellata;Dinophyceae;Dinophyceae_X;Dinophyceae_XX;Dinophyceae_XXX;Dinophyceae_XXX_sp_;
Otu02710	0.00022829	3.84615	KJ762951_1_1798_U	Eukaryota;Alveolata;Dinoflagellata;Dinophyceae;Gymnodiniales;Gymnodiniaceae;Gymnodinium;Gymnodinium_sp_;
Otu01787	0.00022829	3.84615	KJ763474_1_1808_U	Eukaryota;Alveolata;Dinoflagellata;Syndiniales;Dino-Group-II;Dino-Group-II-Clade-10-and-11;Dino-Group-II-Clade-10-and-11_X;Dino-Group-II-Clade-10-and-11_X_sp_;
Otu02280	0.000502238	3.84127	HM581709_1_1797_U	Eukaryota;Alveolata;Dinoflagellata;Syndiniales;Dino-Group-II;Dino-Group-II_X;Dino-Group-II_XX;Dino-Group-II_XX_sp_;
Otu27583	0.000342435	3.81356	FJ914419_1_1525_U	Eukaryota;Alveolata;Dinoflagellata;Dinophyceae;Dinophyceae_X;Dinophyceae_XX;Dinophyceae_XXX;Dinophyceae_XXX_sp_;
Otu01703	0.00100448	3.79608	AF274268_1_1754_U	Eukaryota;Alveolata;Dinoflagellata;Dinophyceae;Peridiniales;Kryptoperidiniaceae;Kryptoperidinium;Kryptoperidinium_foliaceum;
Otu01147	0.000547896	3.78947	FR874327_1_1747_U	Eukaryota;Alveolata;Ciliophora;Cyclotrichium_like_organism;Cyclotrichium_like_organism_X;Cyclotrichium_like_organism_XX;Cyclotrichium;Cyclotrichium_sp_;
Otu00600	0.000273948	3.78947	KJ760553_1_1771_U	Eukaryota;Alveolata;Ciliophora;Spirotrichea;Strombidiida;Tontoniidae_A;Spirotontonia;Spirotontonia_sp_;
Otu01011	0.000273948	3.78947	KJ760053_1_1794_U	Eukaryota;Alveolata;Dinoflagellata;Dinophyceae;Dinophyceae_X;Dinophyceae_XX;Dinophyceae_XXX;Dinophyceae_XXX_sp_;
Otu01836	0.000273948	3.78947	KJ763489_1_1801_U	Eukaryota;Alveolata;Dinoflagellata;Syndiniales;Dino-Group-II;Dino-Group-II-Clade-1;Dino-Group-II-Clade-1_X;Dino-Group-II-Clade-1_X_sp_;
Otu01248	0.000273948	3.78947	AB847416_1_1747_U	Eukaryota;Stramenopiles;Ochrophyta;Bacillariophyta;Bacillariophyta_X;Polar-centric-Mediophyceae;Chaetoceros;Chaetoceros_sp_;
Otu01037	0.00132408	3.78829	FN690170_1_845_U	Eukaryota;Alveolata;Dinoflagellata;Dinophyceae;Dinophyceae_X;Dinophyceae_XX;Dinophyceae_XXX;Dinophyceae_XXX_sp_;
Otu01521	0.000570725	3.78788	FN598373_1_1156_U	Eukaryota;Hacrobia;Centroheliozoa;Centroheliozoa_X;Centroheliozoa_XX;Centroheliozoa_XXX;Centroheliozoa_XXXX;Centroheliozoa_XXXX_sp_;
Otu02346	0.000502238	3.78125	AJ544115_1_1719_U	Eukaryota;Hacrobia;Haptophyta;Prymnesiophyceae;Coccolithales;Calcidiscaceae;Calcidiscus;Calcidiscus_quadriperforatus;
Otu00265	0.0169619	3.77916	JX188282_1_1758_U	Eukaryota;Alveolata;Dinoflagellata;Dinophyceae;Dinophyceae_X;Dinophyceae_XX;Dinophyceae_XXX;Dinophyceae_XXX_sp_;
Otu01847	0.00045658	3.77358	HQ599446_1_1685_U	Eukaryota;Opisthokonta;Fungi;Ascomycota;Pezizomycotina;Dothideomycetes;Massaria;Massaria_ulmi;
Otu00348	0.0204091	3.77222	JN832892_1_1013_U	Eukaryota;Opisthokonta;Mesomycetozoa;Ichthyosporea;Ichthyosphonida;Abeoformidae_Group_MAIP_2;Abeoformidae_Group_MAIP_2_X;Abeoformidae_Group_MAIP_2_X_sp_;
Otu02584	0.000159803	3.76923	KF130082_1_1756_U	Eukaryota;Alveolata;Dinoflagellata;Syndiniales;Dino-Group-II;Dino-Group-II-Clade-10-and-11;Dino-Group-II-Clade-10-and-11_X;Dino-Group-II-Clade-10-and-11_X_sp_;
Otu26397	0.000319606	3.76923	KJ759651_1_1791_U	Eukaryota;Alveolata;Dinoflagellata;Syndiniales;Dino-Group-II;Dino-Group-II_X;Dino-Group-II_XX;Dino-Group-II_XX_sp_;
Otu01529	0.000159803	3.76923	EU793923_1_925_U	Eukaryota;Alveolata;Dinoflagellata;Dinophyceae;Dinophyceae_X;Dinophyceae_XX;Dinophyceae_XXX;Dinophyceae_XXX_sp_;
Otu01718	0.000159803	3.76923	KJ760624_1_1799_U	Eukaryota;Alveolata;Dinoflagellata;Dinophyceae;Dinophyceae_X;Dinophyceae_XX;Dinophyceae_XXX;Dinophyceae_XXX_sp_;
Otu01843	0.000159803	3.76923	EU793923_1_925_U	Eukaryota;Alveolata;Dinoflagellata;Dinophyceae;Dinophyceae_X;Dinophyceae_XX;Dinophyceae_XXX;Dinophyceae_XXX_sp_;
Otu01435	0.000159803	3.76923	EU446389_1_1555_U	Eukaryota;Alveolata;Dinoflagellata;Syndiniales;Dino-Group-II;Dino-Group-II-Clade-4;Dino-Group-II-Clade-4_X;Dino-Group-II-Clade-4_X_sp_;
Otu01868	0.000159803	3.76923	EU793933_1_1559_U	Eukaryota;Alveolata;Dinoflagellata;Syndiniales;Dino-Group-II;Dino-Group-II-Clade-44;Dino-Group-II-Clade-44_X;Dino-Group-II-Clade-44_X_sp_;
Otu01518	0.000159803	3.76923	KJ763042_1_1789_U	Eukaryota;Archaeplastida;Chlorophyta;Mamiellophyceae;Dolichomastigales;Dolichomastigaceae;Dolichomastigaceae-A;Dolichomastigaceae-A_sp_;
Otu02283	0.000159803	3.76923	EU143425_1_890_U	Eukaryota;Archaeplastida;Chlorophyta;Mamiellophyceae;Mamiellales;Mamiellaceae;Mamiella;Mamiella_gilva;
Otu01981	0.000159803	3.76923	JF791041_1_1777_U	Eukaryota;Hacrobia;Picozoa;Picozoa_X;Picozoa_XX;Picozoa_XXX;Picozoa_XXXX;Picozoa_XXXX_sp_;
Otu01761	0.000159803	3.76923	GU117665_1_1549_U	Eukaryota;Hacrobia;Telonemia;Telonemia_X;Telonemia_XX;Telonemia-Group-2;Telonemia-Group-2_X;Telonemia-Group-2_X_sp_;
Otu02706	0.000159803	3.76923	AY885058_1_1178_U	Eukaryota;Rhizaria;Cercozoa;Filosa-Thecofilosea;Ebriida;Ebriida_X;Ebriida_XX;Ebriida_XX_sp_;
Otu01931	0.000410922	3.76744	KJ757275_1_1796_U	Eukaryota;Alveolata;Dinoflagellata;Dinophyceae;Gymnodiniales;Gymnodiniaceae;Gyrodinium;Gyrodinium_sp_;
Otu20564	0.00924574	3.76109	EF196703_1_824_U	Eukaryota;Alveolata;Dinoflagellata;Dinophyceae;Prorocentrales;Prorocentraceae;Prorocentrum;Prorocentrum_sp_;
Otu02485	0.000296777	3.75556	KJ760361_1_1798_U	Eukaryota;Alveolata;Dinoflagellata;Syndiniales;Dino-Group-II;Dino-Group-II-Clade-6;Dino-Group-II-Clade-6_X;Dino-Group-II-Clade-6_X_sp_;
Otu01304	0.000296777	3.75556	AY129040_1_1796_U	Eukaryota;Alveolata;Dinoflagellata;Syndiniales;Dino-Group-II;Dino-Group-II-Clade-2;Dino-Group-II-Clade-2_X;Dino-Group-II-Clade-2_X_sp_;
Otu01825	0.000388093	3.75325	KJ758904_1_1796_U	Eukaryota;Alveolata;Dinoflagellata;Syndiniales;Dino-Group-II;Dino-Group-II_X;Dino-Group-II_XX;Dino-Group-II_XX_sp_;
Otu00854	0.000525067	3.75177	JN832792_1_958_U	Eukaryota;Alveolata;Dinoflagellata;Syndiniales;Dino-Group-II;Dino-Group-II-Clade-8;Dino-Group-II-Clade-8_X;Dino-Group-II-Clade-8_X_sp_;
Otu00124	1.18375	3.74358	FJ876959_1_1683_U	Eukaryota;Alveolata;Ciliophora;Spirotrichea;Choreotrichida;Strobilidiidae_I;Pelagostrobilidium;Pelagostrobilidium_minutum;
Otu00979	0.016414	3.72743	KJ758231_1_1798_U	Eukaryota;Alveolata;Dinoflagellata;Dinophyceae;Dinophyceae_X;Dinophyceae_XX;Dinophyceae_XXX;Dinophyceae_XXX_sp_;
Otu02380	0.012145	3.70994	AB275110_1_1551_U	Eukaryota;Alveolata;Ciliophora;Litostomatea;Litostomatea_X;Litostomatea_XX;Litostomatea_XXX;Litostomatea_XXX_sp_;
Otu01839	0.000251119	3.66667	AJ537427_1_1688_U	Eukaryota;Alveolata;Ciliophora;Heterotrichea;Heterotrichea_X;Peritromidae;Peritromus;Peritromus_kahli;
Otu02770	0.000251119	3.66667	KR362889_1_1795_U	Eukaryota;Alveolata;Dinoflagellata;Dinophyceae;Peridiniales;Amphidomataceae;Azadinium;Azadinium_dexteroporum;
Otu01970	0.000251119	3.66667	EU793785_1_1664_U	Eukaryota;Alveolata;Dinoflagellata;Syndiniales;Dino-Group-II;Dino-Group-II-Clade-5;Dino-Group-II-Clade-5_X;Dino-Group-II-Clade-5_X_sp_;
Otu01971	0.00255685	3.66569	KC488495_1_1696_U	Eukaryota;Alveolata;Dinoflagellata;Syndiniales;Dino-Group-II;Dino-Group-II-Clade-1;Dino-Group-II-Clade-1_X;Dino-Group-II-Clade-1_X_sp_;
Otu01524	0.000365264	3.65714	KJ757121_1_1794_U	Eukaryota;Alveolata;Dinoflagellata;Dinophyceae;Dinophyceae_X;Dinophyceae_XX;Dinophyceae_XXX;Dinophyceae_XXX_sp_;
Otu01169	0.00182632	3.65714	AY347309_334_2135_U	Eukaryota;Alveolata;Dinoflagellata;Dinophyceae;Gymnodiniales;Gymnodiniaceae;Margalefidinium;Margalefidinium_polykrikoides;
Otu01114	0.000365264	3.65714	KJ763455_1_1798_U	Eukaryota;Alveolata;Dinoflagellata;Syndiniales;Dino-Group-II;Dino-Group-II-Clade-1;Dino-Group-II-Clade-1_X;Dino-Group-II-Clade-1_X_sp_;
Otu00747	0.00178066	3.65186	AY789782_1_1196_U	Eukaryota;Stramenopiles;Ochrophyta;Chrysophyceae;Chrysophyceae_X;Chrysophyceae_Clade-F;Paraphysomonas;Paraphysomonas_imperforata;
Otu00474	0.0033102	3.64954	AF239260_1_1699_U	Eukaryota;Alveolata;Dinoflagellata;Syndiniales;Dino-Group-II;Dino-Group-II-Clade-3;Dino-Group-II-Clade-3_X;Dino-Group-II-Clade-3_X_sp_;
Otu01116	0.000547896	3.64557	KJ757849_1_1798_U	Eukaryota;Stramenopiles;Ochrophyta;Bolidophyceae;Parmales;Parmales_env_3;Parmales_env_3_X;Parmales_env_3_X_sp_;
Otu01172	0.000547896	3.64557	FR832884_4732_6553_U	Eukaryota;Stramenopiles;Pseudofungi;Oomycota;Oomycota_X;Oomycota_XX;Albugo;Albugo_laibachii;
Otu01552	0.0100448	3.64444	AF022155_1_1790_U	Eukaryota;Alveolata;Dinoflagellata;Dinophyceae;Gonyaulacales;Gonyaulacaceae;Gonyaulax;Gonyaulax_spinifera;
Otu00981	0.00390376	3.60244	AY664975_1_1755_U	Eukaryota;Alveolata;Dinoflagellata;Dinophyceae;Dinophyceae_X;Dinophyceae_XX;Dinophyceae_XXX;Dinophyceae_XXX_sp_;
Otu12387	0.000273948	3.6	HQ394054_1_844_U	Eukaryota;Alveolata;Dinoflagellata;Dinophyceae;Dinophyceae_X;Dinophyceae_XX;Dinophyceae_XXX;Dinophyceae_XXX_sp_;
Otu01516	0.000273948	3.6	GQ483674_1_817_U	Eukaryota;Alveolata;Dinoflagellata;Dinophyceae;Suessiales;Suessiaceae;Suessiaceae_X;Suessiaceae_X_sp_;
Otu02503	0.000136974	3.6	KJ760651_1_1788_U	Eukaryota;Alveolata;Dinoflagellata;Syndiniales;Dino-Group-I;Dino-Group-I-Clade-1;Dino-Group-I-Clade-1_X;Dino-Group-I-Clade-1_X_sp_;
Otu01973	0.000136974	3.6	DQ471031_1_1682_U	Eukaryota;Opisthokonta;Fungi;Ascomycota;Pezizomycotina;Sordariomycetes;Ambrosiella;Ambrosiella_xylebori;
Otu02258	0.000136974	3.6	MG972211_1_1717_U	Eukaryota;Stramenopiles;Ochrophyta;Bacillariophyta;Bacillariophyta_X;Polar-centric-Mediophyceae;Chaetoceros;Chaetoceros_atlanticus;
Otu01485	0.000136974	3.6	EF526910_1_1345_U	Eukaryota;Alveolata;Dinoflagellata;Dinophyceae;Dinophyceae_X;Dinophyceae_XX;Dinophyceae_XXX;Dinophyceae_XXX_sp_;
Otu01650	0.000136974	3.6	KJ763295_1_1800_U	Eukaryota;Alveolata;Dinoflagellata;Dinophyceae;Gonyaulacales;Ceratiaceae;Tripos;Tripos_fusus;
Otu01536	0.000136974	3.6	KF130222_1_1745_U	Eukaryota;Alveolata;Dinoflagellata;Syndiniales;Dino-Group-I;Dino-Group-I-Clade-5;Dino-Group-I-Clade-5_X;Dino-Group-I-Clade-5_X_sp_;
Otu01828	0.000136974	3.6	KJ758732_1_1796_U	Eukaryota;Alveolata;Dinoflagellata;Syndiniales;Dino-Group-II;Dino-Group-II-Clade-3;Dino-Group-II-Clade-3_X;Dino-Group-II-Clade-3_X_sp_;
Otu01687	0.000136974	3.6	EF526908_1_1342_U	Eukaryota;Alveolata;Dinoflagellata;Syndiniales;Dino-Group-II;Dino-Group-II-Clade-5;Dino-Group-II-Clade-5_X;Dino-Group-II-Clade-5_X_sp_;
Otu01512	0.000136974	3.6	GQ365836_1_1545_U	Eukaryota;Hacrobia;Telonemia;Telonemia_X;Telonemia_XX;Telonemia-Group-2;Telonemia-Group-2_X;Telonemia-Group-2_X_sp_;
Otu02642	0.000136974	3.6	DQ310306_1_1334_U	Eukaryota;Opisthokonta;Choanoflagellida;Choanoflagellatea;Acanthoecida;Stephanoecidae_Group_H;Stephanoecidae_Group_H_X;Stephanoecidae_Group_H_X_sp_;
Otu01635	0.000136974	3.6	AB246746_1_1727_U	Eukaryota;Stramenopiles;Ochrophyta;Bacillariophyta;Bacillariophyta_X;Polar-centric-Mediophyceae;Chaetoceros;Chaetoceros_sp_P__quinquecorne_endosymbiont;
Otu01664	0.000136974	3.6	KC582994_1_1780_U	Eukaryota;Stramenopiles;Ochrophyta;Chrysophyceae;Chrysophyceae_X;Chrysophyceae_Clade-H;Chrysophyceae_Clade-H_X;Chrysophyceae_Clade-H_X_sp_;
Otu01726	0.000136974	3.6	KJ759482_1_1801_U	Eukaryota;Stramenopiles;Ochrophyta;MOCH-2;MOCH-2_X;MOCH-2_XX;MOCH-2_XXX;MOCH-2_XXX_sp_;
Otu02429	0.000136974	3.6	EF526882_1_1809_U	Eukaryota;Stramenopiles;Ochrophyta;MOCH-2;MOCH-2_X;MOCH-2_XX;MOCH-2_XXX;MOCH-2_XXX_sp_;
Otu01355	0.000136974	3.6	EF173010_1_1664_U	Eukaryota;Stramenopiles;Pseudofungi;MAST-1;MAST-1D;MAST-1D_X;MAST-1D_XX;MAST-1D_XX_sp_;
Otu00904	0.000707699	3.59925	MG972209_1_1724_U	Eukaryota;Stramenopiles;Ochrophyta;Bacillariophyta;Bacillariophyta_X;Polar-centric-Mediophyceae;Bacteriastrum;Bacteriastrum_parallelum;
Otu01381	0.000525067	3.59864	EF434275_1_1734_U	Eukaryota;Alveolata;Dinoflagellata;Dinophyceae;Suessiales;Suessiaceae;Polarella;Polarella_glacialis;
Otu01453	0.000296777	3.59574	KJ763473_1_1800_U	Eukaryota;Alveolata;Dinoflagellata;Syndiniales;Dino-Group-II;Dino-Group-II-Clade-1;Dino-Group-II-Clade-1_X;Dino-Group-II-Clade-1_X_sp_;
Otu01164	0.000753357	3.59406	HM628664_1_1537_U	Eukaryota;Alveolata;Ciliophora;Colpodea;Colpodea_X;Bursariomorphida;Bursariomorphida_X;Bursariomorphida_X_sp_;
Otu00780	0.0029906	3.58342	JN832708_1_1770_U	Eukaryota;Alveolata;Dinoflagellata;Dinophyceae;Dinophyceae_X;Dinophyceae_XX;Dinophyceae_XXX;Dinophyceae_XXX_sp_;
Otu00900	0.00164369	3.58011	JN832892_1_1013_U	Eukaryota;Opisthokonta;Mesomycetozoa;Ichthyosporea;Ichthyosphonida;Abeoformidae_Group_MAIP_2;Abeoformidae_Group_MAIP_2_X;Abeoformidae_Group_MAIP_2_X_sp_;
Otu01526	0.00022829	3.57143	AB183673_1_1754_U	Eukaryota;Alveolata;Dinoflagellata;Dinophyceae;Prorocentrales;Prorocentraceae;Prorocentrum;Prorocentrum_triestinum;
Otu01382	0.00022829	3.57143	KJ759466_1_1798_U	Eukaryota;Alveolata;Dinoflagellata;Syndiniales;Dino-Group-II;Dino-Group-II_X;Dino-Group-II_XX;Dino-Group-II_XX_sp_;
Otu01849	0.00022829	3.57143	EU143417_1_904_U	Eukaryota;Archaeplastida;Chlorophyta;Pyramimonadophyceae;Pyramimonadales;Halosphaeraceae;Halosphaera;Halosphaera_sp_;
Otu01580	0.00022829	3.57143	EF526728_1_1553_U	Eukaryota;Opisthokonta;Choanoflagellida;Choanoflagellatea;Acanthoecida;Stephanoecidae_Group_H;Stephanoecidae_Group_H_X;Stephanoecidae_Group_H_X_sp_;
Otu01581	0.00022829	3.57143	KJ757849_1_1798_U	Eukaryota;Stramenopiles;Ochrophyta;Bolidophyceae;Parmales;Parmales_env_3;Parmales_env_3_X;Parmales_env_3_X_sp_;
Otu02577	0.000114145	3.57143	FR874268_1_1798_U	Eukaryota;Alveolata;Dinoflagellata;Syndiniales;Dino-Group-II;Dino-Group-II_X;Dino-Group-II_XX;Dino-Group-II_XX_sp_;
Otu02611	0.000114145	3.57143	KJ763101_1_1798_U	Eukaryota;Alveolata;Dinoflagellata;Syndiniales;Dino-Group-II;Dino-Group-II-Clade-12;Dino-Group-II-Clade-12_X;Dino-Group-II-Clade-12_X_sp_;
Otu01455	0.000114145	3.57143	EU780613_1_1717_U	Eukaryota;Alveolata;Dinoflagellata;Syndiniales;Dino-Group-II;Dino-Group-II-Clade-16;Dino-Group-II-Clade-16_X;Dino-Group-II-Clade-16_X_sp_;
Otu16162	0.000114145	3.57143	EU792994_1_837_U	Eukaryota;Alveolata;Dinoflagellata;Syndiniales;Dino-Group-II;Dino-Group-II-Clade-24;Dino-Group-II-Clade-24_X;Dino-Group-II-Clade-24_X_sp_;
Otu02298	0.000114145	3.57143	KJ762931_1_1798_U	Eukaryota;Alveolata;Dinoflagellata;Syndiniales;Dino-Group-III;Dino-Group-III_X;Dino-Group-III_XX;Dino-Group-III_XX_sp_;
Otu02817	0.000114145	3.57143	KF129747_1_1749_U	Eukaryota;Hacrobia;Telonemia;Telonemia_X;Telonemia_XX;Telonemia-Group-2;Telonemia-Group-2_X;Telonemia-Group-2_X_sp_;
Otu02425	0.000114145	3.57143	KC670135_1_1742_U	Eukaryota;Opisthokonta;Fungi;Basidiomycota;Ustilaginomycotina;Exobasidiomycetes;Exobasidiomycetes_X;Exobasidiomycetes_X_sp_;
Otu11217	0.000114145	3.57143	AB246695_1_1722_U	Eukaryota;Rhizaria;Radiolaria;Polycystinea;Spumellaria;Spongobrachiidae;Spongodiscus_E2;Spongodiscus_E2_biconcavus;
Otu01176	0.000388093	3.5679	DQ093795_1_1761_U	Eukaryota;Alveolata;Apicomplexa;Gregarinomorphea;Eugregarinorida;Lecudinidae;Lithocystis;Lithocystis_sp_;
Otu00054	0.519976	3.55598	FN690467_1_805_U	Eukaryota;Opisthokonta;Mesomycetozoa;Ichthyosporea;Ichthyosphonida;Abeoformidae_Group_MAIP_1;Abeoformidae_Group_MAIP_1_X;Abeoformidae_Group_MAIP_1_X_sp_;
Otu02120	0.000182632	3.55556	EF172809_1_1601_U	Eukaryota;Alveolata;Dinoflagellata;Dinophyceae;Dinophyceae_X;Dinophyceae_XX;Dinophyceae_XXX;Dinophyceae_XXX_sp_;
Otu01943	0.000182632	3.55556	KJ763489_1_1801_U	Eukaryota;Alveolata;Dinoflagellata;Syndiniales;Dino-Group-II;Dino-Group-II-Clade-1;Dino-Group-II-Clade-1_X;Dino-Group-II-Clade-1_X_sp_;
Otu02209	0.000182632	3.55556	JX188342_1_1759_U	Eukaryota;Alveolata;Dinoflagellata;Syndiniales;Dino-Group-II;Dino-Group-II-Clade-10-and-11;Dino-Group-II-Clade-10-and-11_X;Dino-Group-II-Clade-10-and-11_X_sp_;
Otu01280	0.000182632	3.55556	HM581749_1_1797_U	Eukaryota;Alveolata;Dinoflagellata;Syndiniales;Dino-Group-II;Dino-Group-II-Clade-25;Dino-Group-II-Clade-25_X;Dino-Group-II-Clade-25_X_sp_;
Otu01487	0.000182632	3.55556	EU793924_1_918_U	Eukaryota;Alveolata;Dinoflagellata;Syndiniales;Dino-Group-II;Dino-Group-II-Clade-4;Dino-Group-II-Clade-4_X;Dino-Group-II-Clade-4_X_sp_;
Otu01767	0.000182632	3.55556	KJ760569_1_1796_U	Eukaryota;Alveolata;Dinoflagellata;Syndiniales;Dino-Group-II;Dino-Group-II-Clade-6;Dino-Group-II-Clade-6_X;Dino-Group-II-Clade-6_X_sp_;
Otu02725	0.000182632	3.55556	GQ365796_1_1539_U	Eukaryota;Hacrobia;Telonemia;Telonemia_X;Telonemia_XX;Telonemia-Group-2;Telonemia-Group-2_X;Telonemia-Group-2_X_sp_;
Otu01956	0.000182632	3.55556	FJ800620_1_1360_U	Eukaryota;Stramenopiles;Sagenista;Labyrinthulomycetes;Thraustochytrida;Thraustochytriaceae;Thraustochytriaceae_LAB17;Thraustochytriaceae_LAB17_sp_;
Otu00752	0.0112775	3.54961	KF129865_1_1761_U	Eukaryota;Alveolata;Dinoflagellata;Dinophyceae;Dinophyceae_X;Dinophyceae_XX;Dinophyceae_XXX;Dinophyceae_XXX_sp_;
Otu01446	0.00125559	3.54631	JQ956280_1_1704_U	Eukaryota;Alveolata;Dinoflagellata;Dinophyceae;Dinophyceae_X;Dinophyceae_XX;Dinophyceae_XXX;Dinophyceae_XXX_sp_;
Otu01752	0.00189481	3.53826	GU117665_1_1549_U	Eukaryota;Hacrobia;Telonemia;Telonemia_X;Telonemia_XX;Telonemia-Group-2;Telonemia-Group-2_X;Telonemia-Group-2_X_sp_;
Otu01000	0.00191764	3.53507	JN832892_1_1013_U	Eukaryota;Opisthokonta;Mesomycetozoa;Ichthyosporea;Ichthyosphonida;Abeoformidae_Group_MAIP_2;Abeoformidae_Group_MAIP_2_X;Abeoformidae_Group_MAIP_2_X_sp_;
Otu02793	0.00125559	3.52975	KC583005_1_1808_U	Eukaryota;Stramenopiles;Opalozoa;MAST-12;MAST-12A;MAST-12A_X;MAST-12A_XX;MAST-12A_XX_sp_;
Otu01051	0.000479409	3.528	KJ763057_1_1797_U	Eukaryota;Alveolata;Dinoflagellata;Dinophyceae;Gymnodiniales;Gymnodiniaceae;Gyrodinium;Gyrodinium_sp_;
Otu01022	0.000410922	3.52174	KJ762832_1_1801_U	Eukaryota;Alveolata;Dinoflagellata;Dinophyceae;Dinophyceae_X;Dinophyceae_XX;Dinophyceae_XXX;Dinophyceae_XXX_sp_;
Otu01444	0.000205461	3.52174	DJ062822_1_1720_U	Eukaryota;Opisthokonta;Fungi;Ascomycota;Pezizomycotina;Sordariomycetes;Microascus;Microascus_manginii;
Otu02515	0.000799015	3.51003	EU399534_1_1685_U	Eukaryota;Alveolata;Ciliophora;Spirotrichea;Tintinnida;Eutintinnidae;Eutintinnus;Eutintinnus_fraknoi;
Otu00897	0.00712265	3.50916	JN547311_1_949_U	Eukaryota;Opisthokonta;Fungi;Chytridiomycota;Chytridiomycotina;Chytridiomycetes;Rhyzophidiales_X;Rhyzophidiales_X_sp_;
Otu01083	0.00045658	3.50877	AB183588_1_1750_U	Eukaryota;Hacrobia;Haptophyta;Pavlovophyceae;Pavlovales;Pavlovaceae;Pavlova;Pavlova_sp_;
Otu01895	0.00120994	3.50687	KC488379_1_1660_U	Eukaryota;Alveolata;Ciliophora;Spirotrichea;Strombidiida;Strombidiidae_L;Strombidiidae_L_X;Strombidiidae_L_X_sp_;
Otu02288	0.000319606	3.5	JF791106_1_1777_U	Eukaryota;Stramenopiles;Ochrophyta;Bacillariophyta;Bacillariophyta_X;Polar-centric-Mediophyceae;Polar-centric-Mediophyceae_X;Polar-centric-Mediophyceae_X_sp_;
Otu01578	0.00159803	3.49003	AJ238663_1_1795_U	Eukaryota;Stramenopiles;Pseudofungi;Oomycota;Oomycota_X;Leptomitales;Apodachlya;Apodachlya_brachynema;
Otu00138	0.0147704	3.48269	EU143436_1_890_U	Eukaryota;Archaeplastida;Chlorophyta;Mamiellophyceae;Mamiellales;Mamiellaceae;Mantoniella;Mantoniella_squamata;
Otu01720	0.000342435	3.46154	AB275041_1_1657_U	Eukaryota;Stramenopiles;Sagenista;MAST-9;MAST-9C;MAST-9C_X;MAST-9C_XX;MAST-9C_XX_sp_;
Otu39663	0.000753357	3.45714	KJ763496_1_1796_U	Eukaryota;Alveolata;Dinoflagellata;Syndiniales;Dino-Group-I;Dino-Group-I-Clade-2;Dino-Group-I-Clade-2_X;Dino-Group-I-Clade-2_X_sp_;
Otu02685	0.000251119	3.45714	KC583022_1_1786_U	Eukaryota;Stramenopiles;Stramenopiles_X;Stramenopiles_XX;Stramenopiles_XXX;Stramenopiles_XXXX;Stramenopiles_XXXXX;Stramenopiles_XXXXX_sp_;
Otu01031	0.000296777	3.44898	KJ763357_1_1803_U	Eukaryota;Alveolata;Dinoflagellata;Syndiniales;Dino-Group-II;Dino-Group-II-Clade-3;Dino-Group-II-Clade-3_X;Dino-Group-II-Clade-3_X_sp_;
Otu02207	0.000433751	3.4381	KJ761365_1_1795_U	Eukaryota;Alveolata;Dinoflagellata;Syndiniales;Dino-Group-II;Dino-Group-II-Clade-21;Dino-Group-II-Clade-21_X;Dino-Group-II-Clade-21_X_sp_;
Otu02742	0.000479409	3.4186	HM749932_1_1455_U	Eukaryota;Stramenopiles;Opalozoa;Bicoecea;Bicoecales;Bicoecaceae;Bicosoeca;Bicosoeca_sp_;
Otu01507	0.000662041	3.40486	FN598266_1_1052_U	Eukaryota;Alveolata;Ciliophora;Phyllopharyngea;Cyrtophoria_1;PHYLL_4;PHYLL_4_X;PHYLL_4_X_sp_;
Otu01208	0.000776186	3.4	KF129839_1_1764_U	Eukaryota;Stramenopiles;Opalozoa;MAST-12;MAST-12D;MAST-12D_X;MAST-12D_XX;MAST-12D_XX_sp_;
Otu00858	0.0111634	3.39232	HO782551_140_1373_U	Eukaryota;Archaeplastida;Streptophyta;Embryophyceae;Embryophyceae_X;Embryophyceae_XX;Phaseolus;Phaseolus_acutifolius;
Otu01746	0.000319606	3.37931	KJ763671_1_1796_U	Eukaryota;Alveolata;Dinoflagellata;Syndiniales;Dino-Group-II;Dino-Group-II-Clade-1;Dino-Group-II-Clade-1_X;Dino-Group-II-Clade-1_X_sp_;
Otu01989	0.000525067	3.36943	EU446305_1_1544_U	Eukaryota;Opisthokonta;Choanoflagellida;Choanoflagellatea;Acanthoecida;Stephanoecidae_Group_H;Stephanoecidae_Group_H_X;Stephanoecidae_Group_H_X_sp_;
Otu01333	0.000479409	3.36641	AY665062_1_1718_U	Eukaryota;Alveolata;Ciliophora;Oligohymenophorea;OLIGO5;OLIGO5_X;OLIGO5_XX;OLIGO5_XX_sp_;
Otu00989	0.00114145	3.36022	FN690198_1_1699_U	Eukaryota;Alveolata;Dinoflagellata;Dinophyceae;Dinophyceae_X;Dinophyceae_XX;Dinophyceae_XXX;Dinophyceae_XXX_sp_;
Otu01394	0.000342435	3.35821	KJ761791_1_1776_U	Eukaryota;Alveolata;Ciliophora;Spirotrichea;Strombidiida;Strombidiida_X;Strombidiida_XX;Strombidiida_XX_sp_;
Otu02292	0.000821844	3.34021	KJ763729_1_1789_U	Eukaryota;Alveolata;Dinoflagellata;Syndiniales;Dino-Group-I;Dino-Group-I-Clade-5;Dino-Group-I-Clade-5_X;Dino-Group-I-Clade-5_X_sp_;
Otu01732	0.00022829	3.33333	AB287418_1_4117_G	Eukaryota;Stramenopiles;Pseudofungi;Oomycota;Oomycota_X;Olpidophydiales;Olpidiopsis;Olpidiopsis_porphyrae;
Otu01631	0.00467994	3.32871	KJ760035_1_1801_U	Eukaryota;Alveolata;Dinoflagellata;Syndiniales;Dino-Group-II;Dino-Group-II-Clade-7;Dino-Group-II-Clade-7_X;Dino-Group-II-Clade-7_X_sp_;
Otu00636	0.0121679	3.32645	AF106050_1_1774_U	Eukaryota;Hacrobia;Haptophyta;Pavlovophyceae;Pavlovales;Pavlovaceae;Exanthemachrysis;Exanthemachrysis_gayraliae;
Otu01207	0.0232627	3.32411	KJ925235_1_1651_U	Eukaryota;Alveolata;Ciliophora;CONTH_7;CONTH_7_X;CONTH_7_XX;CONTH_7_XXX;CONTH_7_XXX_sp_;
Otu00401	0.0714548	3.31572	EU446389_1_1555_U	Eukaryota;Alveolata;Dinoflagellata;Syndiniales;Dino-Group-II;Dino-Group-II-Clade-4;Dino-Group-II-Clade-4_X;Dino-Group-II-Clade-4_X_sp_;
Otu21079	0.000593554	3.31373	JQ226764_1_1625_U	Eukaryota;Alveolata;Dinoflagellata;Syndiniales;Dino-Group-II;Dino-Group-II-Clade-5;Dino-Group-II-Clade-5_X;Dino-Group-II-Clade-5_X_sp_;
Otu01743	0.000410922	3.30612	KJ759701_1_1804_U	Eukaryota;Alveolata;Dinoflagellata;Dinophyceae;Dinophyceae_X;Dinophyceae_XX;Dinophyceae_XXX;Dinophyceae_XXX_sp_;
Otu01738	0.000410922	3.30612	AY208893_1_1819_U	Eukaryota;Alveolata;Dinoflagellata;Syndiniales;Dino-Group-II;Dino-Group-II-Clade-4;Amoebophrya;Amoebophrya_ceratii;
Otu22841	0.000365264	3.28205	KJ762753_1_1798_U	Eukaryota;Alveolata;Dinoflagellata;Syndiniales;Dino-Group-II;Dino-Group-II-Clade-1;Dino-Group-II-Clade-1_X;Dino-Group-II-Clade-1_X_sp_;
Otu01620	0.000365264	3.28205	KF130299_1_1759_U	Eukaryota;Alveolata;Dinoflagellata;Syndiniales;Dino-Group-II;Dino-Group-II-Clade-8;Dino-Group-II-Clade-8_X;Dino-Group-II-Clade-8_X_sp_;
Otu40779	0.00180349	3.27612	KJ758342_1_1743_U	Eukaryota;Alveolata;Ciliophora;Spirotrichea;Choreotrichida;Leegaardiellidae_B;Leegaardiella;Leegaardiella_sp_;
Otu28885	0.000273948	3.27273	HM749935_1_1541_U	Eukaryota;Stramenopiles;Stramenopiles_X;Stramenopiles_XX;Stramenopiles_XXX;Stramenopiles_XXXX;Stramenopiles_XXXXX;Stramenopiles_XXXXX_sp_;
Otu01679	0.000890331	3.27097	DQ103798_1_1634_U	Eukaryota;Alveolata;Dinoflagellata;Syndiniales;Dino-Group-I;Dino-Group-I-Clade-4;Dino-Group-I-Clade-4_X;Dino-Group-I-Clade-4_X_sp_;
Otu01414	0.000251119	3.27027	EU793219_1_1532_U	Eukaryota;Alveolata;Dinoflagellata;Syndiniales;Dino-Group-II;Dino-Group-II-Clade-22;Dino-Group-II-Clade-22_X;Dino-Group-II-Clade-22_X_sp_;
Otu01504	0.000251119	3.27027	AB854001_1_1758_U	Eukaryota;Archaeplastida;Chlorophyta;Pyramimonadophyceae;Pyramimonadales;Pyramimonadaceae;Pyramimonas;Pyramimonas_sp_;
Otu01745	0.000251119	3.27027	KC583005_1_1808_U	Eukaryota;Stramenopiles;Opalozoa;MAST-12;MAST-12A;MAST-12A_X;MAST-12A_XX;MAST-12A_XX_sp_;
Otu01433	0.000616383	3.26906	KJ762610_1_1763_U	Eukaryota;Alveolata;Ciliophora;Oligohymenophorea;OLIGO5;OLIGO5_X;OLIGO5_XX;OLIGO5_XX_sp_;
Otu01569	0.000319606	3.26667	EF426540_1_1806_U	Eukaryota;Stramenopiles;Pseudofungi;Oomycota;Oomycota_X;Oomycota_XX;Plasmopara;Plasmopara_viticola;
Otu01832	0.000159803	3.26667	AB275019_1_1721_U	Eukaryota;Alveolata;Dinoflagellata;Dinophyceae;Dinophyceae_X;Dinophyceae_XX;Dinophyceae_XXX;Dinophyceae_XXX_sp_;
Otu02106	0.000159803	3.26667	EU143396_1_902_U	Eukaryota;Archaeplastida;Chlorophyta;Mamiellophyceae;Dolichomastigales;Crustomastigaceae;Crustomastigaceae-AB;Crustomastigaceae-AB_sp_;
Otu11981	0.000159803	3.26667	EF527179_1_1558_U	Eukaryota;Stramenopiles;Pseudofungi;Oomycota;Oomycota_X;Oomycota_XX;Oomycota_XXX;Oomycota_XXX_sp_;
Otu01437	0.000319606	3.26667	KJ758222_1_1798_U	Eukaryota;Alveolata;Dinoflagellata;Dinophyceae;Dinophyceae_X;Dinophyceae_XX;Dinophyceae_XXX;Dinophyceae_XXX_sp_;
Otu02062	0.000159803	3.26667	KF130083_1_1757_U	Eukaryota;Alveolata;Dinoflagellata;Syndiniales;Dino-Group-II;Dino-Group-II-Clade-17;Dino-Group-II-Clade-17_X;Dino-Group-II-Clade-17_X_sp_;
Otu01892	0.000159803	3.26667	KC582999_1_2114_U	Eukaryota;Stramenopiles;Ochrophyta;Chrysophyceae;Chrysophyceae_X;Chrysophyceae_Clade-H;Chrysophyceae_Clade-H_X;Chrysophyceae_Clade-H_X_sp_;
Otu01133	0.000342435	3.26087	EU793789_1_1508_U	Eukaryota;Alveolata;Dinoflagellata;Syndiniales;Dino-Group-II;Dino-Group-II-Clade-16;Dino-Group-II-Clade-16_X;Dino-Group-II-Clade-16_X_sp_;
Otu01934	0.00351567	3.2568	DQ781328_1_1124_U	Eukaryota;Alveolata;Dinoflagellata;Dinophyceae;Dinophyceae_X;Dinophyceae_XX;Dinophyceae_XXX;Dinophyceae_XXX_sp_;
Otu01081	0.0029906	3.24466	JX188282_1_1758_U	Eukaryota;Alveolata;Dinoflagellata;Dinophyceae;Dinophyceae_X;Dinophyceae_XX;Dinophyceae_XXX;Dinophyceae_XXX_sp_;
Otu01214	0.000205461	3.24	KJ759584_1_1803_U	Eukaryota;Alveolata;Dinoflagellata;Dinophyceae;Dinophysiales;Dinophysaceae;Dinophysaceae_X;Dinophysaceae_X_sp_;
Otu00555	0.00666607	3.23141	KJ763459_1_1799_U	Eukaryota;Alveolata;Dinoflagellata;Syndiniales;Dino-Group-II;Dino-Group-II-Clade-26;Dino-Group-II-Clade-26_X;Dino-Group-II-Clade-26_X_sp_;
Otu00924	0.00045658	3.22581	EF527109_1_1755_U	Eukaryota;Alveolata;Dinoflagellata;Dinophyceae;Gonyaulacales;Ceratiaceae;Ceratium;Ceratium_sp_;
Otu01715	0.000525067	3.20606	KJ760518_1_1794_U	Eukaryota;Alveolata;Dinoflagellata;Syndiniales;Dino-Group-II;Dino-Group-II-Clade-44;Dino-Group-II-Clade-44_X;Dino-Group-II-Clade-44_X_sp_;
Otu01824	0.000365264	3.2	KJ762524_1_1795_U	Eukaryota;Alveolata;Dinoflagellata;Syndiniales;Dino-Group-II;Dino-Group-II-Clade-6;Dino-Group-II-Clade-6_X;Dino-Group-II-Clade-6_X_sp_;
Otu01596	0.000182632	3.2	GQ995337_1_1775_U	Eukaryota;Opisthokonta;Fungi;Chytridiomycota;Chytridiomycotina;Chytridiomycetes;Spizellomycetales-and-Rhizophlyctidales;Spizellomycetales-and-Rhizophlyctidales_sp_;
Otu18520	0.000182632	3.2	AY425318_1_1734_U	Eukaryota;Archaeplastida;Chlorophyta;Mamiellophyceae;Mamiellales;Mamiellaceae;Micromonas;Micromonas_clade_B4;
Otu01822	0.000182632	3.2	AY426868_1_1778_U	Eukaryota;Opisthokonta;Choanoflagellida;Choanoflagellatea;Acanthoecida;Stephanoecidae_Group_E;Stephanoecidae_Group_E_X;Stephanoecidae_Group_E_X_sp_;
Otu00984	0.0022829	3.19898	JX188313_1_1769_U	Eukaryota;Archaeplastida;Chlorophyta;Chloropicophyceae;Chloropicales;Chloropicaceae;Chloroparvula;Chloroparvula_B2_sp_;
Otu01749	0.00045658	3.1746	KJ757257_1_1777_U	Eukaryota;Alveolata;Ciliophora;Spirotrichea;Strombidiida;Strombidiidae_H;Strombidiidae_H_X;Strombidiidae_H_X_sp_;
Otu01634	0.000342435	3.16901	FJ832159_1_1751_U	Eukaryota;Alveolata;Apicomplexa;Gregarinomorphea;Eugregarinorida;Urosporidae;Difficilina;Difficilina_paramertis;
Otu05491	0.000525067	3.16766	KJ757320_1_1789_U	Eukaryota;Alveolata;Dinoflagellata;Dinophyceae;Dinophyceae_X;Dinophyceae_XX;Dinophyceae_XXX;Dinophyceae_XXX_sp_;
Otu01077	0.0014154	3.16639	AY665022_1_1751_U	Eukaryota;Alveolata;Dinoflagellata;Syndiniales;Dino-Group-I;Dino-Group-I-Clade-5;Dino-Group-I-Clade-5_X;Dino-Group-I-Clade-5_X_sp_;
Otu01577	0.00246553	3.16612	KC911781_1_818_U	Eukaryota;Alveolata;Ciliophora;CONThreeP;CONThreeP_X;CONThreeP_XX;CONThreeP_XXX;CONThreeP_XXX_sp_;
Otu01854	0.00136974	3.16344	KF130313_1_1755_U	Eukaryota;Alveolata;Dinoflagellata;Syndiniales;Dino-Group-I;Dino-Group-I-Clade-5;Dino-Group-I-Clade-5_X;Dino-Group-I-Clade-5_X_sp_;
Otu01269	0.000319606	3.16129	JN615412_1_1457_U	Eukaryota;Alveolata;Dinoflagellata;Dinophyceae;Peridiniales;Amphidomataceae;Amphidoma;Amphidoma_languida;
Otu01110	0.00134691	3.15594	KJ760035_1_1801_U	Eukaryota;Alveolata;Dinoflagellata;Syndiniales;Dino-Group-II;Dino-Group-II-Clade-7;Dino-Group-II-Clade-7_X;Dino-Group-II-Clade-7_X_sp_;
Otu01238	0.00130125	3.15131	AJ402358_1_1758_U	Eukaryota;Archaeplastida;Chlorophyta;Chloropicophyceae;Chloropicales;Chloropicaceae;Chloroparvula;Chloroparvula_pacifica;
Otu02339	0.000273948	3.13043	KF130091_1_1753_U	Eukaryota;Alveolata;Dinoflagellata;Syndiniales;Dino-Group-II;Dino-Group-II_X;Dino-Group-II-Clade-52_X;Dino-Group-II-Clade-52_X_sp_;
Otu02697	0.000273948	3.13043	EU793710_1_1576_U	Eukaryota;Alveolata;Dinoflagellata;Syndiniales;Dino-Group-II;Dino-Group-II-Clade-1;Dino-Group-II-Clade-1_X;Dino-Group-II-Clade-1_X_sp_;
Otu26282	0.000273948	3.13043	JN832892_1_1013_U	Eukaryota;Opisthokonta;Mesomycetozoa;Ichthyosporea;Ichthyosphonida;Abeoformidae_Group_MAIP_2;Abeoformidae_Group_MAIP_2_X;Abeoformidae_Group_MAIP_2_X_sp_;
Otu28280	0.0010273	3.12983	KJ759731_1_1795_U	Eukaryota;Alveolata;Dinoflagellata;Syndiniales;Dino-Group-II;Dino-Group-II-Clade-3;Dino-Group-II-Clade-3_X;Dino-Group-II-Clade-3_X_sp_;
Otu00709	0.00262533	3.12574	EU446389_1_1555_U	Eukaryota;Alveolata;Dinoflagellata;Syndiniales;Dino-Group-II;Dino-Group-II-Clade-4;Dino-Group-II-Clade-4_X;Dino-Group-II-Clade-4_X_sp_;
Otu02253	0.00022829	3.125	JQ420087_1_1780_U	Eukaryota;Alveolata;Dinoflagellata;Syndiniales;Dino-Group-II;Dino-Group-II-Clade-3;Dino-Group-II-Clade-3_X;Dino-Group-II-Clade-3_X_sp_;
Otu02251	0.00022829	3.125	MG972209_1_1724_U	Eukaryota;Stramenopiles;Ochrophyta;Bacillariophyta;Bacillariophyta_X;Polar-centric-Mediophyceae;Bacteriastrum;Bacteriastrum_parallelum;
Otu04489	0.00022829	3.125	AB085831_1_1661_U	Eukaryota;Stramenopiles;Ochrophyta;Bacillariophyta;Bacillariophyta_X;Raphid-pennate;Eunotia;Eunotia_monodon_v_asiatica;
Otu01109	0.00287645	3.1105	EU446389_1_1555_U	Eukaryota;Alveolata;Dinoflagellata;Syndiniales;Dino-Group-II;Dino-Group-II-Clade-4;Dino-Group-II-Clade-4_X;Dino-Group-II-Clade-4_X_sp_;
Otu02152	0.00479409	3.10476	KX906568_1_1634_U	Eukaryota;Alveolata;Ciliophora;Oligohymenophorea;Apostomatia;Foettingeriidae;Synophrya;Synophrya_sp_;
Otu00697	0.00988496	3.10315	KF130514_1_1749_U	Eukaryota;Alveolata;Dinoflagellata;Syndiniales;Dino-Group-I;Dino-Group-I-Clade-3;Dino-Group-I-Clade-3_X;Dino-Group-I-Clade-3_X_sp_;
Otu00598	0.00207744	3.10266	AB505510_1_1640_U	Eukaryota;Alveolata;Ciliophora;Oligohymenophorea;Scuticociliatia_1;Philasterida;Philasterida_X;Philasterida_X_sp_;
Otu01924	0.000251119	3.10256	AJ236027_1_1766_U	Eukaryota;Archaeplastida;Streptophyta;Embryophyceae;Embryophyceae_X;Embryophyceae_XX;Pentas;Pentas_lanceolata;
Otu02121	0.000251119	3.10256	AJ415519_1_1755_U	Eukaryota;Alveolata;Dinoflagellata;Dinophyceae;Prorocentrales;Prorocentraceae;Prorocentrum;Prorocentrum_micans;
Otu01755	0.000593554	3.10092	KJ763175_1_1759_U	Eukaryota;Alveolata;Ciliophora;Spirotrichea;Choreotrichida;Strobilidiidae_I;Pelagostrobilidium;Pelagostrobilidium_sp_;
Otu01491	0.000342435	3.08219	AY180012_1_1739_U	Eukaryota;Rhizaria;Cercozoa;Filosa-Thecofilosea;Ventricleftida;CCW10-lineage;CCW10-lineage_X;CCW10-lineage_X_sp_;
Otu00319	0.00159803	3.08176	DQ868351_1_1731_U	Eukaryota;Alveolata;Ciliophora;Oligohymenophorea;Peritrichia_2;Zoothamniidae;Zoothamnium_2;Zoothamnium_pelagicum;
Otu02538	0.00392659	3.07654	FN690259_1_1697_U	Eukaryota;Alveolata;Dinoflagellata;Dinophyceae;Suessiales;Suessiaceae;Suessiaceae_X;Suessiaceae_X_sp_;
Otu00144	0.0424619	3.07576	FN690467_1_805_U	Eukaryota;Opisthokonta;Mesomycetozoa;Ichthyosporea;Ichthyosphonida;Abeoformidae_Group_MAIP_1;Abeoformidae_Group_MAIP_1_X;Abeoformidae_Group_MAIP_1_X_sp_;
Otu02757	0.000319606	3.0625	EU333088_1_800_U	Eukaryota;Alveolata;Ciliophora;Spirotrichea;Choreotrichida;Strobilidiidae;Strobilidiidae_X;Strobilidiidae_X_sp_;
Otu02046	0.00219158	3.0557	AY485480_1_1703_U	Eukaryota;Stramenopiles;Ochrophyta;Bacillariophyta;Bacillariophyta_X;Radial-centric-basal-Coscinodiscophyceae;Rhizosolenia;Rhizosolenia_fallax;
Otu00677	0.00100448	3.03448	KJ759280_1_1798_U	Eukaryota;Alveolata;Dinoflagellata;Dinophyceae;Dinophyceae_X;Dinophyceae_XX;Dinophyceae_XXX;Dinophyceae_XXX_sp_;
Otu02044	0.000433751	3.03361	AB534338_1_1604_U	Eukaryota;Stramenopiles;Ochrophyta;Chrysophyceae;Chrysophyceae_X;Chrysophyceae_XX;Chrysophyceae_XXX;Chrysophyceae_XXX_sp_;
Otu02263	0.000205461	3	MF527278_1_1666_U	Eukaryota;Alveolata;Ciliophora;Spirotrichea;Choreotrichida;Strobilidiidae_I;Pelagostrobilidium;Pelagostrobilidium_sp_;
Otu01657	0.000136974	3	KJ925461_1_1505_U	Eukaryota;Alveolata;Dinoflagellata;Dinophyceae;Gymnodiniales;Gymnodiniaceae;Gyrodinium;Gyrodinium_sp_;
Otu00977	0.000136974	3	AB807623_1_1624_U	Eukaryota;Archaeplastida;Chlorophyta;Ulvophyceae;Cladophorales;Cladophorales_X;Chaetomorpha;Chaetomorpha_sp_;
Otu21015	6.8487e-05	3	AY664921_1_1754_U	Eukaryota;Alveolata;Dinoflagellata;Dinophyceae;Prorocentrales;Prorocentraceae;Prorocentrum;Prorocentrum_sp_;
Otu29499	6.8487e-05	3	KC488480_1_1694_U	Eukaryota;Alveolata;Dinoflagellata;Syndiniales;Dino-Group-II;Dino-Group-II-Clade-1;Dino-Group-II-Clade-1_X;Dino-Group-II-Clade-1_X_sp_;
Otu34789	6.8487e-05	3	KF130002_1_1751_U	Eukaryota;Alveolata;Dinoflagellata;Syndiniales;Dino-Group-II;Dino-Group-II-Clade-14;Dino-Group-II-Clade-14_X;Dino-Group-II-Clade-14_X_sp_;
Otu06557	6.8487e-05	3	EU793924_1_918_U	Eukaryota;Alveolata;Dinoflagellata;Syndiniales;Dino-Group-II;Dino-Group-II-Clade-4;Dino-Group-II-Clade-4_X;Dino-Group-II-Clade-4_X_sp_;
Otu31221	6.8487e-05	3	KJ763520_1_1810_U	Eukaryota;Stramenopiles;Opalozoa;MAST-3;MAST-3_X;MAST-3_XX;MAST-3_XXX;MAST-3_XXX_sp_;
Otu27758	6.8487e-05	3	AB973542_1_1658_U	Eukaryota;Stramenopiles;Sagenista;Labyrinthulomycetes;Oblongichytrida;Oblongichytridiaceae;Oblongichytrium;Oblongichytrium_sp_;
Otu02285	0.000410922	3	EU793707_1_1595_U	Eukaryota;Alveolata;Dinoflagellata;Syndiniales;Dino-Group-II;Dino-Group-II-Clade-27;Dino-Group-II-Clade-27_X;Dino-Group-II-Clade-27_X_sp_;
Otu01398	0.000136974	3	AY665059_1_1720_U	Eukaryota;Alveolata;Ciliophora;Oligohymenophorea;OLIGO5;OLIGO5_X;OLIGO5_XX;OLIGO5_XX_sp_;
Otu01559	0.000136974	3	EU333080_1_800_U	Eukaryota;Alveolata;Dinoflagellata;Dinophyceae;Dinophyceae_X;Dinophyceae_XX;Dinophyceae_XXX;Dinophyceae_XXX_sp_;
Otu01661	0.000136974	3	AY665065_1_1754_U	Eukaryota;Alveolata;Dinoflagellata;Dinophyceae;Dinophyceae_X;Dinophyceae_XX;Dinophyceae_XXX;Dinophyceae_XXX_sp_;
Otu01699	0.000136974	3	AM503930_1_1801_U	Eukaryota;Alveolata;Dinoflagellata;Dinophyceae;Gymnodiniales;Gymnodiniaceae;Gyrodinium;Gyrodinium_dominans;
Otu01260	0.000136974	3	EF527072_1_1343_U	Eukaryota;Alveolata;Dinoflagellata;Dinophyceae;Gymnodiniales;Warnowiaceae;Proterythropsis;Proterythropsis_sp_;
Otu08515	0.000136974	3	AB246744_1_1758_U	Eukaryota;Alveolata;Dinoflagellata;Dinophyceae;Peridiniales;Kryptoperidiniaceae;Blixaea;Blixaea_quinquecornis;
Otu01672	0.000136974	3	U37365_1_1796_U	Eukaryota;Alveolata;Dinoflagellata;Dinophyceae;Suessiales;Suessiaceae;Pelagodinium;Pelagodinium_beii;
Otu01929	0.000136974	3	KJ763267_1_1797_U	Eukaryota;Alveolata;Dinoflagellata;Dinophyceae;Suessiales;Suessiaceae;Pelagodinium;Pelagodinium_sp_;
Otu01969	0.000136974	3	KJ760745_1_1794_U	Eukaryota;Alveolata;Dinoflagellata;Syndiniales;Dino-Group-I;Dino-Group-I-Clade-1;Dino-Group-I-Clade-1_X;Dino-Group-I-Clade-1_X_sp_;
Otu02541	0.000136974	3	KC582886_1_1799_U	Eukaryota;Alveolata;Dinoflagellata;Syndiniales;Dino-Group-II;Dino-Group-II-Clade-10-and-11;Dino-Group-II-Clade-10-and-11_X;Dino-Group-II-Clade-10-and-11_X_sp_;
Otu01863	0.000136974	3	KJ762603_1_1796_U	Eukaryota;Alveolata;Dinoflagellata;Syndiniales;Dino-Group-II;Dino-Group-II-Clade-3;Dino-Group-II-Clade-3_X;Dino-Group-II-Clade-3_X_sp_;
Otu02018	0.000136974	3	AY208892_1_1818_U	Eukaryota;Alveolata;Dinoflagellata;Syndiniales;Dino-Group-II;Dino-Group-II-Clade-4;Amoebophrya;Amoebophrya_ceratii;
Otu01780	0.000136974	3	HQ394082_1_831_U	Eukaryota;Archaeplastida;Chlorophyta;Pyramimonadophyceae;Pyramimonadales;Pterospermaceae;Pterosperma;Pterosperma_sp_;
Otu01748	0.000136974	3	AM491021_1_1787_U	Eukaryota;Hacrobia;Haptophyta;Prymnesiophyceae;Prymnesiales;Chrysochromulinaceae;Chrysochromulina;Chrysochromulina_simplex;
Otu02491	0.000136974	3	AF054900_1_1715_U	Eukaryota;Opisthokonta;Fungi;Ascomycota;Pezizomycotina;Pezizomycetes;Mattirolomyces;Mattirolomyces_terfezioides;
Otu37187	0.000136974	3	AY885058_1_1178_U	Eukaryota;Rhizaria;Cercozoa;Filosa-Thecofilosea;Ebriida;Ebriida_X;Ebriida_XX;Ebriida_XX_sp_;
Otu01793	0.000136974	3	AB430609_1_1742_U	Eukaryota;Stramenopiles;Ochrophyta;Bacillariophyta;Bacillariophyta_X;Araphid-pennate;Striatella;Striatella_unipunctata;
Otu01813	0.000136974	3	AY789790_1_1185_U	Eukaryota;Stramenopiles;Opalozoa;Bicoecea;Bicoecales;Bicoecaceae;Bicoecaceae_X;Bicoecaceae_X_sp_;
Otu33866	6.8487e-05	3	FN598266_1_1052_U	Eukaryota;Alveolata;Ciliophora;Phyllopharyngea;Cyrtophoria_1;PHYLL_4;PHYLL_4_X;PHYLL_4_X_sp_;
Otu27732	6.8487e-05	3	EU793770_1_861_U	Eukaryota;Alveolata;Dinoflagellata;Syndiniales;Dino-Group-I;Dino-Group-I-Clade-5;Dino-Group-I-Clade-5_X;Dino-Group-I-Clade-5_X_sp_;
Otu19280	6.8487e-05	3	KF130519_1_1757_U	Eukaryota;Alveolata;Dinoflagellata;Syndiniales;Dino-Group-II;Dino-Group-II-Clade-10-and-11;Dino-Group-II-Clade-10-and-11_X;Dino-Group-II-Clade-10-and-11_X_sp_;
Otu01817	6.8487e-05	3	JN832735_1_1695_U	Eukaryota;Alveolata;Dinoflagellata;Syndiniales;Dino-Group-II;Dino-Group-II-Clade-26;Dino-Group-II-Clade-26_X;Dino-Group-II-Clade-26_X_sp_;
Otu02569	6.8487e-05	3	EU446389_1_1555_U	Eukaryota;Alveolata;Dinoflagellata;Syndiniales;Dino-Group-II;Dino-Group-II-Clade-4;Dino-Group-II-Clade-4_X;Dino-Group-II-Clade-4_X_sp_;
Otu02776	6.8487e-05	3	KF130491_1_1763_U	Eukaryota;Hacrobia;Picozoa;Picozoa_X;Picozoa_XX;Picozoa_XXX;Picozoa_XXXX;Picozoa_XXXX_sp_;
Otu37030	6.8487e-05	3	AY426842_1_1779_U	Eukaryota;Opisthokonta;Choanoflagellida;Choanoflagellatea;Craspedida;Monosigidae_Group_B;Monosigidae_Group_B_X;Monosigidae_Group_B_X_sp_;
Otu13255	6.8487e-05	3	FN690467_1_805_U	Eukaryota;Opisthokonta;Mesomycetozoa;Ichthyosporea;Ichthyosphonida;Abeoformidae_Group_MAIP_1;Abeoformidae_Group_MAIP_1_X;Abeoformidae_Group_MAIP_1_X_sp_;
Otu36866	6.8487e-05	3	KC309486_1_1644_U	Eukaryota;Stramenopiles;Ochrophyta;Bacillariophyta;Bacillariophyta_X;Polar-centric-Mediophyceae;Biddulphia;Biddulphia_reticulum;
Otu39281	6.8487e-05	3	AF109324_1_1676_U	Eukaryota;Stramenopiles;Ochrophyta;Chrysophyceae;Chrysophyceae_X;Chrysophyceae_Clade-F;Paraphysomonas;Paraphysomonas_imperforata;
Otu30128	6.8487e-05	3	JN832741_1_1033_U	Eukaryota;Stramenopiles;Pseudofungi;Hyphochytriomyceta;Hyphochytrydiales;Hyphochrytriaceae;Hyphochytrium;Hyphochytrium_sp_;
Otu01253	0.000639212	2.99237	EF527109_1_1755_U	Eukaryota;Alveolata;Dinoflagellata;Dinophyceae;Gonyaulacales;Ceratiaceae;Ceratium;Ceratium_sp_;
Otu01389	0.000570725	2.99043	AB721058_1_1657_U	Eukaryota;Stramenopiles;Ochrophyta;Bacillariophyta;Bacillariophyta_X;Raphid-pennate;Achnanthidium;Achnanthidium_sp_;
Otu01766	0.00865219	2.97375	KJ759535_1_1800_U	Eukaryota;Alveolata;Dinoflagellata;Dinophyceae;Dinophyceae_X;Dinophyceae_XX;Dinophyceae_XXX;Dinophyceae_XXX_sp_;
Otu00703	0.00675738	2.97044	JN832708_1_1770_U	Eukaryota;Alveolata;Dinoflagellata;Dinophyceae;Dinophyceae_X;Dinophyceae_XX;Dinophyceae_XXX;Dinophyceae_XXX_sp_;
Otu01363	0.00634646	2.96153	AB001287_1_1741_U	Eukaryota;Stramenopiles;Ochrophyta;Raphidophyceae;Raphidophyceae_X;Raphidophyceae_XX;Heterosigma;Heterosigma_akashiwo;
Otu01788	0.0010273	2.9562	KC488382_1_1651_U	Eukaryota;Alveolata;Ciliophora;Spirotrichea;Strombidiida;Strombidiidae_K;Strombidiidae_K_X;Strombidiidae_K_X_sp_;
Otu02671	0.000662041	2.95088	KJ761297_1_1788_U	Eukaryota;Alveolata;Dinoflagellata;Syndiniales;Dino-Group-I;Dino-Group-I-Clade-3;Dino-Group-I-Clade-3_X;Dino-Group-I-Clade-3_X_sp_;
Otu01685	0.000867502	2.94694	EU196418_1_1713_U	Eukaryota;Alveolata;Dinoflagellata;Dinophyceae;Prorocentrales;Prorocentraceae;Prorocentrum;Prorocentrum_emarginatum;
Otu22481	0.00155237	2.94148	JN871724_1_1755_U	Eukaryota;Alveolata;Ciliophora;Spirotrichea;Tintinnida;TIN_08;Tintinnopsis_08;Tintinnopsis_subacuta;
Otu01790	0.00022829	2.94118	AY664958_1_1754_U	Eukaryota;Alveolata;Dinoflagellata;Dinophyceae;Dinophyceae_X;Dinophyceae_XX;Dinophyceae_XXX;Dinophyceae_XXX_sp_;
Otu01975	0.00022829	2.94118	EF527085_1_1341_U	Eukaryota;Alveolata;Dinoflagellata;Dinophyceae;Dinophyceae_X;Dinophyceae_XX;Dinophyceae_XXX;Dinophyceae_XXX_sp_;
Otu02086	0.00022829	2.94118	KJ763451_1_1791_U	Eukaryota;Alveolata;Dinoflagellata;Dinophyceae;Dinophyceae_X;Dinophyceae_XX;Dinophyceae_XXX;Dinophyceae_XXX_sp_;
Otu00938	0.00022829	2.94118	KJ762561_1_1798_U	Eukaryota;Alveolata;Dinoflagellata;Syndiniales;Dino-Group-II;Dino-Group-II-Clade-1;Dino-Group-II-Clade-1_X;Dino-Group-II-Clade-1_X_sp_;
Otu02470	0.00022829	2.94118	EU143405_1_895_U	Eukaryota;Archaeplastida;Chlorophyta;Mamiellophyceae;Dolichomastigales;Dolichomastigaceae;Dolichomastix;Dolichomastix_tenuilepis;
Otu02157	0.00118711	2.93913	JF826384_1_1593_U	Eukaryota;Alveolata;Dinoflagellata;Syndiniales;Dino-Group-I;Dino-Group-I-Clade-4;Dino-Group-I-Clade-4_X;Dino-Group-I-Clade-4_X_sp_;
Otu02245	0.00223724	2.93341	KJ758406_1_1747_U	Eukaryota;Alveolata;Ciliophora;Spirotrichea;Choreotrichida;Leegaardiellidae_A;Leegaardiellidae_A_X;Leegaardiellidae_A_X_sp_;
Otu00666	0.00303626	2.92719	U27498_1_1798_U	Eukaryota;Alveolata;Dinoflagellata;Dinophyceae;Gonyaulacales;Goniodomataceae;Alexandrium;Alexandrium_margalefii;
Otu39771	0.00118711	2.92009	KF129832_1_1755_U	Eukaryota;Alveolata;Dinoflagellata;Syndiniales;Dino-Group-II;Dino-Group-II-Clade-1;Dino-Group-II-Clade-1_X;Dino-Group-II-Clade-1_X_sp_;
Otu00876	0.00235139	2.91376	JN680742_1_1771_U	Eukaryota;Alveolata;Ciliophora;Spirotrichea;Strombidiida;Tontoniidae_A;Tontoniidae_A_X;Tontoniidae_A_X_sp_;
Otu02234	0.00182632	2.91174	KT201577_1_1688_U	Eukaryota;Alveolata;Ciliophora;Oligohymenophorea;Peritrichia_2;Sessilida;Sessilida_X;Sessilida_X_sp_;
Otu01719	0.000182632	2.90909	KF130061_1_1763_U	Eukaryota;Hacrobia;Centroheliozoa;Centroheliozoa_X;Pterocystida;Pterocystida_X;Pterocystida_XX;Pterocystida_XX_sp_;
Otu01553	0.000182632	2.90909	JN832779_1_974_U	Eukaryota;Alveolata;Dinoflagellata;Syndiniales;Dino-Group-II;Dino-Group-II_X;Dino-Group-II_XX;Dino-Group-II_XX_sp_;
Otu01976	0.000182632	2.90909	KC488480_1_1694_U	Eukaryota;Alveolata;Dinoflagellata;Syndiniales;Dino-Group-II;Dino-Group-II-Clade-1;Dino-Group-II-Clade-1_X;Dino-Group-II-Clade-1_X_sp_;
Otu01348	0.000182632	2.90909	KJ759700_1_1787_U	Eukaryota;Alveolata;Dinoflagellata;Syndiniales;Dino-Group-II;Dino-Group-II-Clade-13;Dino-Group-II-Clade-13_X;Dino-Group-II-Clade-13_X_sp_;
Otu01511	0.000182632	2.90909	KJ763767_1_1798_U	Eukaryota;Alveolata;Dinoflagellata;Syndiniales;Dino-Group-II;Dino-Group-II-Clade-25;Dino-Group-II-Clade-25_X;Dino-Group-II-Clade-25_X_sp_;
Otu01279	0.000182632	2.90909	KF130224_1_1757_U	Eukaryota;Alveolata;Dinoflagellata;Syndiniales;Dino-Group-II;Dino-Group-II-Clade-3;Dino-Group-II-Clade-3_X;Dino-Group-II-Clade-3_X_sp_;
Otu01475	0.000182632	2.90909	EF432540_1_1702_U	Eukaryota;Opisthokonta;Choanoflagellida;Choanoflagellatea;Acanthoecida;Stephanoecidae_Group_E;Stephanoecidae_Group_E_X;Stephanoecidae_Group_E_X_sp_;
Otu01692	0.000182632	2.90909	KJ763099_1_1781_U	Eukaryota;Opisthokonta;Choanoflagellida;Choanoflagellatea;Acanthoecida;Stephanoecidae_Group_H;Stephanoecidae_Group_H_X;Stephanoecidae_Group_H_X_sp_;
Otu01607	0.000182632	2.90909	KC315815_1_1600_U	Eukaryota;Opisthokonta;Fungi;Cryptomycota;Cryptomycotina;Cryptomycotina_X;Cryptomycotina_XX;Cryptomycotina_XX_sp_;
Otu01694	0.000182632	2.90909	AB430602_1_1781_U	Eukaryota;Stramenopiles;Ochrophyta;Bacillariophyta;Bacillariophyta_X;Araphid-pennate;Rhaphoneis;Rhaphoneis_sp_;
Otu01467	0.000182632	2.90909	KC814811_1_1731_U	Eukaryota;Stramenopiles;Ochrophyta;Bacillariophyta;Bacillariophyta_X;Radial-centric-basal-Coscinodiscophyceae;Leptocylindrus;Leptocylindrus_convexus;
Otu34857	0.000182632	2.90909	KJ759496_1_1802_U	Eukaryota;Stramenopiles;Ochrophyta;Bolidophyceae;Parmales;Triparmaceae;Triparma;Triparma_mediterranea;
Otu01953	0.000753357	2.904	EU143529_1_906_U	Eukaryota;Archaeplastida;Chlorophyta;Pyramimonadophyceae;Pyramimonadales;Pterospermaceae;Pterosperma;Pterosperma_sp_;
Otu00712	0.00433751	2.90193	EU446389_1_1555_U	Eukaryota;Alveolata;Dinoflagellata;Syndiniales;Dino-Group-II;Dino-Group-II-Clade-4;Dino-Group-II-Clade-4_X;Dino-Group-II-Clade-4_X_sp_;
Otu40442	0.00178066	2.8999	JN832772_1_862_U	Eukaryota;Alveolata;Dinoflagellata;Syndiniales;Dino-Group-II;Dino-Group-II-Clade-26;Dino-Group-II-Clade-26_X;Dino-Group-II-Clade-26_X_sp_;
Otu01714	0.000890331	2.89714	GU072497_1_849_U	Eukaryota;Alveolata;Apicomplexa;Gregarinomorphea;Eugregarinorida;Eugregarinorida_EUG1;Eugregarinorida_EUG1_X;Eugregarinorida_EUG1_X_sp_;
Otu01014	0.00105013	2.88283	KJ763611_1_1765_U	Eukaryota;Alveolata;Ciliophora;Oligohymenophorea;OLIGO5;OLIGO5_X;OLIGO5_XX;OLIGO5_XX_sp_;
Otu02363	0.000159803	2.88235	AF472555_1_1812_U	Eukaryota;Alveolata;Dinoflagellata;Syndiniales;Dino-Group-II;Dino-Group-II-Clade-2;Dino-Group-II-Clade-2_X;Dino-Group-II-Clade-2_X_sp_;
Otu01877	0.000159803	2.88235	DQ103822_1_1560_U	Eukaryota;Opisthokonta;Choanoflagellida;Choanoflagellatea;Craspedida;Monosigidae_Group_M;Monosigidae_Group_M_X;Monosigidae_Group_M_X_sp_;
Otu18592	0.000319606	2.88235	KJ759637_1_1802_U	Eukaryota;Alveolata;Dinoflagellata;Dinophyceae;Dinophyceae_X;Dinophyceae_XX;Dinophyceae_XXX;Dinophyceae_XXX_sp_;
Otu01418	0.000159803	2.88235	KJ761900_1_1745_U	Eukaryota;Alveolata;Ciliophora;Spirotrichea;Choreotrichida;Leegaardiellidae_A;Leegaardiellidae_A_X;Leegaardiellidae_A_X_sp_;
Otu01506	0.000159803	2.88235	KJ762885_1_1759_U	Eukaryota;Alveolata;Ciliophora;Spirotrichea;Strombidiida;Strombidiidae_J;Strombidiidae_J_X;Strombidiidae_J_X_sp_;
Otu01768	0.000159803	2.88235	KJ758222_1_1798_U	Eukaryota;Alveolata;Dinoflagellata;Dinophyceae;Dinophyceae_X;Dinophyceae_XX;Dinophyceae_XXX;Dinophyceae_XXX_sp_;
Otu01823	0.000159803	2.88235	AM503930_1_1801_U	Eukaryota;Alveolata;Dinoflagellata;Dinophyceae;Gymnodiniales;Gymnodiniaceae;Gyrodinium;Gyrodinium_dominans;
Otu01291	0.000159803	2.88235	KJ763130_1_1797_U	Eukaryota;Alveolata;Dinoflagellata;Dinophyceae;Prorocentrales;Prorocentraceae;Prorocentrum;Prorocentrum_sp_;
Otu01379	0.000159803	2.88235	EU793274_1_1572_U	Eukaryota;Alveolata;Dinoflagellata;Syndiniales;Dino-Group-II;Dino-Group-II-Clade-1;Dino-Group-II-Clade-1_X;Dino-Group-II-Clade-1_X_sp_;
Otu01844	0.000159803	2.88235	KJ760349_1_1798_U	Eukaryota;Alveolata;Dinoflagellata;Syndiniales;Dino-Group-II;Dino-Group-II-Clade-1;Dino-Group-II-Clade-1_X;Dino-Group-II-Clade-1_X_sp_;
Otu01359	0.000159803	2.88235	EU793219_1_1532_U	Eukaryota;Alveolata;Dinoflagellata;Syndiniales;Dino-Group-II;Dino-Group-II-Clade-22;Dino-Group-II-Clade-22_X;Dino-Group-II-Clade-22_X_sp_;
Otu02672	0.000159803	2.88235	KJ759732_1_1797_U	Eukaryota;Alveolata;Dinoflagellata;Syndiniales;Dino-Group-II;Dino-Group-II-Clade-23;Dino-Group-II-Clade-23_X;Dino-Group-II-Clade-23_X_sp_;
Otu01861	0.000159803	2.88235	EU793417_1_1444_U	Eukaryota;Alveolata;Dinoflagellata;Syndiniales;Dino-Group-II;Dino-Group-II-Clade-6;Dino-Group-II-Clade-6_X;Dino-Group-II-Clade-6_X_sp_;
Otu01671	0.000159803	2.88235	AM491021_1_1787_U	Eukaryota;Hacrobia;Haptophyta;Prymnesiophyceae;Prymnesiales;Chrysochromulinaceae;Chrysochromulina;Chrysochromulina_simplex;
Otu02090	0.000159803	2.88235	KJ757092_1_1782_U	Eukaryota;Opisthokonta;Choanoflagellida;Choanoflagellatea;Acanthoecida;Stephanoecidae_Group_I;Stephanoecidae_Group_I_X;Stephanoecidae_Group_I_X_sp_;
Otu01779	0.000159803	2.88235	EF173001_1_1670_U	Eukaryota;Opisthokonta;Choanoflagellida;Choanoflagellida_X;Choanoflagellida_XX;Choanoflagellida_XX_Clade-3;Choanoflagellida_XX_Clade-3_X;Choanoflagellida_XX_Clade-3_X_sp_;
Otu01605	0.000159803	2.88235	AB246746_1_1727_U	Eukaryota;Stramenopiles;Ochrophyta;Bacillariophyta;Bacillariophyta_X;Polar-centric-Mediophyceae;Chaetoceros;Chaetoceros_sp_P__quinquecorne_endosymbiont;
Otu02215	0.000159803	2.88235	AY485514_1_1745_U	Eukaryota;Stramenopiles;Ochrophyta;Bacillariophyta;Bacillariophyta_X;Raphid-pennate;Pleurosigma;Pleurosigma_planktonicum;
Otu01616	0.000159803	2.88235	AY520445_1_1790_U	Eukaryota;Stramenopiles;Opalozoa;Bicoecea;Bicoecales;Bicoecaceae;Bicosoeca;Bicosoeca_vacillans;
Otu02228	0.000273948	2.88	AJ428100_1_1749_U	Eukaryota;Archaeplastida;Streptophyta;Zygnemophyceae;Zygnemophyceae_X;Zygnemophyceae_XX;Actinotaenium;Actinotaenium_curtum;
Otu01353	0.000821844	2.88	EU780634_1_1716_U	Eukaryota;Alveolata;Dinoflagellata;Dinophyceae;Peridiniales;Amphidomataceae;Azadinium;Azadinium_sp_;
Otu02088	0.000273948	2.88	FJ196072_1_1760_U	Eukaryota;Alveolata;Ciliophora;Spirotrichea;Tintinnida;Dictyocystidae;Codonellopsis;Codonellopsis_nipponica;
Otu01299	0.000273948	2.88	KJ757134_1_1800_U	Eukaryota;Alveolata;Dinoflagellata;Syndiniales;Dino-Group-II;Dino-Group-II-Clade-9;Dino-Group-II-Clade-9_X;Dino-Group-II-Clade-9_X_sp_;
Otu01273	0.000273948	2.88	FR874686_1_1785_U	Eukaryota;Stramenopiles;Ochrophyta;Chrysophyceae;Chrysophyceae_X;Chrysophyceae_Clade-H;Chrysophyceae_Clade-H_X;Chrysophyceae_Clade-H_X_sp_;
Otu00700	0.00438317	2.87685	KJ763927_1_1794_U	Eukaryota;Alveolata;Dinoflagellata;Syndiniales;Dino-Group-II;Dino-Group-II-Clade-1;Dino-Group-II-Clade-1_X;Dino-Group-II-Clade-1_X_sp_;
Otu01642	0.000776186	2.86139	AB195668_1_1740_U	Eukaryota;Alveolata;Dinoflagellata;Dinophyceae;Peridiniales;Kryptoperidiniaceae;Galeidinium;Galeidinium_rugatum;
Otu00565	0.00100448	2.85546	JN832708_1_1770_U	Eukaryota;Alveolata;Dinoflagellata;Dinophyceae;Dinophyceae_X;Dinophyceae_XX;Dinophyceae_XXX;Dinophyceae_XXX_sp_;
Otu01771	0.000502238	2.84706	KC488403_1_1691_U	Eukaryota;Alveolata;Dinoflagellata;Dinophyceae;Prorocentrales;Prorocentraceae;Prorocentrum;Prorocentrum_sp_;
Otu01803	0.000479409	2.84516	KJ763592_1_1800_U	Eukaryota;Alveolata;Dinoflagellata;Syndiniales;Dino-Group-II;Dino-Group-II-Clade-7;Dino-Group-II-Clade-7_X;Dino-Group-II-Clade-7_X_sp_;
Otu25775	0.000365264	2.84444	AB330055_1_1510_U	Eukaryota;Alveolata;Ciliophora;Phyllopharyngea;Cyrtophoria_1;PHYLL_4;PHYLL_4_X;PHYLL_4_X_sp_;
Otu34174	0.00105013	2.83646	JF791083_1_1777_U	Eukaryota;Alveolata;Dinoflagellata;Syndiniales;Dino-Group-II;Dino-Group-II-Clade-14;Dino-Group-II-Clade-14_X;Dino-Group-II-Clade-14_X_sp_;
Otu01195	0.00100448	2.82216	KF129651_1_1759_U	Eukaryota;Alveolata;Dinoflagellata;Syndiniales;Dino-Group-II;Dino-Group-II-Clade-16;Dino-Group-II-Clade-16_X;Dino-Group-II-Clade-16_X_sp_;
Otu01744	0.000251119	2.81395	KJ758222_1_1798_U	Eukaryota;Alveolata;Dinoflagellata;Dinophyceae;Dinophyceae_X;Dinophyceae_XX;Dinophyceae_XXX;Dinophyceae_XXX_sp_;
Otu01690	0.000251119	2.81395	KF130262_1_1761_U	Eukaryota;Alveolata;Dinoflagellata;Syndiniales;Dino-Group-II;Dino-Group-II-Clade-10-and-11;Dino-Group-II-Clade-10-and-11_X;Dino-Group-II-Clade-10-and-11_X_sp_;
Otu01786	0.000479409	2.80892	HQ912639_1_1625_U	Eukaryota;Stramenopiles;Ochrophyta;Bacillariophyta;Bacillariophyta_X;Araphid-pennate;Synedra;Synedra_fulgens;
Otu01686	0.0109579	2.79354	EF492494_1_1792_U	Eukaryota;Alveolata;Dinoflagellata;Dinophyceae;Peridiniales;Heterocapsaceae;Heterocapsa;Heterocapsa_sp_;
Otu01295	0.000410922	2.7931	AY208893_1_1819_U	Eukaryota;Alveolata;Dinoflagellata;Syndiniales;Dino-Group-II;Dino-Group-II-Clade-4;Amoebophrya;Amoebophrya_ceratii;
Otu01897	0.000205461	2.7931	KJ763074_1_1798_U	Eukaryota;Alveolata;Dinoflagellata;Dinophyceae;Dinophyceae_X;Dinophyceae_XX;Dinophyceae_XXX;Dinophyceae_XXX_sp_;
Otu02311	0.000205461	2.7931	AY664896_1_1755_U	Eukaryota;Alveolata;Dinoflagellata;Dinophyceae;Dinophyceae_X;Dinophyceae_XX;Dinophyceae_XXX;Dinophyceae_XXX_sp_;
Otu02644	0.000205461	2.7931	AF022192_1_1803_U	Eukaryota;Alveolata;Dinoflagellata;Dinophyceae;Gonyaulacales;Ceratiaceae;Tripos;Tripos_tenuis;
Otu01777	0.000205461	2.7931	AB120002_1_1725_U	Eukaryota;Alveolata;Dinoflagellata;Dinophyceae;Gymnodiniales;Gymnodiniaceae;Gyrodinium;Gyrodinium_spirale;
Otu01361	0.000205461	2.7931	DQ388461_1_1689_U	Eukaryota;Alveolata;Dinoflagellata;Noctilucophyceae;Noctilucales;Noctilucaceae;Noctiluca;Noctiluca_scintillans;
Otu01374	0.000205461	2.7931	KJ757056_1_1782_U	Eukaryota;Alveolata;Dinoflagellata;Syndiniales;Dino-Group-I;Dino-Group-I_X;Dino-Group-I_XX;Dino-Group-I_XX_sp_;
Otu01908	0.000205461	2.7931	EU793925_1_1594_U	Eukaryota;Alveolata;Dinoflagellata;Syndiniales;Dino-Group-II;Dino-Group-II-Clade-10-and-11;Dino-Group-II-Clade-10-and-11_X;Dino-Group-II-Clade-10-and-11_X_sp_;
Otu01674	0.000205461	2.7931	AY208893_1_1819_U	Eukaryota;Alveolata;Dinoflagellata;Syndiniales;Dino-Group-II;Dino-Group-II-Clade-4;Amoebophrya;Amoebophrya_ceratii;
Otu01967	0.000205461	2.7931	JQ226593_1_1612_U	Eukaryota;Alveolata;Dinoflagellata;Syndiniales;Dino-Group-II;Dino-Group-II-Clade-7;Dino-Group-II-Clade-7_X;Dino-Group-II-Clade-7_X_sp_;
Otu01717	0.000205461	2.7931	AB546736_1_1726_U	Eukaryota;Stramenopiles;Ochrophyta;Bacillariophyta;Bacillariophyta_X;Raphid-pennate;Epithemia;Epithemia_turgida;
Otu01841	0.000205461	2.7931	HM749950_1_1540_U	Eukaryota;Stramenopiles;Ochrophyta;Bolidophyceae;Parmales;Parmales_env_3;Parmales_env_3A;Parmales_env_3A_sp_;
Otu01465	0.000205461	2.7931	AY520445_1_1790_U	Eukaryota;Stramenopiles;Opalozoa;Bicoecea;Bicoecales;Bicoecaceae;Bicosoeca;Bicosoeca_vacillans;
Otu01284	0.00257968	2.78252	FR874483_1_1761_U	Eukaryota;Alveolata;Ciliophora;CONThreeP;CONThreeP_X;CONThreeP_XX;Askenasia;Askenasia_sp_;
Otu02229	0.000890331	2.78062	AY129052_1_1800_U	Eukaryota;Alveolata;Dinoflagellata;Syndiniales;Dino-Group-II;Dino-Group-II_X;Dino-Group-II-Clade-52_X;Dino-Group-II-Clade-52_X_sp_;
Otu10172	0.000114145	2.77778	LC025881_1_1676_U	Eukaryota;Alveolata;Dinoflagellata;Dinophyceae;Gymnodiniales;Gymnodiniaceae;Moestrupia;Moestrupia_oblonga;
Otu39361	0.000114145	2.77778	AY195983_1_1794_U	Eukaryota;Archaeplastida;Chlorophyta;Trebouxiophyceae;Chlorellales;Chlorellales_X;Nannochloris;Nannochloris_sp_;
Otu02558	0.000114145	2.77778	EU446341_1_1537_U	Eukaryota;Opisthokonta;Choanoflagellida;Choanoflagellatea;Acanthoecida;Stephanoecidae_Group_I;Stephanoecidae_Group_I_X;Stephanoecidae_Group_I_X_sp_;
Otu02279	0.000114145	2.77778	AY485514_1_1745_U	Eukaryota;Stramenopiles;Ochrophyta;Bacillariophyta;Bacillariophyta_X;Raphid-pennate;Pleurosigma;Pleurosigma_planktonicum;
Otu02653	0.000342435	2.77778	KJ763162_1_1755_U	Eukaryota;Alveolata;Ciliophora;Nassophorea;Nassophorea_X;Discotrichidae;NASSO_1;NASSO_1_sp_;
Otu01705	0.000342435	2.77778	KC488483_1_1710_U	Eukaryota;Alveolata;Dinoflagellata;Syndiniales;Dino-Group-II;Dino-Group-II-Clade-6;Dino-Group-II-Clade-6_X;Dino-Group-II-Clade-6_X_sp_;
Otu01619	0.00022829	2.77778	KJ761498_1_1799_U	Eukaryota;Alveolata;Dinoflagellata;Dinophyceae;Dinophyceae_X;Dinophyceae_XX;Dinophyceae_XXX;Dinophyceae_XXX_sp_;
Otu02564	0.000114145	2.77778	JF972028_1_526_U	Eukaryota;Alveolata;Chrompodellids;Colpodellidea;Colpodellida;Colpodellaceae;Voromonas;Voromonas_sp_;
Otu01358	0.000114145	2.77778	EU780618_1_1706_U	Eukaryota;Alveolata;Dinoflagellata;Dinophyceae;Dinophyceae_X;Dinophyceae_XX;Dinophyceae_XXX;Dinophyceae_XXX_sp_;
Otu01721	0.000114145	2.77778	EF173016_1_1674_U	Eukaryota;Alveolata;Dinoflagellata;Syndiniales;Dino-Group-II;Dino-Group-II-Clade-1;Dino-Group-II-Clade-1_X;Dino-Group-II-Clade-1_X_sp_;
Otu01940	0.000114145	2.77778	KC488512_1_1687_U	Eukaryota;Alveolata;Dinoflagellata;Syndiniales;Dino-Group-II;Dino-Group-II-Clade-10-and-11;Dino-Group-II-Clade-10-and-11_X;Dino-Group-II-Clade-10-and-11_X_sp_;
Otu18186	0.000114145	2.77778	KC488503_1_1685_U	Eukaryota;Alveolata;Dinoflagellata;Syndiniales;Dino-Group-II;Dino-Group-II-Clade-14;Dino-Group-II-Clade-14_X;Dino-Group-II-Clade-14_X_sp_;
Otu01809	0.000114145	2.77778	EU446389_1_1555_U	Eukaryota;Alveolata;Dinoflagellata;Syndiniales;Dino-Group-II;Dino-Group-II-Clade-4;Dino-Group-II-Clade-4_X;Dino-Group-II-Clade-4_X_sp_;
Otu01827	0.000114145	2.77778	EU333058_1_800_U	Eukaryota;Alveolata;Dinoflagellata;Syndiniales;Dino-Group-II;Dino-Group-II-Clade-5;Dino-Group-II-Clade-5_X;Dino-Group-II-Clade-5_X_sp_;
Otu01226	0.000114145	2.77778	EF432540_1_1702_U	Eukaryota;Opisthokonta;Choanoflagellida;Choanoflagellatea;Acanthoecida;Stephanoecidae_Group_E;Stephanoecidae_Group_E_X;Stephanoecidae_Group_E_X_sp_;
Otu02358	0.000114145	2.77778	AY426845_1_1789_U	Eukaryota;Opisthokonta;Choanoflagellida;Choanoflagellatea;Acanthoecida;Stephanoecidae_Group_E;Stephanoecidae_Group_E_X;Stephanoecidae_Group_E_X_sp_;
Otu02205	0.000114145	2.77778	AY485514_1_1745_U	Eukaryota;Stramenopiles;Ochrophyta;Bacillariophyta;Bacillariophyta_X;Raphid-pennate;Pleurosigma;Pleurosigma_planktonicum;
Otu02680	0.000114145	2.77778	JQ781893_1_1806_U	Eukaryota;Stramenopiles;Opalozoa;MAST-3;MAST-3C;MAST-3C_X;MAST-3C_XX;MAST-3C_XX_sp_;
Otu01737	0.000114145	2.77778	JQ781963_1_1804_U	Eukaryota;Stramenopiles;Opalozoa;MAST-3;MAST-3F;MAST-3F_X;MAST-3F_XX;MAST-3F_XX_sp_;
Otu03455	0.000114145	2.77778	KF129738_1_1746_U	Eukaryota;Stramenopiles;Opalozoa;MAST-3;MAST-3J;MAST-3J_X;MAST-3J_XX;MAST-3J_XX_sp_;
Otu01193	0.000296777	2.77049	AY664879_1_1754_U	Eukaryota;Alveolata;Dinoflagellata;Dinophyceae;Dinophyceae_X;Dinophyceae_XX;Dinophyceae_XXX;Dinophyceae_XXX_sp_;
Otu01599	0.000296777	2.77049	AB702985_1_1239_U	Eukaryota;Alveolata;Dinoflagellata;Dinophyceae;Peridiniales;Amphidiniopsidaceae;Archaeperidinium;Archaeperidinium_saanichi;
Otu01505	0.000296777	2.77049	KJ763782_1_1799_U	Eukaryota;Alveolata;Dinoflagellata;Syndiniales;Dino-Group-II;Dino-Group-II-Clade-26;Dino-Group-II-Clade-26_X;Dino-Group-II-Clade-26_X_sp_;
Otu02428	0.000296777	2.77049	KJ758938_1_1800_U	Eukaryota;Alveolata;Dinoflagellata;Syndiniales;Dino-Group-II;Dino-Group-II-Clade-4;Dino-Group-II-Clade-4_X;Dino-Group-II-Clade-4_X_sp_;
Otu01223	0.000547896	2.76923	KC487125_1_1653_U	Eukaryota;Alveolata;Chrompodellids;Colpodellidea;Colpodellida;Alphamonaceae;Alphamonadea_ALPH1;Alphamonadea_ALPH1_sp_;
Otu00736	0.00673455	2.75701	AY664887_1_1754_U	Eukaryota;Alveolata;Dinoflagellata;Dinophyceae;Dinophyceae_X;Dinophyceae_XX;Dinophyceae_XXX;Dinophyceae_XXX_sp_;
Otu00275	0.10805	2.74408	AY642698_1_1745_U	Eukaryota;Alveolata;Ciliophora;CONThreeP;CONThreeP_X;CONThreeP_XX;Askenasia;Askenasia_sp_;
Otu15022	0.000365264	2.7234	AB183668_1_1743_U	Eukaryota;Stramenopiles;Ochrophyta;Bacillariophyta;Bacillariophyta_X;Raphid-pennate;Nitzschia;Nitzschia_sp_;
Otu02041	0.00404073	2.72308	FN690467_1_805_U	Eukaryota;Opisthokonta;Mesomycetozoa;Ichthyosporea;Ichthyosphonida;Abeoformidae_Group_MAIP_1;Abeoformidae_Group_MAIP_1_X;Abeoformidae_Group_MAIP_1_X_sp_;
Otu01490	0.00100448	2.71148	DQ388462_1_1709_U	Eukaryota;Alveolata;Dinoflagellata;Dinophyceae;Gonyaulacales;Ceratiaceae;Tripos;Tripos_longipes;
Otu02482	0.000251119	2.68889	HQ219447_1_1746_U	Eukaryota;Hacrobia;Cryptophyta;Cryptophyceae;Cryptophyceae_X;Basal_Cryptophyceae-1;Basal_Cryptophyceae-1_X;Basal_Cryptophyceae-1_X_sp_;
Otu01682	0.000251119	2.68889	EU446389_1_1555_U	Eukaryota;Alveolata;Dinoflagellata;Syndiniales;Dino-Group-II;Dino-Group-II-Clade-4;Dino-Group-II-Clade-4_X;Dino-Group-II-Clade-4_X_sp_;
Otu12695	0.000251119	2.68889	AY485454_1_1756_U	Eukaryota;Stramenopiles;Ochrophyta;Bacillariophyta;Bacillariophyta_X;Raphid-pennate;Fistulifera;Fistulifera_pelliculosa;
Otu01760	0.000296777	2.68254	AY665065_1_1754_U	Eukaryota;Alveolata;Dinoflagellata;Dinophyceae;Dinophyceae_X;Dinophyceae_XX;Dinophyceae_XXX;Dinophyceae_XXX_sp_;
Otu02320	0.000182632	2.66667	FR874327_1_1747_U	Eukaryota;Alveolata;Ciliophora;Cyclotrichium_like_organism;Cyclotrichium_like_organism_X;Cyclotrichium_like_organism_XX;Cyclotrichium;Cyclotrichium_sp_;
Otu01673	0.000182632	2.66667	KF130396_1_1761_U	Eukaryota;Hacrobia;Haptophyta;Prymnesiophyceae;Calcihaptophycidae;Rhabdosphaeraceae;Algirosphaera;Algirosphaera_sp_;
Otu01513	0.000182632	2.66667	AB505557_1_1729_U	Eukaryota;Stramenopiles;Stramenopiles_X;Stramenopiles_XX;Stramenopiles_XXX;Stramenopiles_XXXX;Stramenopiles_XXXXX;Stramenopiles_XXXXX_sp_;
Otu02489	9.1316e-05	2.66667	AF521100_1_1753_U	Eukaryota;Alveolata;Dinoflagellata;Dinophyceae;Peridiniales;Podolampadaceae;Lessardia;Lessardia_elongata;
Otu02386	9.1316e-05	2.66667	EU793222_1_1462_U	Eukaryota;Alveolata;Dinoflagellata;Syndiniales;Dino-Group-II;Dino-Group-II-Clade-10-and-11;Dino-Group-II-Clade-10-and-11_X;Dino-Group-II-Clade-10-and-11_X_sp_;
Otu02052	9.1316e-05	2.66667	AY082975_1_2182_U	Eukaryota;Archaeplastida;Streptophyta;Zygnemophyceae;Zygnemophyceae_X;Zygnemophyceae_XX;Zygnemophyceae_XXX;Zygnemophyceae_XXX_sp_;
Otu01585	9.1316e-05	2.66667	KJ668051_1_1773_U	Eukaryota;Opisthokonta;Fungi;Chytridiomycota;Chytridiomycotina;Monoblepharidomycetes;Harpochytrium;Harpochytrium_sp_;
Otu02397	9.1316e-05	2.66667	FJ176713_1_1774_U	Eukaryota;Rhizaria;Cercozoa;Filosa-Sarcomonadea;Glissomonadida;Allapsidae;Allapsa;Allapsa_sp_;
Otu02754	9.1316e-05	2.66667	AM501970_1_1745_U	Eukaryota;Stramenopiles;Ochrophyta;Bacillariophyta;Bacillariophyta_X;Raphid-pennate;Navicula;Navicula_cryptocephala_var__veneta;
Otu02448	9.1316e-05	2.66667	AB022105_1_1621_U	Eukaryota;Stramenopiles;Sagenista;Labyrinthulomycetes;Labyrinthulida;Labyrinthulaceae;Labyrinthula;Labyrinthula_sp_;
Otu01796	0.000273948	2.66667	EU333058_1_800_U	Eukaryota;Alveolata;Dinoflagellata;Syndiniales;Dino-Group-II;Dino-Group-II-Clade-5;Dino-Group-II-Clade-5_X;Dino-Group-II-Clade-5_X_sp_;
Otu01667	0.000182632	2.66667	EU333088_1_800_U	Eukaryota;Alveolata;Ciliophora;Spirotrichea;Choreotrichida;Strobilidiidae;Strobilidiidae_X;Strobilidiidae_X_sp_;
Otu01378	0.000182632	2.66667	KF130565_1_1758_U	Eukaryota;Alveolata;Dinoflagellata;Dinophyceae;Dinophyceae_X;Dinophyceae_XX;Dinophyceae_XXX;Dinophyceae_XXX_sp_;
Otu01590	0.000182632	2.66667	KJ759505_1_1794_U	Eukaryota;Alveolata;Dinoflagellata;Dinophyceae;Dinophyceae_X;Dinophyceae_XX;Dinophyceae_XXX;Dinophyceae_XXX_sp_;
Otu01709	0.000182632	2.66667	KJ758295_1_1799_U	Eukaryota;Alveolata;Dinoflagellata;Dinophyceae;Dinophyceae_X;Dinophyceae_XX;Dinophyceae_XXX;Dinophyceae_XXX_sp_;
Otu01668	0.000182632	2.66667	KJ762603_1_1796_U	Eukaryota;Alveolata;Dinoflagellata;Syndiniales;Dino-Group-II;Dino-Group-II-Clade-3;Dino-Group-II-Clade-3_X;Dino-Group-II-Clade-3_X_sp_;
Otu01400	0.000182632	2.66667	EU793919_1_1492_U	Eukaryota;Alveolata;Dinoflagellata;Syndiniales;Dino-Group-II;Dino-Group-II-Clade-8;Dino-Group-II-Clade-8_X;Dino-Group-II-Clade-8_X_sp_;
Otu02540	9.1316e-05	2.66667	KC488363_1_1629_U	Eukaryota;Alveolata;Ciliophora;Nassophorea;Nassophorea_X;Discotrichidae;NASSO_1;NASSO_1_sp_;
Otu02464	9.1316e-05	2.66667	AY665065_1_1754_U	Eukaryota;Alveolata;Dinoflagellata;Dinophyceae;Dinophyceae_X;Dinophyceae_XX;Dinophyceae_XXX;Dinophyceae_XXX_sp_;
Otu02542	9.1316e-05	2.66667	KC488420_1_1693_U	Eukaryota;Alveolata;Dinoflagellata;Dinophyceae;Dinophyceae_X;Dinophyceae_XX;Dinophyceae_XXX;Dinophyceae_XXX_sp_;
Otu02616	9.1316e-05	2.66667	KJ762832_1_1801_U	Eukaryota;Alveolata;Dinoflagellata;Dinophyceae;Dinophyceae_X;Dinophyceae_XX;Dinophyceae_XXX;Dinophyceae_XXX_sp_;
Otu02660	9.1316e-05	2.66667	EU793923_1_925_U	Eukaryota;Alveolata;Dinoflagellata;Dinophyceae;Dinophyceae_X;Dinophyceae_XX;Dinophyceae_XXX;Dinophyceae_XXX_sp_;
Otu01722	9.1316e-05	2.66667	KJ762951_1_1798_U	Eukaryota;Alveolata;Dinoflagellata;Dinophyceae;Gymnodiniales;Gymnodiniaceae;Gymnodinium;Gymnodinium_sp_;
Otu27549	9.1316e-05	2.66667	AB686255_1_1713_U	Eukaryota;Alveolata;Dinoflagellata;Dinophyceae;Gymnodiniales;Gymnodiniaceae;Lepidodinium;Lepidodinium_sp_;
Otu02051	9.1316e-05	2.66667	AF272045_1_1789_U	Eukaryota;Alveolata;Dinoflagellata;Dinophyceae;Gymnodiniales;Kareniaceae;Karlodinium;Karlodinium_veneficum;
Otu02276	9.1316e-05	2.66667	AB183674_1_1756_U	Eukaryota;Alveolata;Dinoflagellata;Dinophyceae;Peridiniales;Thoracosphaeraceae;Scrippsiella;Scrippsiella_sp_;
Otu01588	9.1316e-05	2.66667	AY664921_1_1754_U	Eukaryota;Alveolata;Dinoflagellata;Dinophyceae;Prorocentrales;Prorocentraceae;Prorocentrum;Prorocentrum_sp_;
Otu02545	9.1316e-05	2.66667	KJ762853_1_1800_U	Eukaryota;Alveolata;Dinoflagellata;Dinophyceae;Prorocentrales;Prorocentraceae;Prorocentrum;Prorocentrum_sp_;
Otu02458	9.1316e-05	2.66667	DQ388461_1_1689_U	Eukaryota;Alveolata;Dinoflagellata;Noctilucophyceae;Noctilucales;Noctilucaceae;Noctiluca;Noctiluca_scintillans;
Otu26139	9.1316e-05	2.66667	KJ757929_1_1800_U	Eukaryota;Alveolata;Dinoflagellata;Syndiniales;Dino-Group-II;Dino-Group-II-Clade-10-and-11;Dino-Group-II-Clade-10-and-11_X;Dino-Group-II-Clade-10-and-11_X_sp_;
Otu02651	9.1316e-05	2.66667	AF290075_1_1671_U	Eukaryota;Alveolata;Dinoflagellata;Syndiniales;Dino-Group-II;Dino-Group-II-Clade-14;Dino-Group-II-Clade-14_X;Dino-Group-II-Clade-14_X_sp_;
Otu12816	9.1316e-05	2.66667	JN832769_1_927_U	Eukaryota;Alveolata;Dinoflagellata;Syndiniales;Dino-Group-II;Dino-Group-II-Clade-14;Dino-Group-II-Clade-14_X;Dino-Group-II-Clade-14_X_sp_;
Otu02309	9.1316e-05	2.66667	KJ762603_1_1796_U	Eukaryota;Alveolata;Dinoflagellata;Syndiniales;Dino-Group-II;Dino-Group-II-Clade-3;Dino-Group-II-Clade-3_X;Dino-Group-II-Clade-3_X_sp_;
Otu33556	9.1316e-05	2.66667	KJ762603_1_1796_U	Eukaryota;Alveolata;Dinoflagellata;Syndiniales;Dino-Group-II;Dino-Group-II-Clade-3;Dino-Group-II-Clade-3_X;Dino-Group-II-Clade-3_X_sp_;
Otu02203	9.1316e-05	2.66667	KJ763188_1_1799_U	Eukaryota;Hacrobia;Haptophyta;Prymnesiophyceae;Prymnesiales;Prymnesiaceae;Haptolina;Haptolina_sp_;
Otu02034	9.1316e-05	2.66667	HQ394014_1_865_U	Eukaryota;Hacrobia;Picozoa;Picozoa_X;Picozoa_XX;Picozoa_XXX;Picozoa_XXXX;Picozoa_XXXX_sp_;
Otu02081	9.1316e-05	2.66667	GQ365815_1_1537_U	Eukaryota;Hacrobia;Telonemia;Telonemia_X;Telonemia_XX;Telonemia-Group-1;Telonemia-Group-1_X;Telonemia-Group-1_X_sp_;
Otu02683	9.1316e-05	2.66667	EF432540_1_1702_U	Eukaryota;Opisthokonta;Choanoflagellida;Choanoflagellatea;Acanthoecida;Stephanoecidae_Group_E;Stephanoecidae_Group_E_X;Stephanoecidae_Group_E_X_sp_;
Otu01964	9.1316e-05	2.66667	KF130554_1_1742_U	Eukaryota;Opisthokonta;Choanoflagellida;Choanoflagellatea;Craspedida;Monosigidae_Group_B;Monosigidae_Group_B_X;Monosigidae_Group_B_X_sp_;
Otu02321	9.1316e-05	2.66667	JQ226527_1_1594_U	Eukaryota;Opisthokonta;Choanoflagellida;Choanoflagellida_X;Choanoflagellida_XX;Choanoflagellida_XX_Clade-3;Choanoflagellida_XX_Clade-3_X;Choanoflagellida_XX_Clade-3_X_sp_;
Otu02775	9.1316e-05	2.66667	AB191419_1_1704_U	Eukaryota;Stramenopiles;Ochrophyta;Bacillariophyta;Bacillariophyta_X;Polar-centric-Mediophyceae;Skeletonema;Skeletonema_marinoi;
Otu02291	9.1316e-05	2.66667	AY485514_1_1745_U	Eukaryota;Stramenopiles;Ochrophyta;Bacillariophyta;Bacillariophyta_X;Raphid-pennate;Pleurosigma;Pleurosigma_planktonicum;
Otu01791	9.1316e-05	2.66667	HQ219364_1_1769_U	Eukaryota;Stramenopiles;Opalozoa;MAST-12;MAST-12A;MAST-12A_X;MAST-12A_XX;MAST-12A_XX_sp_;
Otu02435	9.1316e-05	2.66667	AY116221_1_1791_U	Eukaryota;Stramenopiles;Opalozoa;MAST-3;MAST-3J;MAST-3J_X;MAST-3J_XX;MAST-3J_XX_sp_;
Otu02039	9.1316e-05	2.66667	JQ223262_1_1636_U	Eukaryota;Stramenopiles;Pseudofungi;MAST-1;MAST-1C;MAST-1C_X;MAST-1C_XX;MAST-1C_XX_sp_;
Otu02547	9.1316e-05	2.66667	AJ402350_1_1758_U	Eukaryota;Stramenopiles;Pseudofungi;MAST-1;MAST-1D;MAST-1D_X;MAST-1D_XX;MAST-1D_XX_sp_;
Otu02739	9.1316e-05	2.66667	FJ153754_1_1787_U	Eukaryota;Stramenopiles;Sagenista;Labyrinthulomycetes;Labyrinthulida;Labyrinthulaceae;Labyrinthulaceae_ANT10_3;Labyrinthulaceae_ANT10_3_sp_;
Otu01632	0.00625515	2.648	KF130173_1_1756_U	Eukaryota;Alveolata;Dinoflagellata;Syndiniales;Dino-Group-I;Dino-Group-I-Clade-2;Dino-Group-I-Clade-2_X;Dino-Group-I-Clade-2_X_sp_;
Otu01653	0.000342435	2.64706	EF172969_1_1672_U	Eukaryota;Alveolata;Dinoflagellata;Syndiniales;Dino-Group-II;Dino-Group-II-Clade-6;Dino-Group-II-Clade-6_X;Dino-Group-II-Clade-6_X_sp_;
Otu01189	0.000844673	2.63776	KJ762888_1_1800_U	Eukaryota;Alveolata;Dinoflagellata;Dinophyceae;Gonyaulacales;Ceratiaceae;Tripos;Tripos_furca;
Otu40107	0.00198612	2.63636	KJ763451_1_1791_U	Eukaryota;Alveolata;Dinoflagellata;Dinophyceae;Dinophyceae_X;Dinophyceae_XX;Dinophyceae_XXX;Dinophyceae_XXX_sp_;
Otu01612	0.00022829	2.63158	KF129845_1_1752_U	Eukaryota;Alveolata;Dinoflagellata;Syndiniales;Dino-Group-II;Dino-Group-II-Clade-14;Dino-Group-II-Clade-14_X;Dino-Group-II-Clade-14_X_sp_;
Otu38878	0.00022829	2.63158	KJ759019_1_1800_U	Eukaryota;Alveolata;Dinoflagellata;Syndiniales;Dino-Group-III;Dino-Group-III_X;Dino-Group-III_XX;Dino-Group-III_XX_sp_;
Otu01660	0.00022829	2.63158	DQ060524_1_1778_U	Eukaryota;Hacrobia;Picozoa;Picozoa_X;Picozoa_XX;Picozoa_XXX;Picozoa_XXXX;Picozoa_XXXX_sp_;
Otu01889	0.00022829	2.63158	KC671301_1_1748_U	Eukaryota;Opisthokonta;Fungi;Basidiomycota;Ustilaginomycotina;Exobasidiomycetes;Malassezia;Malassezia_sympodialis;
Otu01409	0.000981647	2.63016	KC753486_1_1650_U	Eukaryota;Alveolata;Ciliophora;Phyllopharyngea;Cyrtophoria_2;Lynchellidae_1;Chlamydonella;Chlamydonella_irregularis;
Otu00617	0.00105013	2.62531	EU446389_1_1555_U	Eukaryota;Alveolata;Dinoflagellata;Syndiniales;Dino-Group-II;Dino-Group-II-Clade-4;Dino-Group-II-Clade-4_X;Dino-Group-II-Clade-4_X_sp_;
Otu01643	0.0014154	2.6221	KJ763465_1_1596_U	Eukaryota;Alveolata;Ciliophora;Ciliophora_X;Ciliophora_XX;Ciliophora_XXX;Mesodinium;Mesodinium_sp_;
Otu01493	0.000479409	2.60947	JN832761_1_965_U	Eukaryota;Alveolata;Dinoflagellata;Dinophyceae;Dinophyceae_X;Dinophyceae_XX;Dinophyceae_XXX;Dinophyceae_XXX_sp_;
Otu01262	0.00383527	2.60465	KJ925430_1_1689_U	Eukaryota;Alveolata;Dinoflagellata;Dinophyceae;Dinophyceae_X;Dinophyceae_XX;Dinophyceae_XXX;Dinophyceae_XXX_sp_;
Otu02810	0.000502238	2.60215	FN598266_1_1052_U	Eukaryota;Alveolata;Ciliophora;Phyllopharyngea;Cyrtophoria_1;PHYLL_4;PHYLL_4_X;PHYLL_4_X_sp_;
Otu01645	0.000502238	2.60215	AJ495815_1_1796_U	Eukaryota;Opisthokonta;Fungi;Ascomycota;Taphrinomycotina;Taphrinomycetes;Taphrina;Taphrina_pruni;
Otu00846	0.000296777	2.6	KC582893_1_1795_U	Eukaryota;Alveolata;Dinoflagellata;Syndiniales;Dino-Group-II;Dino-Group-II-Clade-22;Dino-Group-II-Clade-22_X;Dino-Group-II-Clade-22_X_sp_;
Otu01486	0.000433751	2.59712	KJ925274_1_1690_U	Eukaryota;Alveolata;Dinoflagellata;Dinophyceae;Dinophyceae_X;Dinophyceae_XX;Dinophyceae_XXX;Dinophyceae_XXX_sp_;
Otu00625	0.00719113	2.59107	FN690467_1_805_U	Eukaryota;Opisthokonta;Mesomycetozoa;Ichthyosporea;Ichthyosphonida;Abeoformidae_Group_MAIP_1;Abeoformidae_Group_MAIP_1_X;Abeoformidae_Group_MAIP_1_X_sp_;
Otu01122	0.0197927	2.58788	AY143572_1_1760_U	Eukaryota;Alveolata;Ciliophora;Spirotrichea;Tintinnida;Favellidae;Favella;Favella_panamensis;
Otu11402	0.000159803	2.57895	U41086_1_1797_U	Eukaryota;Alveolata;Dinoflagellata;Dinophyceae;Suessiales;Suessiaceae;Protodinium;Protodinium_simplex;
Otu01951	0.000159803	2.57895	EU793924_1_918_U	Eukaryota;Alveolata;Dinoflagellata;Syndiniales;Dino-Group-II;Dino-Group-II-Clade-4;Dino-Group-II-Clade-4_X;Dino-Group-II-Clade-4_X_sp_;
Otu01883	0.000159803	2.57895	EU793011_1_922_U	Eukaryota;Alveolata;Dinoflagellata;Syndiniales;Dino-Group-V;Dino-Group-V_X;Dino-Group-V_XX;Dino-Group-V_XX_sp_;
Otu01598	0.000159803	2.57895	KC771150_1_1790_U	Eukaryota;Stramenopiles;Ochrophyta;Bacillariophyta;Bacillariophyta_X;Raphid-pennate;Pleurosigma;Pleurosigma_intermedium;
Otu35121	0.000251119	2.57447	KJ761278_1_1800_U	Eukaryota;Alveolata;Dinoflagellata;Syndiniales;Dino-Group-II;Dino-Group-II_X;Dino-Group-II_XX;Dino-Group-II_XX_sp_;
Otu31323	0.000273948	2.57143	AY665021_1_1747_U	Eukaryota;Alveolata;Dinoflagellata;Syndiniales;Dino-Group-I;Dino-Group-I-Clade-1;Dino-Group-I-Clade-1_X;Dino-Group-I-Clade-1_X_sp_;
Otu02099	0.000136974	2.57143	KC851782_1_559_U	Eukaryota;Alveolata;Ciliophora;CONTH_6;CONTH_6_X;CONTH_6_XX;CONTH_6_XXX;CONTH_6_XXX_sp_;
Otu02575	0.000136974	2.57143	KJ762860_1_1802_U	Eukaryota;Alveolata;Dinoflagellata;Dinophyceae;Dinophyceae_X;Dinophyceae_XX;Dinophyceae_XXX;Dinophyceae_XXX_sp_;
Otu40921	0.000136974	2.57143	HM581707_1_1797_U	Eukaryota;Alveolata;Dinoflagellata;Dinophyceae;Dinophyceae_X;Dinophyceae_XX;Dinophyceae_XXX;Dinophyceae_XXX_sp_;
Otu01684	0.000136974	2.57143	DQ388462_1_1709_U	Eukaryota;Alveolata;Dinoflagellata;Dinophyceae;Gonyaulacales;Ceratiaceae;Tripos;Tripos_longipes;
Otu02655	0.000136974	2.57143	AB686255_1_1713_U	Eukaryota;Alveolata;Dinoflagellata;Dinophyceae;Gymnodiniales;Gymnodiniaceae;Lepidodinium;Lepidodinium_sp_;
Otu26323	0.000136974	2.57143	GQ483674_1_817_U	Eukaryota;Alveolata;Dinoflagellata;Dinophyceae;Suessiales;Suessiaceae;Suessiaceae_X;Suessiaceae_X_sp_;
Otu01945	0.000136974	2.57143	KJ757056_1_1782_U	Eukaryota;Alveolata;Dinoflagellata;Syndiniales;Dino-Group-I;Dino-Group-I_X;Dino-Group-I_XX;Dino-Group-I_XX_sp_;
Otu22186	0.000136974	2.57143	KJ762603_1_1796_U	Eukaryota;Alveolata;Dinoflagellata;Syndiniales;Dino-Group-II;Dino-Group-II-Clade-3;Dino-Group-II-Clade-3_X;Dino-Group-II-Clade-3_X_sp_;
Otu02682	0.000136974	2.57143	KJ759623_1_1791_U	Eukaryota;Hacrobia;Picozoa;Picozoa_X;Picozoa_XX;Picozoa_XXX;Picozoa_XXXX;Picozoa_XXXX_sp_;
Otu01821	0.000136974	2.57143	AF548107_1_1695_U	Eukaryota;Opisthokonta;Fungi;Basidiomycota;Wallemiomycetes;Wallemiales;Wallemia;Wallemia_sebi;
Otu02919	0.000136974	2.57143	FJ032657_1_1658_U	Eukaryota;Stramenopiles;Ochrophyta;Bolidophyceae;Parmales;Parmales_env_1;Parmales_env_1_X;Parmales_env_1_X_sp_;
Otu26638	0.00146106	2.56964	KJ763551_1_1799_U	Eukaryota;Alveolata;Dinoflagellata;Syndiniales;Dino-Group-II;Dino-Group-II-Clade-10-and-11;Dino-Group-II-Clade-10-and-11_X;Dino-Group-II-Clade-10-and-11_X_sp_;
Otu01203	0.00310474	2.56889	KJ759710_1_1803_U	Eukaryota;Alveolata;Dinoflagellata;Dinophyceae;Dinophyceae_X;Dinophyceae_XX;Dinophyceae_XXX;Dinophyceae_XXX_sp_;
Otu01219	0.000662041	2.55623	EU793833_1_1658_U	Eukaryota;Alveolata;Dinoflagellata;Syndiniales;Dino-Group-I;Dino-Group-I-Clade-5;Dino-Group-I-Clade-5_X;Dino-Group-I-Clade-5_X_sp_;
Otu00959	0.00152954	2.55202	KJ761276_1_1778_U	Eukaryota;Alveolata;Ciliophora;Spirotrichea;Strombidiida;Strombidiida_X;Strombidiida_XX;Strombidiida_XX_sp_;
Otu01404	0.000502238	2.54737	KJ763671_1_1796_U	Eukaryota;Alveolata;Dinoflagellata;Syndiniales;Dino-Group-II;Dino-Group-II-Clade-1;Dino-Group-II-Clade-1_X;Dino-Group-II-Clade-1_X_sp_;
Otu01267	0.000799015	2.54678	KC582938_1_1795_U	Eukaryota;Alveolata;Dinoflagellata;Syndiniales;Dino-Group-II;Dino-Group-II-Clade-22;Dino-Group-II-Clade-22_X;Dino-Group-II-Clade-22_X_sp_;
Otu02037	0.00068487	2.54237	FN598298_1_1137_U	Eukaryota;Alveolata;Dinoflagellata;Dinophyceae;Dinophyceae_X;Dinophyceae_XX;Dinophyceae_XXX;Dinophyceae_XXX_sp_;
Otu26797	0.00100448	2.54068	KJ763944_1_1802_U	Eukaryota;Alveolata;Dinoflagellata;Syndiniales;Dino-Group-II;Dino-Group-II-Clade-26;Dino-Group-II-Clade-26_X;Dino-Group-II-Clade-26_X_sp_;
Otu00334	0.0686925	2.53909	DQ146403_1_1780_U	Eukaryota;Alveolata;Dinoflagellata;Syndiniales;Dino-Group-IV;Dino-Group-IV-Syndinium-Group;Syndinium;Syndinium_turbo;
Otu01168	0.00203178	2.53797	KJ762603_1_1796_U	Eukaryota;Alveolata;Dinoflagellata;Syndiniales;Dino-Group-II;Dino-Group-II-Clade-3;Dino-Group-II-Clade-3_X;Dino-Group-II-Clade-3_X_sp_;
Otu01318	0.0160944	2.52624	LC054926_1_1764_U	Eukaryota;Alveolata;Dinoflagellata;Dinophyceae;Peridiniales;Kryptoperidiniaceae;Durinskia;Durinskia_dybowskii;
Otu01303	0.000388093	2.51304	KJ757457_1_1800_U	Eukaryota;Alveolata;Dinoflagellata;Syndiniales;Dino-Group-II;Dino-Group-II-Clade-12;Dino-Group-II-Clade-12_X;Dino-Group-II-Clade-12_X_sp_;
Otu01899	0.000319606	2.51282	KJ757643_1_1805_U	Eukaryota;Stramenopiles;Sagenista;MAST-8;MAST-8A;MAST-8A_X;MAST-8A_XX;MAST-8A_XX_sp_;
Otu33055	0.00351567	2.49065	KJ757056_1_1782_U	Eukaryota;Alveolata;Dinoflagellata;Syndiniales;Dino-Group-I;Dino-Group-I_X;Dino-Group-I_XX;Dino-Group-I_XX_sp_;
Otu02172	0.000273948	2.48276	AY050182_1_1804_U	Eukaryota;Apusozoa;Apusomonadidae;Apusomonadidae_Group-1;Apusomonadidae_Group-1_X;Apusomonadidae_Group-1_XX;Amastigomonas;Amastigomonas_mutabilis;
Otu00586	0.00260251	2.47543	KC583005_1_1808_U	Eukaryota;Stramenopiles;Opalozoa;MAST-12;MAST-12A;MAST-12A_X;MAST-12A_XX;MAST-12A_XX_sp_;
Otu01117	0.00187198	2.47024	FN690467_1_805_U	Eukaryota;Opisthokonta;Mesomycetozoa;Ichthyosporea;Ichthyosphonida;Abeoformidae_Group_MAIP_1;Abeoformidae_Group_MAIP_1_X;Abeoformidae_Group_MAIP_1_X_sp_;
Otu01888	0.000251119	2.46939	AB284576_1_1789_U	Eukaryota;Stramenopiles;Pseudofungi;Oomycota;Oomycota_X;Haliphthorales;Halocrusticida;Halocrusticida_parasitica;
Otu02813	0.00127842	2.46929	AJ415510_1_1753_U	Eukaryota;Alveolata;Dinoflagellata;Dinophyceae;Gonyaulacales;Goniodomataceae;Alexandrium;Alexandrium_tamarense;
Otu31469	0.000662041	2.46628	AY485487_1_1708_U	Eukaryota;Stramenopiles;Ochrophyta;Bacillariophyta;Bacillariophyta_X;Radial-centric-basal-Coscinodiscophyceae;Guinardia;Guinardia_delicatula;
Otu02677	0.000182632	2.46154	KF129990_1_1759_U	Eukaryota;Alveolata;Dinoflagellata;Dinophyceae;Dinophyceae_X;Dinophyceae_XX;Dinophyceae_XXX;Dinophyceae_XXX_sp_;
Otu02676	0.000182632	2.46154	GQ995383_1_1774_U	Eukaryota;Opisthokonta;Fungi;Chytridiomycota;Chytridiomycotina;Chytridiomycetes;Spizellomycetales-and-Rhizophlyctidales;Spizellomycetales-and-Rhizophlyctidales_sp_;
Otu01651	0.000182632	2.46154	GU479651_1_1549_U	Eukaryota;Alveolata;Apicomplexa;Coccidiomorphea;Eimeriida;Eimeriidae;Goussia5;Goussia5_pannonica;
Otu02168	0.000182632	2.46154	JF972028_1_526_U	Eukaryota;Alveolata;Chrompodellids;Colpodellidea;Colpodellida;Colpodellaceae;Voromonas;Voromonas_sp_;
Otu01307	0.000182632	2.46154	KJ759323_1_1791_U	Eukaryota;Alveolata;Dinoflagellata;Dinophyceae;Dinophyceae_X;Dinophyceae_XX;Dinophyceae_XXX;Dinophyceae_XXX_sp_;
Otu02427	0.000182632	2.46154	KF130359_1_1759_U	Eukaryota;Alveolata;Dinoflagellata;Dinophyceae;Dinophyceae_X;Dinophyceae_XX;Dinophyceae_XXX;Dinophyceae_XXX_sp_;
Otu01794	0.000182632	2.46154	KC488480_1_1694_U	Eukaryota;Alveolata;Dinoflagellata;Syndiniales;Dino-Group-II;Dino-Group-II-Clade-1;Dino-Group-II-Clade-1_X;Dino-Group-II-Clade-1_X_sp_;
Otu01855	0.0040179	2.45997	KJ759359_1_1776_U	Eukaryota;Alveolata;Dinoflagellata;Dinophyceae;Dinophyceae_X;Dinophyceae_XX;Dinophyceae_XXX;Dinophyceae_XXX_sp_;
Otu01670	0.00483975	2.45569	DQ177357_1_562_U	Eukaryota;Alveolata;Ciliophora;Oligohymenophorea;Apostomatia;Apostomatia_X;Apostomatia_XX;Apostomatia_XX_sp_;
Otu01625	0.000205461	2.45455	KJ761446_1_1782_U	Eukaryota;Alveolata;Dinoflagellata;Syndiniales;Dino-Group-I;Dino-Group-I-Clade-3;Dino-Group-I-Clade-3_X;Dino-Group-I-Clade-3_X_sp_;
Otu01615	0.000205461	2.45455	AY664943_1_1753_U	Eukaryota;Alveolata;Dinoflagellata;Dinophyceae;Dinophyceae_X;Dinophyceae_XX;Dinophyceae_XXX;Dinophyceae_XXX_sp_;
Otu01431	0.000205461	2.45455	AM503930_1_1801_U	Eukaryota;Alveolata;Dinoflagellata;Dinophyceae;Gymnodiniales;Gymnodiniaceae;Gyrodinium;Gyrodinium_dominans;
Otu01979	0.000205461	2.45455	DQ388461_1_1689_U	Eukaryota;Alveolata;Dinoflagellata;Noctilucophyceae;Noctilucales;Noctilucaceae;Noctiluca;Noctiluca_scintillans;
Otu02371	0.000205461	2.45455	EU446389_1_1555_U	Eukaryota;Alveolata;Dinoflagellata;Syndiniales;Dino-Group-II;Dino-Group-II-Clade-4;Dino-Group-II-Clade-4_X;Dino-Group-II-Clade-4_X_sp_;
Otu01882	0.000205461	2.45455	AB246746_1_1727_U	Eukaryota;Stramenopiles;Ochrophyta;Bacillariophyta;Bacillariophyta_X;Polar-centric-Mediophyceae;Chaetoceros;Chaetoceros_sp_P__quinquecorne_endosymbiont;
Otu02296	0.000639212	2.45	KJ609050_1_1739_U	Eukaryota;Alveolata;Ciliophora;Spirotrichea;Strombidiida;Strombidiidae_B;Strombidium_B;Strombidium_tropicum;
Otu01482	0.000296777	2.44928	AY664955_1_1752_U	Eukaryota;Alveolata;Dinoflagellata;Dinophyceae;Dinophyceae_X;Dinophyceae_XX;Dinophyceae_XXX;Dinophyceae_XXX_sp_;
Otu02242	0.000981647	2.44901	KJ763824_1_1799_U	Eukaryota;Alveolata;Dinoflagellata;Dinophyceae;Dinophyceae_X;Dinophyceae_XX;Dinophyceae_XXX;Dinophyceae_XXX_sp_;
Otu02628	0.00155237	2.43882	AY664994_1_1756_U	Eukaryota;Alveolata;Dinoflagellata;Dinophyceae;Dinophyceae_X;Dinophyceae_XX;Dinophyceae_XXX;Dinophyceae_XXX_sp_;
Otu01500	0.00431468	2.43813	AF133909_1_1715_U	Eukaryota;Alveolata;Perkinsea;Perkinsida;Perkinsida_X;Parvilucifera-group;Parvilucifera;Parvilucifera_infectans;
Otu01554	0.000525067	2.43779	KC488422_1_1683_U	Eukaryota;Alveolata;Ciliophora;Spirotrichea;Strombidiida;Strombidiidae_H;Strombidiidae_H_X;Strombidiidae_H_X_sp_;
Otu00917	0.00335586	2.43646	EF526902_1_1343_U	Eukaryota;Alveolata;Dinoflagellata;Dinophyceae;Gymnodiniales;Warnowiaceae;Proterythropsis;Proterythropsis_sp_;
Otu01151	0.0014154	2.43599	HQ393985_1_819_U	Eukaryota;Alveolata;Dinoflagellata;Dinophyceae;Dinophyceae_X;Dinophyceae_XX;Dinophyceae_XXX;Dinophyceae_XXX_sp_;
Otu02652	0.00278514	2.41467	AF243501_1_1796_U	Eukaryota;Stramenopiles;Opalozoa;Bicoecea;Pseudodendromonadales;Pseudodendromonadales_X;Adriamonas;Adriamonas_peritocrescens;
Otu02165	0.0029906	2.4133	AB622292_1_1639_U	Eukaryota;Alveolata;Ciliophora;Spirotrichea;Choreotrichida;Strobilidiidae_D;Rimostrombidium_D;Rimostrombidium_D_sp_;
Otu01478	0.000935989	2.41176	JX188330_1_1758_U	Eukaryota;Alveolata;Dinoflagellata;Syndiniales;Dino-Group-II;Dino-Group-II-Clade-16;Dino-Group-II-Clade-16_X;Dino-Group-II-Clade-16_X_sp_;
Otu02332	0.00132408	2.39943	JF727585_1_751_U	Eukaryota;Alveolata;Ciliophora;Phyllopharyngea;Cyrtophoria_1;PHYLL_4;PHYLL_4_X;PHYLL_4_X_sp_;
Otu26696	0.00022829	2.38095	KJ763176_1_1783_U	Eukaryota;Alveolata;Dinoflagellata;Syndiniales;Dino-Group-I;Dino-Group-I-Clade-4;Dino-Group-I-Clade-4_X;Dino-Group-I-Clade-4_X_sp_;
Otu01891	0.00022829	2.38095	KJ760538_1_1800_U	Eukaryota;Alveolata;Dinoflagellata;Syndiniales;Dino-Group-II;Dino-Group-II-Clade-12;Dino-Group-II-Clade-12_X;Dino-Group-II-Clade-12_X_sp_;
Otu01654	0.00022829	2.38095	MG972282_1_1712_U	Eukaryota;Stramenopiles;Ochrophyta;Bacillariophyta;Bacillariophyta_X;Polar-centric-Mediophyceae;Chaetoceros;Chaetoceros_lauderi;
Otu01816	0.00116428	2.37969	KF129751_1_1759_U	Eukaryota;Alveolata;Dinoflagellata;Syndiniales;Dino-Group-I;Dino-Group-I-Clade-5;Dino-Group-I-Clade-5_X;Dino-Group-I-Clade-5_X_sp_;
Otu01942	0.000821844	2.37363	HM236335_1_1755_U	Eukaryota;Alveolata;Ciliophora;Oligohymenophorea;Scuticociliatia_1;Philasterida;Porpostoma;Porpostoma_notata;
Otu36607	0.000753357	2.37255	KJ763481_1_1796_U	Eukaryota;Alveolata;Dinoflagellata;Syndiniales;Dino-Group-II;Dino-Group-II-Clade-1;Dino-Group-II-Clade-1_X;Dino-Group-II-Clade-1_X_sp_;
Otu26174	0.000502238	2.37255	HQ394045_1_822_U	Eukaryota;Alveolata;Ciliophora;Spirotrichea;Strombidiida;Strombidiidae_K;Strombidiidae_K_X;Strombidiidae_K_X_sp_;
Otu02720	0.000342435	2.36842	KC488403_1_1691_U	Eukaryota;Alveolata;Dinoflagellata;Dinophyceae;Prorocentrales;Prorocentraceae;Prorocentrum;Prorocentrum_sp_;
Otu03281	0.000479409	2.35829	AB158654_1_1733_U	Eukaryota;Opisthokonta;Fungi;Ascomycota;Saccharomycotina;Saccharomycetales;Candida;Candida_khmerensis;
Otu01159	0.000410922	2.34783	KJ759463_1_1789_U	Eukaryota;Opisthokonta;Choanoflagellida;Choanoflagellatea;Acanthoecida;Stephanoecidae_Group_H;Stephanoecidae_Group_H_X;Stephanoecidae_Group_H_X_sp_;
Otu01018	0.107273	2.34145	EU780628_1_1652_U	Eukaryota;Alveolata;Dinoflagellata;Dinophyceae;Dinophyceae_X;Dinophyceae_XX;Dinophyceae_XXX;Dinophyceae_XXX_sp_;
Otu02536	0.000159803	2.33333	JQ993418_1_1574_U	Eukaryota;Alveolata;Apicomplexa;Coccidiomorphea;Piroplasmorida;Babesiidae;Babesia1;Babesia1_sp_;
Otu01380	0.000159803	2.33333	KJ361986_1_1669_U	Eukaryota;Alveolata;Dinoflagellata;Dinophyceae;Gonyaulacales;Goniodomataceae;Alexandrium;Alexandrium_ostenfeldii;
Otu02560	0.000159803	2.33333	AY032608_1_1766_U	Eukaryota;Opisthokonta;Fungi;Chytridiomycota;Chytridiomycotina;Chytridiomycetes;Chytridium;Chytridium_polysiphoniae;
Otu06261	0.000159803	2.33333	KF129770_1_1756_U	Eukaryota;Stramenopiles;Sagenista;MAST-7;MAST-7D;MAST-7D_X;MAST-7D_XX;MAST-7D_XX_sp_;
Otu01647	0.000159803	2.33333	AF530537_1_1704_U	Eukaryota;Alveolata;Dinoflagellata;Syndiniales;Dino-Group-I;Dino-Group-I-Clade-1;Dino-Group-I-Clade-1_X;Dino-Group-I-Clade-1_X_sp_;
Otu01886	0.000159803	2.33333	JX188312_1_1754_U	Eukaryota;Alveolata;Dinoflagellata;Syndiniales;Dino-Group-II;Dino-Group-II-Clade-1;Dino-Group-II-Clade-1_X;Dino-Group-II-Clade-1_X_sp_;
Otu00760	0.000159803	2.33333	JQ226358_1_1612_U	Eukaryota;Alveolata;Dinoflagellata;Syndiniales;Dino-Group-II;Dino-Group-II-Clade-10-and-11;Dino-Group-II-Clade-10-and-11_X;Dino-Group-II-Clade-10-and-11_X_sp_;
Otu02016	0.000159803	2.33333	AB191433_1_1700_U	Eukaryota;Opisthokonta;Mesomycetozoa;Ichthyosporea;Ichthyosphonida;Pseudoperkinsidae;Pseudoperkinsidae_X;Pseudoperkinsidae_X_sp_;
Otu01158	0.00068487	2.33161	KF129839_1_1764_U	Eukaryota;Stramenopiles;Opalozoa;MAST-12;MAST-12D;MAST-12D_X;MAST-12D_XX;MAST-12D_XX_sp_;
Otu00355	0.027897	2.32989	KC583005_1_1808_U	Eukaryota;Stramenopiles;Opalozoa;MAST-12;MAST-12A;MAST-12A_X;MAST-12A_XX;MAST-12A_XX_sp_;
Otu02703	0.000570725	2.32342	KJ760135_1_1795_U	Eukaryota;Alveolata;Dinoflagellata;Syndiniales;Dino-Group-I;Dino-Group-I-Clade-5;Dino-Group-I-Clade-5_X;Dino-Group-I-Clade-5_X_sp_;
Otu11921	0.00116428	2.32025	KJ762472_1_1797_U	Eukaryota;Alveolata;Dinoflagellata;Syndiniales;Dino-Group-II;Dino-Group-II-Clade-22;Dino-Group-II-Clade-22_X;Dino-Group-II-Clade-22_X_sp_;
Otu02131	0.000707699	2.31566	EU545711_1_984_U	Eukaryota;Alveolata;Dinoflagellata;Dinophyceae;Dinophyceae_X;Dinophyceae_XX;Dinophyceae_XXX;Dinophyceae_XXX_sp_;
Otu01497	0.000296777	2.31507	KC488396_1_1663_U	Eukaryota;Alveolata;Ciliophora;Spirotrichea;Strombidiida;Strombidiidae_L;Strombidiidae_L_X;Strombidiidae_L_X_sp_;
Otu02437	0.000205461	2.31429	FJ537637_1_808_U	Eukaryota;Hacrobia;Haptophyta;Prymnesiophyceae;Prymnesiales;Chrysochromulinaceae;Chrysochromulina;Chrysochromulina_sp_;
Otu01576	0.00105013	2.29004	KC582957_1_1757_U	Eukaryota;Alveolata;Ciliophora;Spirotrichea;Choreotrichida;Strobilidiidae_I;Strobilidiidae_I_X;Strobilidiidae_I_X_sp_;
Otu02335	0.000182632	2.28571	AB505462_1_1663_U	Eukaryota;Alveolata;Ciliophora;Oligohymenophorea;Scuticociliatia_1;Philasterida;Philasterida_X;Philasterida_X_sp_;
Otu01174	0.00146106	2.28571	EU333058_1_800_U	Eukaryota;Alveolata;Dinoflagellata;Syndiniales;Dino-Group-II;Dino-Group-II-Clade-5;Dino-Group-II-Clade-5_X;Dino-Group-II-Clade-5_X_sp_;
Otu22493	0.000182632	2.28571	KJ759486_1_1802_U	Eukaryota;Alveolata;Dinoflagellata;Dinophyceae;Dinophyceae_X;Dinophyceae_XX;Dinophyceae_XXX;Dinophyceae_XXX_sp_;
Otu37907	0.000182632	2.28571	EF432540_1_1702_U	Eukaryota;Opisthokonta;Choanoflagellida;Choanoflagellatea;Acanthoecida;Stephanoecidae_Group_E;Stephanoecidae_Group_E_X;Stephanoecidae_Group_E_X_sp_;
Otu02746	0.000479409	2.28497	LC272997_1_1803_U	Eukaryota;Alveolata;Dinoflagellata;Dinophyceae;Suessiales;Suessiales_X;Dactylodinium;Dactylodinium_pterobelotum;
Otu28316	0.000502238	2.28302	JF727585_1_751_U	Eukaryota;Alveolata;Ciliophora;Phyllopharyngea;Cyrtophoria_1;PHYLL_4;PHYLL_4_X;PHYLL_4_X_sp_;
Otu04341	0.000319606	2.27907	AY443024_1_1740_U	Eukaryota;Alveolata;Dinoflagellata;Dinophyceae;Gonyaulacales;Pyrophacaceae;Pyrophacus;Pyrophacus_steinii;
Otu01990	0.000114145	2.27273	KU525751_1_1646_U	Eukaryota;Alveolata;Ciliophora;Spirotrichea;Strombidiida;Strombidiidae_N;Strombidium_N;Strombidium_cf_parastylifer;
Otu23930	0.000114145	2.27273	AB695539_1_1755_U	Eukaryota;Alveolata;Dinoflagellata;Dinophyceae;Dinophyceae_X;Dinophyceae_XX;Dinophyceae_XXX;Dinophyceae_XXX_sp_;
Otu02533	0.000114145	2.27273	EU143406_1_896_U	Eukaryota;Archaeplastida;Chlorophyta;Mamiellophyceae;Dolichomastigales;Dolichomastigaceae;Dolichomastigaceae-A;Dolichomastigaceae-A_sp_;
Otu02417	0.000342435	2.27273	KJ925263_1_1690_U	Eukaryota;Alveolata;Dinoflagellata;Syndiniales;Dino-Group-II;Dino-Group-II-Clade-10-and-11;Dino-Group-II-Clade-10-and-11_X;Dino-Group-II-Clade-10-and-11_X_sp_;
Otu01750	0.00022829	2.27273	KC814811_1_1731_U	Eukaryota;Stramenopiles;Ochrophyta;Bacillariophyta;Bacillariophyta_X;Radial-centric-basal-Coscinodiscophyceae;Leptocylindrus;Leptocylindrus_convexus;
Otu32307	0.000114145	2.27273	EU793274_1_1572_U	Eukaryota;Alveolata;Dinoflagellata;Syndiniales;Dino-Group-II;Dino-Group-II-Clade-1;Dino-Group-II-Clade-1_X;Dino-Group-II-Clade-1_X_sp_;
Otu02506	0.000114145	2.27273	KC488509_1_1708_U	Eukaryota;Alveolata;Dinoflagellata;Syndiniales;Dino-Group-II;Dino-Group-II-Clade-12;Dino-Group-II-Clade-12_X;Dino-Group-II-Clade-12_X_sp_;
Otu01229	0.000114145	2.27273	KJ758732_1_1796_U	Eukaryota;Alveolata;Dinoflagellata;Syndiniales;Dino-Group-II;Dino-Group-II-Clade-3;Dino-Group-II-Clade-3_X;Dino-Group-II-Clade-3_X_sp_;
Otu02325	0.000114145	2.27273	JF730871_1_1697_U	Eukaryota;Alveolata;Dinoflagellata;Syndiniales;Dino-Group-II;Dino-Group-II-Clade-3;Dino-Group-II-Clade-3_X;Dino-Group-II-Clade-3_X_sp_;
Otu02711	0.000114145	2.27273	HQ394014_1_865_U	Eukaryota;Hacrobia;Picozoa;Picozoa_X;Picozoa_XX;Picozoa_XXX;Picozoa_XXXX;Picozoa_XXXX_sp_;
Otu09224	0.000114145	2.27273	AF109323_1_1786_U	Eukaryota;Stramenopiles;Ochrophyta;Chrysophyceae;Chrysophyceae_X;Chrysophyceae_Clade-F;Paraphysomonas;Paraphysomonas_imperforata;
Otu01735	0.000570725	2.25632	FN690467_1_805_U	Eukaryota;Opisthokonta;Mesomycetozoa;Ichthyosporea;Ichthyosphonida;Abeoformidae_Group_MAIP_1;Abeoformidae_Group_MAIP_1_X;Abeoformidae_Group_MAIP_1_X_sp_;
Otu02579	0.000296777	2.25333	AY664921_1_1754_U	Eukaryota;Alveolata;Dinoflagellata;Dinophyceae;Prorocentrales;Prorocentraceae;Prorocentrum;Prorocentrum_sp_;
Otu01996	0.000388093	2.24031	FJ870070_1_1726_U	Eukaryota;Alveolata;Ciliophora;Phyllopharyngea;Cyrtophoria_1;Pithitidae;Pithites;Pithites_vorax;
Otu01050	0.000388093	2.24031	EF527109_1_1755_U	Eukaryota;Alveolata;Dinoflagellata;Dinophyceae;Gonyaulacales;Ceratiaceae;Ceratium;Ceratium_sp_;
Otu02514	0.00885765	2.23611	EF172811_1_1603_U	Eukaryota;Alveolata;Dinoflagellata;Dinophyceae;Dinophyceae_X;Dinophyceae_XX;Dinophyceae_XXX;Dinophyceae_XXX_sp_;
Otu12908	0.000319606	2.22727	KJ763359_1_1795_U	Eukaryota;Alveolata;Dinoflagellata;Dinophyceae;Dinophyceae_X;Dinophyceae_XX;Dinophyceae_XXX;Dinophyceae_XXX_sp_;
Otu01494	0.00534199	2.22008	AY651072_1_1697_U	Eukaryota;Stramenopiles;Ochrophyta;Chrysophyceae;Chrysophyceae_X;Chrysophyceae_Clade-C;Poteriospumella;Poteriospumella_lacustris;
Otu02176	0.000821844	2.21918	FJ870070_1_1726_U	Eukaryota;Alveolata;Ciliophora;Phyllopharyngea;Cyrtophoria_1;Pithitidae;Pithites;Pithites_vorax;
Otu40855	0.00678021	2.21147	KJ758598_1_1785_U	Eukaryota;Alveolata;Dinoflagellata;Syndiniales;Dino-Group-I;Dino-Group-I-Clade-8;Dino-Group-I-Clade-8_X;Dino-Group-I-Clade-8_X_sp_;
Otu01739	0.00105013	2.20877	FN598266_1_1052_U	Eukaryota;Alveolata;Ciliophora;Phyllopharyngea;Cyrtophoria_1;PHYLL_4;PHYLL_4_X;PHYLL_4_X_sp_;
Otu02352	0.00392659	2.19923	AY919777_1_1720_U	Eukaryota;Stramenopiles;Ochrophyta;Chrysophyceae;Chrysophyceae_X;Chrysophyceae_Clade-C;Chrysophyceae_Clade-C_X;Chrysophyceae_Clade-C_X_sp_;
Otu01232	0.000593554	2.19481	DQ514858_1_1719_U	Eukaryota;Stramenopiles;Ochrophyta;Bacillariophyta;Bacillariophyta_X;Polar-centric-Mediophyceae;Cyclotella;Cyclotella_atomus;
Otu01782	0.00520501	2.1888	U37406_1_1796_U	Eukaryota;Alveolata;Dinoflagellata;Dinophyceae;Suessiales;Suessiaceae;Pelagodinium;Pelagodinium_beii;
Otu00637	0.00869785	2.18356	DQ186536_1_1746_U	Eukaryota;Alveolata;Dinoflagellata;Syndiniales;Dino-Group-I;Dino-Group-I-Clade-3;Dino-Group-I-Clade-3_X;Dino-Group-I-Clade-3_X_sp_;
Otu01390	0.00568442	2.18198	KJ763567_1_1799_U	Eukaryota;Alveolata;Dinoflagellata;Syndiniales;Dino-Group-II;Dino-Group-II-Clade-10-and-11;Dino-Group-II-Clade-10-and-11_X;Dino-Group-II-Clade-10-and-11_X_sp_;
Otu02071	0.000273948	2.18182	KJ757787_1_1799_U	Eukaryota;Alveolata;Dinoflagellata;Dinophyceae;Dinophyceae_X;Dinophyceae_XX;Dinophyceae_XXX;Dinophyceae_XXX_sp_;
Otu02606	0.000273948	2.18182	DQ186532_1_1758_U	Eukaryota;Alveolata;Dinoflagellata;Syndiniales;Dino-Group-II;Dino-Group-II-Clade-12;Dino-Group-II-Clade-12_X;Dino-Group-II-Clade-12_X_sp_;
Otu01153	0.0252945	2.17737	EU371357_1_1738_U	Eukaryota;Alveolata;Ciliophora;Spirotrichea;Strombidiida;Strombidiidae_R;Strombidiidae_R_X;Strombidiidae_R_X_sp_;
Otu02472	0.0146106	2.17632	JQ226417_1_1605_U	Eukaryota;Alveolata;Dinoflagellata;Syndiniales;Dino-Group-II;Dino-Group-II_X;Dino-Group-II_XX;Dino-Group-II_XX_sp_;
Otu01613	0.00045658	2.17391	JF730792_1_1690_U	Eukaryota;Opisthokonta;Fungi;Chytridiomycota;Chytridiomycotina;Chytridiomycotina_X;Chytridiomycotina_XX;Chytridiomycotina_XX_sp_;
Otu02001	0.00022829	2.17391	AY665096_1_1737_U	Eukaryota;Opisthokonta;Choanoflagellida;Choanoflagellatea;Acanthoecida;Stephanoecidae_Group_D;Stephanoecidae_Group_D_X;Stephanoecidae_Group_D_X_sp_;
Otu02787	0.000479409	2.17241	HQ912408_1_1629_U	Eukaryota;Stramenopiles;Ochrophyta;Bacillariophyta;Bacillariophyta_X;Raphid-pennate;Epithemia;Epithemia_argus;
Otu01288	0.000410922	2.16	KJ763567_1_1799_U	Eukaryota;Alveolata;Dinoflagellata;Syndiniales;Dino-Group-II;Dino-Group-II-Clade-10-and-11;Dino-Group-II-Clade-10-and-11_X;Dino-Group-II-Clade-10-and-11_X_sp_;
Otu01564	0.00118711	2.15974	AB534335_1_1626_U	Eukaryota;Rhizaria;Cercozoa;Filosa-Sarcomonadea;Glissomonadida;Sandonidae;Sandonidae_X;Sandonidae_X_sp_;
Otu01770	0.000433751	2.13609	AB178865_1_1782_U	Eukaryota;Stramenopiles;Pseudofungi;Oomycota;Oomycota_X;Haliphthorales;Haliphthoros;Haliphthoros_sp_;
Otu33433	0.000182632	2.13333	GQ499192_1_1014_U	Eukaryota;Stramenopiles;Sagenista;Labyrinthulomycetes;Labyrinthulida;Labyrinthulaceae;Labyrinthula;Labyrinthula_sp_;
Otu01422	0.000365264	2.13333	KJ762277_1_1800_U	Eukaryota;Alveolata;Dinoflagellata;Dinophyceae;Dinophyceae_X;Dinophyceae_XX;Dinophyceae_XXX;Dinophyceae_XXX_sp_;
Otu02781	0.000182632	2.13333	AF022198_1_1801_U	Eukaryota;Alveolata;Dinoflagellata;Dinophyceae;Peridiniales;Heterocapsaceae;Heterocapsa;Heterocapsa_triquetra;
Otu02308	0.000182632	2.13333	DQ103798_1_1634_U	Eukaryota;Alveolata;Dinoflagellata;Syndiniales;Dino-Group-I;Dino-Group-I-Clade-4;Dino-Group-I-Clade-4_X;Dino-Group-I-Clade-4_X_sp_;
Otu01700	0.000182632	2.13333	EU446389_1_1555_U	Eukaryota;Alveolata;Dinoflagellata;Syndiniales;Dino-Group-II;Dino-Group-II-Clade-4;Dino-Group-II-Clade-4_X;Dino-Group-II-Clade-4_X_sp_;
Otu01033	0.00397225	2.12702	AY665047_1_1737_U	Eukaryota;Alveolata;Ciliophora;Spirotrichea;Strombidiida;Strombidiidae_G;Strombidiidae_G_X;Strombidiidae_G_X_sp_;
Otu01649	0.000251119	2.12281	GQ483674_1_817_U	Eukaryota;Alveolata;Dinoflagellata;Dinophyceae;Suessiales;Suessiaceae;Suessiaceae_X;Suessiaceae_X_sp_;
Otu02512	0.000251119	2.12281	EF060620_1_882_U	Eukaryota;Opisthokonta;Fungi;Ascomycota;Pezizomycotina;Eurotiomycetes;Eurotiomycetes_X;Eurotiomycetes_X_sp_;
Otu01946	0.000251119	2.12281	FN690467_1_805_U	Eukaryota;Opisthokonta;Mesomycetozoa;Ichthyosporea;Ichthyosphonida;Abeoformidae_Group_MAIP_1;Abeoformidae_Group_MAIP_1_X;Abeoformidae_Group_MAIP_1_X_sp_;
Otu00875	0.00143823	2.10781	KF130101_1_1754_U	Eukaryota;Alveolata;Dinoflagellata;Syndiniales;Dino-Group-II;Dino-Group-II-Clade-10-and-11;Dino-Group-II-Clade-10-and-11_X;Dino-Group-II-Clade-10-and-11_X_sp_;
Otu02184	0.000342435	2.1028	KJ761122_1_1799_U	Eukaryota;Alveolata;Dinoflagellata;Dinophyceae;Dinophyceae_X;Dinophyceae_XX;Dinophyceae_XXX;Dinophyceae_XXX_sp_;
Otu02027	0.000342435	2.1028	KJ758731_1_1801_U	Eukaryota;Alveolata;Dinoflagellata;Syndiniales;Dino-Group-II;Dino-Group-II-Clade-10-and-11;Dino-Group-II-Clade-10-and-11_X;Dino-Group-II-Clade-10-and-11_X_sp_;
Otu00579	0.00166652	2.09886	KJ760600_1_1800_U	Eukaryota;Alveolata;Dinoflagellata;Dinophyceae;Gymnodiniales;Gymnodiniaceae;Gyrodinium;Gyrodinium_sp_;
Otu01901	0.000707699	2.09368	KJ762878_1_1787_U	Eukaryota;Alveolata;Dinoflagellata;Syndiniales;Dino-Group-I;Dino-Group-I-Clade-3;Dino-Group-I-Clade-3_X;Dino-Group-I-Clade-3_X_sp_;
Otu01162	0.0603142	2.09145	KJ925446_1_1502_U	Eukaryota;Alveolata;Dinoflagellata;Dinophyceae;Dinophyceae_X;Dinophyceae_XX;Dinophyceae_XXX;Dinophyceae_XXX_sp_;
Otu02769	0.000319606	2.08511	KJ925383_1_1505_U	Eukaryota;Alveolata;Dinoflagellata;Dinophyceae;Peridiniales;Thoracosphaeraceae;Thoracosphaeraceae_X;Thoracosphaeraceae_X_sp_;
Otu01184	0.000707699	2.0846	KF129839_1_1764_U	Eukaryota;Stramenopiles;Opalozoa;MAST-12;MAST-12D;MAST-12D_X;MAST-12D_XX;MAST-12D_XX_sp_;
Otu02509	0.000388093	2.07914	MG972279_1_1711_U	Eukaryota;Stramenopiles;Ochrophyta;Bacillariophyta;Bacillariophyta_X;Polar-centric-Mediophyceae;Chaetoceros;Chaetoceros_eibenii;
Otu37657	0.000205461	2.07692	AF509625_1_1681_U	Eukaryota;Archaeplastida;Chlorophyta;Mamiellophyceae;Dolichomastigales;Dolichomastigaceae;Dolichomastix;Dolichomastix_tenuilepis;
Otu40835	0.000205461	2.07692	AB430599_1_1749_U	Eukaryota;Stramenopiles;Ochrophyta;Bacillariophyta;Bacillariophyta_X;Araphid-pennate;Fragilaria;Fragilaria_bidens;
Otu01846	0.000958818	2.07529	KF301567_1_1662_U	Eukaryota;Alveolata;Ciliophora;Oligohymenophorea;Oligohymenophorea_X;Oligohymenophorea_XX;Platynematum;Platynematum_salinarum;
Otu01835	0.000547896	2.07194	AB451532_1_1737_U	Eukaryota;Opisthokonta;Fungi;Basidiomycota;Agaricomycotina;Agaricomycetes;Agaricomycetes_X;Agaricomycetes_X_sp_;
Otu02329	0.00105013	2.06238	AF164123_1_1771_U	Eukaryota;Alveolata;Ciliophora;Spirotrichea;Hypotrichia;Oxytrichidae;Stylonychia;Stylonychia_mytilus;
Otu01706	0.00607251	2.05794	AY143565_1_1683_U	Eukaryota;Alveolata;Ciliophora;Spirotrichea;Strombidiida;Strombidiidae_K;Strombidium_K;Strombidium_K_sp_;
Otu01078	0.00162086	2.05503	AY664893_1_1754_U	Eukaryota;Alveolata;Dinoflagellata;Dinophyceae;Gymnodiniales;Gymnodiniaceae;Gymnodinium;Gymnodinium_dorsalisulcum;
Otu02057	0.00143823	2.05116	KJ759528_1_1804_U	Eukaryota;Alveolata;Dinoflagellata;Syndiniales;Dino-Group-III;Dino-Group-III_X;Dino-Group-III_XX;Dino-Group-III_XX_sp_;
Otu01126	0.000251119	2.05085	FN598235_1_1139_U	Eukaryota;Alveolata;Dinoflagellata;Dinophyceae;Dinophyceae_X;Dinophyceae_XX;Dinophyceae_XXX;Dinophyceae_XXX_sp_;
Otu39742	0.000251119	2.05085	FJ217814_1_1521_U	Eukaryota;Alveolata;Dinoflagellata;Dinophyceae;Peridiniales;Amphidomataceae;Azadinium;Azadinium_spinosum;
Otu01419	0.000251119	2.05085	KF130233_1_1761_U	Eukaryota;Alveolata;Dinoflagellata;Syndiniales;Dino-Group-II;Dino-Group-II-Clade-4;Dino-Group-II-Clade-4_X;Dino-Group-II-Clade-4_X_sp_;
Otu01332	0.000388093	2.04965	KJ763639_1_1798_U	Eukaryota;Alveolata;Dinoflagellata;Dinophyceae;Dinophyceae_X;Dinophyceae_XX;Dinophyceae_XXX;Dinophyceae_XXX_sp_;
Otu02555	0.000388093	2.04965	AY664925_1_1753_U	Eukaryota;Alveolata;Dinoflagellata;Dinophyceae;Dinophyceae_X;Dinophyceae_XX;Dinophyceae_XXX;Dinophyceae_XXX_sp_;
Otu01101	0.0406356	2.04743	DQ103863_1_1790_U	Eukaryota;Alveolata;Dinoflagellata;Dinophyceae;Dinophyceae_X;Dinophyceae_XX;Dinophyceae_XXX;Dinophyceae_XXX_sp_;
Otu37840	0.000890331	2.04711	KJ760891_1_1801_U	Eukaryota;Alveolata;Dinoflagellata;Syndiniales;Dino-Group-II;Dino-Group-II_X;Dino-Group-II_XX;Dino-Group-II_XX_sp_;
Otu02469	0.00239704	2.04432	AF022201_1_1803_U	Eukaryota;Alveolata;Dinoflagellata;Dinophyceae;Peridiniales;Thoracosphaeraceae;Pentapharsodinium;Pentapharsodinium_tyrrhenicum;
Otu01978	0.000547896	2.04255	JQ956270_1_1617_U	Eukaryota;Alveolata;Ciliophora;Phyllopharyngea;Cyrtophoria_1;PHYLL_4;PHYLL_4_X;PHYLL_4_X_sp_;
Otu38740	0.000821844	2.03135	FJ876959_1_1683_U	Eukaryota;Alveolata;Ciliophora;Spirotrichea;Choreotrichida;Strobilidiidae_I;Pelagostrobilidium;Pelagostrobilidium_minutum;
Otu00819	0.00305909	2.01753	HQ343199_1_993_U	Eukaryota;Stramenopiles;Pseudofungi;Oomycota;Oomycota_X;Peronosporales;Lagenidium;Lagenidium_sp_;
Otu00865	0.00276231	2.00315	EF527082_1_1314_U	Eukaryota;Alveolata;Ciliophora;CONThreeP;CONThreeP_X;CONThreeP_XX;Askenasia;Askenasia_sp_;
Otu00707	0.0104785	2.00223	HQ438142_1_1613_U	Eukaryota;Alveolata;Dinoflagellata;Dinophyceae;Dinophyceae_X;Dinophyceae_XX;Dinophyceae_XXX;Dinophyceae_XXX_sp_;
Otu02163	0.000136974	2	FJ870070_1_1726_U	Eukaryota;Alveolata;Ciliophora;Phyllopharyngea;Cyrtophoria_1;Pithitidae;Pithites;Pithites_vorax;
Otu02330	0.000136974	2	JF791093_1_1777_U	Eukaryota;Alveolata;Dinoflagellata;Dinophyceae;Dinophyceae_X;Dinophyceae_XX;Dinophyceae_XXX;Dinophyceae_XXX_sp_;
Otu02559	0.000136974	2	KJ758222_1_1798_U	Eukaryota;Alveolata;Dinoflagellata;Dinophyceae;Dinophyceae_X;Dinophyceae_XX;Dinophyceae_XXX;Dinophyceae_XXX_sp_;
Otu02624	0.000136974	2	KJ757764_1_1800_U	Eukaryota;Alveolata;Dinoflagellata;Dinophyceae;Dinophyceae_X;Dinophyceae_XX;Dinophyceae_XXX;Dinophyceae_XXX_sp_;
Otu13941	0.000136974	2	AB695506_1_1753_U	Eukaryota;Alveolata;Dinoflagellata;Dinophyceae;Suessiales;Suessiaceae;Suessiaceae_X;Suessiaceae_X_sp_;
Otu24612	0.000136974	2	KF130002_1_1751_U	Eukaryota;Alveolata;Dinoflagellata;Syndiniales;Dino-Group-II;Dino-Group-II-Clade-14;Dino-Group-II-Clade-14_X;Dino-Group-II-Clade-14_X_sp_;
Otu40741	0.000136974	2	KJ759645_1_1798_U	Eukaryota;Alveolata;Dinoflagellata;Syndiniales;Dino-Group-II;Dino-Group-II-Clade-4;Dino-Group-II-Clade-4_X;Dino-Group-II-Clade-4_X_sp_;
Otu14447	0.000136974	2	AB191433_1_1700_U	Eukaryota;Opisthokonta;Mesomycetozoa;Ichthyosporea;Ichthyosphonida;Pseudoperkinsidae;Pseudoperkinsidae_X;Pseudoperkinsidae_X_sp_;
Otu02639	9.1316e-05	2	KC911786_1_817_U	Eukaryota;Alveolata;Ciliophora;Spirotrichea;Choreotrichida;Strobilidiidae_G;Strobilidiidae_G_X;Strobilidiidae_G_X_sp_;
Otu02008	9.1316e-05	2	JN832761_1_965_U	Eukaryota;Alveolata;Dinoflagellata;Dinophyceae;Dinophyceae_X;Dinophyceae_XX;Dinophyceae_XXX;Dinophyceae_XXX_sp_;
[truncated: 3,012 more rows]

## Sheet: Table S6
Table S6. OTUs identified as differentially abundant between gulfs. Differential abundance detection depth (S: surface, S: Secchi depth, 2XS: 2xSecchi depth), niche breadth (tg: top generalist, g: generalist, s: specialist).
OTU	Sur	S	2XS	Abundance	Levin	Closest relative[GenbankID](% identity)	Taxonomic affiliation	Trophic group
Otu02462			X	rare	es	Chlamydomonas parkeae[AB058373](99.58)	Cholorophyta	autotroph
Otu00102	X		X	common	tg	Micromonas sp.[AY425318](96.68)	Cholorophyta	autotroph
Otu00064			X	rare	g	Paraphysomonas imperforata[AF109324](100)	Bacillariohyta	autotroph
Otu00022			X	abundant	g	Chrysophyceae Clade-H X sp [KC582999](99.79)	Chyrosophyceae	autotroph
Otu00119			X	common	tg	Leptocylindrus danicus[JX413558]100	Bacillariohyta	autotroph
Otu00113	X			common	g	Tetraselmis sp [AB058392](100)	Cholorophyta	autotroph
Otu00919	X			rare	tg	Nephroselmis pyriformis[AB058391](100)	Cholorophyta	autotroph
Otu01918	X			rare	tg	Nephroselmis viridis[AB214976](99.16)	Cholorophyta	autotroph
Otu00713	X	X		rare	g	Chaetoceros affinis[MG972330](95.84)	Bacillariohyta	autotroph
Otu01228		X		rare	s	Chaetoceros mitra[KX611427](97.04)	Bacillariohyta	autotroph
Otu00037	X			abundant	tg	Chaetoceros sp P quinquecorne endosymbiont[AB246746](100)	Bacillariohyta	autotroph
Otu00031	X			abundant	tg	Leptocylindrus convexus[KC814811](100)	Bacillariohyta	autotroph
Otu00164	X			common	tg	MOCH-5 XXX sp [KC583020](100)	Bacillariohyta	autotroph
Otu40000			X	rare	es	Breviatea sp.[EF100280](98.53)	Amoebozoa	micrograzer
Otu40891			X	rare	s	Flamella arnhemensis[EU186022](100)	Amoebozoa	micrograzer
Otu00159			X	common	s	Dinophyceae sp.[AY664941](100)	Dinophyceae	mixotroph
Otu27986			X	rare	es	Dinophyceae sp.[KJ757764](98.76)	Dinophyceae	mixotroph
Otu00004	X		X	abundant	g	Dinophyceae sp.[KJ758222](94.81)	Dinophyceae	mixotroph
Otu25235			X	rare	es	Dinophyceae sp.[KJ758222](97.1)	Dinophyceae	mixotroph
Otu26806			X	rare	es	Dinophyceae sp.[KJ758222](94.61)	Dinophyceae	mixotroph
Otu30364			X	rare	es	Dinophyceae sp.[KJ758222](93.98)	Dinophyceae	mixotroph
Otu32477			X	rare	es	Dinophyceae sp.[KJ758222](94.61)	Dinophyceae	mixotroph
Otu28619			X	rare	es	Dinophyceae sp.[KJ762796](94.19)	Dinophyceae	mixotroph
Otu00158			X	rare	s	Ceratium sp [EF527109](99.79)	Dinophyceae	mixotroph
Otu02648			X	rare	s	Gyrodinium dominans[AM503930](96.88)	Dinophyceae	mixotroph
Otu00128			X	rare	s	Unruhdinium jiulongensis[KM217384](86.29)	Dinophyceae	mixotroph
Otu28230			X	rare	es	Prorocentrum micans[AJ415519](93.78)	Dinophyceae	mixotroph
Otu00783			X	rare	s	Prorocentrum sp [KF130258](98.53)	Dinophyceae	mixotroph
Otu02416			X	rare	es	Suessiales sp.[FN690270](76.88)	Dinophyceae	mixotroph
Otu02346			X	rare	s	Calcidiscus quadriperforatus[AJ544115](100)	Haptophyta	mixotroph
Otu30037			X	rare	es	Chrysochromulina sp [DQ369019](100)	Haptophyta	mixotroph
Otu00288	X	X	X	rare	g	Braarudosphaeraceae sp.[AB058358](100)	Haptophyta	mixotroph
Otu01101		X		rare	s	Dinophyceae sp.[DQ103863](94.58)	Dinophyceae	mixotroph
Otu01018		X		rare	s	Dinophyceae sp.[EU780628](99.38)	Dinophyceae	mixotroph
Otu01142		X		rare	s	Dinophyceae sp.[FN598264](93.97)	Dinophyceae	mixotroph
Otu01711		X		rare	s	Dinophyceae sp.[JN832757](96.05)	Dinophyceae	mixotroph
Otu00265		X		rare	s	Dinophyceae sp.[JX188282](99.79)	Dinophyceae	mixotroph
Otu00284	X	X		rare	tg	Dinophyceae sp.[KF130231](100)	Dinophyceae	mixotroph
Otu00922	X			rare	g	Dinophyceae sp.[KJ759272](96.06)	Dinophyceae	mixotroph
Otu00556		X		common	s	Dinophyceae sp.[KJ759720](96.27)	Dinophyceae	mixotroph
Otu00786	X			rare	tg	Pentapharsodinium tyrrhenicum[AF022201](96.88)	Dinophyceae	mixotroph
Otu00068	X			common	tg	Suessiales sp.[GQ483674](99.17)	Dinophyceae	mixotroph
Otu00134	X	X		common	s	Yihiella yeosuensis[EF526743](99.15)	Dinophyceae	mixotroph
Otu00304		X		rare	s	Noctiluca scintillans[DQ388461](99.78)	Noctilucophyceae	mixotroph
Otu00604	X		X	rare	s	Colpodea sp[EF023549](97.91)	Ciliophora	nanograzer
Otu02499			X	rare	es	Pseudoplatyophrya nana[AF060452](97.7)	Ciliophora	nanograzer
Otu00257			X	common	s	CONTH 6 sp.[KC851782](99.79)	Ciliophora	nanograzer
Otu36179			X	rare	es	Nassophorea sp.[AY665069](98.96)	Ciliophora	nanograzer
Otu00039		X	X	abundant	s	Zoothamnium pelagicum[DQ868351](100)	Ciliophora	nanograzer
Otu00124	X		X	abundant	s	Pelagostrobilidium minutum[FJ876959](99.37)	Ciliophora	nanograzer
Otu00737	X	X	X	rare	s	Strobilidiidae I sp.[KC488367](98.74)	Ciliophora	nanograzer
Otu00094			X	common	g	Codonellopsis americana[AY143571](100)	Ciliophora	nanograzer
Otu00710			X	rare	s	Rhizodomus tagatzi[JQ392572](100)	Ciliophora	nanograzer
Otu00275	X			rare	s	Askenasia sp.[AY642698](98.94)	Ciliophora	nanograzer
Otu00224	X			rare	tg	Strombidiida sp.[AB275030](98.32)	Ciliophora	nanograzer
Otu00409	X	X		rare	tg	Strombidiidae K sp.[AF372790](98.75)	Ciliophora	nanograzer
Otu00663	X			rare	s	Strombidium K sp.[MF527268](98.95)	Ciliophora	nanograzer
Otu00824	X	X		rare	g	Eutintinnus medius[KT792925](100)	Ciliophora	nanograzer
Otu00233	X			rare	g	Eutintinnus tenuis[JN871721](100)	Ciliophora	nanograzer
Otu01630	X			rare	s	Favella campanula[FJ422984](100)	Ciliophora	nanograzer
Otu01122		X		rare	s	Favella panamensis[AY143572](100)	Ciliophora	nanograzer
Otu01370	X			rare	g	Tintinnopsis major[JN831815](99.57)	Ciliophora	nanograzer
Otu00170	X			common	tg	Tintinnidae sp.[KJ758267](100)	Ciliophora	nanograzer
Otu00472	X		X	rare	s	Acanthoecida sp.[KJ762979](98.29)	Choanoflaggelida	nanohetrotroph
Otu25449			X	rare	es	Stephanoecidae Group D sp.[FN690464](100)	Choanoflaggelida	nanohetrotroph
Otu37907			X	rare	s	Stephanoecidae Group E sp.[EF432540](94.62)	Choanoflaggelida	nanohetrotroph
Otu00386	X		X	rare	s	Choanoflagellida sp.[KJ759457](98.13)	Choanoflaggelida	nanohetrotroph
Otu00179	X			rare	g	Uncultured eukaryote, clone: RM2-SGM49 [AB505557](91.98)	Stramenopiles	nanohetrotroph
Otu00263	X			rare	s	Stephanoecidae Group D sp.[KJ763316](98.11)	Choanoflaggelida	nanohetrotroph
Otu01145		X		rare	g	MAST-12A XX sp [HQ219364](96.26)	MAST	nanohetrotroph
Otu00849			X	rare	s	Apostomatia sp.[EU503535](100)	Ciliophora	parasite
Otu00052		X	X	common	s	Blastodinium navicula[DQ317538](97.08)	Dinophyceae	parasite
Otu00056	X	X	X	abundant	g	Dino-Group-I sp[AB252762](100)	Syndiniales	parasite
Otu32631			X	rare	es	Dino-Group-I sp[AY665054](92.36)	Syndiniales	parasite
Otu02487			X	rare	s	Dino-Group-II sp[KJ759041](95.02)	Syndiniales	parasite
Otu02475			X	rare	s	Dino-Group-II sp[KJ760349](93.36)	Syndiniales	parasite
Otu00084			X	common	g	Dino-Group-II sp[EU333053](99.13)	Syndiniales	parasite
Otu00286			X	rare	s	Dino-Group-II sp[KC582953](96.38)	Syndiniales	parasite
Otu00120	X		X	common	tg	Dino-Group-II sp[KJ760385](95.62)	Syndiniales	parasite
Otu01539			X	rare	s	Dino-Group-III sp[KJ759528](99.79)	Syndiniales	parasite
Otu31678			X	rare	s	Phallus hadriani[AY771601](97.5)	Fungi	parasite
Otu01447			X	rare	s	Chytridiomycetes sp.[DQ244013](100)	Fungi	parasite
Otu00518			X	rare	s	Abeoformidae Group MAIP 2 X sp [JN832892](97.91)	Mesomycetazoa	parasite
Otu00153	X			common	tg	Dino-Group-I sp[KJ762507](100)	Syndiniales	parasite
Otu00177	X			rare	s	Dino-Group-II sp[EU793925](100)	Syndiniales	parasite
Otu00612	X			rare	g	Dino-Group-II sp[KC582890](99.79)	Syndiniales	parasite
Otu01316	X			rare	g	Dino-Group-II sp[KF130611](99.37)	Syndiniales	parasite
Otu00281	X			rare	g	Dino-Group-II sp[KJ762603](96.86)	Syndiniales	parasite
Otu01682		X		rare	s	Dino-Group-II sp[EU446389](98.76)	Syndiniales	parasite
Otu00401	X			rare	s	Dino-Group-II sp[EU446389](96.47)	Syndiniales	parasite
Otu00812	X	X		rare	g	Dino-Group-II sp[EU793924](95.42)	Syndiniales	parasite
Otu00242	X			rare	s	Dothideomycetes sp.[AB534471](100)	Fungi	parasite
Otu00165	X	X		rare	s	Cryptomycotina sp.[AB191431](98.54)	Fungi	parasite
Otu00054	X			common	s	Abeoformidae Group MAIP 1 X sp [FN690467](99.16)	Mesomycetazoa	parasite
Otu00144	X			rare	s	Abeoformidae Group MAIP 1 X sp [FN690467](98.95)	Mesomycetazoa	parasite
Otu00104			X	common	tg	Uncultured syndiniales clone PROSOPE.EM-5m.190[EU793933](98)	Syndiniales	parasite

## Sheet: Table S7
Table S6. Correlation analyses and MIC scores used for the network analysis
Surface																								Secchi															2xSecchi
Network-all						Network eleven species																		Var1	Var2	Mice	troph	troph	troph2	troph2			edges-trophic groups	taxonomy	trophic groups	Levin	abund		Var1	Var2	MICe	troph1	troph1	troph2					edges-trophic groups
Var1	Var2	MICe	troph			Var1	Var2	MICe	troph1	troph1	troph2	troph2		OTU	edges	edges-trophic groups	Taxonomy	trophic-group		Levin	abundance			Otu01228	Otu00713	0.510788	1	algae	1	algae		Otu00713	1/0/2/0	Eukaryota;Stramenopiles;Ochrophyta;Bacillariophyta;Bacillariophyta_X;Polar-centric-Mediophyceae;Chaetoceros;Chaetoceros_affinis;	algae	14.2916	0.0386723		Otu00286	Otu00604	0.525766	4	parasite	3	nanograzers		algae	Otu00022	1/1/0/0
Otu00031	Otu00263	-0.604568	1	algae		Otu00056	Otu00919	0.908967	4	parasites	1	algae		Otu00102	13	3/4/1/5	Eukaryota;Archaeplastida;Chlorophyta;Mamiellophyceae;Mamiellales;Mamiellaceae;Micromonas;Micromonas_clade_B4;	algae	Otu00102	25.5805	0.763995			Otu00824	Otu00713	0.529181	3	nano-grazers	1	algae		Otu01228	1/0/0/0	Eukaryota;Stramenopiles;Ochrophyta;Bacillariophyta;Bacillariophyta_X;Polar-centric-Mediophyceae;Chaetoceros;Chaetoceros_mitra;	algae	1.38964	0.0375309		Otu00472	Otu00386	0.503258	3	nanoheterotrophs	3	nanograzers		algae	Otu00064	1/0/1/2
Otu00031	Otu00068	0.665312	1	algae		Otu00102	Otu00288	0.908178	1	algae	2	mixotrophs		Otu00164	12	4/4/1/3	Eukaryota;Stramenopiles;Ochrophyta;MOCH-5;MOCH-5_X;MOCH-5_XX;MOCH-5_XXX;MOCH-5_XXX_sp_;	algae	Otu00164	15.0136	0.25137			Otu00165	Otu00288	0.586676	4	fungi	2	mixotrophs		Otu00134	0/0/1/2	Eukaryota;Alveolata;Dinoflagellata;Dinophyceae;Suessiales;Suessiaceae;Yihiella;Yihiella_yeosuensis;	mixotrophs	8.55396	0.242033		Otu00052	Otu00286	0.652854	4	parasite	4	parasites		algae	Otu00119	2/0/0/2
Otu00031	Otu00409	-0.551832	1	algae		Otu00068	Otu00281	0.883827	2	mixotrophs	2	mixotrophs		Otu00919	19	5/4/4/6	Eukaryota;Archaeplastida;Chlorophyta;Nephroselmidophyceae;Nephroselmidales;Nephroselmidales_X;Nephroselmis;Nephroselmis_pyriformis;	algae	Otu00919	15.161	0.0464342			Otu00265	Otu00556	0.63213	2	mixotrophs	2	mixotrophs		Otu00265	0/2/0/1	Eukaryota;Alveolata;Dinoflagellata;Dinophyceae;Dinophyceae_X;Dinophyceae_XX;Dinophyceae_XXX;Dinophyceae_XXX_sp_;	mixotrophs	3.77916	0.0169619		Otu00386	Otu00124	0.573498	3	nanoheterotrophs	3	nanograzers		mixotroph	Otu00288	1/0/0/0
Otu00031	Otu00177	0.625074	1	algae		Otu00263	Otu00812	0.878661	3	nanograzers/heterotrophs	4	parasites		Otu00068	13	4/4/2/3	Eukaryota;Alveolata;Dinoflagellata;Dinophyceae;Suessiales;Suessiaceae;Suessiaceae_X;Suessiaceae_X_sp_;	mixotroph	Otu00068	19.9191	0.298033			Otu00265	Otu01101	0.63213	2	mixotrophs	2	mixotrophs		Otu00284	0/0/0/1	Eukaryota;Alveolata;Dinoflagellata;Dinophyceae;Dinophyceae_X;Dinophyceae_XX;Dinophyceae_XXX;Dinophyceae_XXX_sp_;	mixotrophs	26.1545	0.17713		Otu00022	Otu00119	0.558445	1	algae	1	algae		nanoheterotrophs	Otu00386	0/0/2/0
Otu00031	Otu00281	0.63996	1	algae		Otu00177	Otu00281	0.877844	4	parasites	2	mixotrophs		Otu00288	17	5/3/4/5	Eukaryota;Hacrobia;Haptophyta;Prymnesiophyceae;Prymnesiophyceae_X;Braarudosphaeraceae;Braarudosphaeraceae_X;Braarudosphaeraceae_X_sp_;	mixotroph	Otu00288	14.694	0.098256			Otu00556	Otu01101	0.638584	2	mixotrophs	2	mixotrophs		Otu00556	0/2/0/1	Eukaryota;Alveolata;Dinoflagellata;Dinophyceae;Dinophyceae_X;Dinophyceae_XX;Dinophyceae_XXX;Dinophyceae_XXX_sp_;	mixotrophs	4.84311	0.235207		Otu00064	Otu00119	0.585633	1	algae	1	algae		nanoheterotrophs	Otu00472	0/0/1/0
Otu00031	Otu00812	-0.596238	1	algae		Otu00812	Otu00919	0.873981	4	parasites	1	algae		Otu00409	12	5/3/1/3	Eukaryota;Alveolata;Ciliophora;Spirotrichea;Strombidiida;Strombidiidae_K;Strombidiidae_K_X;Strombidiidae_K_X_sp_;	nanograzer	Otu00409	0.111542	21.3631			Otu00737	Otu00288	0.640017	3	nano-grazers	2	mixotrophs		Otu01101	0/2/0/1	Eukaryota;Alveolata;Dinoflagellata;Dinophyceae;Dinophyceae_X;Dinophyceae_XX;Dinophyceae_XXX;Dinophyceae_XXX_sp_;	mixotrophs	2.04743	0.0406356		Otu00104	Otu00119	0.790552	4	parasite	1	algae		nanograzer	Otu00124	1/0/1/0
Otu00031	Otu00124	-0.548191	1	algae		Otu00102	Otu00409	0.850143	1	algae	3	nanograzers/heterotrophs		Otu00263	12	3/3/3/3	Eukaryota;Opisthokonta;Choanoflagellida;Choanoflagellatea;Acanthoecida;Stephanoecidae_Group_D;Stephanoecidae_Group_D_X;Stephanoecidae_Group_D_X_sp_;	nanoheterotrophs	Otu00263	7.74031	0.133527			Otu00052	Otu00265	0.682318	4	parasite	2	mixotrophs		Otu00288	0/0/2/3	Eukaryota;Hacrobia;Haptophyta;Prymnesiophyceae;Prymnesiophyceae_X;Braarudosphaeraceae;Braarudosphaeraceae_X;Braarudosphaeraceae_X_sp_;	mixotrophs	14.694	0.098256		Otu00064	Otu00104	0.454314	1	algae	4	parasites		nanograzer	Otu00737	0/0/0/1
Otu00031	Otu00153	0.753873	1	algae		Otu00056	Otu00288	0.833765	4	parasites	2	mixotrophs		Otu00056	12	5/4/1/2	Eukaryota;Alveolata;Dinoflagellata;Syndiniales;Dino-Group-I;Dino-Group-I-Clade-1;Dino-Group-I-Clade-1_X;Dino-Group-I-Clade-1_X_sp_;	parasites	Otu00056	10.5306	2.19017			Otu00056	Otu00288	-0.628954	4	parasite	2	mixotrophs		Otu00409	0/2/0/2	Eukaryota;Alveolata;Ciliophora;Spirotrichea;Strombidiida;Strombidiidae_K;Strombidiidae_K_X;Strombidiidae_K_X_sp_;	nanograzers	21.3631	0.111542		Otu00084	Otu00104	0.610347	4	parasite	4	parasites		nanograzer	Otu00604	0/0/0/1
Otu00031	Otu00170	0.73832	1	algae		Otu00281	Otu00409	0.831268	2	mixotrophs	3	nanograzers/heterotrophs		Otu00177	12	4/4/2/2/	Eukaryota;Alveolata;Dinoflagellata;Syndiniales;Dino-Group-II;Dino-Group-II-Clade-10-and-11;Dino-Group-II-Clade-10-and-11_X;Dino-Group-II-Clade-10-and-11_X_sp_;	parasites	Otu00177	7.84913	0.19964			Otu00052	Otu00556	0.648005	4	parasite	2	mixotrophs		Otu00737	1/1/0/0	Eukaryota;Alveolata;Ciliophora;Spirotrichea;Choreotrichida;Strobilidiidae_I;Strobilidiidae_I_X;Strobilidiidae_I_X_sp_;	nanograzers	8.2485	0.0702905		Otu00064	Otu00084	0.541212	1	algae	4	parasites		parasite	Otu00052	0/0/0/2
Otu00031	Otu00233	0.549325	1	algae		Otu00288	Otu00919	0.827152	2	mixotrophs	1	algae		Otu00281	13	5/3/2/3	Eukaryota;Alveolata;Dinoflagellata;Syndiniales;Dino-Group-II;Dino-Group-II-Clade-3;Dino-Group-II-Clade-3_X;Dino-Group-II-Clade-3_X_sp_;	parasites	Otu00281	14.3686	0.114145			Otu00713	Otu00737	0.574636	1	algae	3	nano-grazers		Otu00824	1/0/0/0	Eukaryota;Alveolata;Ciliophora;Spirotrichea;Tintinnida;Eutintinnidae;Eutintinnus;Eutintinnus_medius;	nanograzers	13.0886	0.0663182		Otu00119	Otu00084	0.696744	1	algae	4	parasites		parasite	Otu00056	0/0/1/3
Otu00037	Otu00164	-0.600156	1	algae		Otu00056	Otu00164	0.813522	4	parasites	1	algae		Otu00812	16	5/4/4/3	Eukaryota;Alveolata;Dinoflagellata;Syndiniales;Dino-Group-II;Dino-Group-II-Clade-4;Dino-Group-II-Clade-4_X;Dino-Group-II-Clade-4_X_sp_;	parasites	Otu00812	14.6192	0.0510228			Otu00288	Otu00409	0.600986	2	mixotroph	3	nano-grazers		Otu00165	0/2/1/1	Eukaryota;Opisthokonta;Fungi;Cryptomycota;Cryptomycotina;Cryptomycotina_X;Cryptomycotina_XX;Cryptomycotina_XX_sp_;	parasite	4.93158	0.112205		Otu00124	Otu00064	0.507157	3	nanograzer	1	algae		parasite	Otu00084	2/0/0/1
Otu00037	Otu00056	-0.751761	1	algae		Otu00037	Otu00102	0.787703	1	algae	1	algae												Otu00134	Otu00409	0.575973	2	mixotrophs	3	nano-grazers		Otu00052	0/3/0/1	Eukaryota;Alveolata;Dinoflagellata;Dinophyceae;Peridiniales;Blastodiniaceae;Blastodinium;Blastodinium_navicula;	parasite	7.54027	0.590152		Otu00518	Otu00056	0.655686	4	parasite	4	parasites		parasite	Otu00104	2/0/0/1
Otu00037	Otu00102	0.787703	1	algae		Otu00068	Otu00409	0.785171	2	mixotrophs	3	nanograzers/heterotrophs												Otu00165	Otu00409	0.575973	4	parasite	3	nano-grazers		Otu00056	0/2/0/2	Eukaryota;Alveolata;Dinoflagellata;Syndiniales;Dino-Group-I;Dino-Group-I-Clade-1;Dino-Group-I-Clade-1_X;Dino-Group-I-Clade-1_X_sp_;	parasites	10.5306	2.19017		Otu00737	Otu00056	0.563669	3	nanograzer	4	parasites		parasite	Otu00286	0/0/1/1
Otu00037	Otu00281	-0.61529	1	algae		Otu00056	Otu00177	0.774941	4	parasites	4	parasites												Otu00288	Otu00812	0.720369	2	mixotroph	4	parasite		Otu00812	0/2/1/2	Eukaryota;Alveolata;Dinoflagellata;Syndiniales;Dino-Group-II;Dino-Group-II-Clade-4;Dino-Group-II-Clade-4_X;Dino-Group-II-Clade-4_X_sp_;	parasites	14.6192	0.0510228		Otu00056	Otu00052	0.60611	4	parasite	4	parasites		parasite	Otu00518	0/0/0/1
Otu00037	Otu00812	0.515403	1	algae		Otu00037	Otu00919	0.774803	1	algae	1	algae												Otu01101	Otu00052	0.569519	2	mixotrophs	4	parasite									Otu00288	Otu00022	0.527528	2	mixotroph	1	algae
Otu00037	Otu00919	0.774803	1	algae		Otu00164	Otu00919	0.759271	1	algae	1	algae												Otu00284	Otu00056	0.629746	2	mixotrophs	4	parasite
Otu00102	Otu00134	0.602431	1	algae		Otu00037	Otu00056	0.751761	1	algae	4	parasites												Otu00134	Otu00165	0.575973	2	mixotrophs	4	parasite
Otu00102	Otu00164	-0.679988	1	algae		Otu00068	Otu00164	0.74855	2	mixotrophs	1	algae												Otu00134	Otu00812	0.569519	2	mixotrophs	4	parasite
Otu00102	Otu00165	0.602431	1	algae		Otu00056	Otu00102	0.746126	4	parasites	1	algae												Otu00409	Otu00812	0.640017	3	nano-grazers	4	parasite
Otu00102	Otu00177	-0.561277	1	algae		Otu00102	Otu00919	0.745091	1	algae	1	algae												Otu00052	Otu00056	0.592382	4	parasite	4	parasite
Otu00102	Otu00281	-0.635821	1	algae		Otu00164	Otu00281	0.74104	1	algae	2	mixotrophs												Otu00812	Otu00056	-0.632272	4	parasite	4	parasite
Otu00102	Otu00409	0.850143	1	algae		Otu00713	Otu00288	0.733538	1	algae	2	mixotrophs												Otu00165	Otu00812	0.586676	4	parasite	4	parasite
Otu00102	Otu01316	0.602431	1	algae		Otu00281	Otu00812	0.728713	2	mixotrophs	4	parasites
Otu00102	Otu00288	0.908178	1	algae		Otu01918	Otu00263	0.728303	1	algae	3	nanograzers/heterotrophs
Otu00102	Otu00812	0.688765	1	algae		Otu00263	Otu00919	0.716118	3	nanograzers/heterotrophs	1	algae
Otu00102	Otu00919	0.745091	1	algae		Otu00153	Otu00288	0.711929	4	parasites	2	mixotrophs
Otu00113	Otu00164	0.604345	1	algae		Otu00068	Otu00284	0.711169	2	mixotrophs	2	mixotrophs
Otu00113	Otu00120	-0.548767	1	algae		Otu00054	Otu00919	0.7061	4	parasites	1	algae
Otu00113	Otu00242	0.591728	1	algae		Otu00919	Otu01918	0.7061	1	algae	1	algae
Otu00164	Otu00177	0.608975	1	algae		Otu01918	Otu00812	0.7061	1	algae	4	parasites
Otu00164	Otu00409	-0.69063	1	algae		Otu00056	Otu00068	0.705503	4	parasites	2	mixotrophs
Otu00164	Otu00786	0.569308	1	algae		Otu00288	Otu00409	0.693589	2	mixotrophs	3	nanograzers/heterotrophs
Otu00164	Otu00281	0.74104	1	algae		Otu00179	Otu00919	0.691765	3	nanograzers/heterotrophs	1	algae
Otu00164	Otu00288	-0.664752	1	algae		Otu00164	Otu00409	0.69063	1	algae	3	nanograzers/heterotrophs
Otu00164	Otu00812	-0.618982	1	algae		Otu00102	Otu00812	0.688765	1	algae	4	parasites
Otu00164	Otu00919	-0.759271	1	algae		Otu00102	Otu00164	0.679988	1	algae	1	algae
Otu00179	Otu00919	0.691765	1	algae		Otu00409	Otu00812	0.679223	3	nanograzers/heterotrophs	4	parasites
Otu00179	Otu00612	0.532445	1	algae		Otu00177	Otu00409	0.675374	4	parasites	3	nanograzers/heterotrophs
Otu00288	Otu00409	0.693589	1	algae		Otu00737	Otu00288	0.674714	3	nanograzers/heterotrophs	2	mixotrophs
Otu00288	Otu00713	0.733538	1	algae		Otu01370	Otu00288	0.672295	3	nanograzers/heterotrophs	2	mixotrophs
Otu00288	Otu00737	0.674714	1	algae		Otu00068	Otu00812	0.665853	2	mixotrophs	4	parasites
Otu00288	Otu00812	0.598818	1	algae		Otu00031	Otu00068	0.665312	1	algae	2	mixotrophs
Otu00288	Otu00922	0.543607	1	algae		Otu00164	Otu00288	0.664752	1	algae	2	mixotrophs
Otu00288	Otu01316	0.602431	1	algae		Otu00068	Otu00177	0.662951	2	mixotrophs	4	parasites
Otu00288	Otu01370	0.672295	1	algae		Otu00409	Otu00919	0.660681	3	nanograzers/heterotrophs	1	algae
Otu00288	Otu01918	0.614514	1	algae		Otu00177	Otu00919	0.645863	4	parasites	1	algae
Otu00288	Otu00919	0.827152	1	algae		Otu00031	Otu00281	0.63996	1	algae	2	mixotrophs
Otu00713	Otu00919	0.512662	1	algae		Otu00284	Otu00177	0.638895	2	mixotrophs	4	parasites
Otu00713	Otu00737	0.602431	1	algae		Otu00102	Otu00281	0.635821	1	algae	2	mixotrophs
Otu00713	Otu00824	0.602431	1	algae		Otu00275	Otu00812	0.627372	3	nanograzers/heterotrophs	4	parasites
Otu00713	Otu01370	0.602431	1	algae		Otu00031	Otu00177	0.625074	1	algae	4	parasites
Otu00919	Otu00922	0.543607	1	algae		Otu00164	Otu00812	0.618982	1	algae	4	parasites
Otu00919	Otu01316	0.602431	1	algae		Otu00037	Otu00281	0.61529	1	algae	2	mixotrophs
Otu00919	Otu01918	0.7061	1	algae		Otu00224	Otu00068	0.614961	3	nanograzers/heterotrophs	2	mixotrophs
Otu01918	Otu00263	0.728303	1	algae		Otu01918	Otu00288	0.614514	1	algae	2	mixotrophs
Otu00242	Otu00386	0.630583	4	Fungi-parasite		Otu00164	Otu00177	0.608975	1	algae	4	parasites							16
Otu00004	Otu00170	0.612011	2	mixotrophs		Otu00786	Otu00281	0.608381	2	mixotrophs	2	mixotrophs
Otu00004	Otu00224	-0.60052	2	mixotrophs		Otu00786	Otu00068	0.605929	2	mixotrophs	2	mixotrophs
Otu00068	Otu00224	0.614961	2	mixotrophs		Otu00031	Otu00263	0.604568	1	algae	3	nanograzers/heterotrophs
Otu00068	Otu00409	-0.785171	2	mixotrophs		Otu00113	Otu00164	0.604345	1	algae	1	algae
Otu00068	Otu00177	0.662951	2	mixotrophs		Otu00134	Otu00102	0.602431	2	mixotrophs	1	algae
Otu00068	Otu00164	0.74855	2	mixotrophs		Otu00134	Otu00288	0.602431	2	mixotrophs	2	mixotrophs
Otu00068	Otu00102	-0.551583	2	mixotrophs		Otu00134	Otu00919	0.602431	2	mixotrophs	1	algae
Otu00068	Otu00281	0.883827	2	mixotrophs		Otu00165	Otu00102	0.602431	4	parasites	1	algae
Otu00068	Otu00288	-0.549325	2	mixotrophs		Otu00165	Otu00288	0.602431	4	parasites	2	mixotrophs
Otu00068	Otu00812	-0.665853	2	mixotrophs		Otu00165	Otu00919	0.602431	4	parasites	1	algae
Otu00068	Otu00919	-0.571137	2	mixotrophs		Otu01316	Otu00102	0.602431	4	parasites	1	algae
Otu00134	Otu00263	0.521405	2	mixotrophs		Otu01316	Otu00288	0.602431	4	parasites	2	mixotrophs
Otu00134	Otu00288	0.602431	2	mixotrophs		Otu01316	Otu00919	0.602431	4	parasites	1	algae
Otu00134	Otu00812	0.593688	2	mixotrophs		Otu00281	Otu00056	0.600431	2	mixotrophs	4	parasites
Otu00134	Otu00919	0.602431	2	mixotrophs		Otu00037	Otu00164	0.600156	1	algae	1	algae
Otu00134	Otu00165	0.602431	2	mixotrophs		Otu00288	Otu00812	0.598818	2	mixotrophs	4	parasites
Otu00134	Otu00922	0.543607	2	mixotrophs		Otu00031	Otu00812	0.596238	1	algae	4	parasites
Otu00134	Otu01316	0.602431	2	mixotrophs		Otu00177	Otu00812	0.595022	4	parasites	4	parasites
Otu00284	Otu00068	0.711169	2	mixotrophs		Otu00134	Otu00812	0.593688	2	mixotrophs	4	parasites
Otu00786	Otu00068	0.605929	2	mixotrophs		Otu00663	Otu00263	0.585743	3	nanograzers/heterotrophs	3	nanograzers/heterotrophs							20
Otu00922	Otu01316	0.543607	2	mixotrophs		Otu00281	Otu00919	0.585414	2	mixotrophs	1	algae		.
Otu00124	Otu00472	0.554648	3	nano-grazer		Otu00263	Otu00409	0.584074	3	nanograzers/heterotrophs	3	nanograzers/heterotrophs
Otu00170	Otu00233	0.632155	3	nano-grazers		Otu00056	Otu00812	0.580329	4	parasites	4	parasites
Otu00224	Otu00281	0.562478	3	nano-grazers		Otu00284	Otu00056	0.578228	2	mixotrophs	4	parasites
Otu00233	Otu00612	0.602431	3	nano-grazers		Otu00786	Otu00177	0.574118	2	mixotrophs	4	parasites
Otu00233	Otu00713	0.602431	3	nano-grazers		Otu00056	Otu00409	0.572146	4	parasites	3	nanograzers/heterotrophs
Otu00233	Otu00737	0.602431	3	nano-grazers		Otu00068	Otu00919	0.571137	2	mixotrophs	1	algae
Otu00233	Otu00824	0.602431	3	nano-grazers		Otu00786	Otu00164	0.569308	2	mixotrophs	1	algae
Otu00409	Otu00713	0.544048	3	nano-grazers		Otu00663	Otu00812	0.563778	3	nanograzers/heterotrophs	4	parasites
Otu00409	Otu00812	0.679223	3	nano-grazers		Otu00663	Otu00919	0.563778	3	nanograzers/heterotrophs	1	algae
Otu00409	Otu00919	0.660681	3	nano-grazers		Otu00224	Otu00281	0.562478	3	nanograzers/heterotrophs	2	mixotrophs
Otu00663	Otu00812	0.563778	3	nano-grazers		Otu00102	Otu00177	0.561277	1	algae	4	parasites
Otu00663	Otu00919	0.563778	3	nano-grazers		Otu00031	Otu00409	0.551832	1	algae	3	nanograzers/heterotrophs
Otu00663	Otu01918	0.613471	3	nano-grazers		Otu00068	Otu00102	0.551583	2	mixotrophs	1	algae
Otu00737	Otu00824	0.602431	3	nano-grazers		Otu00068	Otu00288	0.549325	2	mixotrophs	2	mixotrophs
Otu00737	Otu01370	0.602431	3	nano-grazers		Otu00284	Otu00281	0.544079	2	mixotrophs	2	mixotrophs
Otu00824	Otu01370	0.602431	3	nano-grazers		Otu00713	Otu00409	0.544048	1	algae	3	nanograzers/heterotrophs
Otu01370	Otu00233	0.602431	3	nano-grazers		Otu00922	Otu00288	0.543607	2	mixotrophs	2	mixotrophs
Otu00263	Otu00275	0.512662	3	nanoheterotrophs		Otu00113	Otu00056	0.523977	1	algae	4	parasites
Otu00263	Otu00663	0.585743	3	nanoheterotrophs		Otu00263	Otu00288	0.522559	3	nanograzers/heterotrophs	2	mixotrophs
Otu00263	Otu00922	0.522559	3	nanoheterotrophs		Otu00922	Otu00263	0.522559	2	mixotrophs	3	nanograzers/heterotrophs
Otu00263	Otu00409	0.584074	3	nanoheterotrophs		Otu01316	Otu00263	0.522559	4	parasites	3	nanograzers/heterotrophs
Otu00263	Otu00288	0.522559	3	nanoheterotrophs		Otu00224	Otu00177	0.521471	3	nanograzers/heterotrophs	4	parasites
Otu00263	Otu00812	0.878661	3	nanoheterotrophs		Otu00134	Otu00263	0.521405	2	mixotrophs	3	nanograzers/heterotrophs
Otu00263	Otu00919	0.716118	3	nanoheterotrophs		Otu00165	Otu00263	0.521405	4	parasites	3	nanograzers/heterotrophs
Otu00386	Otu00124	0.647277	3	nanoheterotrophs		Otu00037	Otu00812	0.515403	1	algae	4	parasites
Otu00472	Otu00113	0.615891	3	nanoheterotrophs		Otu00275	Otu00263	0.512662	3	nanograzers/heterotrophs	3	nanograzers/heterotrophs
Otu00054	Otu00919	-0.7061	4	parasite		Otu00713	Otu00919	0.512662	1	algae	1	algae
Otu00054	Otu00179	-0.66948	4	parasite
Otu00056	Otu00068	0.705503	4	parasite
Otu00056	Otu00113	0.523977	4	parasite
Otu00056	Otu00164	0.813522	4	parasite
Otu00056	Otu00177	0.774941	4	parasite
Otu00056	Otu00281	0.600431	4	parasite
Otu00056	Otu00284	0.578228	4	parasite
Otu00056	Otu00409	-0.572146	4	parasite
Otu00056	Otu00102	-0.746126	4	parasite
Otu00056	Otu00288	-0.833765	4	parasite
Otu00056	Otu00812	-0.580329	4	parasite
Otu00056	Otu00919	-0.908967	4	parasite
Otu00120	Otu00170	0.608662	4	parasite
Otu00120	Otu00284	0.730156	4	parasite
Otu00120	Otu00922	0.533035	4	parasite
Otu00144	Otu00054	0.57685	4	parasite
Otu00153	Otu00288	0.711929	4	parasite
Otu00153	Otu00170	0.605763	4	parasite
Otu00153	Otu00233	0.652512	4	parasite
Otu00153	Otu00612	0.602431	4	parasite
Otu00153	Otu00713	0.602431	4	parasite
Otu00153	Otu00737	0.652512	4	parasite
Otu00153	Otu00824	0.602431	4	parasite
Otu00153	Otu01370	0.602431	4	parasite
Otu00165	Otu00263	0.521405	4	parasite
Otu00165	Otu00288	0.602431	4	parasite
Otu00165	Otu00919	0.602431	4	parasite
Otu00165	Otu00922	0.543607	4	parasite
Otu00165	Otu01316	0.602431	4	parasite
Otu00177	Otu00224	0.521471	4	parasite
Otu00177	Otu00284	0.638895	4	parasite
Otu00177	Otu00409	-0.675374	4	parasite
Otu00177	Otu00786	0.574118	4	parasite
Otu00177	Otu00281	0.877844	4	parasite
Otu00177	Otu00812	-0.595022	4	parasite
Otu00177	Otu00919	-0.645863	4	parasite
Otu00275	Otu00812	0.627372	4	parasite
Otu00275	Otu01918	0.602431	4	parasite
Otu00281	Otu00284	0.544079	4	parasite
Otu00281	Otu00409	-0.831268	4	parasite
Otu00281	Otu00786	0.608381	4	parasite
Otu00281	Otu00812	-0.728713	4	parasite
Otu00281	Otu00919	-0.585414	4	parasite
Otu00401	Otu00124	0.560925	4	parasite
Otu00612	Otu00713	0.602431	4	parasite
Otu00612	Otu00737	0.602431	4	parasite
Otu00612	Otu00824	0.602431	4	parasite
Otu00612	Otu01370	0.602431	4	parasite
Otu00812	Otu01918	0.7061	4	parasite
Otu00812	Otu00919	0.873981	4	parasite
Otu01316	Otu00263	0.522559	4	parasite
[truncated: 3 more columns]

## Sheet: Table S8
Table S8. networks characteristics
	surface all	surface selected	secchi	2xsecchi
Total edges (connections)	155	104	23	16
Nodes (OTUs)	42	30	15	15
Clustering coefficient	0.521	0.638	0.489	0.2
Connected components	1	1	1	2
Network diameter	6	3	6	6
Network radius	3	2	3	2
Network Centralization	0.323	0.446	0.159	0.154
Shorthest paths	1722	870	210	102
Characteristic path length	2.425	1.972	2.933	2.373
Average number of neighbours	7.381	6.933	3.067	2.133
Netwotk density	0.18	0.239	0.219	0.152
Network heterogeneity	0.619	0.795	0.42	0.48
